# Supplementary material
Source: publisher figshare collection journal article supplement (https://gsajournals.figshare.com/ndownloader/files/25800080)
Supplement: Supplementary file 1 [file 25800080]

## Sheet: Cl1
Significant Kegg terms	TermID	Term	Enrichment	logP	FDR_BH	Genes in Term	Target Genes in Term	Fraction of Targets in Term	Total Target Genes	Total Genes	Entrez Gene IDs	Gene Symbols
Enrichment p<0.01	dme00310	Lysine degradation	0.00860583	-4.75532	1	31	5	0.0458716	109	2584	3.40644e+24	LKR,CG9149,CG4565,ash1,CG5321
Enrichment p<0.01	ko00310	Lysine degradation	0.00860583	-4.75532	1	31	5	0.0458716	109	2584	3.40644e+24	LKR,CG9149,CG4565,ash1,CG5321
	M00177	Ribosome, eukaryotes	0.0113891	-4.4751	1	89	9	0.0825688	109	2584	4.35644e+44	RpS28a,RpS16,RpL12,RpL39,RpS25,RpL10Ab,RpL7,RpL17,RpS19a
	dme_M00177	Ribosome, eukaryotes	0.0113891	-4.4751	1	89	9	0.0825688	109	2584	4.35644e+44	RpS28a,RpS16,RpL12,RpL39,RpS25,RpL10Ab,RpL7,RpL17,RpS19a
	ko04320	Dorso-ventral axis formation	0.0248514	-3.69484	1	27	4	0.0366972	109	2584	3.12393e+21	egh,aub,orb,AGO3
	dme04320	Dorso-ventral axis formation	0.0248514	-3.69484	1	27	4	0.0366972	109	2584	3.12393e+21	egh,aub,orb,AGO3
	dme00900	Terpenoid backbone biosynthesis	0.0375384	-3.28239	1	18	3	0.0275229	109	2584	381474280331708	CG9149,Hmgcr,CG10778
	ko00900	Terpenoid backbone biosynthesis	0.0375384	-3.28239	1	18	3	0.0275229	109	2584	381474280331708	CG9149,Hmgcr,CG10778
	M00095	C5 isoprenoid biosynthesis, mevalonate pathway	0.0418021	-3.17481	1	8	2	0.0183486	109	2584	3814742803	CG9149,Hmgcr
	dme_M00361	Nucleotide sugar biosynthesis, eukaryotes	0.0418021	-3.17481	1	8	2	0.0183486	109	2584	3807633903	Gale,mmy
	M00361	Nucleotide sugar biosynthesis, eukaryotes	0.0418021	-3.17481	1	8	2	0.0183486	109	2584	3807633903	Gale,mmy
	dme_M00095	C5 isoprenoid biosynthesis, mevalonate pathway	0.0418021	-3.17481	1	8	2	0.0183486	109	2584	3814742803	CG9149,Hmgcr
	ko03010	Ribosome	0.0466425	-3.06524	1	131	10	0.0917431	109	2584	4.35644e+49	RpS28a,RpS16,RpL12,RpL39,RpS25,RpL10Ab,RpL7,RpL17,RpS19a,mRpS16
	dme03010	Ribosome	0.0466425	-3.06524	1	131	10	0.0917431	109	2584	4.35644e+49	RpS28a,RpS16,RpL12,RpL39,RpS25,RpL10Ab,RpL7,RpL17,RpS19a,mRpS16
	dme00770	Pantothenate and CoA biosynthesis	0.0635994	-2.75515	1	10	2	0.0183486	109	2584	4067542295	CRMP,Ppcs
	ko00770	Pantothenate and CoA biosynthesis	0.0635994	-2.75515	1	10	2	0.0183486	109	2584	4067542295	CRMP,Ppcs
	ko00290	Valine, leucine and isoleucine biosynthesis	0.0826016	-2.49373	1	2	1	0.00917431	109	2584	41117	CG8129
	dme00290	Valine, leucine and isoleucine biosynthesis	0.0826016	-2.49373	1	2	1	0.00917431	109	2584	41117	CG8129
	M00408	ESCRT-0 complex	0.0826016	-2.49373	1	2	1	0.00917431	109	2584	33458	Hrs
	dme00100	Steroid biosynthesis	0.0826016	-2.49373	1	2	1	0.00917431	109	2584	41033	CG8112
	M00100	Sphingosine degradation	0.0826016	-2.49373	1	2	1	0.00917431	109	2584	32089	Sk1
	ko00100	Steroid biosynthesis	0.0826016	-2.49373	1	2	1	0.00917431	109	2584	41033	CG8112
	dme_M00100	Sphingosine degradation	0.0826016	-2.49373	1	2	1	0.00917431	109	2584	32089	Sk1
	dme_M00408	ESCRT-0 complex	0.0826016	-2.49373	1	2	1	0.00917431	109	2584	33458	Hrs
	ko04070	Phosphatidylinositol signaling system	0.0918223	-2.3879	1	41	4	0.0366972	109	2584	3.22854e+19	IP3K2,fab1,Itp-r83A,CG31140
	dme04070	Phosphatidylinositol signaling system	0.0918223	-2.3879	1	41	4	0.0366972	109	2584	3.22854e+19	IP3K2,fab1,Itp-r83A,CG31140
	dme_M00055	N-glycan precursor biosynthesis	0.101614	-2.28658	1	13	2	0.0183486	109	2584	3413438374	wol,CG1291
	M00055	N-glycan precursor biosynthesis	0.101614	-2.28658	1	13	2	0.0183486	109	2584	3413438374	wol,CG1291
	dme04745	Phototransduction - fly	0.102633	-2.27659	1	27	3	0.0275229	109	2584	452344066436385	Ggamma30A,Itp-r83A,CG17760
	ko04745	Phototransduction - fly	0.102633	-2.27659	1	27	3	0.0275229	109	2584	452344066436385	Ggamma30A,Itp-r83A,CG17760
	ko00520	Amino sugar and nucleotide sugar metabolism	0.119156	-2.12732	1	45	4	0.0366972	109	2584	3.80764e+19	Gale,CG6218,mmy,CG8417
	dme00520	Amino sugar and nucleotide sugar metabolism	0.119156	-2.12732	1	45	4	0.0366972	109	2584	3.80764e+19	Gale,CG6218,mmy,CG8417
	M00141	C1-unit interconversion, eukaryotes	0.12133	-2.10924	1	3	1	0.00917431	109	2584	41279	pug
	M00046	Pyrimidine degradation, uracil => beta-alanine, thymine => 3-aminoisobutanoate	0.12133	-2.10924	1	3	1	0.00917431	109	2584	40675	CRMP
	dme_M00046	Pyrimidine degradation, uracil => beta-alanine, thymine => 3-aminoisobutanoate	0.12133	-2.10924	1	3	1	0.00917431	109	2584	40675	CRMP
	dme_M00020	Serine biosynthesis, glycerate-3P => serine	0.12133	-2.10924	1	3	1	0.00917431	109	2584	39085	aay
	dme_M00141	C1-unit interconversion, eukaryotes	0.12133	-2.10924	1	3	1	0.00917431	109	2584	41279	pug
	M00020	Serine biosynthesis, glycerate-3P => serine	0.12133	-2.10924	1	3	1	0.00917431	109	2584	39085	aay
	M00389	APC/C complex	0.129621	-2.04314	1	15	2	0.0183486	109	2584	4557437808	ida,fzr2
	dme_M00389	APC/C complex	0.129621	-2.04314	1	15	2	0.0183486	109	2584	4557437808	ida,fzr2
	dme01230	Biosynthesis of amino acids	0.130305	-2.03788	1	64	5	0.0458716	109	2584	4.11174e+24	CG8129,Tpi,CG1516,Gs1,aay
	ko01230	Biosynthesis of amino acids	0.130305	-2.03788	1	64	5	0.0458716	109	2584	4.11174e+24	CG8129,Tpi,CG1516,Gs1,aay
	dme00910	Nitrogen metabolism	0.159157	-1.83786	1	17	2	0.0183486	109	2584	3478633172	CAH1,Gs1
	ko00910	Nitrogen metabolism	0.159157	-1.83786	1	17	2	0.0183486	109	2584	3478633172	CAH1,Gs1
	M00359	Aminoacyl-tRNA biosynthesis, eukaryotes	0.192186	-1.64929	1	36	3	0.0275229	109	2584	398293964445783	Aats-tyr,Aats-gly,Aats-val
	ko00562	Inositol phosphate metabolism	0.192186	-1.64929	1	36	3	0.0275229	109	2584	435823228537033	Tpi,IP3K2,fab1
	dme_M00359	Aminoacyl-tRNA biosynthesis, eukaryotes	0.192186	-1.64929	1	36	3	0.0275229	109	2584	398293964445783	Aats-tyr,Aats-gly,Aats-val
	dme00562	Inositol phosphate metabolism	0.192186	-1.64929	1	36	3	0.0275229	109	2584	435823228537033	Tpi,IP3K2,fab1
	M00073	N-glycan precursor trimming	0.193992	-1.63994	1	5	1	0.00917431	109	2584	31957	alpha-Man-I
	dme_M00120	Coenzyme A biosynthesis, pantothenate => CoA	0.193992	-1.63994	1	5	1	0.00917431	109	2584	42295	Ppcs
	M00120	Coenzyme A biosynthesis, pantothenate => CoA	0.193992	-1.63994	1	5	1	0.00917431	109	2584	42295	Ppcs
	dme_M00073	N-glycan precursor trimming	0.193992	-1.63994	1	5	1	0.00917431	109	2584	31957	alpha-Man-I
	ko00510	N-Glycan biosynthesis	0.203148	-1.59382	1	37	3	0.0275229	109	2584	341343837431957	wol,CG1291,alpha-Man-I
	dme00510	N-Glycan biosynthesis	0.203148	-1.59382	1	37	3	0.0275229	109	2584	341343837431957	wol,CG1291,alpha-Man-I
	ko04130	SNARE interactions in vesicular transport	0.205388	-1.58286	1	20	2	0.0183486	109	2584	4009434966	Bet1,Syx5
	dme00640	Propanoate metabolism	0.205388	-1.58286	1	20	2	0.0183486	109	2584	3814741067	CG9149,skap
	ko00640	Propanoate metabolism	0.205388	-1.58286	1	20	2	0.0183486	109	2584	3814741067	CG9149,skap
	dme04130	SNARE interactions in vesicular transport	0.205388	-1.58286	1	20	2	0.0183486	109	2584	4009434966	Bet1,Syx5
	dme00564	Glycerophospholipid metabolism	0.227018	-1.48272	1	58	4	0.0366972	109	2584	1.17353e+20	Cct1,Cct2,Dhap-at,CG31140
	ko00564	Glycerophospholipid metabolism	0.227018	-1.48272	1	58	4	0.0366972	109	2584	1.17353e+20	Cct1,Cct2,Dhap-at,CG31140
	dme03060	Protein export	0.236962	-1.43985	1	22	2	0.0183486	109	2584	3733739028	CG11110,Srp68
	ko03060	Protein export	0.236962	-1.43985	1	22	2	0.0183486	109	2584	3733739028	CG11110,Srp68
	dme00970	Aminoacyl-tRNA biosynthesis	0.25982	-1.34776	1	42	3	0.0275229	109	2584	398293964445783	Aats-tyr,Aats-gly,Aats-val
	ko00970	Aminoacyl-tRNA biosynthesis	0.25982	-1.34776	1	42	3	0.0275229	109	2584	398293964445783	Aats-tyr,Aats-gly,Aats-val
	dme00430	Taurine and hypotaurine metabolism	0.260696	-1.3444	1	7	1	0.00917431	109	2584	37139	CG5493
	dme00072	Synthesis and degradation of ketone bodies	0.260696	-1.3444	1	7	1	0.00917431	109	2584	38147	CG9149
	M00048	Inosine monophosphate biosynthesis, PRPP + glutamine => IMP	0.260696	-1.3444	1	7	1	0.00917431	109	2584	38753	Prat2
	dme_M00048	Inosine monophosphate biosynthesis, PRPP + glutamine => IMP	0.260696	-1.3444	1	7	1	0.00917431	109	2584	38753	Prat2
	ko00430	Taurine and hypotaurine metabolism	0.260696	-1.3444	1	7	1	0.00917431	109	2584	37139	CG5493
	ko00072	Synthesis and degradation of ketone bodies	0.260696	-1.3444	1	7	1	0.00917431	109	2584	38147	CG9149
	dme00630	Glyoxylate and dicarboxylate metabolism	0.268785	-1.31384	1	24	2	0.0183486	109	2584	3814733172	CG9149,Gs1
	ko00630	Glyoxylate and dicarboxylate metabolism	0.268785	-1.31384	1	24	2	0.0183486	109	2584	3814733172	CG9149,Gs1
	ko00020	Citrate cycle (TCA cycle)	0.271426	-1.30407	1	43	3	0.0275229	109	2584	367603602041067	ATPCL,CG1516,skap
	dme00020	Citrate cycle (TCA cycle)	0.271426	-1.30407	1	43	3	0.0275229	109	2584	367603602041067	ATPCL,CG1516,skap
	ko04141	Protein processing in endoplasmic reticulum	0.27994	-1.27318	1	126	7	0.0642202	109	2584	4.28523e+34	Hsp68,CG8974,CG10420,CG7556,alpha-Man-I,CG9175,P58IPK
	dme04141	Protein processing in endoplasmic reticulum	0.27994	-1.27318	1	126	7	0.0642202	109	2584	4.28523e+34	Hsp68,CG8974,CG10420,CG7556,alpha-Man-I,CG9175,P58IPK
	ko01200	Carbon metabolism	0.280649	-1.27065	1	105	6	0.0550459	109	2584	4.11174e+29	CG8129,Tpi,CG9149,CG1516,skap,aay
	dme01200	Carbon metabolism	0.280649	-1.27065	1	105	6	0.0550459	109	2584	4.11174e+29	CG8129,Tpi,CG9149,CG1516,skap,aay
	dme00340	Histidine metabolism	0.291966	-1.23112	1	8	1	0.00917431	109	2584	36076	Hdc
	M00632	Galactose degradation, Leloir pathway, galactose => alpha-D-glucose-1P	0.291966	-1.23112	1	8	1	0.00917431	109	2584	38076	Gale
	dme_M00632	Galactose degradation, Leloir pathway, galactose => alpha-D-glucose-1P	0.291966	-1.23112	1	8	1	0.00917431	109	2584	38076	Gale
	ko00340	Histidine metabolism	0.291966	-1.23112	1	8	1	0.00917431	109	2584	36076	Hdc
	ko04144	Endocytosis	0.304277	-1.18982	1	87	5	0.0458716	109	2584	4.28524e+24	Hsp68,Arf51F,Hrs,btl,Pvr
	dme04144	Endocytosis	0.304277	-1.18982	1	87	5	0.0458716	109	2584	4.28524e+24	Hsp68,Arf51F,Hrs,btl,Pvr
	dme00230	Purine metabolism	0.314172	-1.15781	1	131	7	0.0642202	109	2584	4.38734e+34	ras,Prat2,CG5276,Gyc-89Da,Pde1c,Adgf-A,dnc
	ko00230	Purine metabolism	0.314172	-1.15781	1	131	7	0.0642202	109	2584	4.38734e+34	ras,Prat2,CG5276,Gyc-89Da,Pde1c,Adgf-A,dnc
	ko00130	Ubiquinone and other terpenoid-quinone biosynthesis	0.321926	-1.13343	1	9	1	0.00917431	109	2584	40263	CG11796
	dme00130	Ubiquinone and other terpenoid-quinone biosynthesis	0.321926	-1.13343	1	9	1	0.00917431	109	2584	40263	CG11796
	dme02010	ABC transporters	0.321926	-1.13343	1	9	1	0.00917431	109	2584	38193	ABCB7
	ko02010	ABC transporters	0.321926	-1.13343	1	9	1	0.00917431	109	2584	38193	ABCB7
	ko00260	Glycine, serine and threonine metabolism	0.332197	-1.10203	1	28	2	0.0183486	109	2584	4111739085	CG8129,aay
	dme00051	Fructose and mannose metabolism	0.332197	-1.10203	1	28	2	0.0183486	109	2584	4358241192	Tpi,CG8417
	dme00260	Glycine, serine and threonine metabolism	0.332197	-1.10203	1	28	2	0.0183486	109	2584	4111739085	CG8129,aay
	ko00051	Fructose and mannose metabolism	0.332197	-1.10203	1	28	2	0.0183486	109	2584	4358241192	Tpi,CG8417
	dme00250	Alanine, aspartate and glutamate metabolism	0.347855	-1.05597	1	29	2	0.0183486	109	2584	3875333172	Prat2,Gs1
	ko00250	Alanine, aspartate and glutamate metabolism	0.347855	-1.05597	1	29	2	0.0183486	109	2584	3875333172	Prat2,Gs1
	dme00360	Phenylalanine metabolism	0.350629	-1.04803	1	10	1	0.00917431	109	2584	40263	CG11796
	ko00360	Phenylalanine metabolism	0.350629	-1.04803	1	10	1	0.00917431	109	2584	40263	CG11796
	ko00920	Sulfur metabolism	0.350629	-1.04803	1	10	1	0.00917431	109	2584	43516	CG7789
	dme00920	Sulfur metabolism	0.350629	-1.04803	1	10	1	0.00917431	109	2584	43516	CG7789
	dme00620	Pyruvate metabolism	0.35361	-1.03956	1	50	3	0.0275229	109	2584	381473602049997	CG9149,CG1516,CG11052
	ko00620	Pyruvate metabolism	0.35361	-1.03956	1	50	3	0.0275229	109	2584	381473602049997	CG9149,CG1516,CG11052
	M00130	Inositol phosphate metabolism, PI=> PIP2 => Ins(1,4,5)P3 => Ins(1,3,4,5)P4	0.378127	-0.972524	1	11	1	0.00917431	109	2584	32285	IP3K2
	dme_M00130	Inositol phosphate metabolism, PI=> PIP2 => Ins(1,4,5)P3 => Ins(1,3,4,5)P4	0.378127	-0.972524	1	11	1	0.00917431	109	2584	32285	IP3K2
	ko04145	Phagosome	0.380781	-0.965532	1	74	4	0.0366972	109	2584	4.08483e+19	alphaTub84B,Hrs,fab1,CG11459
	dme04145	Phagosome	0.380781	-0.965532	1	74	4	0.0366972	109	2584	4.08483e+19	alphaTub84B,Hrs,fab1,CG11459
	dme00670	One carbon pool by folate	0.404472	-0.905173	1	12	1	0.00917431	109	2584	41279	pug
	ko00670	One carbon pool by folate	0.404472	-0.905173	1	12	1	0.00917431	109	2584	41279	pug
	dme_M00050	Guanine ribonucleotide biosynthesis IMP => GDP,GTP	0.42971	-0.844645	1	13	1	0.00917431	109	2584	43873	ras
	ko00740	Riboflavin metabolism	0.42971	-0.844645	1	13	1	0.00917431	109	2584	40119	CG9452
	M00050	Guanine ribonucleotide biosynthesis IMP => GDP,GTP	0.42971	-0.844645	1	13	1	0.00917431	109	2584	43873	ras
	dme00740	Riboflavin metabolism	0.42971	-0.844645	1	13	1	0.00917431	109	2584	40119	CG9452
	ko04150	mTOR signaling pathway	0.453223	-0.79137	1	36	2	0.0183486	109	2584	335504133139	eIF-4B,S6kII
	dme04150	mTOR signaling pathway	0.453223	-0.79137	1	36	2	0.0183486	109	2584	335504133139	eIF-4B,S6kII
	ko00981	Insect hormone biosynthesis	0.453888	-0.789905	1	14	1	0.00917431	109	2584	32858	Cyp18a1
	dme_M00003	Gluconeogenesis, oxaloacetate => fructose-6P	0.453888	-0.789905	1	14	1	0.00917431	109	2584	43582	Tpi
	dme00981	Insect hormone biosynthesis	0.453888	-0.789905	1	14	1	0.00917431	109	2584	32858	Cyp18a1
	M00003	Gluconeogenesis, oxaloacetate => fructose-6P	0.453888	-0.789905	1	14	1	0.00917431	109	2584	43582	Tpi
	dme_M00002	Glycolysis, core module involving three-carbon compounds	0.47705	-0.740134	1	15	1	0.00917431	109	2584	43582	Tpi
	M00002	Glycolysis, core module involving three-carbon compounds	0.47705	-0.740134	1	15	1	0.00917431	109	2584	43582	Tpi
	M00355	Spliceosome, 35S U5-snRNP	0.509036	-0.675236	1	40	2	0.0183486	109	2584	4285241437	Hsp68,CG31368
	dme_M00355	Spliceosome, 35S U5-snRNP	0.509036	-0.675236	1	40	2	0.0183486	109	2584	4285241437	Hsp68,CG31368
	M00353	Spliceosome, Prp19/CDC5L complex	0.520493	-0.652978	1	17	1	0.00917431	109	2584	42852	Hsp68
	dme_M00353	Spliceosome, Prp19/CDC5L complex	0.520493	-0.652978	1	17	1	0.00917431	109	2584	42852	Hsp68
	ko00650	Butanoate metabolism	0.520493	-0.652978	1	17	1	0.00917431	109	2584	38147	CG9149
	dme00650	Butanoate metabolism	0.520493	-0.652978	1	17	1	0.00917431	109	2584	38147	CG9149
	ko00350	Tyrosine metabolism	0.540854	-0.614606	1	18	1	0.00917431	109	2584	40263	CG11796
	ko04140	Regulation of autophagy	0.540854	-0.614606	1	18	1	0.00917431	109	2584	42132	Atg8b
	dme00350	Tyrosine metabolism	0.540854	-0.614606	1	18	1	0.00917431	109	2584	40263	CG11796
	dme04140	Regulation of autophagy	0.540854	-0.614606	1	18	1	0.00917431	109	2584	42132	Atg8b
	dme00410	beta-Alanine metabolism	0.540854	-0.614606	1	18	1	0.00917431	109	2584	40675	CRMP
	ko00410	beta-Alanine metabolism	0.540854	-0.614606	1	18	1	0.00917431	109	2584	40675	CRMP
	dme00563	Glycosylphosphatidylinositol(GPI)-anchor biosynthesis	0.560358	-0.57918	1	19	1	0.00917431	109	2584	36049	CG2292
	ko00380	Tryptophan metabolism	0.560358	-0.57918	1	19	1	0.00917431	109	2584	38147	CG9149
	ko00563	Glycosylphosphatidylinositol(GPI)-anchor biosynthesis	0.560358	-0.57918	1	19	1	0.00917431	109	2584	36049	CG2292
	dme00380	Tryptophan metabolism	0.560358	-0.57918	1	19	1	0.00917431	109	2584	38147	CG9149
	ko04080	Neuroactive ligand-receptor interaction	0.561056	-0.577935	1	44	2	0.0183486	109	2584	3324832864	GABA-B-R3,CCKLR-17D3
	dme04080	Neuroactive ligand-receptor interaction	0.561056	-0.577935	1	44	2	0.0183486	109	2584	3324832864	GABA-B-R3,CCKLR-17D3
	ko04630	Jak-STAT signaling pathway	0.579041	-0.546383	1	20	1	0.00917431	109	2584	35927	Su(var)2-10
	dme04630	Jak-STAT signaling pathway	0.579041	-0.546383	1	20	1	0.00917431	109	2584	35927	Su(var)2-10
	ko00983	Drug metabolism - other enzymes	0.59745	-0.515085	1	47	2	0.0183486	109	2584	4387340675	ras,CRMP
	dme00983	Drug metabolism - other enzymes	0.59745	-0.515085	1	47	2	0.0183486	109	2584	4387340675	ras,CRMP
	ko04120	Ubiquitin mediated proteolysis	0.600932	-0.509274	1	98	4	0.0366972	109	2584	4.55744e+19	ida,fzr2,sinah,Su(var)2-10
	dme04120	Ubiquitin mediated proteolysis	0.600932	-0.509274	1	98	4	0.0366972	109	2584	4.55744e+19	ida,fzr2,sinah,Su(var)2-10
	M00011	Citrate cycle, second carbon oxidation, 2-oxoglutarate => oxaloacetate	0.630497	-0.461247	1	23	1	0.00917431	109	2584	41067	skap
	dme_M00011	Citrate cycle, second carbon oxidation, 2-oxoglutarate => oxaloacetate	0.630497	-0.461247	1	23	1	0.00917431	109	2584	41067	skap
	M00001	Glycolysis (Embden-Meyerhof pathway), glucose => pyruvate	0.646223	-0.43661	1	24	1	0.00917431	109	2584	43582	Tpi
	dme_M00001	Glycolysis (Embden-Meyerhof pathway), glucose => pyruvate	0.646223	-0.43661	1	24	1	0.00917431	109	2584	43582	Tpi
	dme00330	Arginine and proline metabolism	0.663411	-0.410361	1	53	2	0.0183486	109	2584	4362033172	PH4alphaEFB,Gs1
	ko00330	Arginine and proline metabolism	0.663411	-0.410361	1	53	2	0.0183486	109	2584	4362033172	PH4alphaEFB,Gs1
	dme00270	Cysteine and methionine metabolism	0.675714	-0.391985	1	26	1	0.00917431	109	2584	37139	CG5493
	ko00270	Cysteine and methionine metabolism	0.675714	-0.391985	1	26	1	0.00917431	109	2584	37139	CG5493
	ko00600	Sphingolipid metabolism	0.702767	-0.35273	1	28	1	0.00917431	109	2584	32089	Sk1
	dme00600	Sphingolipid metabolism	0.702767	-0.35273	1	28	1	0.00917431	109	2584	32089	Sk1
	ko03013	RNA transport	0.709027	-0.343862	1	139	5	0.0458716	109	2584	3.17878e+27	Nxf3,Phax,eIF-4B,CG42304,Nup44A
	dme03013	RNA transport	0.709027	-0.343862	1	139	5	0.0458716	109	2584	3.17878e+27	Nxf3,Phax,eIF-4B,CG42304,Nup44A
	dme00071	Fatty acid degradation	0.727582	-0.318029	1	30	1	0.00917431	109	2584	38147	CG9149
	ko00071	Fatty acid degradation	0.727582	-0.318029	1	30	1	0.00917431	109	2584	38147	CG9149
	dme00280	Valine, leucine and isoleucine degradation	0.739208	-0.302175	1	31	1	0.00917431	109	2584	38147	CG9149
	ko00280	Valine, leucine and isoleucine degradation	0.739208	-0.302175	1	31	1	0.00917431	109	2584	38147	CG9149
	dme_M00427	Nuclear pore complex	0.761006	-0.273114	1	33	1	0.00917431	109	2584	35762	Nup44A
	M00427	Nuclear pore complex	0.761006	-0.273114	1	33	1	0.00917431	109	2584	35762	Nup44A
	dme_M00014	Glucuronate pathway (uronate pathway)	0.780997	-0.247184	1	35	1	0.00917431	109	2584	36624	CG10131
	ko00052	Galactose metabolism	0.780997	-0.247184	1	35	1	0.00917431	109	2584	38076	Gale
	M00009	Citrate cycle (TCA cycle, Krebs cycle)	0.780997	-0.247184	1	35	1	0.00917431	109	2584	41067	skap
	dme00052	Galactose metabolism	0.780997	-0.247184	1	35	1	0.00917431	109	2584	38076	Gale
	dme_M00009	Citrate cycle (TCA cycle, Krebs cycle)	0.780997	-0.247184	1	35	1	0.00917431	109	2584	41067	skap
	M00014	Glucuronate pathway (uronate pathway)	0.780997	-0.247184	1	35	1	0.00917431	109	2584	36624	CG10131
	dme03040	Spliceosome	0.784295	-0.242971	1	125	4	0.0366972	109	2584	3.66194e+19	tra2,Hsp68,CG31368,Hrb98DE
	ko03040	Spliceosome	0.784295	-0.242971	1	125	4	0.0366972	109	2584	3.66194e+19	tra2,Hsp68,CG31368,Hrb98DE
	ko03015	mRNA surveillance pathway	0.804186	-0.217925	1	70	2	0.0183486	109	2584	317878117365	Nxf3,HBS1
	dme03015	mRNA surveillance pathway	0.804186	-0.217925	1	70	2	0.0183486	109	2584	317878117365	Nxf3,HBS1
	ko03022	Basal transcription factors	0.816141	-0.203168	1	39	1	0.00917431	109	2584	40790	TfIIFalpha
	dme03022	Basal transcription factors	0.816141	-0.203168	1	39	1	0.00917431	109	2584	40790	TfIIFalpha
	ko01212	Fatty acid metabolism	0.831556	-0.184457	1	41	1	0.00917431	109	2584	38147	CG9149
	dme01212	Fatty acid metabolism	0.831556	-0.184457	1	41	1	0.00917431	109	2584	38147	CG9149
	dme00860	Porphyrin and chlorophyll metabolism	0.845689	-0.167603	1	43	1	0.00917431	109	2584	32260	Fer3HCH
	ko00860	Porphyrin and chlorophyll metabolism	0.845689	-0.167603	1	43	1	0.00917431	109	2584	32260	Fer3HCH
	dme00561	Glycerolipid metabolism	0.852309	-0.159807	1	44	1	0.00917431	109	2584	42836	CG31140
	ko00561	Glycerolipid metabolism	0.852309	-0.159807	1	44	1	0.00917431	109	2584	42836	CG31140
	ko00040	Pentose and glucuronate interconversions	0.858647	-0.152398	1	45	1	0.00917431	109	2584	36624	CG10131
	dme00040	Pentose and glucuronate interconversions	0.858647	-0.152398	1	45	1	0.00917431	109	2584	36624	CG10131
	dme00240	Pyrimidine metabolism	0.869611	-0.139709	1	82	2	0.0183486	109	2584	4067541373	CRMP,CG5276
	ko00240	Pyrimidine metabolism	0.869611	-0.139709	1	82	2	0.0183486	109	2584	4067541373	CRMP,CG5276
	ko00010	Glycolysis / Gluconeogenesis	0.891394	-0.114968	1	51	1	0.00917431	109	2584	43582	Tpi
	dme04068	FoxO signaling pathway	0.891394	-0.114968	1	51	1	0.00917431	109	2584	42132	Atg8b
	dme00010	Glycolysis / Gluconeogenesis	0.891394	-0.114968	1	51	1	0.00917431	109	2584	43582	Tpi
	dme04142	Lysosome	0.901457	-0.103743	1	90	2	0.0183486	109	2584	4074131381	CG11459,rb
	ko04142	Lysosome	0.901457	-0.103743	1	90	2	0.0183486	109	2584	4074131381	CG11459,rb
	ko04391	Hippo signaling pathway - fly	0.916609	-0.0870747	1	57	1	0.00917431	109	2584	33245	ds
	dme04391	Hippo signaling pathway - fly	0.916609	-0.0870747	1	57	1	0.00917431	109	2584	33245	ds
	ko00982	Drug metabolism - cytochrome P450	0.93312	-0.0692219	1	62	1	0.00917431	109	2584	38973	se
	dme00980	Metabolism of xenobiotics by cytochrome P450	0.93312	-0.0692219	1	62	1	0.00917431	109	2584	38973	se
	ko00980	Metabolism of xenobiotics by cytochrome P450	0.93312	-0.0692219	1	62	1	0.00917431	109	2584	38973	se
	dme00982	Drug metabolism - cytochrome P450	0.93312	-0.0692219	1	62	1	0.00917431	109	2584	38973	se
	dme00480	Glutathione metabolism	0.93601	-0.066129	1	63	1	0.00917431	109	2584	38973	se
	ko00480	Glutathione metabolism	0.93601	-0.066129	1	63	1	0.00917431	109	2584	38973	se
	dme04146	Peroxisome	0.948707	-0.0526549	1	68	1	0.00917431	109	2584	53586	Dhap-at
	ko04146	Peroxisome	0.948707	-0.0526549	1	68	1	0.00917431	109	2584	53586	Dhap-at
	dme03008	Ribosome biogenesis in eukaryotes	0.976952	-0.0233177	1	86	1	0.00917431	109	2584	317878	Nxf3
	ko03008	Ribosome biogenesis in eukaryotes	0.976952	-0.0233177	1	86	1	0.00917431	109	2584	317878	Nxf3
	dme04310	Wnt signaling pathway	0.97892	-0.0213054	1	88	1	0.00917431	109	2584	39885	sinah
	ko04310	Wnt signaling pathway	0.97892	-0.0213054	1	88	1	0.00917431	109	2584	39885	sinah
	M00400	p97-Ufd1-Npl4 complex	1	-2.85589e-12	1	3	0	0	109	2584
	dme00780	Biotin metabolism	1	-2.85589e-12	1	3	0	0	109	2584
	ko00785	Lipoic acid metabolism	1	-2.85589e-12	1	3	0	0	109	2584
	dme_M00288	RPA complex	1	-2.85589e-12	1	3	0	0	109	2584
	dme_M00058	Glycosaminoglycan biosynthesis, chondroitin sulfate backbone	1	-2.85589e-12	1	3	0	0	109	2584
	M00288	RPA complex	1	-2.85589e-12	1	3	0	0	109	2584
	dme_M00151	Cytochrome bc1 complex respiratory unit	1	-2.85589e-12	1	3	0	0	109	2584
	dme_M00015	Proline biosynthesis, glutamate => proline	1	-2.85589e-12	1	3	0	0	109	2584
	M00399	Cap binding complex	1	-2.85589e-12	1	3	0	0	109	2584
	M00291	MRN complex	1	-2.85589e-12	1	3	0	0	109	2584
	dme_M00400	p97-Ufd1-Npl4 complex	1	-2.85589e-12	1	3	0	0	109	2584
	dme00785	Lipoic acid metabolism	1	-2.85589e-12	1	3	0	0	109	2584
	dme00730	Thiamine metabolism	1	-2.85589e-12	1	3	0	0	109	2584
	dme_M00134	Polyamine biosynthesis, arginine => ornithine => putrescine	1	-2.85589e-12	1	3	0	0	109	2584
	dme_M00399	Cap binding complex	1	-2.85589e-12	1	3	0	0	109	2584
	M00151	Cytochrome bc1 complex respiratory unit	1	-2.85589e-12	1	3	0	0	109	2584
	M00058	Glycosaminoglycan biosynthesis, chondroitin sulfate backbone	1	-2.85589e-12	1	3	0	0	109	2584
	dme_M00086	beta-Oxidation, acyl-CoA synthesis	1	-2.85589e-12	1	3	0	0	109	2584
	ko00730	Thiamine metabolism	1	-2.85589e-12	1	3	0	0	109	2584
	M00392	Ski complex	1	-2.85589e-12	1	3	0	0	109	2584
	M00410	ESCRT-II complex	1	-2.85589e-12	1	3	0	0	109	2584
	ko01220	Degradation of aromatic compounds	1	-2.85589e-12	1	3	0	0	109	2584
	ko00780	Biotin metabolism	1	-2.85589e-12	1	3	0	0	109	2584
	dme01220	Degradation of aromatic compounds	1	-2.85589e-12	1	3	0	0	109	2584
	M00051	Uridine monophosphate biosynthesis, glutamine (+ PRPP) => UMP	1	-2.85589e-12	1	3	0	0	109	2584
	M00134	Polyamine biosynthesis, arginine => ornithine => putrescine	1	-2.85589e-12	1	3	0	0	109	2584
	dme_M00410	ESCRT-II complex	1	-2.85589e-12	1	3	0	0	109	2584
	dme00471	D-Glutamine and D-glutamate metabolism	1	-2.85589e-12	1	3	0	0	109	2584
	ko00460	Cyanoamino acid metabolism	1	-2.85589e-12	1	3	0	0	109	2584
	M00015	Proline biosynthesis, glutamate => proline	1	-2.85589e-12	1	3	0	0	109	2584
	M00086	beta-Oxidation, acyl-CoA synthesis	1	-2.85589e-12	1	3	0	0	109	2584
	dme_M00291	MRN complex	1	-2.85589e-12	1	3	0	0	109	2584
	dme_M00392	Ski complex	1	-2.85589e-12	1	3	0	0	109	2584
	dme_M00051	Uridine monophosphate biosynthesis, glutamine (+ PRPP) => UMP	1	-2.85589e-12	1	3	0	0	109	2584
	ko00471	D-Glutamine and D-glutamate metabolism	1	-2.85589e-12	1	3	0	0	109	2584
	dme00460	Cyanoamino acid metabolism	1	-2.85589e-12	1	3	0	0	109	2584
	M00384	Cul3-SPOP complex	1	-2.41326e-12	1	4	0	0	109	2584
	dme00400	Phenylalanine, tyrosine and tryptophan biosynthesis	1	-2.41326e-12	1	4	0	0	109	2584
	M00083	Fatty acid biosynthesis, elongation	1	-2.41326e-12	1	4	0	0	109	2584
	dme_M00263	DNA polymerase epsilon complex	1	-2.41326e-12	1	4	0	0	109	2584
	M00426	Survival motor neuron (SMN) complex	1	-2.41326e-12	1	4	0	0	109	2584
	dme_M00390	Exosome, archaea	1	-2.41326e-12	1	4	0	0	109	2584
	M00263	DNA polymerase epsilon complex	1	-2.41326e-12	1	4	0	0	109	2584
	M00027	GABA (gamma-Aminobutyrate) shunt	1	-2.41326e-12	1	4	0	0	109	2584
	dme00601	Glycosphingolipid biosynthesis - lacto and neolacto series	1	-2.41326e-12	1	4	0	0	109	2584
	M00402	Translocon-associated protein (TRAP) complex	1	-2.41326e-12	1	4	0	0	109	2584
	dme_M00286	GINS complex	1	-2.41326e-12	1	4	0	0	109	2584
	dme_M00425	H/ACA ribonucleoprotein complex	1	-2.41326e-12	1	4	0	0	109	2584
	dme_M00083	Fatty acid biosynthesis, elongation	1	-2.41326e-12	1	4	0	0	109	2584
	ko00533	Glycosaminoglycan biosynthesis - keratan sulfate	1	-2.41326e-12	1	4	0	0	109	2584
	M00401	Sec61 complex	1	-2.41326e-12	1	4	0	0	109	2584
	dme_M00261	DNA polymerase alpha / primase complex	1	-2.41326e-12	1	4	0	0	109	2584
	dme_M00057	Glycosaminoglycan biosynthesis, linkage tetrasaccharide	1	-2.41326e-12	1	4	0	0	109	2584
	ko00400	Phenylalanine, tyrosine and tryptophan biosynthesis	1	-2.41326e-12	1	4	0	0	109	2584
	M00057	Glycosaminoglycan biosynthesis, linkage tetrasaccharide	1	-2.41326e-12	1	4	0	0	109	2584
	dme_M00401	Sec61 complex	1	-2.41326e-12	1	4	0	0	109	2584
	dme00533	Glycosaminoglycan biosynthesis - keratan sulfate	1	-2.41326e-12	1	4	0	0	109	2584
	dme_M00118	Glutathione biosynthesis, glutamate => glutathione	1	-2.41326e-12	1	4	0	0	109	2584
	M00286	GINS complex	1	-2.41326e-12	1	4	0	0	109	2584
	M00425	H/ACA ribonucleoprotein complex	1	-2.41326e-12	1	4	0	0	109	2584
	dme_M00384	Cul3-SPOP complex	1	-2.41326e-12	1	4	0	0	109	2584
	ko00601	Glycosphingolipid biosynthesis - lacto and neolacto series	1	-2.41326e-12	1	4	0	0	109	2584
	M00118	Glutathione biosynthesis, glutamate => glutathione	1	-2.41326e-12	1	4	0	0	109	2584
	M00261	DNA polymerase alpha / primase complex	1	-2.41326e-12	1	4	0	0	109	2584
	dme_M00402	Translocon-associated protein (TRAP) complex	1	-2.41326e-12	1	4	0	0	109	2584
	dme_M00426	Survival motor neuron (SMN) complex	1	-2.41326e-12	1	4	0	0	109	2584
	dme_M00027	GABA (gamma-Aminobutyrate) shunt	1	-2.41326e-12	1	4	0	0	109	2584
	M00390	Exosome, archaea	1	-2.41326e-12	1	4	0	0	109	2584
	ko00232	Caffeine metabolism	1	-2.04475e-12	1	2	0	0	109	2584
	M00293	DNA polymerase zeta complex	1	-2.04475e-12	1	2	0	0	109	2584
	dme00232	Caffeine metabolism	1	-2.04475e-12	1	2	0	0	109	2584
	dme_M00294	DNA polymerase gamma complex	1	-2.04475e-12	1	2	0	0	109	2584
	M00338	Cysteine biosynthesis, homocysteine + serine => cysteine	1	-2.04475e-12	1	2	0	0	109	2584
	dme_M00338	Cysteine biosynthesis, homocysteine + serine => cysteine	1	-2.04475e-12	1	2	0	0	109	2584
	M00554	Nucleotide sugar biosynthesis, galactose => UDP-galactose	1	-2.04475e-12	1	2	0	0	109	2584
	dme_M00293	DNA polymerase zeta complex	1	-2.04475e-12	1	2	0	0	109	2584
	dme_M00554	Nucleotide sugar biosynthesis, galactose => UDP-galactose	1	-2.04475e-12	1	2	0	0	109	2584
	M00294	DNA polymerase gamma complex	1	-2.04475e-12	1	2	0	0	109	2584
	dme_M00007	Pentose phosphate pathway, non-oxidative phase, fructose 6P => ribose 5P	1	-1.2137e-12	1	5	0	0	109	2584
	M00082	Fatty acid biosynthesis, initiation	1	-1.2137e-12	1	5	0	0	109	2584
	M00409	ESCRT-I complex	1	-1.2137e-12	1	5	0	0	109	2584
	M00307	Pyruvate oxidation, pyruvate => acetyl-CoA	1	-1.2137e-12	1	5	0	0	109	2584
	dme_M00082	Fatty acid biosynthesis, initiation	1	-1.2137e-12	1	5	0	0	109	2584
	dme_M00059	Glycosaminoglycan biosynthesis, heparan sulfate backbone	1	-1.2137e-12	1	5	0	0	109	2584
	dme_M00415	Fatty acid biosynthesis, elongation, endoplasmic reticulum	1	-1.2137e-12	1	5	0	0	109	2584
	M00094	Ceramide biosynthesis	1	-1.2137e-12	1	5	0	0	109	2584
	dme_M00409	ESCRT-I complex	1	-1.2137e-12	1	5	0	0	109	2584
	M00405	THC complex	1	-1.2137e-12	1	5	0	0	109	2584
	M00059	Glycosaminoglycan biosynthesis, heparan sulfate backbone	1	-1.2137e-12	1	5	0	0	109	2584
	dme_M00128	Ubiquinone biosynthesis, eukaryotes, 4-hydroxybenzoate => ubiquinone	1	-1.2137e-12	1	5	0	0	109	2584
	M00415	Fatty acid biosynthesis, elongation, endoplasmic reticulum	1	-1.2137e-12	1	5	0	0	109	2584
	M00006	Pentose phosphate pathway, oxidative phase, glucose 6P => ribulose 5P	1	-1.2137e-12	1	5	0	0	109	2584
	dme_M00307	Pyruvate oxidation, pyruvate => acetyl-CoA	1	-1.2137e-12	1	5	0	0	109	2584
	dme_M00006	Pentose phosphate pathway, oxidative phase, glucose 6P => ribulose 5P	1	-1.2137e-12	1	5	0	0	109	2584
	M00007	Pentose phosphate pathway, non-oxidative phase, fructose 6P => ribose 5P	1	-1.2137e-12	1	5	0	0	109	2584
	dme_M00405	THC complex	1	-1.2137e-12	1	5	0	0	109	2584
	M00289	RF-C complex	1	-1.2137e-12	1	5	0	0	109	2584
	M00085	Fatty acid biosynthesis, elongation, mitochondria	1	-1.2137e-12	1	5	0	0	109	2584
	M00128	Ubiquinone biosynthesis, eukaryotes, 4-hydroxybenzoate => ubiquinone	1	-1.2137e-12	1	5	0	0	109	2584
	M00013	Malonate semialdehyde pathway, propanoyl-CoA => Acetyl-CoA	1	-1.2137e-12	1	5	0	0	109	2584
	dme_M00013	Malonate semialdehyde pathway, propanoyl-CoA => Acetyl-CoA	1	-1.2137e-12	1	5	0	0	109	2584
	M00395	Decapping complex	1	-1.2137e-12	1	5	0	0	109	2584
	dme_M00094	Ceramide biosynthesis	1	-1.2137e-12	1	5	0	0	109	2584
	dme_M00085	Fatty acid biosynthesis, elongation, mitochondria	1	-1.2137e-12	1	5	0	0	109	2584
	dme_M00395	Decapping complex	1	-1.2137e-12	1	5	0	0	109	2584
	dme_M00289	RF-C complex	1	-1.2137e-12	1	5	0	0	109	2584
	dme00750	Vitamin B6 metabolism	1	-1.14227e-12	1	6	0	0	109	2584
	ko03450	Non-homologous end-joining	1	-1.14227e-12	1	6	0	0	109	2584
	dme_M00285	MCM complex	1	-1.14227e-12	1	6	0	0	109	2584
	M00383	ECV complex	1	-1.14227e-12	1	6	0	0	109	2584
	dme_M00092	Phosphatidylethanolamine (PE) biosynthesis, ethanolamine => PE	1	-1.14227e-12	1	6	0	0	109	2584
	M00284	Origin recognition complex	1	-1.14227e-12	1	6	0	0	109	2584
	M00092	Phosphatidylethanolamine (PE) biosynthesis, ethanolamine => PE	1	-1.14227e-12	1	6	0	0	109	2584
	M00052	Pyrimidine ribonucleotide biosynthesis, UMP => UDP/UTP,CDP/CTP	1	-1.14227e-12	1	6	0	0	109	2584
	dme03450	Non-homologous end-joining	1	-1.14227e-12	1	6	0	0	109	2584
	M00404	COPII complex	1	-1.14227e-12	1	6	0	0	109	2584
	ko00061	Fatty acid biosynthesis	1	-1.14227e-12	1	6	0	0	109	2584
	dme_M00284	Origin recognition complex	1	-1.14227e-12	1	6	0	0	109	2584
	dme00061	Fatty acid biosynthesis	1	-1.14227e-12	1	6	0	0	109	2584
	dme00604	Glycosphingolipid biosynthesis - ganglio series	1	-1.14227e-12	1	6	0	0	109	2584
	dme_M00404	COPII complex	1	-1.14227e-12	1	6	0	0	109	2584
	M00285	MCM complex	1	-1.14227e-12	1	6	0	0	109	2584
	ko00750	Vitamin B6 metabolism	1	-1.14227e-12	1	6	0	0	109	2584
	dme_M00052	Pyrimidine ribonucleotide biosynthesis, UMP => UDP/UTP,CDP/CTP	1	-1.14227e-12	1	6	0	0	109	2584
	ko00604	Glycosphingolipid biosynthesis - ganglio series	1	-1.14227e-12	1	6	0	0	109	2584
	dme_M00383	ECV complex	1	-1.14227e-12	1	6	0	0	109	2584
	ko00514	Other types of O-glycan biosynthesis	1	-7.78355e-13	1	12	0	0	109	2584
	dme_M00180	RNA polymerase II, eukaryotes	1	-7.78355e-13	1	12	0	0	109	2584
	M00180	RNA polymerase II, eukaryotes	1	-7.78355e-13	1	12	0	0	109	2584
	dme00514	Other types of O-glycan biosynthesis	1	-7.78355e-13	1	12	0	0	109	2584
	M00087	beta-Oxidation	1	-7.78355e-13	1	12	0	0	109	2584
	M00010	Citrate cycle, first carbon oxidation, oxaloacetate => 2-oxoglutarate	1	-7.78355e-13	1	12	0	0	109	2584
	dme_M00087	beta-Oxidation	1	-7.78355e-13	1	12	0	0	109	2584
	dme00592	alpha-Linolenic acid metabolism	1	-7.78355e-13	1	12	0	0	109	2584
	dme00534	Glycosaminoglycan biosynthesis - heparan sulfate / heparin	1	-7.78355e-13	1	12	0	0	109	2584
	dme_M00182	RNA polymerase I, eukaryotes	1	-7.78355e-13	1	12	0	0	109	2584
	M00182	RNA polymerase I, eukaryotes	1	-7.78355e-13	1	12	0	0	109	2584
	dme00062	Fatty acid elongation	1	-7.78355e-13	1	12	0	0	109	2584
	ko00534	Glycosaminoglycan biosynthesis - heparan sulfate / heparin	1	-7.78355e-13	1	12	0	0	109	2584
	ko00592	alpha-Linolenic acid metabolism	1	-7.78355e-13	1	12	0	0	109	2584
	ko00062	Fatty acid elongation	1	-7.78355e-13	1	12	0	0	109	2584
	dme_M00010	Citrate cycle, first carbon oxidation, oxaloacetate => 2-oxoglutarate	1	-7.78355e-13	1	12	0	0	109	2584
	dme_M00072	N-glycosylation by oligosaccharyltransferase	1	-1.12003e-13	1	7	0	0	109	2584
	M00398	Sm core complex	1	-1.12003e-13	1	7	0	0	109	2584
	ko00532	Glycosaminoglycan biosynthesis - chondroitin sulfate / dermatan sulfate	1	-1.12003e-13	1	7	0	0	109	2584
	ko00603	Glycosphingolipid biosynthesis - globo series	1	-1.12003e-13	1	7	0	0	109	2584
	M00397	Lsm 1-7 complex	1	-1.12003e-13	1	7	0	0	109	2584
	M00099	Sphingosine biosynthesis	1	-1.12003e-13	1	7	0	0	109	2584
	M00072	N-glycosylation by oligosaccharyltransferase	1	-1.12003e-13	1	7	0	0	109	2584
	dme_M00099	Sphingosine biosynthesis	1	-1.12003e-13	1	7	0	0	109	2584
	dme_M00148	Succinate dehydrogenase (ubiquinone)	1	-1.12003e-13	1	7	0	0	109	2584
	M00148	Succinate dehydrogenase (ubiquinone)	1	-1.12003e-13	1	7	0	0	109	2584
	M00396	Lsm 2-8 complex	1	-1.12003e-13	1	7	0	0	109	2584
	ko00591	Linoleic acid metabolism	1	-1.12003e-13	1	7	0	0	109	2584
	dme00603	Glycosphingolipid biosynthesis - globo series	1	-1.12003e-13	1	7	0	0	109	2584
	dme00591	Linoleic acid metabolism	1	-1.12003e-13	1	7	0	0	109	2584
	dme_M00398	Sm core complex	1	-1.12003e-13	1	7	0	0	109	2584
	dme_M00396	Lsm 2-8 complex	1	-1.12003e-13	1	7	0	0	109	2584
	dme00532	Glycosaminoglycan biosynthesis - chondroitin sulfate / dermatan sulfate	1	-1.12003e-13	1	7	0	0	109	2584
	dme_M00397	Lsm 1-7 complex	1	-1.12003e-13	1	7	0	0	109	2584
	M00131	Inositol phosphate metabolism, Ins(1,3,4,5)P4 => Ins(1,3,4)P3 => myo-inositol	1	3.24447e-13	1	10	0	0	109	2584
	M00290	Holo-TFIIH complex	1	3.24447e-13	1	10	0	0	109	2584
	dme_M00290	Holo-TFIIH complex	1	3.24447e-13	1	10	0	0	109	2584
	dme_M00131	Inositol phosphate metabolism, Ins(1,3,4,5)P4 => Ins(1,3,4)P3 => myo-inositol	1	3.24447e-13	1	10	0	0	109	2584
	dme04512	ECM-receptor interaction	1	6.91873e-13	1	11	0	0	109	2584
	dme_M00380	SCF-BTRC complex	1	6.91873e-13	1	11	0	0	109	2584
	M00004	Pentose phosphate pathway (Pentose phosphate cycle)	1	6.91873e-13	1	11	0	0	109	2584
	M00387	SCF-FBW7 complex	1	6.91873e-13	1	11	0	0	109	2584
	dme00450	Selenocompound metabolism	1	6.91873e-13	1	11	0	0	109	2584
	M00380	SCF-BTRC complex	1	6.91873e-13	1	11	0	0	109	2584
	M00036	Leucine degradation, leucine => acetoacetate + acetyl-CoA	1	6.91873e-13	1	11	0	0	109	2584
	dme_M00381	SCF-SKP2 complex	1	6.91873e-13	1	11	0	0	109	2584
	M00381	SCF-SKP2 complex	1	6.91873e-13	1	11	0	0	109	2584
	dme_M00036	Leucine degradation, leucine => acetoacetate + acetyl-CoA	1	6.91873e-13	1	11	0	0	109	2584
	ko00450	Selenocompound metabolism	1	6.91873e-13	1	11	0	0	109	2584
	dme_M00387	SCF-FBW7 complex	1	6.91873e-13	1	11	0	0	109	2584
	dme_M00004	Pentose phosphate pathway (Pentose phosphate cycle)	1	6.91873e-13	1	11	0	0	109	2584
	ko04512	ECM-receptor interaction	1	6.91873e-13	1	11	0	0	109	2584
	dme_M00295	BRCA1-associated genome surveillance complex (BASC)	1	1.3446e-12	1	16	0	0	109	2584
	M00295	BRCA1-associated genome surveillance complex (BASC)	1	1.3446e-12	1	16	0	0	109	2584
	M00181	RNA polymerase III, eukaryotes	1	1.3446e-12	1	16	0	0	109	2584
	M00158	F-type ATPase, eukaryotes	1	1.3446e-12	1	16	0	0	109	2584
	dme00531	Glycosaminoglycan degradation	1	1.3446e-12	1	16	0	0	109	2584
	dme_M00158	F-type ATPase, eukaryotes	1	1.3446e-12	1	16	0	0	109	2584
	dme_M00181	RNA polymerase III, eukaryotes	1	1.3446e-12	1	16	0	0	109	2584
	ko00531	Glycosaminoglycan degradation	1	1.3446e-12	1	16	0	0	109	2584
	dme_M00147	NADH dehydrogenase (ubiquinone) 1 beta subcomplex	1	1.94727e-12	1	13	0	0	109	2584
	M00147	NADH dehydrogenase (ubiquinone) 1 beta subcomplex	1	1.94727e-12	1	13	0	0	109	2584
	dme00760	Nicotinate and nicotinamide metabolism	1	1.94727e-12	1	13	0	0	109	2584
	ko00760	Nicotinate and nicotinamide metabolism	1	1.94727e-12	1	13	0	0	109	2584
	ko00590	Arachidonic acid metabolism	1	1.94727e-12	1	13	0	0	109	2584
	dme00590	Arachidonic acid metabolism	1	1.94727e-12	1	13	0	0	109	2584
	dme04711	Circadian rhythm - fly	1	2.45817e-12	1	9	0	0	109	2584
	dme_M00034	Methionine salvage pathway	1	2.45817e-12	1	9	0	0	109	2584
	M00351	Spliceosome, U1-snRNP	1	2.45817e-12	1	9	0	0	109	2584
	M00406	TREX complex	1	2.45817e-12	1	9	0	0	109	2584
	ko04122	Sulfur relay system	1	2.45817e-12	1	9	0	0	109	2584
	M00034	Methionine salvage pathway	1	2.45817e-12	1	9	0	0	109	2584
	M00391	Exosome, eukaryotes	1	2.45817e-12	1	9	0	0	109	2584
	dme_M00351	Spliceosome, U1-snRNP	1	2.45817e-12	1	9	0	0	109	2584
	dme_M00391	Exosome, eukaryotes	1	2.45817e-12	1	9	0	0	109	2584
	dme04122	Sulfur relay system	1	2.45817e-12	1	9	0	0	109	2584
	dme_M00406	TREX complex	1	2.45817e-12	1	9	0	0	109	2584
	ko00472	D-Arginine and D-ornithine metabolism	1	2.47151e-12	1	1	0	0	109	2584
	ko00300	Lysine biosynthesis	1	2.47151e-12	1	1	0	0	109	2584
	dme00300	Lysine biosynthesis	1	2.47151e-12	1	1	0	0	109	2584
	M00005	PRPP biosynthesis, ribose 5P => PRPP	1	2.47151e-12	1	1	0	0	109	2584
	dme_M00005	PRPP biosynthesis, ribose 5P => PRPP	1	2.47151e-12	1	1	0	0	109	2584
	dme00472	D-Arginine and D-ornithine metabolism	1	2.47151e-12	1	1	0	0	109	2584
	M00549	Nucleotide sugar biosynthesis, glucose => UDP-glucose	1	3.10786e-12	1	8	0	0	109	2584
	M00428	eIF4F complex	1	3.10786e-12	1	8	0	0	109	2584
	M00412	ESCRT-III complex	1	3.10786e-12	1	8	0	0	109	2584
	dme_M00412	ESCRT-III complex	1	3.10786e-12	1	8	0	0	109	2584
	dme_M00428	eIF4F complex	1	3.10786e-12	1	8	0	0	109	2584
	dme_M00549	Nucleotide sugar biosynthesis, glucose => UDP-glucose	1	3.10786e-12	1	8	0	0	109	2584
	dme_M00143	NADH dehydrogenase (ubiquinone) Fe-S protein/flavoprotein complex, mitochondria	1	3.29087e-12	1	14	0	0	109	2584
	M00143	NADH dehydrogenase (ubiquinone) Fe-S protein/flavoprotein complex, mitochondria	1	3.29087e-12	1	14	0	0	109	2584
	dme_M00146	NADH dehydrogenase (ubiquinone) 1 alpha subcomplex	1	3.29087e-12	1	14	0	0	109	2584
	M00089	Triacylglycerol biosynthesis	1	3.29087e-12	1	14	0	0	109	2584
	dme_M00089	Triacylglycerol biosynthesis	1	3.29087e-12	1	14	0	0	109	2584
	M00146	NADH dehydrogenase (ubiquinone) 1 alpha subcomplex	1	3.29087e-12	1	14	0	0	109	2584
	ko00565	Ether lipid metabolism	1	4.40293e-12	1	23	0	0	109	2584
	ko00030	Pentose phosphate pathway	1	4.40293e-12	1	23	0	0	109	2584
	dme00565	Ether lipid metabolism	1	4.40293e-12	1	23	0	0	109	2584
	dme00030	Pentose phosphate pathway	1	4.40293e-12	1	23	0	0	109	2584
	M00049	Adenine ribonucleotide biosynthesis, IMP => ADP,ATP	1	4.89981e-12	1	15	0	0	109	2584
	dme00512	Mucin type O-Glycan biosynthesis	1	4.89981e-12	1	15	0	0	109	2584
	ko00512	Mucin type O-Glycan biosynthesis	1	4.89981e-12	1	15	0	0	109	2584
	dme_M00049	Adenine ribonucleotide biosynthesis, IMP => ADP,ATP	1	4.89981e-12	1	15	0	0	109	2584
	dme_M00430	Exon junction complex (EJC)	1	5.07178e-12	1	17	0	0	109	2584
	dme01040	Biosynthesis of unsaturated fatty acids	1	5.07178e-12	1	17	0	0	109	2584
	M00430	Exon junction complex (EJC)	1	5.07178e-12	1	17	0	0	109	2584
	ko01040	Biosynthesis of unsaturated fatty acids	1	5.07178e-12	1	17	0	0	109	2584
	dme_M00154	Cytochrome c oxidase	1	5.2989e-12	1	19	0	0	109	2584
	M00352	Spliceosome, U2-snRNP	1	5.2989e-12	1	19	0	0	109	2584
	M00154	Cytochrome c oxidase	1	5.2989e-12	1	19	0	0	109	2584
	dme_M00352	Spliceosome, U2-snRNP	1	5.2989e-12	1	19	0	0	109	2584
	dme03440	Homologous recombination	1	6.3906e-12	1	20	0	0	109	2584
	dme03410	Base excision repair	1	6.3906e-12	1	20	0	0	109	2584
	ko03430	Mismatch repair	1	6.3906e-12	1	20	0	0	109	2584
	ko03410	Base excision repair	1	6.3906e-12	1	20	0	0	109	2584
	dme03430	Mismatch repair	1	6.3906e-12	1	20	0	0	109	2584
	ko03440	Homologous recombination	1	6.3906e-12	1	20	0	0	109	2584
	dme04013	MAPK signaling pathway - fly	1	6.4585e-12	1	18	0	0	109	2584
	dme01210	2-Oxocarboxylic acid metabolism	1	6.4585e-12	1	18	0	0	109	2584
	ko04013	MAPK signaling pathway - fly	1	6.4585e-12	1	18	0	0	109	2584
	ko01210	2-Oxocarboxylic acid metabolism	1	6.4585e-12	1	18	0	0	109	2584
	dme03020	RNA polymerase	1	6.6102e-12	1	28	0	0	109	2584
	ko03020	RNA polymerase	1	6.6102e-12	1	28	0	0	109	2584
	dme03460	Fanconi anemia pathway	1	7.42652e-12	1	26	0	0	109	2584
	ko03460	Fanconi anemia pathway	1	7.42652e-12	1	26	0	0	109	2584
	ko00790	Folate biosynthesis	1	7.4786e-12	1	24	0	0	109	2584
	dme00790	Folate biosynthesis	1	7.4786e-12	1	24	0	0	109	2584
	ko04340	Hedgehog signaling pathway	1	7.4786e-12	1	24	0	0	109	2584
	dme04340	Hedgehog signaling pathway	1	7.4786e-12	1	24	0	0	109	2584
	dme_M00340	Proteasome, 20S core particle	1	9.14854e-12	1	25	0	0	109	2584
	M00340	Proteasome, 20S core particle	1	9.14854e-12	1	25	0	0	109	2584
	dme_M00160	V-type ATPase, eukaryotes	1	9.18696e-12	1	31	0	0	109	2584
	M00160	V-type ATPase, eukaryotes	1	9.18696e-12	1	31	0	0	109	2584
	ko00830	Retinol metabolism	1	9.18696e-12	1	31	0	0	109	2584
	dme00830	Retinol metabolism	1	9.18696e-12	1	31	0	0	109	2584
	dme04330	Notch signaling pathway	1	9.27833e-12	1	22	0	0	109	2584
	ko04330	Notch signaling pathway	1	9.27833e-12	1	22	0	0	109	2584
	dme_M00341	Proteasome, 19S regulatory particle (PA700)	1	9.27833e-12	1	22	0	0	109	2584
	ko00511	Other glycan degradation	1	9.27833e-12	1	22	0	0	109	2584
	dme00511	Other glycan degradation	1	9.27833e-12	1	22	0	0	109	2584
	M00341	Proteasome, 19S regulatory particle (PA700)	1	9.27833e-12	1	22	0	0	109	2584
	dme00053	Ascorbate and aldarate metabolism	1	9.67228e-12	1	30	0	0	109	2584
	ko00053	Ascorbate and aldarate metabolism	1	9.67228e-12	1	30	0	0	109	2584
	M00354	Spliceosome, U4/U6.U5 tri-snRNP	1	9.67228e-12	1	30	0	0	109	2584
	dme_M00354	Spliceosome, U4/U6.U5 tri-snRNP	1	9.67228e-12	1	30	0	0	109	2584
	ko03420	Nucleotide excision repair	1	1.28221e-11	1	39	0	0	109	2584
	dme03420	Nucleotide excision repair	1	1.28221e-11	1	39	0	0	109	2584
	ko04350	TGF-beta signaling pathway	1	1.37509e-11	1	34	0	0	109	2584
	dme04350	TGF-beta signaling pathway	1	1.37509e-11	1	34	0	0	109	2584
	ko03030	DNA replication	1	1.71767e-11	1	35	0	0	109	2584
	dme03030	DNA replication	1	1.71767e-11	1	35	0	0	109	2584
	dme03050	Proteasome	1	1.87635e-11	1	50	0	0	109	2584
	ko03050	Proteasome	1	1.87635e-11	1	50	0	0	109	2584
	ko03018	RNA degradation	1	1.88701e-11	1	53	0	0	109	2584
	dme03018	RNA degradation	1	1.88701e-11	1	53	0	0	109	2584
	ko00500	Starch and sucrose metabolism	1	1.9289e-11	1	60	0	0	109	2584
	dme00500	Starch and sucrose metabolism	1	1.9289e-11	1	60	0	0	109	2584
	dme00190	Oxidative phosphorylation	1	2.65845e-11	1	126	0	0	109	2584
	ko00190	Oxidative phosphorylation	1	2.65845e-11	1	126	0	0	109	2584

## Sheet: Cl2
Significant Kegg terms	TermID	Term	Enrichment	logP	FDR_BH	Genes in Term	Target Genes in Term	Fraction of Targets in Term	Total Target Genes	Total Genes	Entrez Gene IDs	Gene Symbols
FDR_BH p<0.05	ko04070	Phosphatidylinositol signaling system	0.000190314	-8.56684	0.046437	41	8	0.0754717	106	2584	2.76889e+43	CG42271,CdsA,Pi4KIIalpha,Ipp,inaC,IP3K1,CG34384,PIP5K59B
FDR_BH p<0.05	dme04070	Phosphatidylinositol signaling system	0.000190314	-8.56684	0.046437	41	8	0.0754717	106	2584	2.76889e+43	CG42271,CdsA,Pi4KIIalpha,Ipp,inaC,IP3K1,CG34384,PIP5K59B
Significant Kegg terms	dme04013	MAPK signaling pathway - fly	0.000590874	-7.43391	0.072087	18	5	0.0471698	106	2584	4.31463e+24	boss,aop,tll,csw,sev
Enrichment p<0.01	ko04013	MAPK signaling pathway - fly	0.000590874	-7.43391	0.072087	18	5	0.0471698	106	2584	4.31463e+24	boss,aop,tll,csw,sev
	ko04630	Jak-STAT signaling pathway	0.00100118	-6.90658	0.081429	20	5	0.0471698	106	2584	3.25513e+24	CycD,Socs16D,csw,Cbl,sty
	dme04630	Jak-STAT signaling pathway	0.00100118	-6.90658	0.081429	20	5	0.0471698	106	2584	3.25513e+24	CycD,Socs16D,csw,Cbl,sty
	ko04320	Dorso-ventral axis formation	0.00414509	-5.48583	0.25285	27	5	0.0471698	106	2584	3.33924e+24	aop,enc,aos,aret,rho
	dme04320	Dorso-ventral axis formation	0.00414509	-5.48583	0.25285	27	5	0.0471698	106	2584	3.33924e+24	aop,enc,aos,aret,rho
	M00130	Inositol phosphate metabolism, PI=> PIP2 => Ins(1,4,5)P3 => Ins(1,3,4,5)P4	0.00870427	-4.74394	0.42477	11	3	0.0283019	106	2584	406703430037633	Pi4KIIalpha,IP3K1,PIP5K59B
Enrichment p<0.01	dme_M00130	Inositol phosphate metabolism, PI=> PIP2 => Ins(1,4,5)P3 => Ins(1,3,4,5)P4	0.00870427	-4.74394	0.42477	11	3	0.0283019	106	2584	406703430037633	Pi4KIIalpha,IP3K1,PIP5K59B
	ko00562	Inositol phosphate metabolism	0.0144437	-4.2375	0.58738	36	5	0.0471698	106	2584	2.76889e+26	CG42271,Pi4KIIalpha,Ipp,IP3K1,PIP5K59B
	dme00562	Inositol phosphate metabolism	0.0144437	-4.2375	0.58738	36	5	0.0471698	106	2584	2.76889e+26	CG42271,Pi4KIIalpha,Ipp,IP3K1,PIP5K59B
	dme00564	Glycerophospholipid metabolism	0.0295913	-3.52027	1	58	6	0.0566038	106	2584	3.18994e+31	CG32699,CG11426,CdsA,CG3812,CG34384,Ace
	ko00564	Glycerophospholipid metabolism	0.0295913	-3.52027	1	58	6	0.0566038	106	2584	3.18994e+31	CG32699,CG11426,CdsA,CG3812,CG34384,Ace
	dme04068	FoxO signaling pathway	0.0555565	-2.89036	1	51	5	0.0471698	106	2584	3.25514e+24	CycD,Gadd45,CG10924,slp2,babo
	M00131	Inositol phosphate metabolism, Ins(1,3,4,5)P4 => Ins(1,3,4)P3 => myo-inositol	0.0605057	-2.80502	1	10	2	0.0188679	106	2584	276889241701	CG42271,Ipp
	dme_M00131	Inositol phosphate metabolism, Ins(1,3,4,5)P4 => Ins(1,3,4)P3 => myo-inositol	0.0605057	-2.80502	1	10	2	0.0188679	106	2584	276889241701	CG42271,Ipp
	ko00565	Ether lipid metabolism	0.0654857	-2.72592	1	23	3	0.0283019	106	2584	318994047136669	CG32699,CG11426,CG10253
	dme00565	Ether lipid metabolism	0.0654857	-2.72592	1	23	3	0.0283019	106	2584	318994047136669	CG32699,CG11426,CG10253
	dme04310	Wnt signaling pathway	0.0665259	-2.71016	1	88	7	0.0660377	106	2584	3.25513e+34	CycD,sgg,DAAM,Apc,inaC,CanB,Pka-C1
	ko04310	Wnt signaling pathway	0.0665259	-2.71016	1	88	7	0.0660377	106	2584	3.25513e+34	CycD,sgg,DAAM,Apc,inaC,CanB,Pka-C1
	ko04340	Hedgehog signaling pathway	0.0726865	-2.6216	1	24	3	0.0283019	106	2584	312484970134284	sgg,gish,Pka-C1
	dme04340	Hedgehog signaling pathway	0.0726865	-2.6216	1	24	3	0.0283019	106	2584	312484970134284	sgg,gish,Pka-C1
	ko04080	Neuroactive ligand-receptor interaction	0.103713	-2.26613	1	44	4	0.0377358	106	2584	3.11074e+19	Nmdar2,Rdl,GABA-B-R1,GABA-B-R2
	dme04080	Neuroactive ligand-receptor interaction	0.103713	-2.26613	1	44	4	0.0377358	106	2584	3.11074e+19	Nmdar2,Rdl,GABA-B-R1,GABA-B-R2
	M00089	Triacylglycerol biosynthesis	0.110109	-2.20628	1	14	2	0.0188679	106	2584	4047132230	CG11426,CG3812
	dme_M00089	Triacylglycerol biosynthesis	0.110109	-2.20628	1	14	2	0.0188679	106	2584	4047132230	CG11426,CG3812
	dme_M00058	Glycosaminoglycan biosynthesis, chondroitin sulfate backbone	0.11813	-2.13597	1	3	1	0.00943396	106	2584	36079	CG12913
	M00058	Glycosaminoglycan biosynthesis, chondroitin sulfate backbone	0.11813	-2.13597	1	3	1	0.00943396	106	2584	36079	CG12913
	dme_M00086	beta-Oxidation, acyl-CoA synthesis	0.11813	-2.13597	1	3	1	0.00943396	106	2584	40056	CG3961
	M00086	beta-Oxidation, acyl-CoA synthesis	0.11813	-2.13597	1	3	1	0.00943396	106	2584	40056	CG3961
	dme00531	Glycosaminoglycan degradation	0.137818	-1.98182	1	16	2	0.0188679	106	2584	3719738423	CG15117,CG12014
	ko00531	Glycosaminoglycan degradation	0.137818	-1.98182	1	16	2	0.0188679	106	2584	3719738423	CG15117,CG12014
	ko04144	Endocytosis	0.144037	-1.93769	1	87	6	0.0566038	106	2584	3.59003e+29	babo,Rab5,Cbl,Src64B,Rip11,PIP5K59B
	dme04144	Endocytosis	0.144037	-1.93769	1	87	6	0.0566038	106	2584	3.59003e+29	babo,Rab5,Cbl,Src64B,Rip11,PIP5K59B
	M00384	Cul3-SPOP complex	0.154347	-1.86855	1	4	1	0.00943396	106	2584	41704	rdx
	dme00601	Glycosphingolipid biosynthesis - lacto and neolacto series	0.154347	-1.86855	1	4	1	0.00943396	106	2584	37861	CG3253
	ko00533	Glycosaminoglycan biosynthesis - keratan sulfate	0.154347	-1.86855	1	4	1	0.00943396	106	2584	37861	CG3253
	dme00533	Glycosaminoglycan biosynthesis - keratan sulfate	0.154347	-1.86855	1	4	1	0.00943396	106	2584	37861	CG3253
	dme_M00384	Cul3-SPOP complex	0.154347	-1.86855	1	4	1	0.00943396	106	2584	41704	rdx
	ko00601	Glycosphingolipid biosynthesis - lacto and neolacto series	0.154347	-1.86855	1	4	1	0.00943396	106	2584	37861	CG3253
	dme04142	Lysosome	0.161352	-1.82417	1	90	6	0.0566038	106	2584	3.54053e+29	Tsp39D,Npc2a,g,CG15117,Vha100-1,CG12014
	ko04142	Lysosome	0.161352	-1.82417	1	90	6	0.0566038	106	2584	3.54053e+29	Tsp39D,Npc2a,g,CG15117,Vha100-1,CG12014
	ko04140	Regulation of autophagy	0.166849	-1.79066	1	18	2	0.0188679	106	2584	4111241096	CG8866,ird1
	dme04140	Regulation of autophagy	0.166849	-1.79066	1	18	2	0.0188679	106	2584	4111241096	CG8866,ird1
	ko04150	mTOR signaling pathway	0.181539	-1.70628	1	36	3	0.0283019	106	2584	411124342236897	CG8866,eIF4E-6,inaC
	dme04150	mTOR signaling pathway	0.181539	-1.70628	1	36	3	0.0283019	106	2584	411124342236897	CG8866,eIF4E-6,inaC
	M00073	N-glycan precursor trimming	0.189091	-1.66553	1	5	1	0.00943396	106	2584	318624	CG31202
	M00405	THC complex	0.189091	-1.66553	1	5	1	0.00943396	106	2584	37810	thoc5
	dme_M00405	THC complex	0.189091	-1.66553	1	5	1	0.00943396	106	2584	37810	thoc5
	dme_M00073	N-glycan precursor trimming	0.189091	-1.66553	1	5	1	0.00943396	106	2584	318624	CG31202
	dme04330	Notch signaling pathway	0.227385	-1.48111	1	22	2	0.0188679	106	2584	3655543558	mam,Tace
	ko04330	Notch signaling pathway	0.227385	-1.48111	1	22	2	0.0188679	106	2584	3655543558	mam,Tace
	dme_M00341	Proteasome, 19S regulatory particle (PA700)	0.227385	-1.48111	1	22	2	0.0188679	106	2584	3935141190	Rpt4R,Rpt3R
	M00341	Proteasome, 19S regulatory particle (PA700)	0.227385	-1.48111	1	22	2	0.0188679	106	2584	3935141190	Rpt4R,Rpt3R
	ko00532	Glycosaminoglycan biosynthesis - chondroitin sulfate / dermatan sulfate	0.254392	-1.36888	1	7	1	0.00943396	106	2584	36079	CG12913
	dme00532	Glycosaminoglycan biosynthesis - chondroitin sulfate / dermatan sulfate	0.254392	-1.36888	1	7	1	0.00943396	106	2584	36079	CG12913
	dme00561	Glycerolipid metabolism	0.268994	-1.31307	1	44	3	0.0283019	106	2584	4.04713e+16	CG11426,CG3812,CG34384
	ko00561	Glycerolipid metabolism	0.268994	-1.31307	1	44	3	0.0283019	106	2584	4.04713e+16	CG11426,CG3812,CG34384
	M00428	eIF4F complex	0.285062	-1.25505	1	8	1	0.00943396	106	2584	43422	eIF4E-6
	dme_M00428	eIF4F complex	0.285062	-1.25505	1	8	1	0.00943396	106	2584	43422	eIF4E-6
	dme04745	Phototransduction - fly	0.30466	-1.18856	1	27	2	0.0188679	106	2584	4022436897	rdgC,inaC
	ko04745	Phototransduction - fly	0.30466	-1.18856	1	27	2	0.0188679	106	2584	4022436897	rdgC,inaC
	dme04711	Circadian rhythm - fly	0.314481	-1.15683	1	9	1	0.00943396	106	2584	31248	sgg
	M00406	TREX complex	0.314481	-1.15683	1	9	1	0.00943396	106	2584	37810	thoc5
	dme_M00406	TREX complex	0.314481	-1.15683	1	9	1	0.00943396	106	2584	37810	thoc5
	ko00260	Glycine, serine and threonine metabolism	0.320038	-1.13932	1	28	2	0.0188679	106	2584	3241832420	CG9514,CG9509
	ko00600	Sphingolipid metabolism	0.320038	-1.13932	1	28	2	0.0188679	106	2584	4047137516	CG11426,GlcT-1
	dme00600	Sphingolipid metabolism	0.320038	-1.13932	1	28	2	0.0188679	106	2584	4047137516	CG11426,GlcT-1
	dme00260	Glycine, serine and threonine metabolism	0.320038	-1.13932	1	28	2	0.0188679	106	2584	3241832420	CG9514,CG9509
	ko04145	Phagosome	0.360848	-1.0193	1	74	4	0.0377358	106	2584	4.34424e+19	Vha100-1,betaTub60D,Rab5,VhaM9.7-a
	dme04145	Phagosome	0.360848	-1.0193	1	74	4	0.0377358	106	2584	4.34424e+19	Vha100-1,betaTub60D,Rab5,VhaM9.7-a
	dme_M00160	V-type ATPase, eukaryotes	0.365621	-1.00616	1	31	2	0.0188679	106	2584	4344238521	Vha100-1,VhaM9.7-a
	M00160	V-type ATPase, eukaryotes	0.365621	-1.00616	1	31	2	0.0188679	106	2584	4344238521	Vha100-1,VhaM9.7-a
	ko04350	TGF-beta signaling pathway	0.410024	-0.89154	1	34	2	0.0188679	106	2584	3590043826	babo,Actbeta
	dme04350	TGF-beta signaling pathway	0.410024	-0.89154	1	34	2	0.0188679	106	2584	3590043826	babo,Actbeta
	ko04391	Hippo signaling pathway - fly	0.416818	-0.875105	1	57	3	0.0283019	106	2584	4486142896326190	sdt,crb,Krn
	dme04391	Hippo signaling pathway - fly	0.416818	-0.875105	1	57	3	0.0283019	106	2584	4486142896326190	sdt,crb,Krn
	dme_M00055	N-glycan precursor biosynthesis	0.420636	-0.865988	1	13	1	0.00943396	106	2584	34409	gny
	M00055	N-glycan precursor biosynthesis	0.420636	-0.865988	1	13	1	0.00943396	106	2584	34409	gny
	dme_M00050	Guanine ribonucleotide biosynthesis IMP => GDP,GTP	0.420636	-0.865988	1	13	1	0.00943396	106	2584	40409	CG11249
	M00050	Guanine ribonucleotide biosynthesis IMP => GDP,GTP	0.420636	-0.865988	1	13	1	0.00943396	106	2584	40409	CG11249
	ko00981	Insect hormone biosynthesis	0.444522	-0.810755	1	14	1	0.00943396	106	2584	32423	Eo
	dme_M00003	Gluconeogenesis, oxaloacetate => fructose-6P	0.444522	-0.810755	1	14	1	0.00943396	106	2584	37130	CG10924
	dme00981	Insect hormone biosynthesis	0.444522	-0.810755	1	14	1	0.00943396	106	2584	32423	Eo
	M00003	Gluconeogenesis, oxaloacetate => fructose-6P	0.444522	-0.810755	1	14	1	0.00943396	106	2584	37130	CG10924
	ko00510	N-Glycan biosynthesis	0.452889	-0.792107	1	37	2	0.0188679	106	2584	31862434409	CG31202,gny
	dme00510	N-Glycan biosynthesis	0.452889	-0.792107	1	37	2	0.0188679	106	2584	31862434409	CG31202,gny
	M00049	Adenine ribonucleotide biosynthesis, IMP => ADP,ATP	0.467433	-0.760499	1	15	1	0.00943396	106	2584	40409	CG11249
	M00389	APC/C complex	0.467433	-0.760499	1	15	1	0.00943396	106	2584	45922	rap
	dme_M00389	APC/C complex	0.467433	-0.760499	1	15	1	0.00943396	106	2584	45922	rap
	dme00512	Mucin type O-Glycan biosynthesis	0.467433	-0.760499	1	15	1	0.00943396	106	2584	39715	pgant8
	ko00512	Mucin type O-Glycan biosynthesis	0.467433	-0.760499	1	15	1	0.00943396	106	2584	39715	pgant8
	dme_M00002	Glycolysis, core module involving three-carbon compounds	0.467433	-0.760499	1	15	1	0.00943396	106	2584	40409	CG11249
	dme_M00049	Adenine ribonucleotide biosynthesis, IMP => ADP,ATP	0.467433	-0.760499	1	15	1	0.00943396	106	2584	40409	CG11249
	M00002	Glycolysis, core module involving three-carbon compounds	0.467433	-0.760499	1	15	1	0.00943396	106	2584	40409	CG11249
	M00177	Ribosome, eukaryotes	0.500731	-0.691687	1	89	4	0.0377358	106	2584	3.94804e+19	RpS12,RpS19b,RpS9,RpS10a
	dme_M00177	Ribosome, eukaryotes	0.500731	-0.691687	1	89	4	0.0377358	106	2584	3.94804e+19	RpS12,RpS19b,RpS9,RpS10a
	ko00350	Tyrosine metabolism	0.530697	-0.633564	1	18	1	0.00943396	106	2584	31718	Tbh
	dme00900	Terpenoid backbone biosynthesis	0.530697	-0.633564	1	18	1	0.00943396	106	2584	38816	qm
	dme00350	Tyrosine metabolism	0.530697	-0.633564	1	18	1	0.00943396	106	2584	31718	Tbh
	ko00900	Terpenoid backbone biosynthesis	0.530697	-0.633564	1	18	1	0.00943396	106	2584	38816	qm
	dme00563	Glycosylphosphatidylinositol(GPI)-anchor biosynthesis	0.550084	-0.597685	1	19	1	0.00943396	106	2584	40139	CG9376
	ko00563	Glycosylphosphatidylinositol(GPI)-anchor biosynthesis	0.550084	-0.597685	1	19	1	0.00943396	106	2584	40139	CG9376
	ko04120	Ubiquitin mediated proteolysis	0.578375	-0.547532	1	98	4	0.0377358	106	2584	4.02494e+19	RhoBTB,CG5087,Cbl,rap
	dme04120	Ubiquitin mediated proteolysis	0.578375	-0.547532	1	98	4	0.0377358	106	2584	4.02494e+19	RhoBTB,CG5087,Cbl,rap
	ko00511	Other glycan degradation	0.60361	-0.504828	1	22	1	0.00943396	106	2584	41913	alpha-Man-IIb
	dme00511	Other glycan degradation	0.60361	-0.504828	1	22	1	0.00943396	106	2584	41913	alpha-Man-IIb
	dme03050	Proteasome	0.616106	-0.484337	1	50	2	0.0188679	106	2584	3935141190	Rpt4R,Rpt3R
	ko03050	Proteasome	0.616106	-0.484337	1	50	2	0.0188679	106	2584	3935141190	Rpt4R,Rpt3R
	dme00620	Pyruvate metabolism	0.616106	-0.484337	1	50	2	0.0188679	106	2584	3713040409	CG10924,CG11249
	ko00620	Pyruvate metabolism	0.616106	-0.484337	1	50	2	0.0188679	106	2584	3713040409	CG10924,CG11249
	ko00030	Pentose phosphate pathway	0.62001	-0.47802	1	23	1	0.00943396	106	2584	32422	CG12398
	dme00030	Pentose phosphate pathway	0.62001	-0.47802	1	23	1	0.00943396	106	2584	32422	CG12398
	ko00010	Glycolysis / Gluconeogenesis	0.627014	-0.466787	1	51	2	0.0188679	106	2584	3713040409	CG10924,CG11249
	dme00010	Glycolysis / Gluconeogenesis	0.627014	-0.466787	1	51	2	0.0188679	106	2584	3713040409	CG10924,CG11249
	M00001	Glycolysis (Embden-Meyerhof pathway), glucose => pyruvate	0.635738	-0.452969	1	24	1	0.00943396	106	2584	40409	CG11249
	dme_M00001	Glycolysis (Embden-Meyerhof pathway), glucose => pyruvate	0.635738	-0.452969	1	24	1	0.00943396	106	2584	40409	CG11249
	dme03460	Fanconi anemia pathway	0.665284	-0.407541	1	26	1	0.00943396	106	2584	40965	DNApol-iota
	ko03460	Fanconi anemia pathway	0.665284	-0.407541	1	26	1	0.00943396	106	2584	40965	DNApol-iota
	ko00500	Starch and sucrose metabolism	0.71463	-0.33599	1	60	2	0.0188679	106	2584	3719743072	CG15117,tobi
	dme00500	Starch and sucrose metabolism	0.71463	-0.33599	1	60	2	0.0188679	106	2584	3719743072	CG15117,tobi
	dme00071	Fatty acid degradation	0.717439	-0.332067	1	30	1	0.00943396	106	2584	40056	CG3961
	ko00071	Fatty acid degradation	0.717439	-0.332067	1	30	1	0.00943396	106	2584	40056	CG3961
	ko04141	Protein processing in endoplasmic reticulum	0.77082	-0.260301	1	126	4	0.0377358	106	2584	3.17834e+21	CG32039,CG31202,Ire1,CG4603
	dme04141	Protein processing in endoplasmic reticulum	0.77082	-0.260301	1	126	4	0.0377358	106	2584	3.17834e+21	CG32039,CG31202,Ire1,CG4603
	dme_M00014	Glucuronate pathway (uronate pathway)	0.771445	-0.25949	1	35	1	0.00943396	106	2584	37197	CG15117
	ko00052	Galactose metabolism	0.771445	-0.25949	1	35	1	0.00943396	106	2584	43072	tobi
	dme00052	Galactose metabolism	0.771445	-0.25949	1	35	1	0.00943396	106	2584	43072	tobi
	M00014	Glucuronate pathway (uronate pathway)	0.771445	-0.25949	1	35	1	0.00943396	106	2584	37197	CG15117
	dme04146	Peroxisome	0.777538	-0.251623	1	68	2	0.0188679	106	2584	3666940056	CG10253,CG3961
	ko04146	Peroxisome	0.777538	-0.251623	1	68	2	0.0188679	106	2584	3666940056	CG10253,CG3961
	M00359	Aminoacyl-tRNA biosynthesis, eukaryotes	0.780949	-0.247245	1	36	1	0.00943396	106	2584	39023	CG5660
	dme_M00359	Aminoacyl-tRNA biosynthesis, eukaryotes	0.780949	-0.247245	1	36	1	0.00943396	106	2584	39023	CG5660
	ko03015	mRNA surveillance pathway	0.791262	-0.234126	1	70	2	0.0188679	106	2584	3991943087	Rbp6,msi
	dme03015	mRNA surveillance pathway	0.791262	-0.234126	1	70	2	0.0188679	106	2584	3991943087	Rbp6,msi
	dme00230	Purine metabolism	0.79683	-0.227114	1	131	4	0.0377358	106	2584	4.36823e+20	Gycbeta100B,Gyc32E,CG11249,Apf
	ko03010	Ribosome	0.79683	-0.227114	1	131	4	0.0377358	106	2584	3.94804e+19	RpS12,RpS19b,RpS9,RpS10a
	ko00230	Purine metabolism	0.79683	-0.227114	1	131	4	0.0377358	106	2584	4.36823e+20	Gycbeta100B,Gyc32E,CG11249,Apf
	dme03010	Ribosome	0.79683	-0.227114	1	131	4	0.0377358	106	2584	3.94804e+19	RpS12,RpS19b,RpS9,RpS10a
	ko03022	Basal transcription factors	0.807176	-0.214213	1	39	1	0.00943396	106	2584	43793	bip2
	dme03022	Basal transcription factors	0.807176	-0.214213	1	39	1	0.00943396	106	2584	43793	bip2
	ko01212	Fatty acid metabolism	0.822907	-0.194912	1	41	1	0.00943396	106	2584	40056	CG3961
	dme01212	Fatty acid metabolism	0.822907	-0.194912	1	41	1	0.00943396	106	2584	40056	CG3961
	dme00970	Aminoacyl-tRNA biosynthesis	0.830289	-0.185982	1	42	1	0.00943396	106	2584	39023	CG5660
	ko00970	Aminoacyl-tRNA biosynthesis	0.830289	-0.185982	1	42	1	0.00943396	106	2584	39023	CG5660
	ko03013	RNA transport	0.83352	-0.182097	1	139	4	0.0377358	106	2584	4.18614e+19	Sra-1,thoc5,Ef1alpha100E,eIF4E-6
	dme03013	RNA transport	0.83352	-0.182097	1	139	4	0.0377358	106	2584	4.18614e+19	Sra-1,thoc5,Ef1alpha100E,eIF4E-6
	dme00860	Porphyrin and chlorophyll metabolism	0.837366	-0.177494	1	43	1	0.00943396	106	2584	37197	CG15117
	ko00860	Porphyrin and chlorophyll metabolism	0.837366	-0.177494	1	43	1	0.00943396	106	2584	37197	CG15117
	ko00020	Citrate cycle (TCA cycle)	0.837366	-0.177494	1	43	1	0.00943396	106	2584	37130	CG10924
	dme00020	Citrate cycle (TCA cycle)	0.837366	-0.177494	1	43	1	0.00943396	106	2584	37130	CG10924
	ko00040	Pentose and glucuronate interconversions	0.850654	-0.16175	1	45	1	0.00943396	106	2584	37197	CG15117
	dme00040	Pentose and glucuronate interconversions	0.850654	-0.16175	1	45	1	0.00943396	106	2584	37197	CG15117
	ko00983	Drug metabolism - other enzymes	0.862866	-0.147496	1	47	1	0.00943396	106	2584	37197	CG15117
	dme00983	Drug metabolism - other enzymes	0.862866	-0.147496	1	47	1	0.00943396	106	2584	37197	CG15117
	dme00330	Arginine and proline metabolism	0.893875	-0.11219	1	53	1	0.00943396	106	2584	39040	CG5144
	ko00330	Arginine and proline metabolism	0.893875	-0.11219	1	53	1	0.00943396	106	2584	39040	CG5144
	dme00480	Glutathione metabolism	0.930868	-0.0716375	1	63	1	0.00943396	106	2584	43444	CG14516
	ko00480	Glutathione metabolism	0.930868	-0.0716375	1	63	1	0.00943396	106	2584	43444	CG14516
	dme01230	Biosynthesis of amino acids	0.933775	-0.0685197	1	64	1	0.00943396	106	2584	40409	CG11249
	ko01230	Biosynthesis of amino acids	0.933775	-0.0685197	1	64	1	0.00943396	106	2584	40409	CG11249
	dme03040	Spliceosome	0.969103	-0.0313841	1	125	2	0.0188679	106	2584	3852038756	CG11586,CG10077
	ko03040	Spliceosome	0.969103	-0.0313841	1	125	2	0.0188679	106	2584	3852038756	CG11586,CG10077
	dme00240	Pyrimidine metabolism	0.969527	-0.0309473	1	82	1	0.00943396	106	2584	318908	Apf
	ko00240	Pyrimidine metabolism	0.969527	-0.0309473	1	82	1	0.00943396	106	2584	318908	Apf
	dme00190	Oxidative phosphorylation	0.970224	-0.0302287	1	126	2	0.0188679	106	2584	4344238521	Vha100-1,VhaM9.7-a
	ko00190	Oxidative phosphorylation	0.970224	-0.0302287	1	126	2	0.0188679	106	2584	4344238521	Vha100-1,VhaM9.7-a
	ko01200	Carbon metabolism	0.988791	-0.0112719	1	105	1	0.00943396	106	2584	40409	CG11249
	dme01200	Carbon metabolism	0.988791	-0.0112719	1	105	1	0.00943396	106	2584	40409	CG11249
	M00400	p97-Ufd1-Npl4 complex	1	-4.72e-12	1	3	0	0	106	2584
	dme00780	Biotin metabolism	1	-4.72e-12	1	3	0	0	106	2584
	ko00785	Lipoic acid metabolism	1	-4.72e-12	1	3	0	0	106	2584
	dme_M00288	RPA complex	1	-4.72e-12	1	3	0	0	106	2584
	M00288	RPA complex	1	-4.72e-12	1	3	0	0	106	2584
	dme_M00151	Cytochrome bc1 complex respiratory unit	1	-4.72e-12	1	3	0	0	106	2584
	M00141	C1-unit interconversion, eukaryotes	1	-4.72e-12	1	3	0	0	106	2584
	dme_M00015	Proline biosynthesis, glutamate => proline	1	-4.72e-12	1	3	0	0	106	2584
	M00399	Cap binding complex	1	-4.72e-12	1	3	0	0	106	2584
	M00291	MRN complex	1	-4.72e-12	1	3	0	0	106	2584
	dme_M00400	p97-Ufd1-Npl4 complex	1	-4.72e-12	1	3	0	0	106	2584
	dme00785	Lipoic acid metabolism	1	-4.72e-12	1	3	0	0	106	2584
	M00046	Pyrimidine degradation, uracil => beta-alanine, thymine => 3-aminoisobutanoate	1	-4.72e-12	1	3	0	0	106	2584
	dme00730	Thiamine metabolism	1	-4.72e-12	1	3	0	0	106	2584
	dme_M00134	Polyamine biosynthesis, arginine => ornithine => putrescine	1	-4.72e-12	1	3	0	0	106	2584
	dme_M00399	Cap binding complex	1	-4.72e-12	1	3	0	0	106	2584
	M00151	Cytochrome bc1 complex respiratory unit	1	-4.72e-12	1	3	0	0	106	2584
	ko00730	Thiamine metabolism	1	-4.72e-12	1	3	0	0	106	2584
	dme_M00046	Pyrimidine degradation, uracil => beta-alanine, thymine => 3-aminoisobutanoate	1	-4.72e-12	1	3	0	0	106	2584
	M00392	Ski complex	1	-4.72e-12	1	3	0	0	106	2584
	M00410	ESCRT-II complex	1	-4.72e-12	1	3	0	0	106	2584
	ko01220	Degradation of aromatic compounds	1	-4.72e-12	1	3	0	0	106	2584
	ko00780	Biotin metabolism	1	-4.72e-12	1	3	0	0	106	2584
	dme01220	Degradation of aromatic compounds	1	-4.72e-12	1	3	0	0	106	2584
	M00051	Uridine monophosphate biosynthesis, glutamine (+ PRPP) => UMP	1	-4.72e-12	1	3	0	0	106	2584
	M00134	Polyamine biosynthesis, arginine => ornithine => putrescine	1	-4.72e-12	1	3	0	0	106	2584
	dme_M00020	Serine biosynthesis, glycerate-3P => serine	1	-4.72e-12	1	3	0	0	106	2584
	dme_M00141	C1-unit interconversion, eukaryotes	1	-4.72e-12	1	3	0	0	106	2584
	dme_M00410	ESCRT-II complex	1	-4.72e-12	1	3	0	0	106	2584
	dme00471	D-Glutamine and D-glutamate metabolism	1	-4.72e-12	1	3	0	0	106	2584
	M00020	Serine biosynthesis, glycerate-3P => serine	1	-4.72e-12	1	3	0	0	106	2584
	ko00460	Cyanoamino acid metabolism	1	-4.72e-12	1	3	0	0	106	2584
	M00015	Proline biosynthesis, glutamate => proline	1	-4.72e-12	1	3	0	0	106	2584
	dme_M00291	MRN complex	1	-4.72e-12	1	3	0	0	106	2584
	dme_M00392	Ski complex	1	-4.72e-12	1	3	0	0	106	2584
	dme_M00051	Uridine monophosphate biosynthesis, glutamine (+ PRPP) => UMP	1	-4.72e-12	1	3	0	0	106	2584
	ko00471	D-Glutamine and D-glutamate metabolism	1	-4.72e-12	1	3	0	0	106	2584
	dme00460	Cyanoamino acid metabolism	1	-4.72e-12	1	3	0	0	106	2584
	dme_M00007	Pentose phosphate pathway, non-oxidative phase, fructose 6P => ribose 5P	1	-3.49e-12	1	5	0	0	106	2584
	M00082	Fatty acid biosynthesis, initiation	1	-3.49e-12	1	5	0	0	106	2584
	M00409	ESCRT-I complex	1	-3.49e-12	1	5	0	0	106	2584
	M00307	Pyruvate oxidation, pyruvate => acetyl-CoA	1	-3.49e-12	1	5	0	0	106	2584
	dme_M00082	Fatty acid biosynthesis, initiation	1	-3.49e-12	1	5	0	0	106	2584
	dme_M00059	Glycosaminoglycan biosynthesis, heparan sulfate backbone	1	-3.49e-12	1	5	0	0	106	2584
	dme_M00415	Fatty acid biosynthesis, elongation, endoplasmic reticulum	1	-3.49e-12	1	5	0	0	106	2584
	M00094	Ceramide biosynthesis	1	-3.49e-12	1	5	0	0	106	2584
	dme_M00409	ESCRT-I complex	1	-3.49e-12	1	5	0	0	106	2584
	M00059	Glycosaminoglycan biosynthesis, heparan sulfate backbone	1	-3.49e-12	1	5	0	0	106	2584
	dme_M00128	Ubiquinone biosynthesis, eukaryotes, 4-hydroxybenzoate => ubiquinone	1	-3.49e-12	1	5	0	0	106	2584
	M00415	Fatty acid biosynthesis, elongation, endoplasmic reticulum	1	-3.49e-12	1	5	0	0	106	2584
	M00006	Pentose phosphate pathway, oxidative phase, glucose 6P => ribulose 5P	1	-3.49e-12	1	5	0	0	106	2584
	dme_M00120	Coenzyme A biosynthesis, pantothenate => CoA	1	-3.49e-12	1	5	0	0	106	2584
	dme_M00307	Pyruvate oxidation, pyruvate => acetyl-CoA	1	-3.49e-12	1	5	0	0	106	2584
	dme_M00006	Pentose phosphate pathway, oxidative phase, glucose 6P => ribulose 5P	1	-3.49e-12	1	5	0	0	106	2584
	M00007	Pentose phosphate pathway, non-oxidative phase, fructose 6P => ribose 5P	1	-3.49e-12	1	5	0	0	106	2584
	M00289	RF-C complex	1	-3.49e-12	1	5	0	0	106	2584
	M00085	Fatty acid biosynthesis, elongation, mitochondria	1	-3.49e-12	1	5	0	0	106	2584
	M00128	Ubiquinone biosynthesis, eukaryotes, 4-hydroxybenzoate => ubiquinone	1	-3.49e-12	1	5	0	0	106	2584
	M00013	Malonate semialdehyde pathway, propanoyl-CoA => Acetyl-CoA	1	-3.49e-12	1	5	0	0	106	2584
	dme_M00013	Malonate semialdehyde pathway, propanoyl-CoA => Acetyl-CoA	1	-3.49e-12	1	5	0	0	106	2584
	M00395	Decapping complex	1	-3.49e-12	1	5	0	0	106	2584
	dme_M00094	Ceramide biosynthesis	1	-3.49e-12	1	5	0	0	106	2584
	dme_M00085	Fatty acid biosynthesis, elongation, mitochondria	1	-3.49e-12	1	5	0	0	106	2584
	M00120	Coenzyme A biosynthesis, pantothenate => CoA	1	-3.49e-12	1	5	0	0	106	2584
	dme_M00395	Decapping complex	1	-3.49e-12	1	5	0	0	106	2584
	dme_M00289	RF-C complex	1	-3.49e-12	1	5	0	0	106	2584
	ko00232	Caffeine metabolism	1	-3.09e-12	1	2	0	0	106	2584
	ko00290	Valine, leucine and isoleucine biosynthesis	1	-3.09e-12	1	2	0	0	106	2584
	M00293	DNA polymerase zeta complex	1	-3.09e-12	1	2	0	0	106	2584
	dme00290	Valine, leucine and isoleucine biosynthesis	1	-3.09e-12	1	2	0	0	106	2584
	dme00232	Caffeine metabolism	1	-3.09e-12	1	2	0	0	106	2584
	M00408	ESCRT-0 complex	1	-3.09e-12	1	2	0	0	106	2584
	dme_M00294	DNA polymerase gamma complex	1	-3.09e-12	1	2	0	0	106	2584
	dme00100	Steroid biosynthesis	1	-3.09e-12	1	2	0	0	106	2584
	M00338	Cysteine biosynthesis, homocysteine + serine => cysteine	1	-3.09e-12	1	2	0	0	106	2584
	dme_M00338	Cysteine biosynthesis, homocysteine + serine => cysteine	1	-3.09e-12	1	2	0	0	106	2584
	M00100	Sphingosine degradation	1	-3.09e-12	1	2	0	0	106	2584
	ko00100	Steroid biosynthesis	1	-3.09e-12	1	2	0	0	106	2584
	M00554	Nucleotide sugar biosynthesis, galactose => UDP-galactose	1	-3.09e-12	1	2	0	0	106	2584
	dme_M00100	Sphingosine degradation	1	-3.09e-12	1	2	0	0	106	2584
	dme_M00293	DNA polymerase zeta complex	1	-3.09e-12	1	2	0	0	106	2584
	dme_M00408	ESCRT-0 complex	1	-3.09e-12	1	2	0	0	106	2584
	dme_M00554	Nucleotide sugar biosynthesis, galactose => UDP-galactose	1	-3.09e-12	1	2	0	0	106	2584
	M00294	DNA polymerase gamma complex	1	-3.09e-12	1	2	0	0	106	2584
	dme_M00072	N-glycosylation by oligosaccharyltransferase	1	-2.61e-12	1	7	0	0	106	2584
	dme00430	Taurine and hypotaurine metabolism	1	-2.61e-12	1	7	0	0	106	2584
	M00398	Sm core complex	1	-2.61e-12	1	7	0	0	106	2584
	ko00603	Glycosphingolipid biosynthesis - globo series	1	-2.61e-12	1	7	0	0	106	2584
	M00397	Lsm 1-7 complex	1	-2.61e-12	1	7	0	0	106	2584
	dme00072	Synthesis and degradation of ketone bodies	1	-2.61e-12	1	7	0	0	106	2584
	M00099	Sphingosine biosynthesis	1	-2.61e-12	1	7	0	0	106	2584
	M00072	N-glycosylation by oligosaccharyltransferase	1	-2.61e-12	1	7	0	0	106	2584
	dme_M00099	Sphingosine biosynthesis	1	-2.61e-12	1	7	0	0	106	2584
	dme_M00148	Succinate dehydrogenase (ubiquinone)	1	-2.61e-12	1	7	0	0	106	2584
	M00048	Inosine monophosphate biosynthesis, PRPP + glutamine => IMP	1	-2.61e-12	1	7	0	0	106	2584
	dme_M00048	Inosine monophosphate biosynthesis, PRPP + glutamine => IMP	1	-2.61e-12	1	7	0	0	106	2584
	M00148	Succinate dehydrogenase (ubiquinone)	1	-2.61e-12	1	7	0	0	106	2584
	M00396	Lsm 2-8 complex	1	-2.61e-12	1	7	0	0	106	2584
	ko00591	Linoleic acid metabolism	1	-2.61e-12	1	7	0	0	106	2584
	dme00603	Glycosphingolipid biosynthesis - globo series	1	-2.61e-12	1	7	0	0	106	2584
	dme00591	Linoleic acid metabolism	1	-2.61e-12	1	7	0	0	106	2584
	dme_M00398	Sm core complex	1	-2.61e-12	1	7	0	0	106	2584
	dme_M00396	Lsm 2-8 complex	1	-2.61e-12	1	7	0	0	106	2584
	ko00430	Taurine and hypotaurine metabolism	1	-2.61e-12	1	7	0	0	106	2584
	ko00072	Synthesis and degradation of ketone bodies	1	-2.61e-12	1	7	0	0	106	2584
	dme_M00397	Lsm 1-7 complex	1	-2.61e-12	1	7	0	0	106	2584
	dme00750	Vitamin B6 metabolism	1	-2.1e-12	1	6	0	0	106	2584
	ko03450	Non-homologous end-joining	1	-2.1e-12	1	6	0	0	106	2584
	dme_M00285	MCM complex	1	-2.1e-12	1	6	0	0	106	2584
	M00383	ECV complex	1	-2.1e-12	1	6	0	0	106	2584
	dme_M00092	Phosphatidylethanolamine (PE) biosynthesis, ethanolamine => PE	1	-2.1e-12	1	6	0	0	106	2584
	M00284	Origin recognition complex	1	-2.1e-12	1	6	0	0	106	2584
	M00092	Phosphatidylethanolamine (PE) biosynthesis, ethanolamine => PE	1	-2.1e-12	1	6	0	0	106	2584
	M00052	Pyrimidine ribonucleotide biosynthesis, UMP => UDP/UTP,CDP/CTP	1	-2.1e-12	1	6	0	0	106	2584
	dme03450	Non-homologous end-joining	1	-2.1e-12	1	6	0	0	106	2584
	M00404	COPII complex	1	-2.1e-12	1	6	0	0	106	2584
	ko00061	Fatty acid biosynthesis	1	-2.1e-12	1	6	0	0	106	2584
	dme_M00284	Origin recognition complex	1	-2.1e-12	1	6	0	0	106	2584
	dme00061	Fatty acid biosynthesis	1	-2.1e-12	1	6	0	0	106	2584
	dme00604	Glycosphingolipid biosynthesis - ganglio series	1	-2.1e-12	1	6	0	0	106	2584
	dme_M00404	COPII complex	1	-2.1e-12	1	6	0	0	106	2584
	M00285	MCM complex	1	-2.1e-12	1	6	0	0	106	2584
	ko00750	Vitamin B6 metabolism	1	-2.1e-12	1	6	0	0	106	2584
	dme_M00052	Pyrimidine ribonucleotide biosynthesis, UMP => UDP/UTP,CDP/CTP	1	-2.1e-12	1	6	0	0	106	2584
	ko00604	Glycosphingolipid biosynthesis - ganglio series	1	-2.1e-12	1	6	0	0	106	2584
	dme_M00383	ECV complex	1	-2.1e-12	1	6	0	0	106	2584
	ko00514	Other types of O-glycan biosynthesis	1	-2.02e-12	1	12	0	0	106	2584
	dme_M00180	RNA polymerase II, eukaryotes	1	-2.02e-12	1	12	0	0	106	2584
	dme00670	One carbon pool by folate	1	-2.02e-12	1	12	0	0	106	2584
	M00180	RNA polymerase II, eukaryotes	1	-2.02e-12	1	12	0	0	106	2584
	dme00514	Other types of O-glycan biosynthesis	1	-2.02e-12	1	12	0	0	106	2584
	M00087	beta-Oxidation	1	-2.02e-12	1	12	0	0	106	2584
	M00010	Citrate cycle, first carbon oxidation, oxaloacetate => 2-oxoglutarate	1	-2.02e-12	1	12	0	0	106	2584
	dme_M00087	beta-Oxidation	1	-2.02e-12	1	12	0	0	106	2584
	dme00592	alpha-Linolenic acid metabolism	1	-2.02e-12	1	12	0	0	106	2584
	dme00534	Glycosaminoglycan biosynthesis - heparan sulfate / heparin	1	-2.02e-12	1	12	0	0	106	2584
	dme_M00182	RNA polymerase I, eukaryotes	1	-2.02e-12	1	12	0	0	106	2584
	ko00670	One carbon pool by folate	1	-2.02e-12	1	12	0	0	106	2584
	M00182	RNA polymerase I, eukaryotes	1	-2.02e-12	1	12	0	0	106	2584
	dme00062	Fatty acid elongation	1	-2.02e-12	1	12	0	0	106	2584
	ko00534	Glycosaminoglycan biosynthesis - heparan sulfate / heparin	1	-2.02e-12	1	12	0	0	106	2584
	ko00592	alpha-Linolenic acid metabolism	1	-2.02e-12	1	12	0	0	106	2584
	ko00062	Fatty acid elongation	1	-2.02e-12	1	12	0	0	106	2584
	dme_M00010	Citrate cycle, first carbon oxidation, oxaloacetate => 2-oxoglutarate	1	-2.02e-12	1	12	0	0	106	2584
	ko00472	D-Arginine and D-ornithine metabolism	1	-1.95e-12	1	1	0	0	106	2584
	ko00300	Lysine biosynthesis	1	-1.95e-12	1	1	0	0	106	2584
	dme00300	Lysine biosynthesis	1	-1.95e-12	1	1	0	0	106	2584
	M00005	PRPP biosynthesis, ribose 5P => PRPP	1	-1.95e-12	1	1	0	0	106	2584
	dme_M00005	PRPP biosynthesis, ribose 5P => PRPP	1	-1.95e-12	1	1	0	0	106	2584
	dme00472	D-Arginine and D-ornithine metabolism	1	-1.95e-12	1	1	0	0	106	2584
	dme_M00147	NADH dehydrogenase (ubiquinone) 1 beta subcomplex	1	-1.32e-12	1	13	0	0	106	2584
	M00147	NADH dehydrogenase (ubiquinone) 1 beta subcomplex	1	-1.32e-12	1	13	0	0	106	2584
	dme00760	Nicotinate and nicotinamide metabolism	1	-1.32e-12	1	13	0	0	106	2584
	ko00740	Riboflavin metabolism	1	-1.32e-12	1	13	0	0	106	2584
	ko00760	Nicotinate and nicotinamide metabolism	1	-1.32e-12	1	13	0	0	106	2584
	ko00590	Arachidonic acid metabolism	1	-1.32e-12	1	13	0	0	106	2584
	dme00740	Riboflavin metabolism	1	-1.32e-12	1	13	0	0	106	2584
	dme00590	Arachidonic acid metabolism	1	-1.32e-12	1	13	0	0	106	2584
	dme00360	Phenylalanine metabolism	1	-8.38e-13	1	10	0	0	106	2584
	ko00360	Phenylalanine metabolism	1	-8.38e-13	1	10	0	0	106	2584
	dme00770	Pantothenate and CoA biosynthesis	1	-8.38e-13	1	10	0	0	106	2584
	ko00920	Sulfur metabolism	1	-8.38e-13	1	10	0	0	106	2584
	M00290	Holo-TFIIH complex	1	-8.38e-13	1	10	0	0	106	2584
	dme_M00290	Holo-TFIIH complex	1	-8.38e-13	1	10	0	0	106	2584
	ko00770	Pantothenate and CoA biosynthesis	1	-8.38e-13	1	10	0	0	106	2584
	dme00920	Sulfur metabolism	1	-8.38e-13	1	10	0	0	106	2584
	dme_M00295	BRCA1-associated genome surveillance complex (BASC)	1	-3.82e-13	1	16	0	0	106	2584
	M00295	BRCA1-associated genome surveillance complex (BASC)	1	-3.82e-13	1	16	0	0	106	2584
	M00181	RNA polymerase III, eukaryotes	1	-3.82e-13	1	16	0	0	106	2584
	M00158	F-type ATPase, eukaryotes	1	-3.82e-13	1	16	0	0	106	2584
	dme_M00158	F-type ATPase, eukaryotes	1	-3.82e-13	1	16	0	0	106	2584
	dme_M00181	RNA polymerase III, eukaryotes	1	-3.82e-13	1	16	0	0	106	2584
	dme04512	ECM-receptor interaction	1	-3.32e-13	1	11	0	0	106	2584
	dme_M00380	SCF-BTRC complex	1	-3.32e-13	1	11	0	0	106	2584
	M00004	Pentose phosphate pathway (Pentose phosphate cycle)	1	-3.32e-13	1	11	0	0	106	2584
	M00387	SCF-FBW7 complex	1	-3.32e-13	1	11	0	0	106	2584
	dme00450	Selenocompound metabolism	1	-3.32e-13	1	11	0	0	106	2584
	M00380	SCF-BTRC complex	1	-3.32e-13	1	11	0	0	106	2584
	M00036	Leucine degradation, leucine => acetoacetate + acetyl-CoA	1	-3.32e-13	1	11	0	0	106	2584
	dme_M00381	SCF-SKP2 complex	1	-3.32e-13	1	11	0	0	106	2584
	M00381	SCF-SKP2 complex	1	-3.32e-13	1	11	0	0	106	2584
	dme_M00036	Leucine degradation, leucine => acetoacetate + acetyl-CoA	1	-3.32e-13	1	11	0	0	106	2584
	ko00450	Selenocompound metabolism	1	-3.32e-13	1	11	0	0	106	2584
	dme_M00387	SCF-FBW7 complex	1	-3.32e-13	1	11	0	0	106	2584
	dme_M00004	Pentose phosphate pathway (Pentose phosphate cycle)	1	-3.32e-13	1	11	0	0	106	2584
	ko04512	ECM-receptor interaction	1	-3.32e-13	1	11	0	0	106	2584
	ko00130	Ubiquinone and other terpenoid-quinone biosynthesis	1	-1.46e-13	1	9	0	0	106	2584
	dme_M00034	Methionine salvage pathway	1	-1.46e-13	1	9	0	0	106	2584
	dme00130	Ubiquinone and other terpenoid-quinone biosynthesis	1	-1.46e-13	1	9	0	0	106	2584
	M00351	Spliceosome, U1-snRNP	1	-1.46e-13	1	9	0	0	106	2584
	ko04122	Sulfur relay system	1	-1.46e-13	1	9	0	0	106	2584
	M00034	Methionine salvage pathway	1	-1.46e-13	1	9	0	0	106	2584
	M00391	Exosome, eukaryotes	1	-1.46e-13	1	9	0	0	106	2584
	dme02010	ABC transporters	1	-1.46e-13	1	9	0	0	106	2584
	dme_M00351	Spliceosome, U1-snRNP	1	-1.46e-13	1	9	0	0	106	2584
	ko02010	ABC transporters	1	-1.46e-13	1	9	0	0	106	2584
	dme_M00391	Exosome, eukaryotes	1	-1.46e-13	1	9	0	0	106	2584
	dme04122	Sulfur relay system	1	-1.46e-13	1	9	0	0	106	2584
	dme00400	Phenylalanine, tyrosine and tryptophan biosynthesis	1	-6.02e-14	1	4	0	0	106	2584
	M00083	Fatty acid biosynthesis, elongation	1	-6.02e-14	1	4	0	0	106	2584
	dme_M00263	DNA polymerase epsilon complex	1	-6.02e-14	1	4	0	0	106	2584
	M00426	Survival motor neuron (SMN) complex	1	-6.02e-14	1	4	0	0	106	2584
	dme_M00390	Exosome, archaea	1	-6.02e-14	1	4	0	0	106	2584
	M00263	DNA polymerase epsilon complex	1	-6.02e-14	1	4	0	0	106	2584
	M00027	GABA (gamma-Aminobutyrate) shunt	1	-6.02e-14	1	4	0	0	106	2584
	M00402	Translocon-associated protein (TRAP) complex	1	-6.02e-14	1	4	0	0	106	2584
	dme_M00286	GINS complex	1	-6.02e-14	1	4	0	0	106	2584
	dme_M00425	H/ACA ribonucleoprotein complex	1	-6.02e-14	1	4	0	0	106	2584
	dme_M00083	Fatty acid biosynthesis, elongation	1	-6.02e-14	1	4	0	0	106	2584
	M00401	Sec61 complex	1	-6.02e-14	1	4	0	0	106	2584
	dme_M00261	DNA polymerase alpha / primase complex	1	-6.02e-14	1	4	0	0	106	2584
	dme_M00057	Glycosaminoglycan biosynthesis, linkage tetrasaccharide	1	-6.02e-14	1	4	0	0	106	2584
	ko00400	Phenylalanine, tyrosine and tryptophan biosynthesis	1	-6.02e-14	1	4	0	0	106	2584
	M00057	Glycosaminoglycan biosynthesis, linkage tetrasaccharide	1	-6.02e-14	1	4	0	0	106	2584
	dme_M00401	Sec61 complex	1	-6.02e-14	1	4	0	0	106	2584
	dme_M00118	Glutathione biosynthesis, glutamate => glutathione	1	-6.02e-14	1	4	0	0	106	2584
	M00286	GINS complex	1	-6.02e-14	1	4	0	0	106	2584
	M00425	H/ACA ribonucleoprotein complex	1	-6.02e-14	1	4	0	0	106	2584
	M00118	Glutathione biosynthesis, glutamate => glutathione	1	-6.02e-14	1	4	0	0	106	2584
	M00261	DNA polymerase alpha / primase complex	1	-6.02e-14	1	4	0	0	106	2584
	dme_M00402	Translocon-associated protein (TRAP) complex	1	-6.02e-14	1	4	0	0	106	2584
	dme_M00426	Survival motor neuron (SMN) complex	1	-6.02e-14	1	4	0	0	106	2584
	dme_M00027	GABA (gamma-Aminobutyrate) shunt	1	-6.02e-14	1	4	0	0	106	2584
	M00390	Exosome, archaea	1	-6.02e-14	1	4	0	0	106	2584
	M00095	C5 isoprenoid biosynthesis, mevalonate pathway	1	8.63e-13	1	8	0	0	106	2584
	dme00340	Histidine metabolism	1	8.63e-13	1	8	0	0	106	2584
	M00632	Galactose degradation, Leloir pathway, galactose => alpha-D-glucose-1P	1	8.63e-13	1	8	0	0	106	2584
	M00549	Nucleotide sugar biosynthesis, glucose => UDP-glucose	1	8.63e-13	1	8	0	0	106	2584
	M00412	ESCRT-III complex	1	8.63e-13	1	8	0	0	106	2584
	dme_M00412	ESCRT-III complex	1	8.63e-13	1	8	0	0	106	2584
	dme_M00361	Nucleotide sugar biosynthesis, eukaryotes	1	8.63e-13	1	8	0	0	106	2584
	dme_M00632	Galactose degradation, Leloir pathway, galactose => alpha-D-glucose-1P	1	8.63e-13	1	8	0	0	106	2584
	M00361	Nucleotide sugar biosynthesis, eukaryotes	1	8.63e-13	1	8	0	0	106	2584
	dme_M00549	Nucleotide sugar biosynthesis, glucose => UDP-glucose	1	8.63e-13	1	8	0	0	106	2584
	ko00340	Histidine metabolism	1	8.63e-13	1	8	0	0	106	2584
	dme_M00095	C5 isoprenoid biosynthesis, mevalonate pathway	1	8.63e-13	1	8	0	0	106	2584
	dme_M00143	NADH dehydrogenase (ubiquinone) Fe-S protein/flavoprotein complex, mitochondria	1	1.06e-12	1	14	0	0	106	2584
	M00143	NADH dehydrogenase (ubiquinone) Fe-S protein/flavoprotein complex, mitochondria	1	1.06e-12	1	14	0	0	106	2584
	dme_M00146	NADH dehydrogenase (ubiquinone) 1 alpha subcomplex	1	1.06e-12	1	14	0	0	106	2584
	M00146	NADH dehydrogenase (ubiquinone) 1 alpha subcomplex	1	1.06e-12	1	14	0	0	106	2584
	dme_M00154	Cytochrome c oxidase	1	2.39e-12	1	19	0	0	106	2584
	M00352	Spliceosome, U2-snRNP	1	2.39e-12	1	19	0	0	106	2584
	M00154	Cytochrome c oxidase	1	2.39e-12	1	19	0	0	106	2584
	ko00380	Tryptophan metabolism	1	2.39e-12	1	19	0	0	106	2584
	dme_M00352	Spliceosome, U2-snRNP	1	2.39e-12	1	19	0	0	106	2584
	dme00380	Tryptophan metabolism	1	2.39e-12	1	19	0	0	106	2584
	M00353	Spliceosome, Prp19/CDC5L complex	1	2.53e-12	1	17	0	0	106	2584
	dme_M00353	Spliceosome, Prp19/CDC5L complex	1	2.53e-12	1	17	0	0	106	2584
	dme00910	Nitrogen metabolism	1	2.53e-12	1	17	0	0	106	2584
	dme_M00430	Exon junction complex (EJC)	1	2.53e-12	1	17	0	0	106	2584
	dme01040	Biosynthesis of unsaturated fatty acids	1	2.53e-12	1	17	0	0	106	2584
	M00430	Exon junction complex (EJC)	1	2.53e-12	1	17	0	0	106	2584
	ko01040	Biosynthesis of unsaturated fatty acids	1	2.53e-12	1	17	0	0	106	2584
	ko00910	Nitrogen metabolism	1	2.53e-12	1	17	0	0	106	2584
	ko00650	Butanoate metabolism	1	2.53e-12	1	17	0	0	106	2584
	dme00650	Butanoate metabolism	1	2.53e-12	1	17	0	0	106	2584
	M00011	Citrate cycle, second carbon oxidation, 2-oxoglutarate => oxaloacetate	1	3.02e-12	1	23	0	0	106	2584
	dme_M00011	Citrate cycle, second carbon oxidation, 2-oxoglutarate => oxaloacetate	1	3.02e-12	1	23	0	0	106	2584
	dme03440	Homologous recombination	1	4.17e-12	1	20	0	0	106	2584
	dme03410	Base excision repair	1	4.17e-12	1	20	0	0	106	2584
	ko03430	Mismatch repair	1	4.17e-12	1	20	0	0	106	2584
	ko04130	SNARE interactions in vesicular transport	1	4.17e-12	1	20	0	0	106	2584
	ko03410	Base excision repair	1	4.17e-12	1	20	0	0	106	2584
	dme03430	Mismatch repair	1	4.17e-12	1	20	0	0	106	2584
	dme00640	Propanoate metabolism	1	4.17e-12	1	20	0	0	106	2584
	ko03440	Homologous recombination	1	4.17e-12	1	20	0	0	106	2584
	ko00640	Propanoate metabolism	1	4.17e-12	1	20	0	0	106	2584
	dme04130	SNARE interactions in vesicular transport	1	4.17e-12	1	20	0	0	106	2584
	ko00790	Folate biosynthesis	1	4.64e-12	1	24	0	0	106	2584
	dme00790	Folate biosynthesis	1	4.64e-12	1	24	0	0	106	2584
	dme00630	Glyoxylate and dicarboxylate metabolism	1	4.64e-12	1	24	0	0	106	2584
	ko00630	Glyoxylate and dicarboxylate metabolism	1	4.64e-12	1	24	0	0	106	2584
	dme01210	2-Oxocarboxylic acid metabolism	1	5e-12	1	18	0	0	106	2584
	dme00410	beta-Alanine metabolism	1	5e-12	1	18	0	0	106	2584
	ko00410	beta-Alanine metabolism	1	5e-12	1	18	0	0	106	2584
	ko01210	2-Oxocarboxylic acid metabolism	1	5e-12	1	18	0	0	106	2584
	dme00270	Cysteine and methionine metabolism	1	5.74e-12	1	26	0	0	106	2584
	ko00270	Cysteine and methionine metabolism	1	5.74e-12	1	26	0	0	106	2584
	dme00250	Alanine, aspartate and glutamate metabolism	1	6.32e-12	1	29	0	0	106	2584
	ko00250	Alanine, aspartate and glutamate metabolism	1	6.32e-12	1	29	0	0	106	2584
	dme_M00340	Proteasome, 20S core particle	1	6.35e-12	1	25	0	0	106	2584
	M00340	Proteasome, 20S core particle	1	6.35e-12	1	25	0	0	106	2584
	dme03020	RNA polymerase	1	6.6e-12	1	28	0	0	106	2584
	ko03020	RNA polymerase	1	6.6e-12	1	28	0	0	106	2584
	dme00051	Fructose and mannose metabolism	1	6.6e-12	1	28	0	0	106	2584
	ko00051	Fructose and mannose metabolism	1	6.6e-12	1	28	0	0	106	2584
	dme00280	Valine, leucine and isoleucine degradation	1	6.65e-12	1	31	0	0	106	2584
	dme00310	Lysine degradation	1	6.65e-12	1	31	0	0	106	2584
	ko00280	Valine, leucine and isoleucine degradation	1	6.65e-12	1	31	0	0	106	2584
	ko00310	Lysine degradation	1	6.65e-12	1	31	0	0	106	2584
	ko00830	Retinol metabolism	1	6.65e-12	1	31	0	0	106	2584
	dme00830	Retinol metabolism	1	6.65e-12	1	31	0	0	106	2584
	dme_M00427	Nuclear pore complex	1	7.17e-12	1	33	0	0	106	2584
	M00427	Nuclear pore complex	1	7.17e-12	1	33	0	0	106	2584
	dme00053	Ascorbate and aldarate metabolism	1	7.42e-12	1	30	0	0	106	2584
	ko00053	Ascorbate and aldarate metabolism	1	7.42e-12	1	30	0	0	106	2584
	M00354	Spliceosome, U4/U6.U5 tri-snRNP	1	7.42e-12	1	30	0	0	106	2584
	dme_M00354	Spliceosome, U4/U6.U5 tri-snRNP	1	7.42e-12	1	30	0	0	106	2584
	dme03060	Protein export	1	8.4e-12	1	22	0	0	106	2584
	ko03060	Protein export	1	8.4e-12	1	22	0	0	106	2584
	M00355	Spliceosome, 35S U5-snRNP	1	1.13e-11	1	40	0	0	106	2584
	dme_M00355	Spliceosome, 35S U5-snRNP	1	1.13e-11	1	40	0	0	106	2584
	ko03420	Nucleotide excision repair	1	1.19e-11	1	39	0	0	106	2584
	dme03420	Nucleotide excision repair	1	1.19e-11	1	39	0	0	106	2584
	ko00520	Amino sugar and nucleotide sugar metabolism	1	1.21e-11	1	45	0	0	106	2584
	dme00520	Amino sugar and nucleotide sugar metabolism	1	1.21e-11	1	45	0	0	106	2584
	M00009	Citrate cycle (TCA cycle, Krebs cycle)	1	1.3e-11	1	35	0	0	106	2584
	dme_M00009	Citrate cycle (TCA cycle, Krebs cycle)	1	1.3e-11	1	35	0	0	106	2584
	ko03030	DNA replication	1	1.3e-11	1	35	0	0	106	2584
	dme03030	DNA replication	1	1.3e-11	1	35	0	0	106	2584
	ko03018	RNA degradation	1	1.67e-11	1	53	0	0	106	2584
	dme03018	RNA degradation	1	1.67e-11	1	53	0	0	106	2584
	ko00982	Drug metabolism - cytochrome P450	1	1.69e-11	1	62	0	0	106	2584
	dme00980	Metabolism of xenobiotics by cytochrome P450	1	1.69e-11	1	62	0	0	106	2584
	ko00980	Metabolism of xenobiotics by cytochrome P450	1	1.69e-11	1	62	0	0	106	2584
	dme00982	Drug metabolism - cytochrome P450	1	1.69e-11	1	62	0	0	106	2584
	dme03008	Ribosome biogenesis in eukaryotes	1	2.62e-11	1	86	0	0	106	2584
	ko03008	Ribosome biogenesis in eukaryotes	1	2.62e-11	1	86	0	0	106	2584

## Sheet: Cl3
Significant Kegg terms	TermID	Term	Enrichment	logP	FDR_BH	Genes in Term	Target Genes in Term	Fraction of Targets in Term	Total Target Genes	Total Genes	Entrez Gene IDs	Gene Symbols
FDR_BH p<0.01	dme03060	Protein export	2.56047e-13	-28.9934	6.2476e-11	22	15	0.0837989	179	2584	3.20953e+74	Spase25,Trp1,CG9240,Gtp-bp,twr,SrpRbeta,Sec61alpha,Srp72,Spase12,Srp54k,Sec61gamma,Srp14,Sec61beta,Hsc70-3,Spase22-23
	ko03060	Protein export	2.56047e-13	-28.9934	6.2476e-11	22	15	0.0837989	179	2584	3.20953e+74	Spase25,Trp1,CG9240,Gtp-bp,twr,SrpRbeta,Sec61alpha,Srp72,Spase12,Srp54k,Sec61gamma,Srp14,Sec61beta,Hsc70-3,Spase22-23
	ko04141	Protein processing in endoplasmic reticulum	3.09097e-12	-26.5025	3.771e-10	126	33	0.184358	179	2584	3.47143e+167	Edem2,Trp1,Ero1L,Sec61alpha,Cnx99A,CaBP1,Gint3,Sec61gamma,SsRbeta,Gp93,CG2918,ergic53,Tapdelta,Ugt,ERp60,Hrd3,OstStt3,TRAM,Pdi,CG5885,Hsc70-3,Xbp1,Der-1,l(1)G0320,CG4164,CG5510,Crc,CG33303,CG6766,CG6453,Ost48,wbl,Sec61beta
	dme04141	Protein processing in endoplasmic reticulum	3.09097e-12	-26.5025	3.771e-10	126	33	0.184358	179	2584	3.47143e+167	Edem2,Trp1,Ero1L,Sec61alpha,Cnx99A,CaBP1,Gint3,Sec61gamma,SsRbeta,Gp93,CG2918,ergic53,Tapdelta,Ugt,ERp60,Hrd3,OstStt3,TRAM,Pdi,CG5885,Hsc70-3,Xbp1,Der-1,l(1)G0320,CG4164,CG5510,Crc,CG33303,CG6766,CG6453,Ost48,wbl,Sec61beta
	dme00512	Mucin type O-Glycan biosynthesis	1.924e-06	-13.1611	0.00015649	15	8	0.0446927	179	2584	3.67174e+42	GalNAc-T1,pgant3,pgant6,GalNAc-T2,pgant4,CG30463,pgant5,C1GalTA
	ko00512	Mucin type O-Glycan biosynthesis	1.924e-06	-13.1611	0.00015649	15	8	0.0446927	179	2584	3.67174e+42	GalNAc-T1,pgant3,pgant6,GalNAc-T2,pgant4,CG30463,pgant5,C1GalTA
	M00402	Translocon-associated protein (TRAP) complex	2.2315e-05	-10.7102	0.0013612	4	4	0.0223464	179	2584	4.56803e+20	Tapdelta,CG5885,SsRbeta,l(1)G0320
	dme_M00402	Translocon-associated protein (TRAP) complex	2.2315e-05	-10.7102	0.0013612	4	4	0.0223464	179	2584	4.56803e+20	Tapdelta,CG5885,SsRbeta,l(1)G0320
	ko00520	Amino sugar and nucleotide sugar metabolism	0.000164668	-8.71158	0.0080358	45	11	0.0614525	179	2584	4.33733e+56	Gfat2,Cht11,sgl,CG1129,CG1969,Cht5,CG10688,Hexo1,CG8207,Oscillin,Cht3
FDR_BH p<0.01	dme00520	Amino sugar and nucleotide sugar metabolism	0.000164668	-8.71158	0.0080358	45	11	0.0614525	179	2584	4.33733e+56	Gfat2,Cht11,sgl,CG1129,CG1969,Cht5,CG10688,Hexo1,CG8207,Oscillin,Cht3
FDR_BH p<0.05	ko00600	Sphingolipid metabolism	0.000423721	-7.76644	0.017231	28	8	0.0446927	179	2584	4.36184e+40	CDase,CG10425,Sply,wun2,CG3376,Gal,bwa,CG11438
	dme00600	Sphingolipid metabolism	0.000423721	-7.76644	0.017231	28	8	0.0446927	179	2584	4.36184e+40	CDase,CG10425,Sply,wun2,CG3376,Gal,bwa,CG11438
	ko00510	N-Glycan biosynthesis	0.000685401	-7.28551	0.023891	37	9	0.0502793	179	2584	4.04024e+49	CG11306,CG33977,CG33303,CG31849,OstStt3,Ost48,CG8311,CG6308,CG10166
	dme00510	N-Glycan biosynthesis	0.000685401	-7.28551	0.023891	37	9	0.0502793	179	2584	4.04024e+49	CG11306,CG33977,CG33303,CG31849,OstStt3,Ost48,CG8311,CG6308,CG10166
	M00401	Sec61 complex	0.00124204	-6.691	0.037882	4	3	0.0167598	179	2584	339053296846080	Sec61alpha,Sec61gamma,Sec61beta
FDR_BH p<0.05	dme_M00401	Sec61 complex	0.00124204	-6.691	0.037882	4	3	0.0167598	179	2584	339053296846080	Sec61alpha,Sec61gamma,Sec61beta
Significant Kegg terms	dme00604	Glycosphingolipid biosynthesis - ganglio series	0.00559419	-5.18603	0.15166	6	3	0.0167598	179	2584	385283383939876	Hexo1,Gal,CG9706
Enrichment p<0.01	ko00604	Glycosphingolipid biosynthesis - ganglio series	0.00559419	-5.18603	0.15166	6	3	0.0167598	179	2584	385283383939876	Hexo1,Gal,CG9706
	ko00514	Other types of O-glycan biosynthesis	0.00709341	-4.94859	0.15734	12	4	0.0223464	179	2584	3.10243e+20	tw,rumi,CG9996,rt
	dme00514	Other types of O-glycan biosynthesis	0.00709341	-4.94859	0.15734	12	4	0.0223464	179	2584	3.10243e+20	tw,rumi,CG9996,rt
	M00087	beta-Oxidation	0.00709341	-4.94859	0.15734	12	4	0.0223464	179	2584	3.43134e+19	yip2,CG12262,CG4586,CG9527
	dme_M00087	beta-Oxidation	0.00709341	-4.94859	0.15734	12	4	0.0223464	179	2584	3.43134e+19	yip2,CG12262,CG4586,CG9527
	dme_M00072	N-glycosylation by oligosaccharyltransferase	0.00929417	-4.67837	0.17329	7	3	0.0167598	179	2584	3.18494e+16	Ost48,OstStt3,CG33303
	M00099	Sphingosine biosynthesis	0.00929417	-4.67837	0.17329	7	3	0.0167598	179	2584	4361843043250730	CDase,CG10425,bwa
	M00072	N-glycosylation by oligosaccharyltransferase	0.00929417	-4.67837	0.17329	7	3	0.0167598	179	2584	3.18494e+16	Ost48,OstStt3,CG33303
	dme_M00099	Sphingosine biosynthesis	0.00929417	-4.67837	0.17329	7	3	0.0167598	179	2584	4361843043250730	CDase,CG10425,bwa
	ko04130	SNARE interactions in vesicular transport	0.00994272	-4.61091	0.17329	20	5	0.027933	179	2584	3.85414e+25	Syx17,CG2023,Sec22,Syx6,Gos28
Enrichment p<0.01	dme04130	SNARE interactions in vesicular transport	0.00994272	-4.61091	0.17329	20	5	0.027933	179	2584	3.85414e+25	Syx17,CG2023,Sec22,Syx6,Gos28
	dme_M00020	Serine biosynthesis, glycerate-3P => serine	0.0136666	-4.2928	0.21534	3	2	0.0111732	179	2584	4639134554	CG11899,CG6287
	M00020	Serine biosynthesis, glycerate-3P => serine	0.0136666	-4.2928	0.21534	3	2	0.0111732	179	2584	4639134554	CG11899,CG6287
	dme_M00361	Nucleotide sugar biosynthesis, eukaryotes	0.0141204	-4.26014	0.21534	8	3	0.0167598	179	2584	387604059936730	sgl,CG1129,CG8207
	M00361	Nucleotide sugar biosynthesis, eukaryotes	0.0141204	-4.26014	0.21534	8	3	0.0167598	179	2584	387604059936730	sgl,CG1129,CG8207
	dme04142	Lysosome	0.0194539	-3.93971	0.27922	90	12	0.0670391	179	2584	3.64874e+59	CG18278,CG3376,cathD,Ppt2,Sap-r,Mvl,Lamp1,CG14767,Hexo1,Gal,CG12163,CG14291
	ko04142	Lysosome	0.0194539	-3.93971	0.27922	90	12	0.0670391	179	2584	3.64874e+59	CG18278,CG3376,cathD,Ppt2,Sap-r,Mvl,Lamp1,CG14767,Hexo1,Gal,CG12163,CG14291
	dme00531	Glycosaminoglycan degradation	0.0209652	-3.86489	0.28419	16	4	0.0223464	179	2584	3.64874e+19	CG18278,Hexo1,Gal,CG14291
	ko00531	Glycosaminoglycan degradation	0.0209652	-3.86489	0.28419	16	4	0.0223464	179	2584	3.64874e+19	CG18278,Hexo1,Gal,CG14291
	ko00920	Sulfur metabolism	0.027297	-3.60098	0.35055	10	3	0.0167598	179	2584	3227940167246390	CG15743,Papss,sprt
	dme00920	Sulfur metabolism	0.027297	-3.60098	0.35055	10	3	0.0167598	179	2584	3227940167246390	CG15743,Papss,sprt
	dme00561	Glycerolipid metabolism	0.0292861	-3.53064	0.35507	44	7	0.0391061	179	2584	4.32443e+34	CG31075,CG6847,wun2,CG2767,CG5966,CG11438,CG4729
	ko00561	Glycerolipid metabolism	0.0292861	-3.53064	0.35507	44	7	0.0391061	179	2584	4.32443e+34	CG31075,CG6847,wun2,CG2767,CG5966,CG11438,CG4729
	dme_M00014	Glucuronate pathway (uronate pathway)	0.030559	-3.4881	0.35507	35	6	0.0335196	179	2584	5.35024e+29	Ugt86Di,CG17323,sgl,CG3534,Ugt58Fa,CG2767
	M00014	Glucuronate pathway (uronate pathway)	0.030559	-3.4881	0.35507	35	6	0.0335196	179	2584	5.35024e+29	Ugt86Di,CG17323,sgl,CG3534,Ugt58Fa,CG2767
	ko00040	Pentose and glucuronate interconversions	0.0327224	-3.4197	0.36292	45	7	0.0391061	179	2584	5.35024e+34	Ugt86Di,CG31075,CG17323,Ugt58Fa,sgl,CG3534,CG2767
	dme00040	Pentose and glucuronate interconversions	0.0327224	-3.4197	0.36292	45	7	0.0391061	179	2584	5.35024e+34	Ugt86Di,CG31075,CG17323,sgl,CG3534,Ugt58Fa,CG2767
	dme00534	Glycosaminoglycan biosynthesis - heparan sulfate / heparin	0.045182	-3.09706	0.47932	12	3	0.0167598	179	2584	2.519e+17	GlcAT-I,Hs2st,Ext2
	ko00534	Glycosaminoglycan biosynthesis - heparan sulfate / heparin	0.045182	-3.09706	0.47932	12	3	0.0167598	179	2584	2.519e+17	GlcAT-I,Hs2st,Ext2
	dme00053	Ascorbate and aldarate metabolism	0.0521998	-2.95268	0.50947	30	5	0.027933	179	2584	5.35024e+24	Ugt86Di,CG31075,CG17323,sgl,Ugt58Fa
	dme00071	Fatty acid degradation	0.0521998	-2.95268	0.50947	30	5	0.027933	179	2584	4.32443e+24	CG31075,yip2,CG12262,CG4586,CG9527
	ko00053	Ascorbate and aldarate metabolism	0.0521998	-2.95268	0.50947	30	5	0.027933	179	2584	5.35024e+24	Ugt86Di,CG31075,CG17323,Ugt58Fa,sgl
	ko00071	Fatty acid degradation	0.0521998	-2.95268	0.50947	30	5	0.027933	179	2584	4.32444e+24	CG31075,CG12262,yip2,CG9527,CG4586
	M00089	Triacylglycerol biosynthesis	0.0675456	-2.69495	0.63389	14	3	0.0167598	179	2584	535584046939820	wun2,CG11438,CG4729
	dme_M00089	Triacylglycerol biosynthesis	0.0675456	-2.69495	0.63389	14	3	0.0167598	179	2584	535584046939820	wun2,CG11438,CG4729
	dme00410	beta-Alanine metabolism	0.123924	-2.08809	1	18	3	0.0167598	179	2584	432443886434791	CG31075,CG12262,b
	ko00410	beta-Alanine metabolism	0.123924	-2.08809	1	18	3	0.0167598	179	2584	432443886434791	CG31075,CG12262,b
	dme00051	Fructose and mannose metabolism	0.124236	-2.08557	1	28	4	0.0223464	179	2584	4.05994e+19	CG1129,fbp,CG8207,CG10688
	ko00051	Fructose and mannose metabolism	0.124236	-2.08557	1	28	4	0.0223464	179	2584	4.05994e+19	CG1129,fbp,CG8207,CG10688
	M00100	Sphingosine degradation	0.133771	-2.01162	1	2	1	0.00558659	179	2584	46059	Sply
	dme_M00100	Sphingosine degradation	0.133771	-2.01162	1	2	1	0.00558659	179	2584	46059	Sply
	ko04145	Phagosome	0.136286	-1.993	1	74	8	0.0446927	179	2584	3.39054e+39	Sec61alpha,Lamp1,Cnx99A,Sec22,Sec61gamma,Crc,Sec61beta,betaTub56D
	dme04145	Phagosome	0.136286	-1.993	1	74	8	0.0446927	179	2584	3.39054e+39	Sec61alpha,Lamp1,Cnx99A,Sec22,Sec61gamma,Crc,Sec61beta,betaTub56D
	ko01212	Fatty acid metabolism	0.150298	-1.89513	1	41	5	0.027933	179	2584	3.43134e+24	yip2,CG12262,CG4586,CG9527,Ppt2
	dme01212	Fatty acid metabolism	0.150298	-1.89513	1	41	5	0.027933	179	2584	3.43134e+24	yip2,CG12262,CG4586,CG9527,Ppt2
	dme00860	Porphyrin and chlorophyll metabolism	0.173327	-1.75258	1	43	5	0.027933	179	2584	5.35024e+24	Ugt86Di,CG17323,Ho,Ugt58Fa,Fer1HCH
	ko00860	Porphyrin and chlorophyll metabolism	0.173327	-1.75258	1	43	5	0.027933	179	2584	5.35024e+24	Ugt86Di,CG17323,Ho,Ugt58Fa,Fer1HCH
	dme04146	Peroxisome	0.187827	-1.67224	1	68	7	0.0391061	179	2584	4.07874e+34	CG1041,Cat,CG5065,CG7970,CG4586,CG9527,Sod
	ko04146	Peroxisome	0.187827	-1.67224	1	68	7	0.0391061	179	2584	4.07874e+34	CG1041,Cat,CG5065,CG7970,CG4586,CG9527,Sod
	ko00511	Other glycan degradation	0.192056	-1.64997	1	22	3	0.0167598	179	2584	327263852833839	CG5613,Hexo1,Gal
	dme00511	Other glycan degradation	0.192056	-1.64997	1	22	3	0.0167598	179	2584	327263852833839	CG5613,Hexo1,Gal
	ko01220	Degradation of aromatic compounds	0.193823	-1.64081	1	3	1	0.00558659	179	2584	40946	CG2767
	dme01220	Degradation of aromatic compounds	0.193823	-1.64081	1	3	1	0.00558659	179	2584	40946	CG2767
	dme00592	alpha-Linolenic acid metabolism	0.199861	-1.61014	1	12	2	0.0111732	179	2584	3164133898	CG4586,CG9527
	dme00062	Fatty acid elongation	0.199861	-1.61014	1	12	2	0.0111732	179	2584	3431334564	yip2,Ppt2
	ko00592	alpha-Linolenic acid metabolism	0.199861	-1.61014	1	12	2	0.0111732	179	2584	3164133898	CG4586,CG9527
	ko00062	Fatty acid elongation	0.199861	-1.61014	1	12	2	0.0111732	179	2584	3431334564	yip2,Ppt2
	dme_M00055	N-glycan precursor biosynthesis	0.226049	-1.48701	1	13	2	0.0111732	179	2584	4040232479	CG11306,CG6308
	M00055	N-glycan precursor biosynthesis	0.226049	-1.48701	1	13	2	0.0111732	179	2584	4040232479	CG11306,CG6308
	M00027	GABA (gamma-Aminobutyrate) shunt	0.249734	-1.38736	1	4	1	0.00558659	179	2584	34791	b
	dme_M00057	Glycosaminoglycan biosynthesis, linkage tetrasaccharide	0.249734	-1.38736	1	4	1	0.00558659	179	2584	251900	GlcAT-I
	M00057	Glycosaminoglycan biosynthesis, linkage tetrasaccharide	0.249734	-1.38736	1	4	1	0.00558659	179	2584	251900	GlcAT-I
	dme_M00027	GABA (gamma-Aminobutyrate) shunt	0.249734	-1.38736	1	4	1	0.00558659	179	2584	34791	b
	dme04068	FoxO signaling pathway	0.276396	-1.28592	1	51	5	0.027933	179	2584	4.02783e+24	CG5059,Pi3K21B,Pdk1,nmo,Cat
	dme_M00059	Glycosaminoglycan biosynthesis, heparan sulfate backbone	0.301788	-1.19803	1	5	1	0.00558659	179	2584	3772101	Ext2
	M00094	Ceramide biosynthesis	0.301788	-1.19803	1	5	1	0.00558659	179	2584	43043	CG10425
	M00059	Glycosaminoglycan biosynthesis, heparan sulfate backbone	0.301788	-1.19803	1	5	1	0.00558659	179	2584	3772101	Ext2
	M00085	Fatty acid biosynthesis, elongation, mitochondria	0.301788	-1.19803	1	5	1	0.00558659	179	2584	34313	yip2
	M00013	Malonate semialdehyde pathway, propanoyl-CoA => Acetyl-CoA	0.301788	-1.19803	1	5	1	0.00558659	179	2584	38864	CG12262
	dme_M00013	Malonate semialdehyde pathway, propanoyl-CoA => Acetyl-CoA	0.301788	-1.19803	1	5	1	0.00558659	179	2584	38864	CG12262
	dme_M00094	Ceramide biosynthesis	0.301788	-1.19803	1	5	1	0.00558659	179	2584	43043	CG10425
	dme_M00085	Fatty acid biosynthesis, elongation, mitochondria	0.301788	-1.19803	1	5	1	0.00558659	179	2584	34313	yip2
	dme01040	Biosynthesis of unsaturated fatty acids	0.331628	-1.10374	1	17	2	0.0111732	179	2584	3164133898	CG4586,CG9527
	ko01040	Biosynthesis of unsaturated fatty acids	0.331628	-1.10374	1	17	2	0.0111732	179	2584	3164133898	CG4586,CG9527
	ko00650	Butanoate metabolism	0.331628	-1.10374	1	17	2	0.0111732	179	2584	3097234791	CG13377,b
	dme00650	Butanoate metabolism	0.331628	-1.10374	1	17	2	0.0111732	179	2584	3097234791	CG13377,b
	dme00750	Vitamin B6 metabolism	0.350248	-1.04911	1	6	1	0.00558659	179	2584	46391	CG11899
	dme_M00092	Phosphatidylethanolamine (PE) biosynthesis, ethanolamine => PE	0.350248	-1.04911	1	6	1	0.00558659	179	2584	35417	CG2201
	M00092	Phosphatidylethanolamine (PE) biosynthesis, ethanolamine => PE	0.350248	-1.04911	1	6	1	0.00558659	179	2584	35417	CG2201
	M00052	Pyrimidine ribonucleotide biosynthesis, UMP => UDP/UTP,CDP/CTP	0.350248	-1.04911	1	6	1	0.00558659	179	2584	43661	CG15547
	ko00750	Vitamin B6 metabolism	0.350248	-1.04911	1	6	1	0.00558659	179	2584	46391	CG11899
	dme_M00052	Pyrimidine ribonucleotide biosynthesis, UMP => UDP/UTP,CDP/CTP	0.350248	-1.04911	1	6	1	0.00558659	179	2584	43661	CG15547
	dme00280	Valine, leucine and isoleucine degradation	0.364635	-1.00886	1	31	3	0.0167598	179	2584	432443431338864	CG31075,yip2,CG12262
	ko00280	Valine, leucine and isoleucine degradation	0.364635	-1.00886	1	31	3	0.0167598	179	2584	432443431338864	CG31075,yip2,CG12262
	ko00830	Retinol metabolism	0.364635	-1.00886	1	31	3	0.0167598	179	2584	535023513837590	Ugt86Di,CG17323,Ugt58Fa
	dme00830	Retinol metabolism	0.364635	-1.00886	1	31	3	0.0167598	179	2584	535023513837590	Ugt86Di,CG17323,Ugt58Fa
	ko00380	Tryptophan metabolism	0.383185	-0.959239	1	19	2	0.0111732	179	2584	4324440048	CG31075,Cat
	dme00380	Tryptophan metabolism	0.383185	-0.959239	1	19	2	0.0111732	179	2584	4324440048	CG31075,Cat
	dme00430	Taurine and hypotaurine metabolism	0.395363	-0.927951	1	7	1	0.00558659	179	2584	34791	b
	ko00532	Glycosaminoglycan biosynthesis - chondroitin sulfate / dermatan sulfate	0.395363	-0.927951	1	7	1	0.00558659	179	2584	251900	GlcAT-I
	ko00603	Glycosphingolipid biosynthesis - globo series	0.395363	-0.927951	1	7	1	0.00558659	179	2584	38528	Hexo1
	dme00072	Synthesis and degradation of ketone bodies	0.395363	-0.927951	1	7	1	0.00558659	179	2584	30972	CG13377
	dme00603	Glycosphingolipid biosynthesis - globo series	0.395363	-0.927951	1	7	1	0.00558659	179	2584	38528	Hexo1
	dme00532	Glycosaminoglycan biosynthesis - chondroitin sulfate / dermatan sulfate	0.395363	-0.927951	1	7	1	0.00558659	179	2584	251900	GlcAT-I
	ko00430	Taurine and hypotaurine metabolism	0.395363	-0.927951	1	7	1	0.00558659	179	2584	34791	b
	ko00072	Synthesis and degradation of ketone bodies	0.395363	-0.927951	1	7	1	0.00558659	179	2584	30972	CG13377
	ko00500	Starch and sucrose metabolism	0.40291	-0.909042	1	60	5	0.027933	179	2584	5.35023e+24	Ugt86Di,CG5171,CG17323,sgl,Ugt58Fa
	dme00500	Starch and sucrose metabolism	0.40291	-0.909042	1	60	5	0.027933	179	2584	5.35023e+24	Ugt86Di,CG5171,CG17323,sgl,Ugt58Fa
	dme00640	Propanoate metabolism	0.408336	-0.895664	1	20	2	0.0111732	179	2584	4324438864	CG31075,CG12262
	ko00640	Propanoate metabolism	0.408336	-0.895664	1	20	2	0.0111732	179	2584	4324438864	CG31075,CG12262
	ko00983	Drug metabolism - other enzymes	0.412254	-0.886114	1	47	4	0.0223464	179	2584	5.35024e+19	Ugt86Di,CG17323,Ugt58Fa,CG17224
	dme00983	Drug metabolism - other enzymes	0.412254	-0.886114	1	47	4	0.0223464	179	2584	5.35024e+19	Ugt86Di,CG17323,Ugt58Fa,CG17224
	dme00340	Histidine metabolism	0.437361	-0.826996	1	8	1	0.00558659	179	2584	43244	CG31075
	ko00340	Histidine metabolism	0.437361	-0.826996	1	8	1	0.00558659	179	2584	43244	CG31075
	ko04150	mTOR signaling pathway	0.459926	-0.77669	1	36	3	0.0167598	179	2584	332033801739454	Pi3K21B,Pdk1,Atg1
	dme04150	mTOR signaling pathway	0.459926	-0.77669	1	36	3	0.0167598	179	2584	332033801739454	Pi3K21B,Pdk1,Atg1
	dme_M00034	Methionine salvage pathway	0.476458	-0.741376	1	9	1	0.00558659	179	2584	34396	SamDC
	M00034	Methionine salvage pathway	0.476458	-0.741376	1	9	1	0.00558659	179	2584	34396	SamDC
	ko00565	Ether lipid metabolism	0.480573	-0.732776	1	23	2	0.0111732	179	2584	5355840469	wun2,CG11438
	ko00030	Pentose phosphate pathway	0.480573	-0.732776	1	23	2	0.0111732	179	2584	3241235265	CG12539,fbp
	dme00565	Ether lipid metabolism	0.480573	-0.732776	1	23	2	0.0111732	179	2584	5355840469	wun2,CG11438
	dme00030	Pentose phosphate pathway	0.480573	-0.732776	1	23	2	0.0111732	179	2584	3241235265	CG12539,fbp
	dme00630	Glyoxylate and dicarboxylate metabolism	0.50344	-0.686291	1	24	2	0.0111732	179	2584	4004841269	Cat,Irp-1B
	ko00630	Glyoxylate and dicarboxylate metabolism	0.50344	-0.686291	1	24	2	0.0111732	179	2584	4004841269	Cat,Irp-1B
	M00131	Inositol phosphate metabolism, Ins(1,3,4,5)P4 => Ins(1,3,4)P3 => myo-inositol	0.512852	-0.667769	1	10	1	0.00558659	179	2584	32279	CG15743
	dme_M00131	Inositol phosphate metabolism, Ins(1,3,4,5)P4 => Ins(1,3,4)P3 => myo-inositol	0.512852	-0.667769	1	10	1	0.00558659	179	2584	32279	CG15743
	dme04512	ECM-receptor interaction	0.546729	-0.603803	1	11	1	0.00558659	179	2584	36773	Dg
	dme00450	Selenocompound metabolism	0.546729	-0.603803	1	11	1	0.00558659	179	2584	40167	Papss
	M00036	Leucine degradation, leucine => acetoacetate + acetyl-CoA	0.546729	-0.603803	1	11	1	0.00558659	179	2584	38864	CG12262
	dme_M00036	Leucine degradation, leucine => acetoacetate + acetyl-CoA	0.546729	-0.603803	1	11	1	0.00558659	179	2584	38864	CG12262
	ko00450	Selenocompound metabolism	0.546729	-0.603803	1	11	1	0.00558659	179	2584	40167	Papss
	ko04512	ECM-receptor interaction	0.546729	-0.603803	1	11	1	0.00558659	179	2584	36773	Dg
	dme00270	Cysteine and methionine metabolism	0.547187	-0.602965	1	26	2	0.0111732	179	2584	4204334396	Ahcy89E,SamDC
	ko00270	Cysteine and methionine metabolism	0.547187	-0.602965	1	26	2	0.0111732	179	2584	4204334396	Ahcy89E,SamDC
	ko04144	Endocytosis	0.567241	-0.566971	1	87	6	0.0335196	179	2584	4.42634e+29	Sara,Rab11,Vps45,CG7967,Ret,lqf
	dme04144	Endocytosis	0.567241	-0.566971	1	87	6	0.0335196	179	2584	4.42634e+29	Sara,Rab11,Vps45,CG7967,Ret,lqf
	M00010	Citrate cycle, first carbon oxidation, oxaloacetate => 2-oxoglutarate	0.578262	-0.547728	1	12	1	0.00558659	179	2584	41269	Irp-1B
	dme_M00010	Citrate cycle, first carbon oxidation, oxaloacetate => 2-oxoglutarate	0.578262	-0.547728	1	12	1	0.00558659	179	2584	41269	Irp-1B
	dme00564	Glycerophospholipid metabolism	0.5793	-0.545934	1	58	4	0.0223464	179	2584	3.54175e+19	CG2201,wun2,CG11438,CG4729
	ko00564	Glycerophospholipid metabolism	0.5793	-0.545934	1	58	4	0.0223464	179	2584	3.54175e+19	CG2201,wun2,CG11438,CG4729
	ko00260	Glycine, serine and threonine metabolism	0.588186	-0.530712	1	28	2	0.0111732	179	2584	4639134554	CG11899,CG6287
	dme00260	Glycine, serine and threonine metabolism	0.588186	-0.530712	1	28	2	0.0111732	179	2584	4639134554	CG11899,CG6287
	dme_M00050	Guanine ribonucleotide biosynthesis IMP => GDP,GTP	0.607613	-0.498217	1	13	1	0.00558659	179	2584	43661	CG15547
	dme00760	Nicotinate and nicotinamide metabolism	0.607613	-0.498217	1	13	1	0.00558659	179	2584	32822	CG32549
	ko00760	Nicotinate and nicotinamide metabolism	0.607613	-0.498217	1	13	1	0.00558659	179	2584	32822	CG32549
	ko00590	Arachidonic acid metabolism	0.607613	-0.498217	1	13	1	0.00558659	179	2584	38413	PHGPx
	M00050	Guanine ribonucleotide biosynthesis IMP => GDP,GTP	0.607613	-0.498217	1	13	1	0.00558659	179	2584	43661	CG15547
	dme00590	Arachidonic acid metabolism	0.607613	-0.498217	1	13	1	0.00558659	179	2584	38413	PHGPx
	dme00250	Alanine, aspartate and glutamate metabolism	0.607636	-0.498179	1	29	2	0.0111732	179	2584	4337334791	Gfat2,b
	ko00250	Alanine, aspartate and glutamate metabolism	0.607636	-0.498179	1	29	2	0.0111732	179	2584	4337334791	Gfat2,b
	dme_M00003	Gluconeogenesis, oxaloacetate => fructose-6P	0.634932	-0.454237	1	14	1	0.00558659	179	2584	35265	fbp
	M00003	Gluconeogenesis, oxaloacetate => fructose-6P	0.634932	-0.454237	1	14	1	0.00558659	179	2584	35265	fbp
	dme00310	Lysine degradation	0.644438	-0.439377	1	31	2	0.0111732	179	2584	4324439265	CG31075,Plod
	ko00310	Lysine degradation	0.644438	-0.439377	1	31	2	0.0111732	179	2584	4324439265	CG31075,Plod
	M00049	Adenine ribonucleotide biosynthesis, IMP => ADP,ATP	0.660359	-0.414972	1	15	1	0.00558659	179	2584	43661	CG15547
	dme_M00049	Adenine ribonucleotide biosynthesis, IMP => ADP,ATP	0.660359	-0.414972	1	15	1	0.00558659	179	2584	43661	CG15547
	M00158	F-type ATPase, eukaryotes	0.684024	-0.379762	1	16	1	0.00558659	179	2584	326144	CG31477
	dme_M00158	F-type ATPase, eukaryotes	0.684024	-0.379762	1	16	1	0.00558659	179	2584	326144	CG31477
	ko04350	TGF-beta signaling pathway	0.69448	-0.364591	1	34	2	0.0111732	179	2584	4426333753	Sara,tkv
	dme04350	TGF-beta signaling pathway	0.69448	-0.364591	1	34	2	0.0111732	179	2584	4426333753	Sara,tkv
	ko00010	Glycolysis / Gluconeogenesis	0.69795	-0.359608	1	51	3	0.0167598	179	2584	432443526540946	CG31075,fbp,CG2767
	dme00010	Glycolysis / Gluconeogenesis	0.69795	-0.359608	1	51	3	0.0167598	179	2584	432443526540946	CG31075,fbp,CG2767
	ko04140	Regulation of autophagy	0.726547	-0.319453	1	18	1	0.00558659	179	2584	39454	Atg1
	dme01210	2-Oxocarboxylic acid metabolism	0.726547	-0.319453	1	18	1	0.00558659	179	2584	41269	Irp-1B
	dme04140	Regulation of autophagy	0.726547	-0.319453	1	18	1	0.00558659	179	2584	39454	Atg1
	ko01210	2-Oxocarboxylic acid metabolism	0.726547	-0.319453	1	18	1	0.00558659	179	2584	41269	Irp-1B
	M00352	Spliceosome, U2-snRNP	0.745622	-0.293536	1	19	1	0.00558659	179	2584	38720	CG13298
	dme_M00352	Spliceosome, U2-snRNP	0.745622	-0.293536	1	19	1	0.00558659	179	2584	38720	CG13298
	ko01200	Carbon metabolism	0.747957	-0.29041	1	105	6	0.0335196	179	2584	3.68394e+29	CG7848,CG12262,Irp-1B,fbp,CG11899,CG6287
	dme01200	Carbon metabolism	0.747957	-0.29041	1	105	6	0.0335196	179	2584	3.68394e+29	CG7848,CG12262,Irp-1B,fbp,CG11899,CG6287
	ko04630	Jak-STAT signaling pathway	0.763374	-0.270007	1	20	1	0.00558659	179	2584	33203	Pi3K21B
	dme04630	Jak-STAT signaling pathway	0.763374	-0.270007	1	20	1	0.00558659	179	2584	33203	Pi3K21B
	ko04391	Hippo signaling pathway - fly	0.767917	-0.264074	1	57	3	0.0167598	179	2584	3.44053e+16	lft,jub,p53
	dme04391	Hippo signaling pathway - fly	0.767917	-0.264074	1	57	3	0.0167598	179	2584	3.44053e+16	lft,jub,p53
	ko04070	Phosphatidylinositol signaling system	0.788906	-0.237108	1	41	2	0.0111732	179	2584	3320332279	Pi3K21B,CG15743
	dme04070	Phosphatidylinositol signaling system	0.788906	-0.237108	1	41	2	0.0111732	179	2584	3320332279	Pi3K21B,CG15743
	dme_M00341	Proteasome, 19S regulatory particle (PA700)	0.795266	-0.229079	1	22	1	0.00558659	179	2584	43635	Rpt6R
	M00341	Proteasome, 19S regulatory particle (PA700)	0.795266	-0.229079	1	22	1	0.00558659	179	2584	43635	Rpt6R
	ko00982	Drug metabolism - cytochrome P450	0.815685	-0.203727	1	62	3	0.0167598	179	2584	535023513837590	Ugt86Di,CG17323,Ugt58Fa
	dme00980	Metabolism of xenobiotics by cytochrome P450	0.815685	-0.203727	1	62	3	0.0167598	179	2584	535023513837590	Ugt86Di,CG17323,Ugt58Fa
	ko00980	Metabolism of xenobiotics by cytochrome P450	0.815685	-0.203727	1	62	3	0.0167598	179	2584	535023513837590	Ugt86Di,CG17323,Ugt58Fa
	dme00982	Drug metabolism - cytochrome P450	0.815685	-0.203727	1	62	3	0.0167598	179	2584	535023513837590	Ugt86Di,CG17323,Ugt58Fa
	ko00790	Folate biosynthesis	0.82288	-0.194945	1	24	1	0.00558659	179	2584	317887	l(3)72Dp
	dme00790	Folate biosynthesis	0.82288	-0.194945	1	24	1	0.00558659	179	2584	317887	l(3)72Dp
	dme01230	Biosynthesis of amino acids	0.832337	-0.183518	1	64	3	0.0167598	179	2584	412694639134554	Irp-1B,CG11899,CG6287
	ko01230	Biosynthesis of amino acids	0.832337	-0.183518	1	64	3	0.0167598	179	2584	412694639134554	Irp-1B,CG11899,CG6287
	ko04320	Dorso-ventral axis formation	0.857509	-0.153724	1	27	1	0.00558659	179	2584	31358	brn
	dme04320	Dorso-ventral axis formation	0.857509	-0.153724	1	27	1	0.00558659	179	2584	31358	brn
	dme04310	Wnt signaling pathway	0.870868	-0.138265	1	88	4	0.0223464	179	2584	3.88904e+19	nmo,nkd,Vang,fz3
	ko04310	Wnt signaling pathway	0.870868	-0.138265	1	88	4	0.0223464	179	2584	3.88904e+19	nmo,nkd,Vang,fz3
	dme00620	Pyruvate metabolism	0.872141	-0.136805	1	50	2	0.0111732	179	2584	3683943244	CG7848,CG31075
	ko00620	Pyruvate metabolism	0.872141	-0.136805	1	50	2	0.0111732	179	2584	3683943244	CG7848,CG31075
	ko03015	mRNA surveillance pathway	0.87478	-0.133783	1	70	3	0.0167598	179	2584	429943707037493	Smg6,pAbp,PpN58A
	dme03015	mRNA surveillance pathway	0.87478	-0.133783	1	70	3	0.0167598	179	2584	429943707037493	Smg6,pAbp,PpN58A
	dme00330	Arginine and proline metabolism	0.892393	-0.113849	1	53	2	0.0111732	179	2584	4324434396	CG31075,SamDC
	ko00330	Arginine and proline metabolism	0.892393	-0.113849	1	53	2	0.0111732	179	2584	4324434396	CG31075,SamDC
	dme00230	Purine metabolism	0.903133	-0.101886	1	131	6	0.0335196	179	2584	3.28224e+29	CG32549,Pde11,Lap1,Papss,Pde9,CG15547
	ko00230	Purine metabolism	0.903133	-0.101886	1	131	6	0.0335196	179	2584	3.28224e+29	CG32549,Pde11,Lap1,Papss,Pde9,CG15547
	ko00052	Galactose metabolism	0.920333	-0.0830195	1	35	1	0.00558659	179	2584	33839	Gal
	M00009	Citrate cycle (TCA cycle, Krebs cycle)	0.920333	-0.0830195	1	35	1	0.00558659	179	2584	41269	Irp-1B
	dme00052	Galactose metabolism	0.920333	-0.0830195	1	35	1	0.00558659	179	2584	33839	Gal
	dme_M00009	Citrate cycle (TCA cycle, Krebs cycle)	0.920333	-0.0830195	1	35	1	0.00558659	179	2584	41269	Irp-1B
	M00359	Aminoacyl-tRNA biosynthesis, eukaryotes	0.925928	-0.0769592	1	36	1	0.00558659	179	2584	34156	Aats-ala
	ko00562	Inositol phosphate metabolism	0.925928	-0.0769592	1	36	1	0.00558659	179	2584	32279	CG15743
	dme_M00359	Aminoacyl-tRNA biosynthesis, eukaryotes	0.925928	-0.0769592	1	36	1	0.00558659	179	2584	34156	Aats-ala
	dme00562	Inositol phosphate metabolism	0.925928	-0.0769592	1	36	1	0.00558659	179	2584	32279	CG15743
	dme00240	Pyrimidine metabolism	0.93228	-0.0701218	1	82	3	0.0167598	179	2584	328223351043661	CG32549,CG17224,CG15547
	ko00240	Pyrimidine metabolism	0.93228	-0.0701218	1	82	3	0.0167598	179	2584	328223351043661	CG32549,CG17224,CG15547
	dme00480	Glutathione metabolism	0.940382	-0.0614695	1	63	2	0.0111732	179	2584	3841353473	PHGPx,SP1029
	ko00480	Glutathione metabolism	0.940382	-0.0614695	1	63	2	0.0111732	179	2584	3841353473	PHGPx,SP1029
	ko03022	Basal transcription factors	0.940473	-0.0613724	1	39	1	0.00558659	179	2584	43284	TfIIA-L
	dme03022	Basal transcription factors	0.940473	-0.0613724	1	39	1	0.00558659	179	2584	43284	TfIIA-L
	dme00970	Aminoacyl-tRNA biosynthesis	0.952175	-0.0490066	1	42	1	0.00558659	179	2584	34156	Aats-ala
	ko00970	Aminoacyl-tRNA biosynthesis	0.952175	-0.0490066	1	42	1	0.00558659	179	2584	34156	Aats-ala
	ko00020	Citrate cycle (TCA cycle)	0.955543	-0.045476	1	43	1	0.00558659	179	2584	41269	Irp-1B
	dme00020	Citrate cycle (TCA cycle)	0.955543	-0.045476	1	43	1	0.00558659	179	2584	41269	Irp-1B
	dme03050	Proteasome	0.973356	-0.0270053	1	50	1	0.00558659	179	2584	43635	Rpt6R
	ko03050	Proteasome	0.973356	-0.0270053	1	50	1	0.00558659	179	2584	43635	Rpt6R
	ko03018	RNA degradation	0.978615	-0.0216171	1	53	1	0.00558659	179	2584	37070	pAbp
	dme03018	RNA degradation	0.978615	-0.0216171	1	53	1	0.00558659	179	2584	37070	pAbp
	M00177	Ribosome, eukaryotes	0.988215	-0.0118547	1	89	2	0.0111732	179	2584	3102244783	RpL22,RpL37A
	dme_M00177	Ribosome, eukaryotes	0.988215	-0.0118547	1	89	2	0.0111732	179	2584	3102244783	RpL22,RpL37A
	ko04120	Ubiquitin mediated proteolysis	0.993422	-0.00659955	1	98	2	0.0111732	179	2584	3400239753	CG4502,th
	dme04120	Ubiquitin mediated proteolysis	0.993422	-0.00659955	1	98	2	0.0111732	179	2584	3400239753	CG4502,th
	dme03040	Spliceosome	0.998913	-0.00108781	1	125	2	0.0111732	179	2584	335511438720	Spf45,CG13298
	ko03040	Spliceosome	0.998913	-0.00108781	1	125	2	0.0111732	179	2584	335511438720	Spf45,CG13298
	ko03010	Ribosome	0.999278	-0.000722574	1	131	2	0.0111732	179	2584	3102244783	RpL22,RpL37A
	dme03010	Ribosome	0.999278	-0.000722574	1	131	2	0.0111732	179	2584	3102244783	RpL22,RpL37A
	ko03013	RNA transport	0.999583	-0.000416963	1	139	2	0.0111732	179	2584	3707040589	pAbp,tacc
	dme03013	RNA transport	0.999583	-0.000416963	1	139	2	0.0111732	179	2584	3707040589	pAbp,tacc
	dme00190	Oxidative phosphorylation	0.999907	-9.32643e-05	1	126	1	0.00558659	179	2584	326144	CG31477
	ko00190	Oxidative phosphorylation	0.999907	-9.32643e-05	1	126	1	0.00558659	179	2584	326144	CG31477
	dme_M00007	Pentose phosphate pathway, non-oxidative phase, fructose 6P => ribose 5P	1	-6.95681e-12	1	5	0	0	179	2584
	M00073	N-glycan precursor trimming	1	-6.95681e-12	1	5	0	0	179	2584
	M00082	Fatty acid biosynthesis, initiation	1	-6.95681e-12	1	5	0	0	179	2584
	M00409	ESCRT-I complex	1	-6.95681e-12	1	5	0	0	179	2584
	M00307	Pyruvate oxidation, pyruvate => acetyl-CoA	1	-6.95681e-12	1	5	0	0	179	2584
	dme_M00082	Fatty acid biosynthesis, initiation	1	-6.95681e-12	1	5	0	0	179	2584
	dme_M00415	Fatty acid biosynthesis, elongation, endoplasmic reticulum	1	-6.95681e-12	1	5	0	0	179	2584
	dme_M00409	ESCRT-I complex	1	-6.95681e-12	1	5	0	0	179	2584
	M00405	THC complex	1	-6.95681e-12	1	5	0	0	179	2584
	dme_M00128	Ubiquinone biosynthesis, eukaryotes, 4-hydroxybenzoate => ubiquinone	1	-6.95681e-12	1	5	0	0	179	2584
	M00415	Fatty acid biosynthesis, elongation, endoplasmic reticulum	1	-6.95681e-12	1	5	0	0	179	2584
	M00006	Pentose phosphate pathway, oxidative phase, glucose 6P => ribulose 5P	1	-6.95681e-12	1	5	0	0	179	2584
	dme_M00120	Coenzyme A biosynthesis, pantothenate => CoA	1	-6.95681e-12	1	5	0	0	179	2584
	dme_M00307	Pyruvate oxidation, pyruvate => acetyl-CoA	1	-6.95681e-12	1	5	0	0	179	2584
	dme_M00006	Pentose phosphate pathway, oxidative phase, glucose 6P => ribulose 5P	1	-6.95681e-12	1	5	0	0	179	2584
	M00007	Pentose phosphate pathway, non-oxidative phase, fructose 6P => ribose 5P	1	-6.95681e-12	1	5	0	0	179	2584
	dme_M00405	THC complex	1	-6.95681e-12	1	5	0	0	179	2584
	M00289	RF-C complex	1	-6.95681e-12	1	5	0	0	179	2584
	M00128	Ubiquinone biosynthesis, eukaryotes, 4-hydroxybenzoate => ubiquinone	1	-6.95681e-12	1	5	0	0	179	2584
	M00395	Decapping complex	1	-6.95681e-12	1	5	0	0	179	2584
	M00120	Coenzyme A biosynthesis, pantothenate => CoA	1	-6.95681e-12	1	5	0	0	179	2584
	dme_M00073	N-glycan precursor trimming	1	-6.95681e-12	1	5	0	0	179	2584
	dme_M00395	Decapping complex	1	-6.95681e-12	1	5	0	0	179	2584
	dme_M00289	RF-C complex	1	-6.95681e-12	1	5	0	0	179	2584
	ko00232	Caffeine metabolism	1	-5.20361e-12	1	2	0	0	179	2584
	ko00290	Valine, leucine and isoleucine biosynthesis	1	-5.20361e-12	1	2	0	0	179	2584
	M00293	DNA polymerase zeta complex	1	-5.20361e-12	1	2	0	0	179	2584
	dme00290	Valine, leucine and isoleucine biosynthesis	1	-5.20361e-12	1	2	0	0	179	2584
	dme00232	Caffeine metabolism	1	-5.20361e-12	1	2	0	0	179	2584
	M00408	ESCRT-0 complex	1	-5.20361e-12	1	2	0	0	179	2584
	dme_M00294	DNA polymerase gamma complex	1	-5.20361e-12	1	2	0	0	179	2584
	dme00100	Steroid biosynthesis	1	-5.20361e-12	1	2	0	0	179	2584
	M00338	Cysteine biosynthesis, homocysteine + serine => cysteine	1	-5.20361e-12	1	2	0	0	179	2584
	dme_M00338	Cysteine biosynthesis, homocysteine + serine => cysteine	1	-5.20361e-12	1	2	0	0	179	2584
	ko00100	Steroid biosynthesis	1	-5.20361e-12	1	2	0	0	179	2584
	M00554	Nucleotide sugar biosynthesis, galactose => UDP-galactose	1	-5.20361e-12	1	2	0	0	179	2584
	dme_M00293	DNA polymerase zeta complex	1	-5.20361e-12	1	2	0	0	179	2584
	dme_M00408	ESCRT-0 complex	1	-5.20361e-12	1	2	0	0	179	2584
	dme_M00554	Nucleotide sugar biosynthesis, galactose => UDP-galactose	1	-5.20361e-12	1	2	0	0	179	2584
	M00294	DNA polymerase gamma complex	1	-5.20361e-12	1	2	0	0	179	2584
	M00400	p97-Ufd1-Npl4 complex	1	-4.13519e-12	1	3	0	0	179	2584
	dme00780	Biotin metabolism	1	-4.13519e-12	1	3	0	0	179	2584
	ko00785	Lipoic acid metabolism	1	-4.13519e-12	1	3	0	0	179	2584
	dme_M00288	RPA complex	1	-4.13519e-12	1	3	0	0	179	2584
	dme_M00058	Glycosaminoglycan biosynthesis, chondroitin sulfate backbone	1	-4.13519e-12	1	3	0	0	179	2584
	M00288	RPA complex	1	-4.13519e-12	1	3	0	0	179	2584
	dme_M00151	Cytochrome bc1 complex respiratory unit	1	-4.13519e-12	1	3	0	0	179	2584
	M00141	C1-unit interconversion, eukaryotes	1	-4.13519e-12	1	3	0	0	179	2584
	dme_M00015	Proline biosynthesis, glutamate => proline	1	-4.13519e-12	1	3	0	0	179	2584
	M00399	Cap binding complex	1	-4.13519e-12	1	3	0	0	179	2584
	M00291	MRN complex	1	-4.13519e-12	1	3	0	0	179	2584
	dme_M00400	p97-Ufd1-Npl4 complex	1	-4.13519e-12	1	3	0	0	179	2584
	dme00785	Lipoic acid metabolism	1	-4.13519e-12	1	3	0	0	179	2584
	M00046	Pyrimidine degradation, uracil => beta-alanine, thymine => 3-aminoisobutanoate	1	-4.13519e-12	1	3	0	0	179	2584
	dme00730	Thiamine metabolism	1	-4.13519e-12	1	3	0	0	179	2584
	dme_M00134	Polyamine biosynthesis, arginine => ornithine => putrescine	1	-4.13519e-12	1	3	0	0	179	2584
	dme_M00399	Cap binding complex	1	-4.13519e-12	1	3	0	0	179	2584
	M00151	Cytochrome bc1 complex respiratory unit	1	-4.13519e-12	1	3	0	0	179	2584
	M00058	Glycosaminoglycan biosynthesis, chondroitin sulfate backbone	1	-4.13519e-12	1	3	0	0	179	2584
	dme_M00086	beta-Oxidation, acyl-CoA synthesis	1	-4.13519e-12	1	3	0	0	179	2584
	ko00730	Thiamine metabolism	1	-4.13519e-12	1	3	0	0	179	2584
	dme_M00046	Pyrimidine degradation, uracil => beta-alanine, thymine => 3-aminoisobutanoate	1	-4.13519e-12	1	3	0	0	179	2584
	M00392	Ski complex	1	-4.13519e-12	1	3	0	0	179	2584
	M00410	ESCRT-II complex	1	-4.13519e-12	1	3	0	0	179	2584
	ko00780	Biotin metabolism	1	-4.13519e-12	1	3	0	0	179	2584
	M00051	Uridine monophosphate biosynthesis, glutamine (+ PRPP) => UMP	1	-4.13519e-12	1	3	0	0	179	2584
	M00134	Polyamine biosynthesis, arginine => ornithine => putrescine	1	-4.13519e-12	1	3	0	0	179	2584
	dme_M00141	C1-unit interconversion, eukaryotes	1	-4.13519e-12	1	3	0	0	179	2584
	dme_M00410	ESCRT-II complex	1	-4.13519e-12	1	3	0	0	179	2584
	dme00471	D-Glutamine and D-glutamate metabolism	1	-4.13519e-12	1	3	0	0	179	2584
	ko00460	Cyanoamino acid metabolism	1	-4.13519e-12	1	3	0	0	179	2584
	M00015	Proline biosynthesis, glutamate => proline	1	-4.13519e-12	1	3	0	0	179	2584
	M00086	beta-Oxidation, acyl-CoA synthesis	1	-4.13519e-12	1	3	0	0	179	2584
	dme_M00291	MRN complex	1	-4.13519e-12	1	3	0	0	179	2584
	dme_M00392	Ski complex	1	-4.13519e-12	1	3	0	0	179	2584
	dme_M00051	Uridine monophosphate biosynthesis, glutamine (+ PRPP) => UMP	1	-4.13519e-12	1	3	0	0	179	2584
	ko00471	D-Glutamine and D-glutamate metabolism	1	-4.13519e-12	1	3	0	0	179	2584
	dme00460	Cyanoamino acid metabolism	1	-4.13519e-12	1	3	0	0	179	2584
	M00384	Cul3-SPOP complex	1	-3.81061e-12	1	4	0	0	179	2584
	dme00400	Phenylalanine, tyrosine and tryptophan biosynthesis	1	-3.81061e-12	1	4	0	0	179	2584
	M00083	Fatty acid biosynthesis, elongation	1	-3.81061e-12	1	4	0	0	179	2584
	dme_M00263	DNA polymerase epsilon complex	1	-3.81061e-12	1	4	0	0	179	2584
	M00426	Survival motor neuron (SMN) complex	1	-3.81061e-12	1	4	0	0	179	2584
	dme_M00390	Exosome, archaea	1	-3.81061e-12	1	4	0	0	179	2584
	M00263	DNA polymerase epsilon complex	1	-3.81061e-12	1	4	0	0	179	2584
	dme00601	Glycosphingolipid biosynthesis - lacto and neolacto series	1	-3.81061e-12	1	4	0	0	179	2584
	dme_M00286	GINS complex	1	-3.81061e-12	1	4	0	0	179	2584
	dme_M00425	H/ACA ribonucleoprotein complex	1	-3.81061e-12	1	4	0	0	179	2584
	dme_M00083	Fatty acid biosynthesis, elongation	1	-3.81061e-12	1	4	0	0	179	2584
	ko00533	Glycosaminoglycan biosynthesis - keratan sulfate	1	-3.81061e-12	1	4	0	0	179	2584
	dme_M00261	DNA polymerase alpha / primase complex	1	-3.81061e-12	1	4	0	0	179	2584
	ko00400	Phenylalanine, tyrosine and tryptophan biosynthesis	1	-3.81061e-12	1	4	0	0	179	2584
	dme00533	Glycosaminoglycan biosynthesis - keratan sulfate	1	-3.81061e-12	1	4	0	0	179	2584
	dme_M00118	Glutathione biosynthesis, glutamate => glutathione	1	-3.81061e-12	1	4	0	0	179	2584
	M00286	GINS complex	1	-3.81061e-12	1	4	0	0	179	2584
	M00425	H/ACA ribonucleoprotein complex	1	-3.81061e-12	1	4	0	0	179	2584
	dme_M00384	Cul3-SPOP complex	1	-3.81061e-12	1	4	0	0	179	2584
	ko00601	Glycosphingolipid biosynthesis - lacto and neolacto series	1	-3.81061e-12	1	4	0	0	179	2584
	M00118	Glutathione biosynthesis, glutamate => glutathione	1	-3.81061e-12	1	4	0	0	179	2584
	M00261	DNA polymerase alpha / primase complex	1	-3.81061e-12	1	4	0	0	179	2584
	dme_M00426	Survival motor neuron (SMN) complex	1	-3.81061e-12	1	4	0	0	179	2584
	M00390	Exosome, archaea	1	-3.81061e-12	1	4	0	0	179	2584
	ko03450	Non-homologous end-joining	1	-1.57841e-12	1	6	0	0	179	2584
	dme_M00285	MCM complex	1	-1.57841e-12	1	6	0	0	179	2584
	M00383	ECV complex	1	-1.57841e-12	1	6	0	0	179	2584
	M00284	Origin recognition complex	1	-1.57841e-12	1	6	0	0	179	2584
	dme03450	Non-homologous end-joining	1	-1.57841e-12	1	6	0	0	179	2584
	M00404	COPII complex	1	-1.57841e-12	1	6	0	0	179	2584
	ko00061	Fatty acid biosynthesis	1	-1.57841e-12	1	6	0	0	179	2584
	dme_M00284	Origin recognition complex	1	-1.57841e-12	1	6	0	0	179	2584
	dme00061	Fatty acid biosynthesis	1	-1.57841e-12	1	6	0	0	179	2584
	dme_M00404	COPII complex	1	-1.57841e-12	1	6	0	0	179	2584
	M00285	MCM complex	1	-1.57841e-12	1	6	0	0	179	2584
	dme_M00383	ECV complex	1	-1.57841e-12	1	6	0	0	179	2584
	ko00472	D-Arginine and D-ornithine metabolism	1	-1.32527e-12	1	1	0	0	179	2584
	ko00300	Lysine biosynthesis	1	-1.32527e-12	1	1	0	0	179	2584
	dme00300	Lysine biosynthesis	1	-1.32527e-12	1	1	0	0	179	2584
	M00005	PRPP biosynthesis, ribose 5P => PRPP	1	-1.32527e-12	1	1	0	0	179	2584
	dme_M00005	PRPP biosynthesis, ribose 5P => PRPP	1	-1.32527e-12	1	1	0	0	179	2584
	dme00472	D-Arginine and D-ornithine metabolism	1	-1.32527e-12	1	1	0	0	179	2584
	M00398	Sm core complex	1	-9.64094e-13	1	7	0	0	179	2584
	M00397	Lsm 1-7 complex	1	-9.64094e-13	1	7	0	0	179	2584
	dme_M00148	Succinate dehydrogenase (ubiquinone)	1	-9.64094e-13	1	7	0	0	179	2584
	M00048	Inosine monophosphate biosynthesis, PRPP + glutamine => IMP	1	-9.64094e-13	1	7	0	0	179	2584
	dme_M00048	Inosine monophosphate biosynthesis, PRPP + glutamine => IMP	1	-9.64094e-13	1	7	0	0	179	2584
	M00148	Succinate dehydrogenase (ubiquinone)	1	-9.64094e-13	1	7	0	0	179	2584
	M00396	Lsm 2-8 complex	1	-9.64094e-13	1	7	0	0	179	2584
	ko00591	Linoleic acid metabolism	1	-9.64094e-13	1	7	0	0	179	2584
	dme00591	Linoleic acid metabolism	1	-9.64094e-13	1	7	0	0	179	2584
	dme_M00398	Sm core complex	1	-9.64094e-13	1	7	0	0	179	2584
	dme_M00396	Lsm 2-8 complex	1	-9.64094e-13	1	7	0	0	179	2584
	dme_M00397	Lsm 1-7 complex	1	-9.64094e-13	1	7	0	0	179	2584
	dme_M00180	RNA polymerase II, eukaryotes	1	3.32808e-13	1	12	0	0	179	2584
	dme00670	One carbon pool by folate	1	3.32808e-13	1	12	0	0	179	2584
	M00180	RNA polymerase II, eukaryotes	1	3.32808e-13	1	12	0	0	179	2584
	dme_M00182	RNA polymerase I, eukaryotes	1	3.32808e-13	1	12	0	0	179	2584
	ko00670	One carbon pool by folate	1	3.32808e-13	1	12	0	0	179	2584
	M00182	RNA polymerase I, eukaryotes	1	3.32808e-13	1	12	0	0	179	2584
	dme_M00295	BRCA1-associated genome surveillance complex (BASC)	1	1.56672e-12	1	16	0	0	179	2584
	M00295	BRCA1-associated genome surveillance complex (BASC)	1	1.56672e-12	1	16	0	0	179	2584
	M00181	RNA polymerase III, eukaryotes	1	1.56672e-12	1	16	0	0	179	2584
	dme_M00181	RNA polymerase III, eukaryotes	1	1.56672e-12	1	16	0	0	179	2584
	dme00360	Phenylalanine metabolism	1	1.57571e-12	1	10	0	0	179	2584
	ko00360	Phenylalanine metabolism	1	1.57571e-12	1	10	0	0	179	2584
	dme00770	Pantothenate and CoA biosynthesis	1	1.57571e-12	1	10	0	0	179	2584
	M00290	Holo-TFIIH complex	1	1.57571e-12	1	10	0	0	179	2584
	dme_M00290	Holo-TFIIH complex	1	1.57571e-12	1	10	0	0	179	2584
	ko00770	Pantothenate and CoA biosynthesis	1	1.57571e-12	1	10	0	0	179	2584
	M00095	C5 isoprenoid biosynthesis, mevalonate pathway	1	2.11882e-12	1	8	0	0	179	2584
	M00632	Galactose degradation, Leloir pathway, galactose => alpha-D-glucose-1P	1	2.11882e-12	1	8	0	0	179	2584
	M00549	Nucleotide sugar biosynthesis, glucose => UDP-glucose	1	2.11882e-12	1	8	0	0	179	2584
	M00428	eIF4F complex	1	2.11882e-12	1	8	0	0	179	2584
	M00412	ESCRT-III complex	1	2.11882e-12	1	8	0	0	179	2584
	dme_M00412	ESCRT-III complex	1	2.11882e-12	1	8	0	0	179	2584
	dme_M00428	eIF4F complex	1	2.11882e-12	1	8	0	0	179	2584
	dme_M00632	Galactose degradation, Leloir pathway, galactose => alpha-D-glucose-1P	1	2.11882e-12	1	8	0	0	179	2584
	dme_M00549	Nucleotide sugar biosynthesis, glucose => UDP-glucose	1	2.11882e-12	1	8	0	0	179	2584
	dme_M00095	C5 isoprenoid biosynthesis, mevalonate pathway	1	2.11882e-12	1	8	0	0	179	2584
	dme_M00380	SCF-BTRC complex	1	2.13676e-12	1	11	0	0	179	2584
	M00004	Pentose phosphate pathway (Pentose phosphate cycle)	1	2.13676e-12	1	11	0	0	179	2584
	M00387	SCF-FBW7 complex	1	2.13676e-12	1	11	0	0	179	2584
	M00380	SCF-BTRC complex	1	2.13676e-12	1	11	0	0	179	2584
	dme_M00381	SCF-SKP2 complex	1	2.13676e-12	1	11	0	0	179	2584
	M00130	Inositol phosphate metabolism, PI=> PIP2 => Ins(1,4,5)P3 => Ins(1,3,4,5)P4	1	2.13676e-12	1	11	0	0	179	2584
	M00381	SCF-SKP2 complex	1	2.13676e-12	1	11	0	0	179	2584
	dme_M00387	SCF-FBW7 complex	1	2.13676e-12	1	11	0	0	179	2584
	dme_M00130	Inositol phosphate metabolism, PI=> PIP2 => Ins(1,4,5)P3 => Ins(1,3,4,5)P4	1	2.13676e-12	1	11	0	0	179	2584
	dme_M00004	Pentose phosphate pathway (Pentose phosphate cycle)	1	2.13676e-12	1	11	0	0	179	2584
	ko00130	Ubiquinone and other terpenoid-quinone biosynthesis	1	2.21351e-12	1	9	0	0	179	2584
	dme04711	Circadian rhythm - fly	1	2.21351e-12	1	9	0	0	179	2584
	dme00130	Ubiquinone and other terpenoid-quinone biosynthesis	1	2.21351e-12	1	9	0	0	179	2584
	M00351	Spliceosome, U1-snRNP	1	2.21351e-12	1	9	0	0	179	2584
	M00406	TREX complex	1	2.21351e-12	1	9	0	0	179	2584
	ko04122	Sulfur relay system	1	2.21351e-12	1	9	0	0	179	2584
	M00391	Exosome, eukaryotes	1	2.21351e-12	1	9	0	0	179	2584
	dme02010	ABC transporters	1	2.21351e-12	1	9	0	0	179	2584
	dme_M00351	Spliceosome, U1-snRNP	1	2.21351e-12	1	9	0	0	179	2584
	ko02010	ABC transporters	1	2.21351e-12	1	9	0	0	179	2584
	dme_M00391	Exosome, eukaryotes	1	2.21351e-12	1	9	0	0	179	2584
	dme04122	Sulfur relay system	1	2.21351e-12	1	9	0	0	179	2584
	dme_M00406	TREX complex	1	2.21351e-12	1	9	0	0	179	2584
	dme_M00147	NADH dehydrogenase (ubiquinone) 1 beta subcomplex	1	3.39647e-12	1	13	0	0	179	2584
	M00147	NADH dehydrogenase (ubiquinone) 1 beta subcomplex	1	3.39647e-12	1	13	0	0	179	2584
	ko00740	Riboflavin metabolism	1	3.39647e-12	1	13	0	0	179	2584
	dme00740	Riboflavin metabolism	1	3.39647e-12	1	13	0	0	179	2584
	M00389	APC/C complex	1	3.49899e-12	1	15	0	0	179	2584
	dme_M00389	APC/C complex	1	3.49899e-12	1	15	0	0	179	2584
	dme_M00002	Glycolysis, core module involving three-carbon compounds	1	3.49899e-12	1	15	0	0	179	2584
	M00002	Glycolysis, core module involving three-carbon compounds	1	3.49899e-12	1	15	0	0	179	2584
	dme_M00143	NADH dehydrogenase (ubiquinone) Fe-S protein/flavoprotein complex, mitochondria	1	3.7295e-12	1	14	0	0	179	2584
	M00143	NADH dehydrogenase (ubiquinone) Fe-S protein/flavoprotein complex, mitochondria	1	3.7295e-12	1	14	0	0	179	2584
	ko00981	Insect hormone biosynthesis	1	3.7295e-12	1	14	0	0	179	2584
	dme00981	Insect hormone biosynthesis	1	3.7295e-12	1	14	0	0	179	2584
	dme_M00146	NADH dehydrogenase (ubiquinone) 1 alpha subcomplex	1	3.7295e-12	1	14	0	0	179	2584
	M00146	NADH dehydrogenase (ubiquinone) 1 alpha subcomplex	1	3.7295e-12	1	14	0	0	179	2584
	M00353	Spliceosome, Prp19/CDC5L complex	1	4.89925e-12	1	17	0	0	179	2584
	dme_M00353	Spliceosome, Prp19/CDC5L complex	1	4.89925e-12	1	17	0	0	179	2584
	dme00910	Nitrogen metabolism	1	4.89925e-12	1	17	0	0	179	2584
	dme_M00430	Exon junction complex (EJC)	1	4.89925e-12	1	17	0	0	179	2584
	M00430	Exon junction complex (EJC)	1	4.89925e-12	1	17	0	0	179	2584
	ko00910	Nitrogen metabolism	1	4.89925e-12	1	17	0	0	179	2584
	dme_M00154	Cytochrome c oxidase	1	5.59726e-12	1	19	0	0	179	2584
	dme00563	Glycosylphosphatidylinositol(GPI)-anchor biosynthesis	1	5.59726e-12	1	19	0	0	179	2584
	M00154	Cytochrome c oxidase	1	5.59726e-12	1	19	0	0	179	2584
	ko00563	Glycosylphosphatidylinositol(GPI)-anchor biosynthesis	1	5.59726e-12	1	19	0	0	179	2584
	dme03440	Homologous recombination	1	6.76206e-12	1	20	0	0	179	2584
	dme03410	Base excision repair	1	6.76206e-12	1	20	0	0	179	2584
	ko03430	Mismatch repair	1	6.76206e-12	1	20	0	0	179	2584
	ko03410	Base excision repair	1	6.76206e-12	1	20	0	0	179	2584
	dme03430	Mismatch repair	1	6.76206e-12	1	20	0	0	179	2584
	ko03440	Homologous recombination	1	6.76206e-12	1	20	0	0	179	2584
	dme04013	MAPK signaling pathway - fly	1	7.09118e-12	1	18	0	0	179	2584
	ko00350	Tyrosine metabolism	1	7.09118e-12	1	18	0	0	179	2584
	ko04013	MAPK signaling pathway - fly	1	7.09118e-12	1	18	0	0	179	2584
	dme00900	Terpenoid backbone biosynthesis	1	7.09118e-12	1	18	0	0	179	2584
	dme00350	Tyrosine metabolism	1	7.09118e-12	1	18	0	0	179	2584
	ko00900	Terpenoid backbone biosynthesis	1	7.09118e-12	1	18	0	0	179	2584
	M00011	Citrate cycle, second carbon oxidation, 2-oxoglutarate => oxaloacetate	1	8.26768e-12	1	23	0	0	179	2584
	dme_M00011	Citrate cycle, second carbon oxidation, 2-oxoglutarate => oxaloacetate	1	8.26768e-12	1	23	0	0	179	2584
	ko04340	Hedgehog signaling pathway	1	1.15352e-11	1	24	0	0	179	2584
	M00001	Glycolysis (Embden-Meyerhof pathway), glucose => pyruvate	1	1.15352e-11	1	24	0	0	179	2584
	dme04340	Hedgehog signaling pathway	1	1.15352e-11	1	24	0	0	179	2584
	dme_M00001	Glycolysis (Embden-Meyerhof pathway), glucose => pyruvate	1	1.15352e-11	1	24	0	0	179	2584
	dme03020	RNA polymerase	1	1.21378e-11	1	28	0	0	179	2584
	ko03020	RNA polymerase	1	1.21378e-11	1	28	0	0	179	2584
	dme03460	Fanconi anemia pathway	1	1.23168e-11	1	26	0	0	179	2584
	ko03460	Fanconi anemia pathway	1	1.23168e-11	1	26	0	0	179	2584
	dme04330	Notch signaling pathway	1	1.26471e-11	1	22	0	0	179	2584
	ko04330	Notch signaling pathway	1	1.26471e-11	1	22	0	0	179	2584
	dme_M00340	Proteasome, 20S core particle	1	1.34606e-11	1	25	0	0	179	2584
	M00340	Proteasome, 20S core particle	1	1.34606e-11	1	25	0	0	179	2584
	dme_M00160	V-type ATPase, eukaryotes	1	1.46838e-11	1	31	0	0	179	2584
	M00160	V-type ATPase, eukaryotes	1	1.46838e-11	1	31	0	0	179	2584
	M00354	Spliceosome, U4/U6.U5 tri-snRNP	1	1.52699e-11	1	30	0	0	179	2584
	dme_M00354	Spliceosome, U4/U6.U5 tri-snRNP	1	1.52699e-11	1	30	0	0	179	2584
	dme_M00427	Nuclear pore complex	1	1.53446e-11	1	33	0	0	179	2584
	M00427	Nuclear pore complex	1	1.53446e-11	1	33	0	0	179	2584
	dme04745	Phototransduction - fly	1	1.5929e-11	1	27	0	0	179	2584
	ko04745	Phototransduction - fly	1	1.5929e-11	1	27	0	0	179	2584
	M00355	Spliceosome, 35S U5-snRNP	1	1.67034e-11	1	40	0	0	179	2584
	dme_M00355	Spliceosome, 35S U5-snRNP	1	1.67034e-11	1	40	0	0	179	2584
	ko03420	Nucleotide excision repair	1	1.68439e-11	1	39	0	0	179	2584
	dme03420	Nucleotide excision repair	1	1.68439e-11	1	39	0	0	179	2584
	ko03030	DNA replication	1	2.10528e-11	1	35	0	0	179	2584
	dme03030	DNA replication	1	2.10528e-11	1	35	0	0	179	2584
	ko04080	Neuroactive ligand-receptor interaction	1	2.17934e-11	1	44	0	0	179	2584
	dme04080	Neuroactive ligand-receptor interaction	1	2.17934e-11	1	44	0	0	179	2584
	dme03008	Ribosome biogenesis in eukaryotes	1	3.05056e-11	1	86	0	0	179	2584
	ko03008	Ribosome biogenesis in eukaryotes	1	3.05056e-11	1	86	0	0	179	2584

## Sheet: Cl4
Significant Kegg terms	TermID	Term	Enrichment	logP	FDR_BH	Genes in Term	Target Genes in Term	Fraction of Targets in Term	Total Target Genes	Total Genes	Entrez Gene IDs	Gene Symbols
FDR_BH p<0.01	dme04330	Notch signaling pathway	2.39621e-05	-10.639	0.0058468	22	8	0.0509554	157	2584	4.29643e+39	nct,numb,N,Su(H),Psn,aph-1,Dl,dsh
FDR_BH p<0.01	ko04330	Notch signaling pathway	2.39621e-05	-10.639	0.0058468	22	8	0.0509554	157	2584	4.29643e+39	nct,numb,N,Su(H),Psn,aph-1,Dl,dsh
FDR_BH p<0.05	ko00603	Glycosphingolipid biosynthesis - globo series	0.000397716	-7.82977	0.048521	7	4	0.0254777	157	2584	3.18083e+20	Hexo2,CG5731,fdl,alpha4GT1
FDR_BH p<0.05	dme00603	Glycosphingolipid biosynthesis - globo series	0.000397716	-7.82977	0.048521	7	4	0.0254777	157	2584	3.18083e+20	Hexo2,CG5731,fdl,alpha4GT1
Significant Kegg terms	ko04320	Dorso-ventral axis formation	0.000844821	-7.07639	0.068712	27	7	0.044586	157	2584	3.36114e+34	capu,br,phl,N,Cf2,Sos,Egfr
Enrichment p<0.01	dme04320	Dorso-ventral axis formation	0.000844821	-7.07639	0.068712	27	7	0.044586	157	2584	3.36114e+34	capu,br,phl,N,Cf2,Sos,Egfr
	ko04391	Hippo signaling pathway - fly	0.00185383	-6.2905	0.11308	57	10	0.0636943	157	2584	2.52554e+50	sav,sd,d,ed,mats,Patj,Mad,aPKC,Rassf,Act42A
	dme04391	Hippo signaling pathway - fly	0.00185383	-6.2905	0.11308	57	10	0.0636943	157	2584	2.52554e+50	sav,sd,d,ed,mats,Patj,Mad,aPKC,Rassf,Act42A
	dme04512	ECM-receptor interaction	0.00309233	-5.77883	0.15091	11	4	0.0254777	157	2584	3.40684e+19	LanB1,LanA,mys,LanB2
Enrichment p<0.01	ko04512	ECM-receptor interaction	0.00309233	-5.77883	0.15091	11	4	0.0254777	157	2584	3.40684e+19	LanB1,LanA,mys,LanB2
	ko04340	Hedgehog signaling pathway	0.012866	-4.35317	0.52322	24	5	0.0318471	157	2584	4.07013e+24	Rab23,Wnt5,Su(fu),hh,ptc
	dme04340	Hedgehog signaling pathway	0.012866	-4.35317	0.52322	24	5	0.0318471	157	2584	4.07013e+24	Rab23,Wnt5,Su(fu),hh,ptc
	dme04310	Wnt signaling pathway	0.0158892	-4.14211	0.55385	88	11	0.0700637	157	2584	4.37255e+54	Med,fz,arr,Psn,fz4,norpA,Wnt5,dsh,arm,pk,shf
	ko04310	Wnt signaling pathway	0.0158892	-4.14211	0.55385	88	11	0.0700637	157	2584	4.37255e+54	Med,fz,arr,Psn,fz4,norpA,Wnt5,dsh,arm,pk,shf
	M00395	Decapping complex	0.0324834	-3.42703	0.86183	5	2	0.0127389	157	2584	3995739722	Edc3,Dcp2
	dme_M00395	Decapping complex	0.0324834	-3.42703	0.86183	5	2	0.0127389	157	2584	3995739722	Edc3,Dcp2
	ko04120	Ubiquitin mediated proteolysis	0.0329039	-3.41416	0.86183	98	11	0.0700637	157	2584	3.12143e+54	CG2924,ben,Su(dx),Ubc-E2H,Iap2,Cdc27,CG9934,ago,UbcD2,Keap1,CG10254
	dme04120	Ubiquitin mediated proteolysis	0.0329039	-3.41416	0.86183	98	11	0.0700637	157	2584	3.12143e+54	CG2924,ben,Su(dx),Ubc-E2H,Iap2,Cdc27,CG9934,ago,UbcD2,Keap1,CG10254
	ko04144	Endocytosis	0.0356296	-3.33458	0.86183	87	10	0.0636943	157	2584	3.17384e+49	Smox,TSG101,Chc,Su(dx),Ubpy,htl,aPKC,Stam,ALiX,Egfr
	dme04144	Endocytosis	0.0356296	-3.33458	0.86183	87	10	0.0636943	157	2584	3.17384e+49	Smox,TSG101,Chc,Su(dx),Ubpy,htl,aPKC,Stam,ALiX,Egfr
	ko03018	RNA degradation	0.0388529	-3.24797	0.86183	53	7	0.044586	157	2584	3.53394e+34	CG9323,Edc3,twin,Cnot4,CG11486,Trf4-1,Dcp2
	dme03018	RNA degradation	0.0388529	-3.24797	0.86183	53	7	0.044586	157	2584	3.53394e+34	CG9323,Edc3,twin,Cnot4,CG11486,Trf4-1,Dcp2
	dme04142	Lysosome	0.0435912	-3.1329	0.87848	90	10	0.0636943	157	2584	3.16473e+50	cm,CG5731,vsg,CG8596,Chc,CG12582,CG7049,Hexo2,Gga,fdl
	ko04142	Lysosome	0.0435912	-3.1329	0.87848	90	10	0.0636943	157	2584	3.16473e+50	cm,CG5731,vsg,CG8596,Chc,CG12582,CG7049,Hexo2,Gga,fdl
	dme00604	Glycosphingolipid biosynthesis - ganglio series	0.0468042	-3.06178	0.87848	6	2	0.0127389	157	2584	31808250735	Hexo2,fdl
	ko00604	Glycosphingolipid biosynthesis - ganglio series	0.0468042	-3.06178	0.87848	6	2	0.0127389	157	2584	31808250735	Hexo2,fdl
	ko04350	TGF-beta signaling pathway	0.0517494	-2.96134	0.90192	34	5	0.0318471	157	2584	3.77783e+24	gbb,Smox,Med,sax,Mad
	dme04350	TGF-beta signaling pathway	0.0517494	-2.96134	0.90192	34	5	0.0318471	157	2584	3.77783e+24	gbb,Smox,Med,sax,Mad
	dme00430	Taurine and hypotaurine metabolism	0.0629559	-2.76532	1	7	2	0.0127389	157	2584	3890132164	CG7550,CG1492
	ko00430	Taurine and hypotaurine metabolism	0.0629559	-2.76532	1	7	2	0.0127389	157	2584	3890132164	CG7550,CG1492
	ko00510	N-Glycan biosynthesis	0.0701614	-2.65696	1	37	5	0.0318471	157	2584	3.30824e+25	CG1518,CG9384,Alg10,CG14476,alpha-Man-II
	dme00510	N-Glycan biosynthesis	0.0701614	-2.65696	1	37	5	0.0318471	157	2584	3.30824e+25	CG1518,CG9384,Alg10,CG14476,alpha-Man-II
	dme04068	FoxO signaling pathway	0.0856892	-2.45703	1	51	6	0.0382166	157	2584	3.17383e+29	Smox,homer,Med,Sir2,Sos,Egfr
	dme04013	MAPK signaling pathway - fly	0.091787	-2.38828	1	18	3	0.0191083	157	2584	312213479037455	phl,Sos,Egfr
	ko04140	Regulation of autophagy	0.091787	-2.38828	1	18	3	0.0191083	157	2584	316663714140998	Atg5,Atg7,Atg13
	ko04013	MAPK signaling pathway - fly	0.091787	-2.38828	1	18	3	0.0191083	157	2584	312213479037455	phl,Sos,Egfr
	dme04140	Regulation of autophagy	0.091787	-2.38828	1	18	3	0.0191083	157	2584	316663714140998	Atg5,Atg7,Atg13
	dme04711	Circadian rhythm - fly	0.0996886	-2.3057	1	9	2	0.0127389	157	2584	3375940162	vri,cyc
	dme00310	Lysine degradation	0.115235	-2.16079	1	31	4	0.0254777	157	2584	3.09714e+19	G9a,trx,gpp,Hmt4-20
	ko00310	Lysine degradation	0.115235	-2.16079	1	31	4	0.0254777	157	2584	3.09714e+19	G9a,trx,gpp,Hmt4-20
	ko04630	Jak-STAT signaling pathway	0.117536	-2.14101	1	20	3	0.0191083	157	2584	345053208034790	Stam,hop,Sos
	dme04630	Jak-STAT signaling pathway	0.117536	-2.14101	1	20	3	0.0191083	157	2584	345053208034790	Stam,hop,Sos
	M00408	ESCRT-0 complex	0.117848	-2.13836	1	2	1	0.00636943	157	2584	34505	Stam
	dme00100	Steroid biosynthesis	0.117848	-2.13836	1	2	1	0.00636943	157	2584	32300	CG1998
	ko00100	Steroid biosynthesis	0.117848	-2.13836	1	2	1	0.00636943	157	2584	32300	CG1998
	dme_M00408	ESCRT-0 complex	0.117848	-2.13836	1	2	1	0.00636943	157	2584	34505	Stam
	ko03015	mRNA surveillance pathway	0.12928	-2.04577	1	70	7	0.044586	157	2584	3.48044e+34	Smg5,btz,CG32568,cbc,Acn,sbr,hrg
	dme03015	mRNA surveillance pathway	0.12928	-2.04577	1	70	7	0.044586	157	2584	3.48044e+34	Smg5,btz,CG32568,cbc,Acn,sbr,hrg
	M00130	Inositol phosphate metabolism, PI=> PIP2 => Ins(1,4,5)P3 => Ins(1,3,4,5)P4	0.140802	-1.9604	1	11	2	0.0127389	157	2584	3137645374	norpA,fwd
	dme_M00130	Inositol phosphate metabolism, PI=> PIP2 => Ins(1,4,5)P3 => Ins(1,3,4,5)P4	0.140802	-1.9604	1	11	2	0.0127389	157	2584	3137645374	norpA,fwd
	ko00511	Other glycan degradation	0.145626	-1.92671	1	22	3	0.0191083	157	2584	3180825073540520	Hexo2,fdl,CG12582
	dme00511	Other glycan degradation	0.145626	-1.92671	1	22	3	0.0191083	157	2584	3180825073540520	Hexo2,fdl,CG12582
	dme00592	alpha-Linolenic acid metabolism	0.162511	-1.81701	1	12	2	0.0127389	157	2584	3744531402	Acox57D-p,CG3009
	ko00592	alpha-Linolenic acid metabolism	0.162511	-1.81701	1	12	2	0.0127389	157	2584	3744531402	Acox57D-p,CG3009
	ko00460	Cyanoamino acid metabolism	0.171487	-1.76325	1	3	1	0.00636943	157	2584	32164	CG1492
	dme00460	Cyanoamino acid metabolism	0.171487	-1.76325	1	3	1	0.00636943	157	2584	32164	CG1492
	ko04150	mTOR signaling pathway	0.171802	-1.76141	1	36	4	0.0254777	157	2584	3.29194e+19	rictor,sima,Tor,raptor
	dme04150	mTOR signaling pathway	0.171802	-1.76141	1	36	4	0.0254777	157	2584	3.29194e+19	rictor,sima,Tor,raptor
	ko00590	Arachidonic acid metabolism	0.184767	-1.68866	1	13	2	0.0127389	157	2584	3216431402	CG1492,CG3009
	dme00590	Arachidonic acid metabolism	0.184767	-1.68866	1	13	2	0.0127389	157	2584	3216431402	CG1492,CG3009
	dme00531	Glycosaminoglycan degradation	0.253436	-1.37264	1	16	2	0.0127389	157	2584	31808250735	Hexo2,fdl
	ko00531	Glycosaminoglycan degradation	0.253436	-1.37264	1	16	2	0.0127389	157	2584	31808250735	Hexo2,fdl
	M00073	N-glycan precursor trimming	0.269235	-1.31217	1	5	1	0.00636943	157	2584	49953	CG14476
	M00409	ESCRT-I complex	0.269235	-1.31217	1	5	1	0.00636943	157	2584	39881	TSG101
	dme_M00059	Glycosaminoglycan biosynthesis, heparan sulfate backbone	0.269235	-1.31217	1	5	1	0.00636943	157	2584	37198	botv
	dme_M00415	Fatty acid biosynthesis, elongation, endoplasmic reticulum	0.269235	-1.31217	1	5	1	0.00636943	157	2584	34614	CG6746
	dme_M00409	ESCRT-I complex	0.269235	-1.31217	1	5	1	0.00636943	157	2584	39881	TSG101
	M00059	Glycosaminoglycan biosynthesis, heparan sulfate backbone	0.269235	-1.31217	1	5	1	0.00636943	157	2584	37198	botv
	M00415	Fatty acid biosynthesis, elongation, endoplasmic reticulum	0.269235	-1.31217	1	5	1	0.00636943	157	2584	34614	CG6746
	dme_M00073	N-glycan precursor trimming	0.269235	-1.31217	1	5	1	0.00636943	157	2584	49953	CG14476
	dme_M00430	Exon junction complex (EJC)	0.276573	-1.28528	1	17	2	0.0127389	157	2584	4333135173	btz,Acn
	dme01040	Biosynthesis of unsaturated fatty acids	0.276573	-1.28528	1	17	2	0.0127389	157	2584	3461437445	CG6746,Acox57D-p
	M00430	Exon junction complex (EJC)	0.276573	-1.28528	1	17	2	0.0127389	157	2584	4333135173	btz,Acn
	ko01040	Biosynthesis of unsaturated fatty acids	0.276573	-1.28528	1	17	2	0.0127389	157	2584	3461437445	CG6746,Acox57D-p
	dme00750	Vitamin B6 metabolism	0.313722	-1.15925	1	6	1	0.00636943	157	2584	318753	CG31473
	ko00750	Vitamin B6 metabolism	0.313722	-1.15925	1	6	1	0.00636943	157	2584	318753	CG31473
	dme_M00072	N-glycosylation by oligosaccharyltransferase	0.355516	-1.03419	1	7	1	0.00636943	157	2584	33082	CG1518
	M00072	N-glycosylation by oligosaccharyltransferase	0.355516	-1.03419	1	7	1	0.00636943	157	2584	33082	CG1518
	ko00591	Linoleic acid metabolism	0.355516	-1.03419	1	7	1	0.00636943	157	2584	31402	CG3009
	dme00591	Linoleic acid metabolism	0.355516	-1.03419	1	7	1	0.00636943	157	2584	31402	CG3009
	ko00562	Inositol phosphate metabolism	0.375644	-0.979114	1	36	3	0.0191083	157	2584	3137632611945370	norpA,5PtaseI,fwd
	dme00562	Inositol phosphate metabolism	0.375644	-0.979114	1	36	3	0.0191083	157	2584	3137632611945370	norpA,5PtaseI,fwd
	M00428	eIF4F complex	0.39478	-0.929426	1	8	1	0.00636943	157	2584	46020	NAT1
	dme_M00428	eIF4F complex	0.39478	-0.929426	1	8	1	0.00636943	157	2584	46020	NAT1
	dme04146	Peroxisome	0.397787	-0.921839	1	68	5	0.0318471	157	2584	4.41834e+24	ScpX,Idh,Acox57D-p,CG13827,Mfe2
	ko04146	Peroxisome	0.397787	-0.921839	1	68	5	0.0318471	157	2584	4.41834e+24	ScpX,Idh,Acox57D-p,CG13827,Mfe2
	ko00565	Ether lipid metabolism	0.412101	-0.886486	1	23	2	0.0127389	157	2584	3538431402	CG9248,CG3009
	dme00565	Ether lipid metabolism	0.412101	-0.886486	1	23	2	0.0127389	157	2584	3538431402	CG9248,CG3009
	ko03022	Basal transcription factors	0.425972	-0.853381	1	39	3	0.0191083	157	2584	408134275031773	Taf1,wda,Trf2
	dme03022	Basal transcription factors	0.425972	-0.853381	1	39	3	0.0191083	157	2584	408134275031773	Taf1,wda,Trf2
	ko01212	Fatty acid metabolism	0.458756	-0.779236	1	41	3	0.0191083	157	2584	383553461437445	CG2107,CG6746,Acox57D-p
	dme01212	Fatty acid metabolism	0.458756	-0.779236	1	41	3	0.0191083	157	2584	383553461437445	CG2107,CG6746,Acox57D-p
	ko04070	Phosphatidylinositol signaling system	0.458756	-0.779236	1	41	3	0.0191083	157	2584	3137632611945370	norpA,5PtaseI,fwd
	dme04070	Phosphatidylinositol signaling system	0.458756	-0.779236	1	41	3	0.0191083	157	2584	3137632611945370	norpA,5PtaseI,fwd
	M00131	Inositol phosphate metabolism, Ins(1,3,4,5)P4 => Ins(1,3,4)P3 => myo-inositol	0.466318	-0.762886	1	10	1	0.00636943	157	2584	326119	5PtaseI
	dme_M00131	Inositol phosphate metabolism, Ins(1,3,4,5)P4 => Ins(1,3,4)P3 => myo-inositol	0.466318	-0.762886	1	10	1	0.00636943	157	2584	326119	5PtaseI
	dme03460	Fanconi anemia pathway	0.475288	-0.743835	1	26	2	0.0127389	157	2584	4346231373	CG15817,mei-9
	ko03460	Fanconi anemia pathway	0.475288	-0.743835	1	26	2	0.0127389	157	2584	4346231373	CG15817,mei-9
	dme04745	Phototransduction - fly	0.495433	-0.702323	1	27	2	0.0127389	157	2584	3137635526	norpA,Act42A
	ko04745	Phototransduction - fly	0.495433	-0.702323	1	27	2	0.0127389	157	2584	3137635526	norpA,Act42A
	M00387	SCF-FBW7 complex	0.49887	-0.695409	1	11	1	0.00636943	157	2584	38516	ago
	dme00450	Selenocompound metabolism	0.49887	-0.695409	1	11	1	0.00636943	157	2584	40681	CG1427
	ko00450	Selenocompound metabolism	0.49887	-0.695409	1	11	1	0.00636943	157	2584	40681	CG1427
	dme_M00387	SCF-FBW7 complex	0.49887	-0.695409	1	11	1	0.00636943	157	2584	38516	ago
	ko04141	Protein processing in endoplasmic reticulum	0.503219	-0.68673	1	126	8	0.0509554	157	2584	3.62623e+39	S2P,CG1518,Edem1,CG9934,UbcD2,Plap,CG14476,Pngl
	dme04141	Protein processing in endoplasmic reticulum	0.503219	-0.68673	1	126	8	0.0509554	157	2584	3.62623e+39	S2P,CG1518,Edem1,CG9934,UbcD2,Plap,CG14476,Pngl
	ko00520	Amino sugar and nucleotide sugar metabolism	0.521776	-0.650517	1	45	3	0.0191083	157	2584	3180838223250730	Hexo2,Cht2,fdl
	dme00520	Amino sugar and nucleotide sugar metabolism	0.521776	-0.650517	1	45	3	0.0191083	157	2584	3180838223250730	Hexo2,Cht2,fdl
	ko00514	Other types of O-glycan biosynthesis	0.529448	-0.63592	1	12	1	0.00636943	157	2584	36564	O-fut1
	dme00514	Other types of O-glycan biosynthesis	0.529448	-0.63592	1	12	1	0.00636943	157	2584	36564	O-fut1
	M00087	beta-Oxidation	0.529448	-0.63592	1	12	1	0.00636943	157	2584	37445	Acox57D-p
	M00010	Citrate cycle, first carbon oxidation, oxaloacetate => 2-oxoglutarate	0.529448	-0.63592	1	12	1	0.00636943	157	2584	44291	Idh
	dme_M00087	beta-Oxidation	0.529448	-0.63592	1	12	1	0.00636943	157	2584	37445	Acox57D-p
	dme00534	Glycosaminoglycan biosynthesis - heparan sulfate / heparin	0.529448	-0.63592	1	12	1	0.00636943	157	2584	37198	botv
	dme00062	Fatty acid elongation	0.529448	-0.63592	1	12	1	0.00636943	157	2584	34614	CG6746
	ko00534	Glycosaminoglycan biosynthesis - heparan sulfate / heparin	0.529448	-0.63592	1	12	1	0.00636943	157	2584	37198	botv
	ko00062	Fatty acid elongation	0.529448	-0.63592	1	12	1	0.00636943	157	2584	34614	CG6746
	dme_M00010	Citrate cycle, first carbon oxidation, oxaloacetate => 2-oxoglutarate	0.529448	-0.63592	1	12	1	0.00636943	157	2584	44291	Idh
	dme00071	Fatty acid degradation	0.552854	-0.592661	1	30	2	0.0127389	157	2584	3835537445	CG2107,Acox57D-p
	ko00071	Fatty acid degradation	0.552854	-0.592661	1	30	2	0.0127389	157	2584	3835537445	CG2107,Acox57D-p
	dme_M00055	N-glycan precursor biosynthesis	0.558172	-0.583089	1	13	1	0.00636943	157	2584	326193	Alg10
	M00055	N-glycan precursor biosynthesis	0.558172	-0.583089	1	13	1	0.00636943	157	2584	326193	Alg10
	ko00740	Riboflavin metabolism	0.558172	-0.583089	1	13	1	0.00636943	157	2584	48445	Acph-1
	dme00740	Riboflavin metabolism	0.558172	-0.583089	1	13	1	0.00636943	157	2584	48445	Acph-1
	M00389	APC/C complex	0.610495	-0.493485	1	15	1	0.00636943	157	2584	38798	Cdc27
	dme_M00389	APC/C complex	0.610495	-0.493485	1	15	1	0.00636943	157	2584	38798	Cdc27
	dme01210	2-Oxocarboxylic acid metabolism	0.677656	-0.389115	1	18	1	0.00636943	157	2584	44291	Idh
	ko01210	2-Oxocarboxylic acid metabolism	0.677656	-0.389115	1	18	1	0.00636943	157	2584	44291	Idh
	M00352	Spliceosome, U2-snRNP	0.697379	-0.360427	1	19	1	0.00636943	157	2584	33235	CG2807
	dme00563	Glycosylphosphatidylinositol(GPI)-anchor biosynthesis	0.697379	-0.360427	1	19	1	0.00636943	157	2584	35685	CG2144
	ko00563	Glycosylphosphatidylinositol(GPI)-anchor biosynthesis	0.697379	-0.360427	1	19	1	0.00636943	157	2584	35685	CG2144
	dme_M00352	Spliceosome, U2-snRNP	0.697379	-0.360427	1	19	1	0.00636943	157	2584	33235	CG2807
	dme03410	Base excision repair	0.715902	-0.334213	1	20	1	0.00636943	157	2584	43796	Thd1
	ko03410	Base excision repair	0.715902	-0.334213	1	20	1	0.00636943	157	2584	43796	Thd1
	dme00480	Glutathione metabolism	0.748196	-0.29009	1	63	3	0.0191083	157	2584	442913692732164	Idh,GstS1,CG1492
	ko00480	Glutathione metabolism	0.748196	-0.29009	1	63	3	0.0191083	157	2584	442913692732164	Idh,GstS1,CG1492
	ko03013	RNA transport	0.753527	-0.282991	1	139	7	0.044586	157	2584	4.33314e+34	btz,CG8963,Acn,sbr,Fmr1,CG9769,NAT1
	dme03013	RNA transport	0.753527	-0.282991	1	139	7	0.044586	157	2584	4.33314e+34	btz,CG8963,Acn,sbr,Fmr1,CG9769,NAT1
	ko00790	Folate biosynthesis	0.779385	-0.24925	1	24	1	0.00636943	157	2584	40372	CG5656
	dme00790	Folate biosynthesis	0.779385	-0.24925	1	24	1	0.00636943	157	2584	40372	CG5656
	M00001	Glycolysis (Embden-Meyerhof pathway), glucose => pyruvate	0.779385	-0.24925	1	24	1	0.00636943	157	2584	39555	CG6650
	dme00630	Glyoxylate and dicarboxylate metabolism	0.779385	-0.24925	1	24	1	0.00636943	157	2584	40708	CG1236
	ko00630	Glyoxylate and dicarboxylate metabolism	0.779385	-0.24925	1	24	1	0.00636943	157	2584	40708	CG1236
	dme_M00001	Glycolysis (Embden-Meyerhof pathway), glucose => pyruvate	0.779385	-0.24925	1	24	1	0.00636943	157	2584	39555	CG6650
	dme03040	Spliceosome	0.784093	-0.243228	1	125	6	0.0382166	157	2584	4.07394e+31	Rm62,pUf68,CG2807,scaf6,Acn,CG42724
	ko03040	Spliceosome	0.784093	-0.243228	1	125	6	0.0382166	157	2584	4.07394e+31	Rm62,pUf68,CG2807,scaf6,Acn,CG42724
	dme00620	Pyruvate metabolism	0.818471	-0.200317	1	50	2	0.0127389	157	2584	4029940708	CG4365,CG1236
	ko00620	Pyruvate metabolism	0.818471	-0.200317	1	50	2	0.0127389	157	2584	4029940708	CG4365,CG1236
	ko00260	Glycine, serine and threonine metabolism	0.828753	-0.187833	1	28	1	0.00636943	157	2584	40708	CG1236
	dme00260	Glycine, serine and threonine metabolism	0.828753	-0.187833	1	28	1	0.00636943	157	2584	40708	CG1236
	dme00053	Ascorbate and aldarate metabolism	0.849148	-0.163522	1	30	1	0.00636943	157	2584	40079	CG3797
	ko00053	Ascorbate and aldarate metabolism	0.849148	-0.163522	1	30	1	0.00636943	157	2584	40079	CG3797
	ko00830	Retinol metabolism	0.858421	-0.15266	1	31	1	0.00636943	157	2584	40079	CG3797
	dme00830	Retinol metabolism	0.858421	-0.15266	1	31	1	0.00636943	157	2584	40079	CG3797
	dme00564	Glycerophospholipid metabolism	0.877575	-0.130593	1	58	2	0.0127389	157	2584	3538431402	CG9248,CG3009
	ko00564	Glycerophospholipid metabolism	0.877575	-0.130593	1	58	2	0.0127389	157	2584	3538431402	CG9248,CG3009
	dme_M00014	Glucuronate pathway (uronate pathway)	0.890182	-0.11633	1	35	1	0.00636943	157	2584	40079	CG3797
	M00009	Citrate cycle (TCA cycle, Krebs cycle)	0.890182	-0.11633	1	35	1	0.00636943	157	2584	44291	Idh
	dme_M00009	Citrate cycle (TCA cycle, Krebs cycle)	0.890182	-0.11633	1	35	1	0.00636943	157	2584	44291	Idh
	M00014	Glucuronate pathway (uronate pathway)	0.890182	-0.11633	1	35	1	0.00636943	157	2584	40079	CG3797
	ko00982	Drug metabolism - cytochrome P450	0.899987	-0.105375	1	62	2	0.0127389	157	2584	3692740079	GstS1,CG3797
	dme00980	Metabolism of xenobiotics by cytochrome P450	0.899987	-0.105375	1	62	2	0.0127389	157	2584	3692740079	GstS1,CG3797
	ko00980	Metabolism of xenobiotics by cytochrome P450	0.899987	-0.105375	1	62	2	0.0127389	157	2584	3692740079	GstS1,CG3797
	dme00982	Drug metabolism - cytochrome P450	0.899987	-0.105375	1	62	2	0.0127389	157	2584	3692740079	GstS1,CG3797
	ko03420	Nucleotide excision repair	0.914852	-0.0889928	1	39	1	0.00636943	157	2584	31373	mei-9
	dme03420	Nucleotide excision repair	0.914852	-0.0889928	1	39	1	0.00636943	157	2584	31373	mei-9
	M00177	Ribosome, eukaryotes	0.916307	-0.087404	1	89	3	0.0191083	157	2584	311063509844251	sta,RpS26,RpL8
	dme_M00177	Ribosome, eukaryotes	0.916307	-0.087404	1	89	3	0.0191083	157	2584	311063509844251	sta,RpS26,RpL8
	dme00970	Aminoacyl-tRNA biosynthesis	0.929664	-0.0729323	1	42	1	0.00636943	157	2584	40681	CG1427
	ko00970	Aminoacyl-tRNA biosynthesis	0.929664	-0.0729323	1	42	1	0.00636943	157	2584	40681	CG1427
	dme00860	Porphyrin and chlorophyll metabolism	0.934008	-0.0682704	1	43	1	0.00636943	157	2584	40079	CG3797
	ko00860	Porphyrin and chlorophyll metabolism	0.934008	-0.0682704	1	43	1	0.00636943	157	2584	40079	CG3797
	ko00020	Citrate cycle (TCA cycle)	0.934008	-0.0682704	1	43	1	0.00636943	157	2584	44291	Idh
	dme00020	Citrate cycle (TCA cycle)	0.934008	-0.0682704	1	43	1	0.00636943	157	2584	44291	Idh
	dme00561	Glycerolipid metabolism	0.938085	-0.0639144	1	44	1	0.00636943	157	2584	38028	mri
	ko00561	Glycerolipid metabolism	0.938085	-0.0639144	1	44	1	0.00636943	157	2584	38028	mri
	ko00040	Pentose and glucuronate interconversions	0.941912	-0.0598431	1	45	1	0.00636943	157	2584	40079	CG3797
	dme00040	Pentose and glucuronate interconversions	0.941912	-0.0598431	1	45	1	0.00636943	157	2584	40079	CG3797
	ko04145	Phagosome	0.946418	-0.0550706	1	74	2	0.0127389	157	2584	4488535526	mys,Act42A
	dme04145	Phagosome	0.946418	-0.0550706	1	74	2	0.0127389	157	2584	4488535526	mys,Act42A
	ko00983	Drug metabolism - other enzymes	0.948875	-0.0524779	1	47	1	0.00636943	157	2584	40079	CG3797
	dme00983	Drug metabolism - other enzymes	0.948875	-0.0524779	1	47	1	0.00636943	157	2584	40079	CG3797
	ko00010	Glycolysis / Gluconeogenesis	0.96041	-0.0403953	1	51	1	0.00636943	157	2584	39555	CG6650
	dme00010	Glycolysis / Gluconeogenesis	0.96041	-0.0403953	1	51	1	0.00636943	157	2584	39555	CG6650
	ko00500	Starch and sucrose metabolism	0.977763	-0.0224882	1	60	1	0.00636943	157	2584	40079	CG3797
	dme00500	Starch and sucrose metabolism	0.977763	-0.0224882	1	60	1	0.00636943	157	2584	40079	CG3797
	dme01230	Biosynthesis of amino acids	0.982803	-0.0173464	1	64	1	0.00636943	157	2584	44291	Idh
	ko01230	Biosynthesis of amino acids	0.982803	-0.0173464	1	64	1	0.00636943	157	2584	44291	Idh
	ko03010	Ribosome	0.989231	-0.0108274	1	131	3	0.0191083	157	2584	311063509844251	sta,RpS26,RpL8
	dme03010	Ribosome	0.989231	-0.0108274	1	131	3	0.0191083	157	2584	311063509844251	sta,RpS26,RpL8
	ko01200	Carbon metabolism	0.990254	-0.00979406	1	105	2	0.0127389	157	2584	3955544291	CG6650,Idh
	dme01200	Carbon metabolism	0.990254	-0.00979406	1	105	2	0.0127389	157	2584	3955544291	CG6650,Idh
	dme03008	Ribosome biogenesis in eukaryotes	0.995849	-0.00415988	1	86	1	0.00636943	157	2584	43944	sbr
	ko03008	Ribosome biogenesis in eukaryotes	0.995849	-0.00415988	1	86	1	0.00636943	157	2584	43944	sbr
	dme00230	Purine metabolism	0.999782	-0.000217742	1	131	1	0.00636943	157	2584	32406	rut
	ko00230	Purine metabolism	0.999782	-0.000217742	1	131	1	0.00636943	157	2584	32406	rut
	ko00232	Caffeine metabolism	1	-2.90322e-12	1	2	0	0	157	2584
	ko00290	Valine, leucine and isoleucine biosynthesis	1	-2.90322e-12	1	2	0	0	157	2584
	M00293	DNA polymerase zeta complex	1	-2.90322e-12	1	2	0	0	157	2584
	dme00290	Valine, leucine and isoleucine biosynthesis	1	-2.90322e-12	1	2	0	0	157	2584
	dme00232	Caffeine metabolism	1	-2.90322e-12	1	2	0	0	157	2584
	dme_M00294	DNA polymerase gamma complex	1	-2.90322e-12	1	2	0	0	157	2584
	M00338	Cysteine biosynthesis, homocysteine + serine => cysteine	1	-2.90322e-12	1	2	0	0	157	2584
	dme_M00338	Cysteine biosynthesis, homocysteine + serine => cysteine	1	-2.90322e-12	1	2	0	0	157	2584
	M00100	Sphingosine degradation	1	-2.90322e-12	1	2	0	0	157	2584
	M00554	Nucleotide sugar biosynthesis, galactose => UDP-galactose	1	-2.90322e-12	1	2	0	0	157	2584
	dme_M00100	Sphingosine degradation	1	-2.90322e-12	1	2	0	0	157	2584
	dme_M00293	DNA polymerase zeta complex	1	-2.90322e-12	1	2	0	0	157	2584
	dme_M00554	Nucleotide sugar biosynthesis, galactose => UDP-galactose	1	-2.90322e-12	1	2	0	0	157	2584
	M00294	DNA polymerase gamma complex	1	-2.90322e-12	1	2	0	0	157	2584
	M00400	p97-Ufd1-Npl4 complex	1	-1.72658e-12	1	3	0	0	157	2584
	dme00780	Biotin metabolism	1	-1.72658e-12	1	3	0	0	157	2584
	ko00785	Lipoic acid metabolism	1	-1.72658e-12	1	3	0	0	157	2584
	dme_M00288	RPA complex	1	-1.72658e-12	1	3	0	0	157	2584
	dme_M00058	Glycosaminoglycan biosynthesis, chondroitin sulfate backbone	1	-1.72658e-12	1	3	0	0	157	2584
	M00288	RPA complex	1	-1.72658e-12	1	3	0	0	157	2584
	dme_M00151	Cytochrome bc1 complex respiratory unit	1	-1.72658e-12	1	3	0	0	157	2584
	M00141	C1-unit interconversion, eukaryotes	1	-1.72658e-12	1	3	0	0	157	2584
	dme_M00015	Proline biosynthesis, glutamate => proline	1	-1.72658e-12	1	3	0	0	157	2584
	M00399	Cap binding complex	1	-1.72658e-12	1	3	0	0	157	2584
	M00291	MRN complex	1	-1.72658e-12	1	3	0	0	157	2584
	dme_M00400	p97-Ufd1-Npl4 complex	1	-1.72658e-12	1	3	0	0	157	2584
	dme00785	Lipoic acid metabolism	1	-1.72658e-12	1	3	0	0	157	2584
	M00046	Pyrimidine degradation, uracil => beta-alanine, thymine => 3-aminoisobutanoate	1	-1.72658e-12	1	3	0	0	157	2584
	dme00730	Thiamine metabolism	1	-1.72658e-12	1	3	0	0	157	2584
	dme_M00134	Polyamine biosynthesis, arginine => ornithine => putrescine	1	-1.72658e-12	1	3	0	0	157	2584
	dme_M00399	Cap binding complex	1	-1.72658e-12	1	3	0	0	157	2584
	M00151	Cytochrome bc1 complex respiratory unit	1	-1.72658e-12	1	3	0	0	157	2584
	M00058	Glycosaminoglycan biosynthesis, chondroitin sulfate backbone	1	-1.72658e-12	1	3	0	0	157	2584
	dme_M00086	beta-Oxidation, acyl-CoA synthesis	1	-1.72658e-12	1	3	0	0	157	2584
	ko00730	Thiamine metabolism	1	-1.72658e-12	1	3	0	0	157	2584
	dme_M00046	Pyrimidine degradation, uracil => beta-alanine, thymine => 3-aminoisobutanoate	1	-1.72658e-12	1	3	0	0	157	2584
	M00392	Ski complex	1	-1.72658e-12	1	3	0	0	157	2584
	M00410	ESCRT-II complex	1	-1.72658e-12	1	3	0	0	157	2584
	ko01220	Degradation of aromatic compounds	1	-1.72658e-12	1	3	0	0	157	2584
	ko00780	Biotin metabolism	1	-1.72658e-12	1	3	0	0	157	2584
	dme01220	Degradation of aromatic compounds	1	-1.72658e-12	1	3	0	0	157	2584
	M00051	Uridine monophosphate biosynthesis, glutamine (+ PRPP) => UMP	1	-1.72658e-12	1	3	0	0	157	2584
	M00134	Polyamine biosynthesis, arginine => ornithine => putrescine	1	-1.72658e-12	1	3	0	0	157	2584
	dme_M00020	Serine biosynthesis, glycerate-3P => serine	1	-1.72658e-12	1	3	0	0	157	2584
	dme_M00141	C1-unit interconversion, eukaryotes	1	-1.72658e-12	1	3	0	0	157	2584
	dme_M00410	ESCRT-II complex	1	-1.72658e-12	1	3	0	0	157	2584
	dme00471	D-Glutamine and D-glutamate metabolism	1	-1.72658e-12	1	3	0	0	157	2584
	M00020	Serine biosynthesis, glycerate-3P => serine	1	-1.72658e-12	1	3	0	0	157	2584
	M00015	Proline biosynthesis, glutamate => proline	1	-1.72658e-12	1	3	0	0	157	2584
	M00086	beta-Oxidation, acyl-CoA synthesis	1	-1.72658e-12	1	3	0	0	157	2584
	dme_M00291	MRN complex	1	-1.72658e-12	1	3	0	0	157	2584
	dme_M00392	Ski complex	1	-1.72658e-12	1	3	0	0	157	2584
	dme_M00051	Uridine monophosphate biosynthesis, glutamine (+ PRPP) => UMP	1	-1.72658e-12	1	3	0	0	157	2584
	ko00471	D-Glutamine and D-glutamate metabolism	1	-1.72658e-12	1	3	0	0	157	2584
	ko03450	Non-homologous end-joining	1	2.06366e-13	1	6	0	0	157	2584
	dme_M00285	MCM complex	1	2.06366e-13	1	6	0	0	157	2584
	M00383	ECV complex	1	2.06366e-13	1	6	0	0	157	2584
	dme_M00092	Phosphatidylethanolamine (PE) biosynthesis, ethanolamine => PE	1	2.06366e-13	1	6	0	0	157	2584
	M00284	Origin recognition complex	1	2.06366e-13	1	6	0	0	157	2584
	M00092	Phosphatidylethanolamine (PE) biosynthesis, ethanolamine => PE	1	2.06366e-13	1	6	0	0	157	2584
	M00052	Pyrimidine ribonucleotide biosynthesis, UMP => UDP/UTP,CDP/CTP	1	2.06366e-13	1	6	0	0	157	2584
	dme03450	Non-homologous end-joining	1	2.06366e-13	1	6	0	0	157	2584
	M00404	COPII complex	1	2.06366e-13	1	6	0	0	157	2584
	ko00061	Fatty acid biosynthesis	1	2.06366e-13	1	6	0	0	157	2584
	dme_M00284	Origin recognition complex	1	2.06366e-13	1	6	0	0	157	2584
	dme00061	Fatty acid biosynthesis	1	2.06366e-13	1	6	0	0	157	2584
	dme_M00404	COPII complex	1	2.06366e-13	1	6	0	0	157	2584
	M00285	MCM complex	1	2.06366e-13	1	6	0	0	157	2584
	dme_M00052	Pyrimidine ribonucleotide biosynthesis, UMP => UDP/UTP,CDP/CTP	1	2.06366e-13	1	6	0	0	157	2584
	dme_M00383	ECV complex	1	2.06366e-13	1	6	0	0	157	2584
	dme_M00180	RNA polymerase II, eukaryotes	1	9.12929e-13	1	12	0	0	157	2584
	dme00670	One carbon pool by folate	1	9.12929e-13	1	12	0	0	157	2584
	M00180	RNA polymerase II, eukaryotes	1	9.12929e-13	1	12	0	0	157	2584
	dme_M00182	RNA polymerase I, eukaryotes	1	9.12929e-13	1	12	0	0	157	2584
	ko00670	One carbon pool by folate	1	9.12929e-13	1	12	0	0	157	2584
	M00182	RNA polymerase I, eukaryotes	1	9.12929e-13	1	12	0	0	157	2584
	M00384	Cul3-SPOP complex	1	1.04499e-12	1	4	0	0	157	2584
	dme00400	Phenylalanine, tyrosine and tryptophan biosynthesis	1	1.04499e-12	1	4	0	0	157	2584
	M00083	Fatty acid biosynthesis, elongation	1	1.04499e-12	1	4	0	0	157	2584
	dme_M00263	DNA polymerase epsilon complex	1	1.04499e-12	1	4	0	0	157	2584
	M00426	Survival motor neuron (SMN) complex	1	1.04499e-12	1	4	0	0	157	2584
	dme_M00390	Exosome, archaea	1	1.04499e-12	1	4	0	0	157	2584
	M00263	DNA polymerase epsilon complex	1	1.04499e-12	1	4	0	0	157	2584
	M00027	GABA (gamma-Aminobutyrate) shunt	1	1.04499e-12	1	4	0	0	157	2584
	dme00601	Glycosphingolipid biosynthesis - lacto and neolacto series	1	1.04499e-12	1	4	0	0	157	2584
	M00402	Translocon-associated protein (TRAP) complex	1	1.04499e-12	1	4	0	0	157	2584
	dme_M00286	GINS complex	1	1.04499e-12	1	4	0	0	157	2584
	dme_M00425	H/ACA ribonucleoprotein complex	1	1.04499e-12	1	4	0	0	157	2584
	dme_M00083	Fatty acid biosynthesis, elongation	1	1.04499e-12	1	4	0	0	157	2584
	ko00533	Glycosaminoglycan biosynthesis - keratan sulfate	1	1.04499e-12	1	4	0	0	157	2584
	M00401	Sec61 complex	1	1.04499e-12	1	4	0	0	157	2584
	dme_M00261	DNA polymerase alpha / primase complex	1	1.04499e-12	1	4	0	0	157	2584
	dme_M00057	Glycosaminoglycan biosynthesis, linkage tetrasaccharide	1	1.04499e-12	1	4	0	0	157	2584
	ko00400	Phenylalanine, tyrosine and tryptophan biosynthesis	1	1.04499e-12	1	4	0	0	157	2584
	M00057	Glycosaminoglycan biosynthesis, linkage tetrasaccharide	1	1.04499e-12	1	4	0	0	157	2584
	dme_M00401	Sec61 complex	1	1.04499e-12	1	4	0	0	157	2584
	dme00533	Glycosaminoglycan biosynthesis - keratan sulfate	1	1.04499e-12	1	4	0	0	157	2584
	dme_M00118	Glutathione biosynthesis, glutamate => glutathione	1	1.04499e-12	1	4	0	0	157	2584
	M00286	GINS complex	1	1.04499e-12	1	4	0	0	157	2584
	M00425	H/ACA ribonucleoprotein complex	1	1.04499e-12	1	4	0	0	157	2584
	dme_M00384	Cul3-SPOP complex	1	1.04499e-12	1	4	0	0	157	2584
	ko00601	Glycosphingolipid biosynthesis - lacto and neolacto series	1	1.04499e-12	1	4	0	0	157	2584
	M00118	Glutathione biosynthesis, glutamate => glutathione	1	1.04499e-12	1	4	0	0	157	2584
	M00261	DNA polymerase alpha / primase complex	1	1.04499e-12	1	4	0	0	157	2584
	dme_M00402	Translocon-associated protein (TRAP) complex	1	1.04499e-12	1	4	0	0	157	2584
	dme_M00426	Survival motor neuron (SMN) complex	1	1.04499e-12	1	4	0	0	157	2584
	dme_M00027	GABA (gamma-Aminobutyrate) shunt	1	1.04499e-12	1	4	0	0	157	2584
	M00390	Exosome, archaea	1	1.04499e-12	1	4	0	0	157	2584
	dme_M00007	Pentose phosphate pathway, non-oxidative phase, fructose 6P => ribose 5P	1	1.79386e-12	1	5	0	0	157	2584
	M00082	Fatty acid biosynthesis, initiation	1	1.79386e-12	1	5	0	0	157	2584
	M00307	Pyruvate oxidation, pyruvate => acetyl-CoA	1	1.79386e-12	1	5	0	0	157	2584
	dme_M00082	Fatty acid biosynthesis, initiation	1	1.79386e-12	1	5	0	0	157	2584
	M00094	Ceramide biosynthesis	1	1.79386e-12	1	5	0	0	157	2584
	M00405	THC complex	1	1.79386e-12	1	5	0	0	157	2584
	dme_M00128	Ubiquinone biosynthesis, eukaryotes, 4-hydroxybenzoate => ubiquinone	1	1.79386e-12	1	5	0	0	157	2584
	M00006	Pentose phosphate pathway, oxidative phase, glucose 6P => ribulose 5P	1	1.79386e-12	1	5	0	0	157	2584
	dme_M00120	Coenzyme A biosynthesis, pantothenate => CoA	1	1.79386e-12	1	5	0	0	157	2584
	dme_M00307	Pyruvate oxidation, pyruvate => acetyl-CoA	1	1.79386e-12	1	5	0	0	157	2584
	dme_M00006	Pentose phosphate pathway, oxidative phase, glucose 6P => ribulose 5P	1	1.79386e-12	1	5	0	0	157	2584
	M00007	Pentose phosphate pathway, non-oxidative phase, fructose 6P => ribose 5P	1	1.79386e-12	1	5	0	0	157	2584
	dme_M00405	THC complex	1	1.79386e-12	1	5	0	0	157	2584
	M00289	RF-C complex	1	1.79386e-12	1	5	0	0	157	2584
	M00085	Fatty acid biosynthesis, elongation, mitochondria	1	1.79386e-12	1	5	0	0	157	2584
	M00128	Ubiquinone biosynthesis, eukaryotes, 4-hydroxybenzoate => ubiquinone	1	1.79386e-12	1	5	0	0	157	2584
	M00013	Malonate semialdehyde pathway, propanoyl-CoA => Acetyl-CoA	1	1.79386e-12	1	5	0	0	157	2584
	dme_M00013	Malonate semialdehyde pathway, propanoyl-CoA => Acetyl-CoA	1	1.79386e-12	1	5	0	0	157	2584
	dme_M00094	Ceramide biosynthesis	1	1.79386e-12	1	5	0	0	157	2584
	dme_M00085	Fatty acid biosynthesis, elongation, mitochondria	1	1.79386e-12	1	5	0	0	157	2584
	M00120	Coenzyme A biosynthesis, pantothenate => CoA	1	1.79386e-12	1	5	0	0	157	2584
	dme_M00289	RF-C complex	1	1.79386e-12	1	5	0	0	157	2584
	M00398	Sm core complex	1	2.74195e-12	1	7	0	0	157	2584
	ko00532	Glycosaminoglycan biosynthesis - chondroitin sulfate / dermatan sulfate	1	2.74195e-12	1	7	0	0	157	2584
	M00397	Lsm 1-7 complex	1	2.74195e-12	1	7	0	0	157	2584
	dme00072	Synthesis and degradation of ketone bodies	1	2.74195e-12	1	7	0	0	157	2584
	M00099	Sphingosine biosynthesis	1	2.74195e-12	1	7	0	0	157	2584
	dme_M00099	Sphingosine biosynthesis	1	2.74195e-12	1	7	0	0	157	2584
	dme_M00148	Succinate dehydrogenase (ubiquinone)	1	2.74195e-12	1	7	0	0	157	2584
	M00048	Inosine monophosphate biosynthesis, PRPP + glutamine => IMP	1	2.74195e-12	1	7	0	0	157	2584
	dme_M00048	Inosine monophosphate biosynthesis, PRPP + glutamine => IMP	1	2.74195e-12	1	7	0	0	157	2584
	M00148	Succinate dehydrogenase (ubiquinone)	1	2.74195e-12	1	7	0	0	157	2584
	M00396	Lsm 2-8 complex	1	2.74195e-12	1	7	0	0	157	2584
	dme_M00398	Sm core complex	1	2.74195e-12	1	7	0	0	157	2584
	dme_M00396	Lsm 2-8 complex	1	2.74195e-12	1	7	0	0	157	2584
	dme00532	Glycosaminoglycan biosynthesis - chondroitin sulfate / dermatan sulfate	1	2.74195e-12	1	7	0	0	157	2584
	ko00072	Synthesis and degradation of ketone bodies	1	2.74195e-12	1	7	0	0	157	2584
	dme_M00397	Lsm 1-7 complex	1	2.74195e-12	1	7	0	0	157	2584
	dme_M00380	SCF-BTRC complex	1	3.09039e-12	1	11	0	0	157	2584
	M00004	Pentose phosphate pathway (Pentose phosphate cycle)	1	3.09039e-12	1	11	0	0	157	2584
	M00380	SCF-BTRC complex	1	3.09039e-12	1	11	0	0	157	2584
	M00036	Leucine degradation, leucine => acetoacetate + acetyl-CoA	1	3.09039e-12	1	11	0	0	157	2584
	dme_M00381	SCF-SKP2 complex	1	3.09039e-12	1	11	0	0	157	2584
	M00381	SCF-SKP2 complex	1	3.09039e-12	1	11	0	0	157	2584
	dme_M00036	Leucine degradation, leucine => acetoacetate + acetyl-CoA	1	3.09039e-12	1	11	0	0	157	2584
	dme_M00004	Pentose phosphate pathway (Pentose phosphate cycle)	1	3.09039e-12	1	11	0	0	157	2584
	dme00360	Phenylalanine metabolism	1	3.16363e-12	1	10	0	0	157	2584
	ko00360	Phenylalanine metabolism	1	3.16363e-12	1	10	0	0	157	2584
	dme00770	Pantothenate and CoA biosynthesis	1	3.16363e-12	1	10	0	0	157	2584
	ko00920	Sulfur metabolism	1	3.16363e-12	1	10	0	0	157	2584
	M00290	Holo-TFIIH complex	1	3.16363e-12	1	10	0	0	157	2584
	dme_M00290	Holo-TFIIH complex	1	3.16363e-12	1	10	0	0	157	2584
	ko00770	Pantothenate and CoA biosynthesis	1	3.16363e-12	1	10	0	0	157	2584
	dme00920	Sulfur metabolism	1	3.16363e-12	1	10	0	0	157	2584
	ko00472	D-Arginine and D-ornithine metabolism	1	3.27303e-12	1	1	0	0	157	2584
	ko00300	Lysine biosynthesis	1	3.27303e-12	1	1	0	0	157	2584
	dme00300	Lysine biosynthesis	1	3.27303e-12	1	1	0	0	157	2584
	M00005	PRPP biosynthesis, ribose 5P => PRPP	1	3.27303e-12	1	1	0	0	157	2584
	dme_M00005	PRPP biosynthesis, ribose 5P => PRPP	1	3.27303e-12	1	1	0	0	157	2584
	dme00472	D-Arginine and D-ornithine metabolism	1	3.27303e-12	1	1	0	0	157	2584
	ko00130	Ubiquinone and other terpenoid-quinone biosynthesis	1	3.78257e-12	1	9	0	0	157	2584
	dme_M00034	Methionine salvage pathway	1	3.78257e-12	1	9	0	0	157	2584
	dme00130	Ubiquinone and other terpenoid-quinone biosynthesis	1	3.78257e-12	1	9	0	0	157	2584
	M00351	Spliceosome, U1-snRNP	1	3.78257e-12	1	9	0	0	157	2584
	M00406	TREX complex	1	3.78257e-12	1	9	0	0	157	2584
	ko04122	Sulfur relay system	1	3.78257e-12	1	9	0	0	157	2584
	M00034	Methionine salvage pathway	1	3.78257e-12	1	9	0	0	157	2584
	M00391	Exosome, eukaryotes	1	3.78257e-12	1	9	0	0	157	2584
	dme02010	ABC transporters	1	3.78257e-12	1	9	0	0	157	2584
	dme_M00351	Spliceosome, U1-snRNP	1	3.78257e-12	1	9	0	0	157	2584
	ko02010	ABC transporters	1	3.78257e-12	1	9	0	0	157	2584
	dme_M00391	Exosome, eukaryotes	1	3.78257e-12	1	9	0	0	157	2584
	dme04122	Sulfur relay system	1	3.78257e-12	1	9	0	0	157	2584
	dme_M00406	TREX complex	1	3.78257e-12	1	9	0	0	157	2584
	dme_M00147	NADH dehydrogenase (ubiquinone) 1 beta subcomplex	1	3.87952e-12	1	13	0	0	157	2584
	dme_M00050	Guanine ribonucleotide biosynthesis IMP => GDP,GTP	1	3.87952e-12	1	13	0	0	157	2584
	M00147	NADH dehydrogenase (ubiquinone) 1 beta subcomplex	1	3.87952e-12	1	13	0	0	157	2584
	dme00760	Nicotinate and nicotinamide metabolism	1	3.87952e-12	1	13	0	0	157	2584
	ko00760	Nicotinate and nicotinamide metabolism	1	3.87952e-12	1	13	0	0	157	2584
	M00050	Guanine ribonucleotide biosynthesis IMP => GDP,GTP	1	3.87952e-12	1	13	0	0	157	2584
	M00095	C5 isoprenoid biosynthesis, mevalonate pathway	1	3.99041e-12	1	8	0	0	157	2584
	dme00340	Histidine metabolism	1	3.99041e-12	1	8	0	0	157	2584
	M00632	Galactose degradation, Leloir pathway, galactose => alpha-D-glucose-1P	1	3.99041e-12	1	8	0	0	157	2584
	M00549	Nucleotide sugar biosynthesis, glucose => UDP-glucose	1	3.99041e-12	1	8	0	0	157	2584
	M00412	ESCRT-III complex	1	3.99041e-12	1	8	0	0	157	2584
	dme_M00412	ESCRT-III complex	1	3.99041e-12	1	8	0	0	157	2584
	dme_M00361	Nucleotide sugar biosynthesis, eukaryotes	1	3.99041e-12	1	8	0	0	157	2584
	dme_M00632	Galactose degradation, Leloir pathway, galactose => alpha-D-glucose-1P	1	3.99041e-12	1	8	0	0	157	2584
	M00361	Nucleotide sugar biosynthesis, eukaryotes	1	3.99041e-12	1	8	0	0	157	2584
	dme_M00549	Nucleotide sugar biosynthesis, glucose => UDP-glucose	1	3.99041e-12	1	8	0	0	157	2584
	ko00340	Histidine metabolism	1	3.99041e-12	1	8	0	0	157	2584
	dme_M00095	C5 isoprenoid biosynthesis, mevalonate pathway	1	3.99041e-12	1	8	0	0	157	2584
	dme_M00295	BRCA1-associated genome surveillance complex (BASC)	1	5.3577e-12	1	16	0	0	157	2584
	M00295	BRCA1-associated genome surveillance complex (BASC)	1	5.3577e-12	1	16	0	0	157	2584
	M00181	RNA polymerase III, eukaryotes	1	5.3577e-12	1	16	0	0	157	2584
	M00158	F-type ATPase, eukaryotes	1	5.3577e-12	1	16	0	0	157	2584
	dme_M00158	F-type ATPase, eukaryotes	1	5.3577e-12	1	16	0	0	157	2584
	dme_M00181	RNA polymerase III, eukaryotes	1	5.3577e-12	1	16	0	0	157	2584
	dme_M00143	NADH dehydrogenase (ubiquinone) Fe-S protein/flavoprotein complex, mitochondria	1	6.15296e-12	1	14	0	0	157	2584
	M00143	NADH dehydrogenase (ubiquinone) Fe-S protein/flavoprotein complex, mitochondria	1	6.15296e-12	1	14	0	0	157	2584
	ko00981	Insect hormone biosynthesis	1	6.15296e-12	1	14	0	0	157	2584
	dme_M00003	Gluconeogenesis, oxaloacetate => fructose-6P	1	6.15296e-12	1	14	0	0	157	2584
	dme00981	Insect hormone biosynthesis	1	6.15296e-12	1	14	0	0	157	2584
	dme_M00146	NADH dehydrogenase (ubiquinone) 1 alpha subcomplex	1	6.15296e-12	1	14	0	0	157	2584
	M00089	Triacylglycerol biosynthesis	1	6.15296e-12	1	14	0	0	157	2584
	M00003	Gluconeogenesis, oxaloacetate => fructose-6P	1	6.15296e-12	1	14	0	0	157	2584
	dme_M00089	Triacylglycerol biosynthesis	1	6.15296e-12	1	14	0	0	157	2584
	M00146	NADH dehydrogenase (ubiquinone) 1 alpha subcomplex	1	6.15296e-12	1	14	0	0	157	2584
	M00049	Adenine ribonucleotide biosynthesis, IMP => ADP,ATP	1	6.97825e-12	1	15	0	0	157	2584
	dme00512	Mucin type O-Glycan biosynthesis	1	6.97825e-12	1	15	0	0	157	2584
	ko00512	Mucin type O-Glycan biosynthesis	1	6.97825e-12	1	15	0	0	157	2584
	dme_M00002	Glycolysis, core module involving three-carbon compounds	1	6.97825e-12	1	15	0	0	157	2584
	dme_M00049	Adenine ribonucleotide biosynthesis, IMP => ADP,ATP	1	6.97825e-12	1	15	0	0	157	2584
	M00002	Glycolysis, core module involving three-carbon compounds	1	6.97825e-12	1	15	0	0	157	2584
	dme_M00154	Cytochrome c oxidase	1	7.41133e-12	1	19	0	0	157	2584
	M00154	Cytochrome c oxidase	1	7.41133e-12	1	19	0	0	157	2584
	ko00380	Tryptophan metabolism	1	7.41133e-12	1	19	0	0	157	2584
	dme00380	Tryptophan metabolism	1	7.41133e-12	1	19	0	0	157	2584
	M00353	Spliceosome, Prp19/CDC5L complex	1	7.61478e-12	1	17	0	0	157	2584
	dme_M00353	Spliceosome, Prp19/CDC5L complex	1	7.61478e-12	1	17	0	0	157	2584
	dme00910	Nitrogen metabolism	1	7.61478e-12	1	17	0	0	157	2584
	ko00910	Nitrogen metabolism	1	7.61478e-12	1	17	0	0	157	2584
	ko00650	Butanoate metabolism	1	7.61478e-12	1	17	0	0	157	2584
	dme00650	Butanoate metabolism	1	7.61478e-12	1	17	0	0	157	2584
	ko00350	Tyrosine metabolism	1	8.31672e-12	1	18	0	0	157	2584
	dme00900	Terpenoid backbone biosynthesis	1	8.31672e-12	1	18	0	0	157	2584
	dme00350	Tyrosine metabolism	1	8.31672e-12	1	18	0	0	157	2584
	ko00900	Terpenoid backbone biosynthesis	1	8.31672e-12	1	18	0	0	157	2584
	dme00410	beta-Alanine metabolism	1	8.31672e-12	1	18	0	0	157	2584
	ko00410	beta-Alanine metabolism	1	8.31672e-12	1	18	0	0	157	2584
	dme03440	Homologous recombination	1	9.17175e-12	1	20	0	0	157	2584
	ko03430	Mismatch repair	1	9.17175e-12	1	20	0	0	157	2584
	ko04130	SNARE interactions in vesicular transport	1	9.17175e-12	1	20	0	0	157	2584
	dme03430	Mismatch repair	1	9.17175e-12	1	20	0	0	157	2584
	dme00640	Propanoate metabolism	1	9.17175e-12	1	20	0	0	157	2584
	ko03440	Homologous recombination	1	9.17175e-12	1	20	0	0	157	2584
	ko00640	Propanoate metabolism	1	9.17175e-12	1	20	0	0	157	2584
	dme04130	SNARE interactions in vesicular transport	1	9.17175e-12	1	20	0	0	157	2584
	M00011	Citrate cycle, second carbon oxidation, 2-oxoglutarate => oxaloacetate	1	9.18592e-12	1	23	0	0	157	2584
	dme_M00011	Citrate cycle, second carbon oxidation, 2-oxoglutarate => oxaloacetate	1	9.18592e-12	1	23	0	0	157	2584
	ko00030	Pentose phosphate pathway	1	9.18592e-12	1	23	0	0	157	2584
	dme00030	Pentose phosphate pathway	1	9.18592e-12	1	23	0	0	157	2584
	dme00270	Cysteine and methionine metabolism	1	1.27788e-11	1	26	0	0	157	2584
	ko00270	Cysteine and methionine metabolism	1	1.27788e-11	1	26	0	0	157	2584
	dme03020	RNA polymerase	1	1.28214e-11	1	28	0	0	157	2584
	ko00600	Sphingolipid metabolism	1	1.28214e-11	1	28	0	0	157	2584
	ko03020	RNA polymerase	1	1.28214e-11	1	28	0	0	157	2584
	dme00600	Sphingolipid metabolism	1	1.28214e-11	1	28	0	0	157	2584
	dme00051	Fructose and mannose metabolism	1	1.28214e-11	1	28	0	0	157	2584
	ko00051	Fructose and mannose metabolism	1	1.28214e-11	1	28	0	0	157	2584
	dme00250	Alanine, aspartate and glutamate metabolism	1	1.3009e-11	1	29	0	0	157	2584
	ko00250	Alanine, aspartate and glutamate metabolism	1	1.3009e-11	1	29	0	0	157	2584
	dme_M00340	Proteasome, 20S core particle	1	1.37264e-11	1	25	0	0	157	2584
	M00340	Proteasome, 20S core particle	1	1.37264e-11	1	25	0	0	157	2584
	dme03060	Protein export	1	1.3774e-11	1	22	0	0	157	2584
	dme_M00341	Proteasome, 19S regulatory particle (PA700)	1	1.3774e-11	1	22	0	0	157	2584
	ko03060	Protein export	1	1.3774e-11	1	22	0	0	157	2584
	M00341	Proteasome, 19S regulatory particle (PA700)	1	1.3774e-11	1	22	0	0	157	2584
	dme00280	Valine, leucine and isoleucine degradation	1	1.56334e-11	1	31	0	0	157	2584
	dme_M00160	V-type ATPase, eukaryotes	1	1.56334e-11	1	31	0	0	157	2584
	M00160	V-type ATPase, eukaryotes	1	1.56334e-11	1	31	0	0	157	2584
	ko00280	Valine, leucine and isoleucine degradation	1	1.56334e-11	1	31	0	0	157	2584
	M00354	Spliceosome, U4/U6.U5 tri-snRNP	1	1.56882e-11	1	30	0	0	157	2584
	dme_M00354	Spliceosome, U4/U6.U5 tri-snRNP	1	1.56882e-11	1	30	0	0	157	2584
	dme_M00427	Nuclear pore complex	1	1.6378e-11	1	33	0	0	157	2584
	M00427	Nuclear pore complex	1	1.6378e-11	1	33	0	0	157	2584
	M00355	Spliceosome, 35S U5-snRNP	1	1.71377e-11	1	40	0	0	157	2584
	dme_M00355	Spliceosome, 35S U5-snRNP	1	1.71377e-11	1	40	0	0	157	2584
	M00359	Aminoacyl-tRNA biosynthesis, eukaryotes	1	2.15617e-11	1	36	0	0	157	2584
	dme_M00359	Aminoacyl-tRNA biosynthesis, eukaryotes	1	2.15617e-11	1	36	0	0	157	2584
	ko00052	Galactose metabolism	1	2.21854e-11	1	35	0	0	157	2584
	dme00052	Galactose metabolism	1	2.21854e-11	1	35	0	0	157	2584
	ko03030	DNA replication	1	2.21854e-11	1	35	0	0	157	2584
	dme03030	DNA replication	1	2.21854e-11	1	35	0	0	157	2584
	ko04080	Neuroactive ligand-receptor interaction	1	2.29005e-11	1	44	0	0	157	2584
	dme04080	Neuroactive ligand-receptor interaction	1	2.29005e-11	1	44	0	0	157	2584
	dme03050	Proteasome	1	2.35794e-11	1	50	0	0	157	2584
	ko03050	Proteasome	1	2.35794e-11	1	50	0	0	157	2584
	dme00330	Arginine and proline metabolism	1	2.43518e-11	1	53	0	0	157	2584
	ko00330	Arginine and proline metabolism	1	2.43518e-11	1	53	0	0	157	2584
	dme00240	Pyrimidine metabolism	1	2.78171e-11	1	82	0	0	157	2584
	ko00240	Pyrimidine metabolism	1	2.78171e-11	1	82	0	0	157	2584
	dme00190	Oxidative phosphorylation	1	3.06796e-11	1	126	0	0	157	2584
	ko00190	Oxidative phosphorylation	1	3.06796e-11	1	126	0	0	157	2584

## Sheet: Cl5
Significant Kegg terms	TermID	Term	Enrichment	logP	FDR_BH	Genes in Term	Target Genes in Term	Fraction of Targets in Term	Total Target Genes	Total Genes	Entrez Gene IDs	Gene Symbols
Enrichment p<0.01	dme_M00341	Proteasome, 19S regulatory particle (PA700)	0.000447537	-7.71175	0.1092	22	6	0.048	125	2584	4.26414e+29	Rpn7,Rpn2,Rpn3,Rpn1,Rpn6,Rpt3
	M00341	Proteasome, 19S regulatory particle (PA700)	0.000447537	-7.71175	0.1092	22	6	0.048	125	2584	4.26414e+29	Rpn7,Rpn2,Rpn3,Rpn1,Rpn6,Rpt3
	dme03050	Proteasome	0.00231385	-6.06884	0.25413	50	8	0.064	125	2584	4.26414e+39	Rpn7,Rpn2,Rpn3,Rpn1,Rpn6,Prosbeta7,Prosalpha5,Rpt3
	ko03050	Proteasome	0.00231385	-6.06884	0.25413	50	8	0.064	125	2584	4.26414e+39	Rpn7,Rpn2,Rpn3,Rpn1,Rpn6,Prosbeta7,Prosalpha5,Rpt3
	dme01230	Biosynthesis of amino acids	0.00312456	-5.76846	0.25413	64	9	0.072	125	2584	3.20873e+45	Gs2,CG32026,Gapdh2,Irp-1A,Pgk,Tal,Pfk,Eno,Eip55E
	ko01230	Biosynthesis of amino acids	0.00312456	-5.76846	0.25413	64	9	0.072	125	2584	3.20873e+45	Gs2,CG32026,Gapdh2,Irp-1A,Pgk,Tal,Pfk,Eno,Eip55E
	M00359	Aminoacyl-tRNA biosynthesis, eukaryotes	0.00669214	-5.00682	0.40822	36	6	0.048	125	2584	3.83315e+30	Aats-pro,Aats-trp,Aats-glupro,Aats-ile,CG33123,Aats-gln
Enrichment p<0.01	dme_M00359	Aminoacyl-tRNA biosynthesis, eukaryotes	0.00669214	-5.00682	0.40822	36	6	0.048	125	2584	3.83315e+30	Aats-pro,Aats-trp,Aats-glupro,Aats-ile,CG33123,Aats-gln
	dme00071	Fatty acid degradation	0.0131477	-4.33151	0.4918	30	5	0.04	125	2584	4.13114e+24	Fdh,Arc42,CG4860,CG7461,CG4598
	ko00071	Fatty acid degradation	0.0131477	-4.33151	0.4918	30	5	0.04	125	2584	4.13114e+24	Fdh,Arc42,CG4860,CG7461,CG4598
	dme00970	Aminoacyl-tRNA biosynthesis	0.014221	-4.25304	0.4918	42	6	0.048	125	2584	3.83315e+30	Aats-pro,Aats-trp,Aats-glupro,Aats-ile,CG33123,Aats-gln
	ko00970	Aminoacyl-tRNA biosynthesis	0.014221	-4.25304	0.4918	42	6	0.048	125	2584	3.83315e+30	Aats-pro,Aats-trp,Aats-glupro,Aats-ile,CG33123,Aats-gln
	dme00860	Porphyrin and chlorophyll metabolism	0.015889	-4.14213	0.4918	43	6	0.048	125	2584	3.51054e+29	CG10178,Updo,CG1885,Aats-glupro,Alas,CG15661
	ko00860	Porphyrin and chlorophyll metabolism	0.015889	-4.14213	0.4918	43	6	0.048	125	2584	3.51054e+29	CG10178,Updo,CG1885,Aats-glupro,Alas,CG15661
	M00409	ESCRT-I complex	0.0210877	-3.85906	0.4918	5	2	0.016	125	2584	4740832791	Vps28,CG7192
	dme_M00409	ESCRT-I complex	0.0210877	-3.85906	0.4918	5	2	0.016	125	2584	4740832791	Vps28,CG7192
	ko04340	Hedgehog signaling pathway	0.0261309	-3.64464	0.4918	24	4	0.032	125	2584	3.56533e+19	cos,wg,Pka-C3,Wnt6
	M00001	Glycolysis (Embden-Meyerhof pathway), glucose => pyruvate	0.0261309	-3.64464	0.4918	24	4	0.032	125	2584	3.25453e+19	Gapdh2,Pgk,Pfk,Eno
	dme04340	Hedgehog signaling pathway	0.0261309	-3.64464	0.4918	24	4	0.032	125	2584	3.56533e+19	cos,wg,Pka-C3,Wnt6
	dme_M00001	Glycolysis (Embden-Meyerhof pathway), glucose => pyruvate	0.0261309	-3.64464	0.4918	24	4	0.032	125	2584	3.25453e+19	Gapdh2,Pgk,Pfk,Eno
	dme_M00003	Gluconeogenesis, oxaloacetate => fructose-6P	0.027194	-3.60476	0.4918	14	3	0.024	125	2584	325453346133351	Gapdh2,Pgk,Eno
	M00003	Gluconeogenesis, oxaloacetate => fructose-6P	0.027194	-3.60476	0.4918	14	3	0.024	125	2584	325453346133351	Gapdh2,Pgk,Eno
	ko00982	Drug metabolism - cytochrome P450	0.0280756	-3.57286	0.4918	62	7	0.056	125	2584	3.51054e+34	CG10178,Fdh,Mgstl,GstD3,GstD9,CG15661,GstD1
	dme00980	Metabolism of xenobiotics by cytochrome P450	0.0280756	-3.57286	0.4918	62	7	0.056	125	2584	3.51054e+34	CG10178,Fdh,Mgstl,GstD3,GstD9,CG15661,GstD1
	ko00980	Metabolism of xenobiotics by cytochrome P450	0.0280756	-3.57286	0.4918	62	7	0.056	125	2584	3.51054e+34	CG10178,Fdh,Mgstl,GstD3,GstD9,CG15661,GstD1
	dme00982	Drug metabolism - cytochrome P450	0.0280756	-3.57286	0.4918	62	7	0.056	125	2584	3.51054e+34	CG10178,Fdh,Mgstl,GstD3,GstD9,CG15661,GstD1
	ko01200	Carbon metabolism	0.0282182	-3.56779	0.4918	105	10	0.08	125	2584	4.13113e+50	Fdh,CG32026,Arc42,Gapdh2,Irp-1A,Pgk,Tal,Pfk,Eno,CG4860
	dme01200	Carbon metabolism	0.0282182	-3.56779	0.4918	105	10	0.08	125	2584	4.13113e+50	Fdh,CG32026,Arc42,Gapdh2,Irp-1A,Pgk,Tal,Pfk,Eno,CG4860
	dme_M00002	Glycolysis, core module involving three-carbon compounds	0.0328174	-3.4168	0.4923	15	3	0.024	125	2584	325453346133351	Gapdh2,Pgk,Eno
	M00002	Glycolysis, core module involving three-carbon compounds	0.0328174	-3.4168	0.4923	15	3	0.024	125	2584	325453346133351	Gapdh2,Pgk,Eno
	dme00270	Cysteine and methionine metabolism	0.0341371	-3.37737	0.4923	26	4	0.032	125	2584	3.71434e+19	Eip55E,CG9977,CG11134,CG12279
	ko00270	Cysteine and methionine metabolism	0.0341371	-3.37737	0.4923	26	4	0.032	125	2584	3.71434e+19	Eip55E,CG9977,CG11134,CG12279
	ko00010	Glycolysis / Gluconeogenesis	0.0342997	-3.37262	0.4923	51	6	0.048	125	2584	4.13114e+29	Fdh,Pgm,Gapdh2,Pgk,Pfk,Eno
	dme00010	Glycolysis / Gluconeogenesis	0.0342997	-3.37262	0.4923	51	6	0.048	125	2584	4.40104e+29	Pgm,Fdh,Gapdh2,Pgk,Pfk,Eno
	ko00532	Glycosaminoglycan biosynthesis - chondroitin sulfate / dermatan sulfate	0.0415528	-3.18079	0.56327	7	2	0.016	125	2584	3225942991	CG43313,beta4GalT7
	dme00532	Glycosaminoglycan biosynthesis - chondroitin sulfate / dermatan sulfate	0.0415528	-3.18079	0.56327	7	2	0.016	125	2584	3225942991	CG43313,beta4GalT7
	ko04391	Hippo signaling pathway - fly	0.0547116	-2.90568	0.70261	57	6	0.048	125	2584	3.90134e+29	dally,kibra,hth,wg,wgn,upd2
	dme04391	Hippo signaling pathway - fly	0.0547116	-2.90568	0.70261	57	6	0.048	125	2584	3.90134e+29	dally,kibra,hth,wg,wgn,upd2
	ko04122	Sulfur relay system	0.0668744	-2.70494	0.81587	9	2	0.016	125	2584	276894941570	CG33276,CG12279
	dme04122	Sulfur relay system	0.0668744	-2.70494	0.81587	9	2	0.016	125	2584	276894941570	CG33276,CG12279
	ko00983	Drug metabolism - other enzymes	0.0739372	-2.60454	0.85908	47	5	0.04	125	2584	3.51053e+24	CG10178,CG8360,CG15661,CG6364,l(2)k01209
	dme00983	Drug metabolism - other enzymes	0.0739372	-2.60454	0.85908	47	5	0.04	125	2584	3.51053e+24	CG10178,CG8360,CG15661,CG6364,l(2)k01209
	M00338	Cysteine biosynthesis, homocysteine + serine => cysteine	0.0944269	-2.35993	1	2	1	0.008	125	2584	37143	Eip55E
	dme_M00338	Cysteine biosynthesis, homocysteine + serine => cysteine	0.0944269	-2.35993	1	2	1	0.008	125	2584	37143	Eip55E
	ko00030	Pentose phosphate pathway	0.096714	-2.336	1	23	3	0.024	125	2584	440103780436060	Pgm,Tal,Pfk
	dme00030	Pentose phosphate pathway	0.096714	-2.336	1	23	3	0.024	125	2584	440103780436060	Pgm,Tal,Pfk
	M00010	Citrate cycle, first carbon oxidation, oxaloacetate => 2-oxoglutarate	0.111633	-2.19254	1	12	2	0.016	125	2584	31782942689	CG32026,Irp-1A
	dme_M00010	Citrate cycle, first carbon oxidation, oxaloacetate => 2-oxoglutarate	0.111633	-2.19254	1	12	2	0.016	125	2584	31782942689	CG32026,Irp-1A
	dme04310	Wnt signaling pathway	0.130365	-2.03742	1	88	7	0.056	125	2584	3.26243e+34	Pp2B-14D,Roc1a,dally,wg,Pka-C3,Wnt6,CkIIbeta2
	ko04310	Wnt signaling pathway	0.130365	-2.03742	1	88	7	0.056	125	2584	3.26243e+34	Pp2B-14D,Roc1a,dally,wg,Pka-C3,Wnt6,CkIIbeta2
	ko01212	Fatty acid metabolism	0.133755	-2.01174	1	41	4	0.032	125	2584	4.23644e+19	Arc42,CG4860,CG7461,Ppt1
	dme01212	Fatty acid metabolism	0.133755	-2.01174	1	41	4	0.032	125	2584	4.23644e+19	Arc42,CG4860,CG7461,Ppt1
	M00400	p97-Ufd1-Npl4 complex	0.138268	-1.97856	1	3	1	0.008	125	2584	36040	TER94
	dme_M00058	Glycosaminoglycan biosynthesis, chondroitin sulfate backbone	0.138268	-1.97856	1	3	1	0.008	125	2584	32259	CG43313
	dme_M00400	p97-Ufd1-Npl4 complex	0.138268	-1.97856	1	3	1	0.008	125	2584	36040	TER94
	M00058	Glycosaminoglycan biosynthesis, chondroitin sulfate backbone	0.138268	-1.97856	1	3	1	0.008	125	2584	32259	CG43313
	ko01220	Degradation of aromatic compounds	0.138268	-1.97856	1	3	1	0.008	125	2584	41311	Fdh
	dme01220	Degradation of aromatic compounds	0.138268	-1.97856	1	3	1	0.008	125	2584	41311	Fdh
	M00051	Uridine monophosphate biosynthesis, glutamine (+ PRPP) => UMP	0.138268	-1.97856	1	3	1	0.008	125	2584	41022	Dhod
	dme_M00051	Uridine monophosphate biosynthesis, glutamine (+ PRPP) => UMP	0.138268	-1.97856	1	3	1	0.008	125	2584	41022	Dhod
	ko00260	Glycine, serine and threonine metabolism	0.15081	-1.89174	1	28	3	0.024	125	2584	371433781540875	Eip55E,Alas,Gld
	dme00260	Glycine, serine and threonine metabolism	0.15081	-1.89174	1	28	3	0.024	125	2584	371433781540875	Eip55E,Alas,Gld
	ko00500	Starch and sucrose metabolism	0.161912	-1.8207	1	60	5	0.04	125	2584	3.51054e+24	CG10178,Pgm,CG15661,Treh,Mal-B2
	dme00500	Starch and sucrose metabolism	0.161912	-1.8207	1	60	5	0.04	125	2584	3.51054e+24	CG10178,Pgm,CG15661,Treh,Mal-B2
	M00384	Cul3-SPOP complex	0.180002	-1.71479	1	4	1	0.008	125	2584	31014	Roc1a
	dme_M00057	Glycosaminoglycan biosynthesis, linkage tetrasaccharide	0.180002	-1.71479	1	4	1	0.008	125	2584	42991	beta4GalT7
	M00057	Glycosaminoglycan biosynthesis, linkage tetrasaccharide	0.180002	-1.71479	1	4	1	0.008	125	2584	42991	beta4GalT7
	dme_M00384	Cul3-SPOP complex	0.180002	-1.71479	1	4	1	0.008	125	2584	31014	Roc1a
	dme00480	Glutathione metabolism	0.186536	-1.67913	1	63	5	0.04	125	2584	4.84504e+24	Dip-B,Mgstl,GstD3,GstD9,GstD1
	ko00480	Glutathione metabolism	0.186536	-1.67913	1	63	5	0.04	125	2584	4.84504e+24	Dip-B,Mgstl,GstD3,GstD9,GstD1
	dme00280	Valine, leucine and isoleucine degradation	0.18699	-1.6767	1	31	3	0.024	125	2584	423644148032789	Arc42,CG4860,scu
	ko00280	Valine, leucine and isoleucine degradation	0.18699	-1.6767	1	31	3	0.024	125	2584	423644148032789	Arc42,CG4860,scu
	ko00830	Retinol metabolism	0.18699	-1.6767	1	31	3	0.024	125	2584	351054131137421	CG10178,Fdh,CG15661
	dme00830	Retinol metabolism	0.18699	-1.6767	1	31	3	0.024	125	2584	351054131137421	CG10178,Fdh,CG15661
	dme00910	Nitrogen metabolism	0.197291	-1.62307	1	17	2	0.016	125	2584	3208739390	Gs2,CAH2
	ko00910	Nitrogen metabolism	0.197291	-1.62307	1	17	2	0.016	125	2584	3208739390	Gs2,CAH2
	ko00650	Butanoate metabolism	0.197291	-1.62307	1	17	2	0.016	125	2584	4236441480	Arc42,CG4860
	dme00650	Butanoate metabolism	0.197291	-1.62307	1	17	2	0.016	125	2584	4236441480	Arc42,CG4860
	dme01210	2-Oxocarboxylic acid metabolism	0.215329	-1.53559	1	18	2	0.016	125	2584	31782942689	CG32026,Irp-1A
	ko01210	2-Oxocarboxylic acid metabolism	0.215329	-1.53559	1	18	2	0.016	125	2584	31782942689	CG32026,Irp-1A
	dme_M00007	Pentose phosphate pathway, non-oxidative phase, fructose 6P => ribose 5P	0.219731	-1.51535	1	5	1	0.008	125	2584	37804	Tal
	M00007	Pentose phosphate pathway, non-oxidative phase, fructose 6P => ribose 5P	0.219731	-1.51535	1	5	1	0.008	125	2584	37804	Tal
	M00395	Decapping complex	0.219731	-1.51535	1	5	1	0.008	125	2584	42058	Patr-1
	dme_M00395	Decapping complex	0.219731	-1.51535	1	5	1	0.008	125	2584	42058	Patr-1
	dme_M00014	Glucuronate pathway (uronate pathway)	0.238207	-1.43461	1	35	3	0.024	125	2584	351053742132592	CG10178,CG15661,CG9914
	ko00052	Galactose metabolism	0.238207	-1.43461	1	35	3	0.024	125	2584	440103606034598	Pgm,Pfk,Mal-B2
	dme00052	Galactose metabolism	0.238207	-1.43461	1	35	3	0.024	125	2584	440103606034598	Pgm,Pfk,Mal-B2
	M00014	Glucuronate pathway (uronate pathway)	0.238207	-1.43461	1	35	3	0.024	125	2584	351053742132592	CG10178,CG15661,CG9914
	M00383	ECV complex	0.257549	-1.35655	1	6	1	0.008	125	2584	31014	Roc1a
	dme_M00092	Phosphatidylethanolamine (PE) biosynthesis, ethanolamine => PE	0.257549	-1.35655	1	6	1	0.008	125	2584	36496	bbc
	M00092	Phosphatidylethanolamine (PE) biosynthesis, ethanolamine => PE	0.257549	-1.35655	1	6	1	0.008	125	2584	36496	bbc
	dme_M00383	ECV complex	0.257549	-1.35655	1	6	1	0.008	125	2584	31014	Roc1a
	M00397	Lsm 1-7 complex	0.293548	-1.22571	1	7	1	0.008	125	2584	38693	CG6610
	M00048	Inosine monophosphate biosynthesis, PRPP + glutamine => IMP	0.293548	-1.22571	1	7	1	0.008	125	2584	32228	ade5
	dme_M00048	Inosine monophosphate biosynthesis, PRPP + glutamine => IMP	0.293548	-1.22571	1	7	1	0.008	125	2584	32228	ade5
	M00396	Lsm 2-8 complex	0.293548	-1.22571	1	7	1	0.008	125	2584	38693	CG6610
	dme_M00396	Lsm 2-8 complex	0.293548	-1.22571	1	7	1	0.008	125	2584	38693	CG6610
	dme_M00397	Lsm 1-7 complex	0.293548	-1.22571	1	7	1	0.008	125	2584	38693	CG6610
	ko00565	Ether lipid metabolism	0.30666	-1.18202	1	23	2	0.016	125	2584	3596636496	wun,bbc
	dme00565	Ether lipid metabolism	0.30666	-1.18202	1	23	2	0.016	125	2584	3596636496	wun,bbc
	dme00630	Glyoxylate and dicarboxylate metabolism	0.324829	-1.12446	1	24	2	0.016	125	2584	3208742689	Gs2,Irp-1A
	ko00630	Glyoxylate and dicarboxylate metabolism	0.324829	-1.12446	1	24	2	0.016	125	2584	3208742689	Gs2,Irp-1A
	M00549	Nucleotide sugar biosynthesis, glucose => UDP-glucose	0.327816	-1.1153	1	8	1	0.008	125	2584	44010	Pgm
	dme_M00549	Nucleotide sugar biosynthesis, glucose => UDP-glucose	0.327816	-1.1153	1	8	1	0.008	125	2584	44010	Pgm
	dme_M00340	Proteasome, 20S core particle	0.342877	-1.07038	1	25	2	0.016	125	2584	4063936951	Prosbeta7,Prosalpha5
	M00340	Proteasome, 20S core particle	0.342877	-1.07038	1	25	2	0.016	125	2584	4063936951	Prosbeta7,Prosalpha5
	dme_M00034	Methionine salvage pathway	0.360433	-1.02045	1	9	1	0.008	125	2584	32334	CG11134
	M00034	Methionine salvage pathway	0.360433	-1.02045	1	9	1	0.008	125	2584	32334	CG11134
	ko00520	Amino sugar and nucleotide sugar metabolism	0.372523	-0.987457	1	45	3	0.024	125	2584	3.76384e+16	Gmer,Pgm,Gfat1
	ko00040	Pentose and glucuronate interconversions	0.372523	-0.987457	1	45	3	0.024	125	2584	351053742132592	CG10178,CG15661,CG9914
	dme00520	Amino sugar and nucleotide sugar metabolism	0.372523	-0.987457	1	45	3	0.024	125	2584	3.76384e+16	Gmer,Pgm,Gfat1
	dme00040	Pentose and glucuronate interconversions	0.372523	-0.987457	1	45	3	0.024	125	2584	351053742132592	CG10178,CG15661,CG9914
	M00131	Inositol phosphate metabolism, Ins(1,3,4,5)P4 => Ins(1,3,4)P3 => myo-inositol	0.39148	-0.937821	1	10	1	0.008	125	2584	39739	CG17026
	ko00920	Sulfur metabolism	0.39148	-0.937821	1	10	1	0.008	125	2584	41570	CG12279
	dme_M00131	Inositol phosphate metabolism, Ins(1,3,4,5)P4 => Ins(1,3,4)P3 => myo-inositol	0.39148	-0.937821	1	10	1	0.008	125	2584	39739	CG17026
	dme00920	Sulfur metabolism	0.39148	-0.937821	1	10	1	0.008	125	2584	41570	CG12279
	ko00600	Sphingolipid metabolism	0.396006	-0.926327	1	28	2	0.016	125	2584	35966318721	wun,CG31414
	dme00600	Sphingolipid metabolism	0.396006	-0.926327	1	28	2	0.016	125	2584	35966318721	wun,CG31414
	dme00051	Fructose and mannose metabolism	0.396006	-0.926327	1	28	2	0.016	125	2584	3763836060	Gmer,Pfk
	ko00051	Fructose and mannose metabolism	0.396006	-0.926327	1	28	2	0.016	125	2584	3763836060	Gmer,Pfk
	dme00250	Alanine, aspartate and glutamate metabolism	0.413294	-0.883596	1	29	2	0.016	125	2584	320873354921	Gs2,Gfat1
	ko00250	Alanine, aspartate and glutamate metabolism	0.413294	-0.883596	1	29	2	0.016	125	2584	320873354921	Gs2,Gfat1
	ko04144	Endocytosis	0.413357	-0.883443	1	87	5	0.04	125	2584	4.90454e+24	Gprk2,Hsc70-4,Vps28,Past1,CG7192
	dme04144	Endocytosis	0.413357	-0.883443	1	87	5	0.04	125	2584	4.90454e+24	Gprk2,Hsc70-4,Vps28,Past1,CG7192
	dme04512	ECM-receptor interaction	0.421031	-0.865048	1	11	1	0.008	125	2584	33941	Tsp
	dme_M00380	SCF-BTRC complex	0.421031	-0.865048	1	11	1	0.008	125	2584	31014	Roc1a
	M00004	Pentose phosphate pathway (Pentose phosphate cycle)	0.421031	-0.865048	1	11	1	0.008	125	2584	37804	Tal
	M00387	SCF-FBW7 complex	0.421031	-0.865048	1	11	1	0.008	125	2584	31014	Roc1a
	dme00450	Selenocompound metabolism	0.421031	-0.865048	1	11	1	0.008	125	2584	37143	Eip55E
	M00380	SCF-BTRC complex	0.421031	-0.865048	1	11	1	0.008	125	2584	31014	Roc1a
	dme_M00381	SCF-SKP2 complex	0.421031	-0.865048	1	11	1	0.008	125	2584	31014	Roc1a
	M00381	SCF-SKP2 complex	0.421031	-0.865048	1	11	1	0.008	125	2584	31014	Roc1a
	ko00450	Selenocompound metabolism	0.421031	-0.865048	1	11	1	0.008	125	2584	37143	Eip55E
	dme_M00387	SCF-FBW7 complex	0.421031	-0.865048	1	11	1	0.008	125	2584	31014	Roc1a
	dme_M00004	Pentose phosphate pathway (Pentose phosphate cycle)	0.421031	-0.865048	1	11	1	0.008	125	2584	37804	Tal
	ko04512	ECM-receptor interaction	0.421031	-0.865048	1	11	1	0.008	125	2584	33941	Tsp
	dme00053	Ascorbate and aldarate metabolism	0.430338	-0.843184	1	30	2	0.016	125	2584	3510537421	CG10178,CG15661
	ko00053	Ascorbate and aldarate metabolism	0.430338	-0.843184	1	30	2	0.016	125	2584	3510537421	CG10178,CG15661
	M00354	Spliceosome, U4/U6.U5 tri-snRNP	0.430338	-0.843184	1	30	2	0.016	125	2584	3288138693	CG7288,CG6610
	dme_M00354	Spliceosome, U4/U6.U5 tri-snRNP	0.430338	-0.843184	1	30	2	0.016	125	2584	3288138693	CG7288,CG6610
	M00177	Ribosome, eukaryotes	0.432921	-0.837201	1	89	5	0.04	125	2584	3.15884e+24	RpL7A,RpS24,RpLP2,RpL32,RpS17
	dme_M00177	Ribosome, eukaryotes	0.432921	-0.837201	1	89	5	0.04	125	2584	3.15884e+24	RpL7A,RpS24,RpLP2,RpL32,RpS17
	dme04142	Lysosome	0.442657	-0.814961	1	90	5	0.04	125	2584	3.43585e+25	Npc1a,CG13397,Ppt1,Tsp42Ea,CG31414
	ko04142	Lysosome	0.442657	-0.814961	1	90	5	0.04	125	2584	3.43585e+25	Npc1a,CG13397,Ppt1,Tsp42Ea,CG31414
	M00087	beta-Oxidation	0.449159	-0.800379	1	12	1	0.008	125	2584	37217	CG7461
	dme_M00087	beta-Oxidation	0.449159	-0.800379	1	12	1	0.008	125	2584	37217	CG7461
	dme00534	Glycosaminoglycan biosynthesis - heparan sulfate / heparin	0.449159	-0.800379	1	12	1	0.008	125	2584	42991	beta4GalT7
	dme00062	Fatty acid elongation	0.449159	-0.800379	1	12	1	0.008	125	2584	31805	Ppt1
	ko00534	Glycosaminoglycan biosynthesis - heparan sulfate / heparin	0.449159	-0.800379	1	12	1	0.008	125	2584	42991	beta4GalT7
	ko00062	Fatty acid elongation	0.449159	-0.800379	1	12	1	0.008	125	2584	31805	Ppt1
	dme_M00147	NADH dehydrogenase (ubiquinone) 1 beta subcomplex	0.47593	-0.742485	1	13	1	0.008	125	2584	44228	Pdsw
	M00147	NADH dehydrogenase (ubiquinone) 1 beta subcomplex	0.47593	-0.742485	1	13	1	0.008	125	2584	44228	Pdsw
	dme00760	Nicotinate and nicotinamide metabolism	0.47593	-0.742485	1	13	1	0.008	125	2584	32328	CG9940
	ko00740	Riboflavin metabolism	0.47593	-0.742485	1	13	1	0.008	125	2584	40936	CG2846
	ko00760	Nicotinate and nicotinamide metabolism	0.47593	-0.742485	1	13	1	0.008	125	2584	32328	CG9940
	ko00590	Arachidonic acid metabolism	0.47593	-0.742485	1	13	1	0.008	125	2584	35146	CG10602
	dme00740	Riboflavin metabolism	0.47593	-0.742485	1	13	1	0.008	125	2584	40936	CG2846
	dme00590	Arachidonic acid metabolism	0.47593	-0.742485	1	13	1	0.008	125	2584	35146	CG10602
	ko03018	RNA degradation	0.47738	-0.739441	1	53	3	0.024	125	2584	386934205833351	CG6610,Patr-1,Eno
	dme03018	RNA degradation	0.47738	-0.739441	1	53	3	0.024	125	2584	386934205833351	CG6610,Patr-1,Eno
	M00089	Triacylglycerol biosynthesis	0.501409	-0.690332	1	14	1	0.008	125	2584	35966	wun
	dme_M00089	Triacylglycerol biosynthesis	0.501409	-0.690332	1	14	1	0.008	125	2584	35966	wun
	M00009	Citrate cycle (TCA cycle, Krebs cycle)	0.511373	-0.670656	1	35	2	0.016	125	2584	31782942689	CG32026,Irp-1A
	dme_M00009	Citrate cycle (TCA cycle, Krebs cycle)	0.511373	-0.670656	1	35	2	0.016	125	2584	31782942689	CG32026,Irp-1A
	dme00564	Glycerophospholipid metabolism	0.538771	-0.618465	1	58	3	0.024	125	2584	359663649643104	wun,bbc,CLS
	ko00564	Glycerophospholipid metabolism	0.538771	-0.618465	1	58	3	0.024	125	2584	359663649643104	wun,bbc,CLS
	M00158	F-type ATPase, eukaryotes	0.54874	-0.600131	1	16	1	0.008	125	2584	37931	CG4692
	dme00531	Glycosaminoglycan degradation	0.54874	-0.600131	1	16	1	0.008	125	2584	46386	CG13397
	dme_M00158	F-type ATPase, eukaryotes	0.54874	-0.600131	1	16	1	0.008	125	2584	37931	CG4692
	ko00531	Glycosaminoglycan degradation	0.54874	-0.600131	1	16	1	0.008	125	2584	46386	CG13397
	dme00240	Pyrimidine metabolism	0.567727	-0.566115	1	82	4	0.032	125	2584	3.41224e+19	CG8360,CG6364,l(2)k01209,Dhod
	ko00240	Pyrimidine metabolism	0.567727	-0.566115	1	82	4	0.032	125	2584	3.41224e+19	CG8360,CG6364,l(2)k01209,Dhod
	M00353	Spliceosome, Prp19/CDC5L complex	0.570706	-0.560882	1	17	1	0.008	125	2584	41840	Hsc70-4
	dme_M00353	Spliceosome, Prp19/CDC5L complex	0.570706	-0.560882	1	17	1	0.008	125	2584	41840	Hsc70-4
	ko00350	Tyrosine metabolism	0.59161	-0.524908	1	18	1	0.008	125	2584	41311	Fdh
	dme00900	Terpenoid backbone biosynthesis	0.59161	-0.524908	1	18	1	0.008	125	2584	33682	CG2976
	dme00350	Tyrosine metabolism	0.59161	-0.524908	1	18	1	0.008	125	2584	41311	Fdh
	ko00900	Terpenoid backbone biosynthesis	0.59161	-0.524908	1	18	1	0.008	125	2584	33682	CG2976
	dme_M00154	Cytochrome c oxidase	0.611504	-0.491833	1	19	1	0.008	125	2584	33919	CG11043
	dme00563	Glycosylphosphatidylinositol(GPI)-anchor biosynthesis	0.611504	-0.491833	1	19	1	0.008	125	2584	37118	CG12263
	M00154	Cytochrome c oxidase	0.611504	-0.491833	1	19	1	0.008	125	2584	33919	CG11043
	ko00563	Glycosylphosphatidylinositol(GPI)-anchor biosynthesis	0.611504	-0.491833	1	19	1	0.008	125	2584	37118	CG12263
	dme00230	Purine metabolism	0.617036	-0.482827	1	131	6	0.048	125	2584	3.41964e+30	PrBP,Pgm,DhpD,ade5,Ady43A,CG30016
	ko03010	Ribosome	0.617036	-0.482827	1	131	6	0.048	125	2584	3.36883e+29	mRpS2,RpL7A,RpS24,RpLP2,RpL32,RpS17
	ko00230	Purine metabolism	0.617036	-0.482827	1	131	6	0.048	125	2584	3.41964e+30	PrBP,Pgm,DhpD,ade5,Ady43A,CG30016
	dme03010	Ribosome	0.617036	-0.482827	1	131	6	0.048	125	2584	3.36883e+29	mRpS2,RpL7A,RpS24,RpLP2,RpL32,RpS17
	ko00020	Citrate cycle (TCA cycle)	0.624501	-0.470802	1	43	2	0.016	125	2584	31782942689	CG32026,Irp-1A
	dme00020	Citrate cycle (TCA cycle)	0.624501	-0.470802	1	43	2	0.016	125	2584	31782942689	CG32026,Irp-1A
	ko04630	Jak-STAT signaling pathway	0.630437	-0.461342	1	20	1	0.008	125	2584	35786	Socs44A
	ko04130	SNARE interactions in vesicular transport	0.630437	-0.461342	1	20	1	0.008	125	2584	42854	Syx1A
	dme04630	Jak-STAT signaling pathway	0.630437	-0.461342	1	20	1	0.008	125	2584	35786	Socs44A
	dme04130	SNARE interactions in vesicular transport	0.630437	-0.461342	1	20	1	0.008	125	2584	42854	Syx1A
	dme04330	Notch signaling pathway	0.665599	-0.407068	1	22	1	0.008	125	2584	43275	Ser
	ko04330	Notch signaling pathway	0.665599	-0.407068	1	22	1	0.008	125	2584	43275	Ser
	ko00511	Other glycan degradation	0.665599	-0.407068	1	22	1	0.008	125	2584	318721	CG31414
	dme00511	Other glycan degradation	0.665599	-0.407068	1	22	1	0.008	125	2584	318721	CG31414
	ko03013	RNA transport	0.675095	-0.392903	1	139	6	0.048	125	2584	3.77219e+31	snRNA:U2:14B,Thor,eIF2B-alpha,eIF2B-delta,eIF5B,CG17737
	dme03013	RNA transport	0.675095	-0.392903	1	139	6	0.048	125	2584	3.77219e+31	snRNA:U2:14B,Thor,eIF2B-alpha,eIF2B-delta,eIF5B,CG17737
	dme04745	Phototransduction - fly	0.739647	-0.301582	1	27	1	0.008	125	2584	34012	ninaC
	ko04745	Phototransduction - fly	0.739647	-0.301582	1	27	1	0.008	125	2584	34012	ninaC
	ko04141	Protein processing in endoplasmic reticulum	0.740942	-0.299834	1	126	5	0.04	125	2584	3.10144e+24	Roc1a,Hsc70-4,Der-2,TER94,prtp
	dme04141	Protein processing in endoplasmic reticulum	0.740942	-0.299834	1	126	5	0.04	125	2584	3.10144e+24	Roc1a,Hsc70-4,Der-2,TER94,prtp
	dme_M00160	V-type ATPase, eukaryotes	0.78697	-0.239566	1	31	1	0.008	125	2584	40389	VhaM9.7-b
	M00160	V-type ATPase, eukaryotes	0.78697	-0.239566	1	31	1	0.008	125	2584	40389	VhaM9.7-b
	ko04350	TGF-beta signaling pathway	0.816765	-0.202404	1	34	1	0.008	125	2584	31014	Roc1a
	dme04350	TGF-beta signaling pathway	0.816765	-0.202404	1	34	1	0.008	125	2584	31014	Roc1a
	ko00562	Inositol phosphate metabolism	0.834292	-0.181172	1	36	1	0.008	125	2584	39739	CG17026
	ko04150	mTOR signaling pathway	0.834292	-0.181172	1	36	1	0.008	125	2584	33569	Thor
	dme04150	mTOR signaling pathway	0.834292	-0.181172	1	36	1	0.008	125	2584	33569	Thor
	dme00562	Inositol phosphate metabolism	0.834292	-0.181172	1	36	1	0.008	125	2584	39739	CG17026
	ko03420	Nucleotide excision repair	0.857512	-0.15372	1	39	1	0.008	125	2584	31014	Roc1a
	dme03420	Nucleotide excision repair	0.857512	-0.15372	1	39	1	0.008	125	2584	31014	Roc1a
	ko04120	Ubiquitin mediated proteolysis	0.863395	-0.146883	1	98	3	0.024	125	2584	362463101440610	Roc2,Roc1a,UbcD6
	dme04120	Ubiquitin mediated proteolysis	0.863395	-0.146883	1	98	3	0.024	125	2584	362463101440610	Roc2,Roc1a,UbcD6
	M00355	Spliceosome, 35S U5-snRNP	0.86451	-0.145592	1	40	1	0.008	125	2584	41840	Hsc70-4
	dme_M00355	Spliceosome, 35S U5-snRNP	0.86451	-0.145592	1	40	1	0.008	125	2584	41840	Hsc70-4
	dme03040	Spliceosome	0.865846	-0.144048	1	125	4	0.032	125	2584	3.77219e+21	snRNA:U2:14B,CG7288,Hsc70-4,CG6610
	ko03040	Spliceosome	0.865846	-0.144048	1	125	4	0.032	125	2584	3.77219e+21	snRNA:U2:14B,CG7288,Hsc70-4,CG6610
	dme00190	Oxidative phosphorylation	0.869942	-0.139329	1	126	4	0.032	125	2584	4.03893e+19	VhaM9.7-b,CG11043,Pdsw,CG4692
	ko00190	Oxidative phosphorylation	0.869942	-0.139329	1	126	4	0.032	125	2584	4.03893e+19	VhaM9.7-b,CG11043,CG4692,Pdsw
	ko04070	Phosphatidylinositol signaling system	0.871168	-0.137921	1	41	1	0.008	125	2584	39739	CG17026
	dme04070	Phosphatidylinositol signaling system	0.871168	-0.137921	1	41	1	0.008	125	2584	39739	CG17026
	ko04145	Phagosome	0.882217	-0.125318	1	74	2	0.016	125	2584	4038933941	VhaM9.7-b,Tsp
	dme04145	Phagosome	0.882217	-0.125318	1	74	2	0.016	125	2584	4038933941	VhaM9.7-b,Tsp
	dme00561	Glycerolipid metabolism	0.889254	-0.117372	1	44	1	0.008	125	2584	35966	wun
	ko00561	Glycerolipid metabolism	0.889254	-0.117372	1	44	1	0.008	125	2584	35966	wun
	dme00620	Pyruvate metabolism	0.918211	-0.0853283	1	50	1	0.008	125	2584	35656	CG1707
	ko00620	Pyruvate metabolism	0.918211	-0.0853283	1	50	1	0.008	125	2584	35656	CG1707
	dme03008	Ribosome biogenesis in eukaryotes	0.927771	-0.0749703	1	86	2	0.016	125	2584	3113637300	CG42666,CkIIbeta2
	ko03008	Ribosome biogenesis in eukaryotes	0.927771	-0.0749703	1	86	2	0.016	125	2584	3113637300	CG42666,CkIIbeta2
	dme00330	Arginine and proline metabolism	0.929732	-0.0728593	1	53	1	0.008	125	2584	32087	Gs2
	ko00330	Arginine and proline metabolism	0.929732	-0.0728593	1	53	1	0.008	125	2584	32087	Gs2
	dme04146	Peroxisome	0.9672	-0.0333499	1	68	1	0.008	125	2584	33016	CG9577
	ko04146	Peroxisome	0.9672	-0.0333499	1	68	1	0.008	125	2584	33016	CG9577
	M00073	N-glycan precursor trimming	1	-9.45963e-13	1	5	0	0	125	2584
	M00082	Fatty acid biosynthesis, initiation	1	-9.45963e-13	1	5	0	0	125	2584
	M00307	Pyruvate oxidation, pyruvate => acetyl-CoA	1	-9.45963e-13	1	5	0	0	125	2584
	dme_M00082	Fatty acid biosynthesis, initiation	1	-9.45963e-13	1	5	0	0	125	2584
	dme_M00059	Glycosaminoglycan biosynthesis, heparan sulfate backbone	1	-9.45963e-13	1	5	0	0	125	2584
	dme_M00415	Fatty acid biosynthesis, elongation, endoplasmic reticulum	1	-9.45963e-13	1	5	0	0	125	2584
	M00094	Ceramide biosynthesis	1	-9.45963e-13	1	5	0	0	125	2584
	M00405	THC complex	1	-9.45963e-13	1	5	0	0	125	2584
	M00059	Glycosaminoglycan biosynthesis, heparan sulfate backbone	1	-9.45963e-13	1	5	0	0	125	2584
	dme_M00128	Ubiquinone biosynthesis, eukaryotes, 4-hydroxybenzoate => ubiquinone	1	-9.45963e-13	1	5	0	0	125	2584
	M00415	Fatty acid biosynthesis, elongation, endoplasmic reticulum	1	-9.45963e-13	1	5	0	0	125	2584
	M00006	Pentose phosphate pathway, oxidative phase, glucose 6P => ribulose 5P	1	-9.45963e-13	1	5	0	0	125	2584
	dme_M00120	Coenzyme A biosynthesis, pantothenate => CoA	1	-9.45963e-13	1	5	0	0	125	2584
	dme_M00307	Pyruvate oxidation, pyruvate => acetyl-CoA	1	-9.45963e-13	1	5	0	0	125	2584
	dme_M00006	Pentose phosphate pathway, oxidative phase, glucose 6P => ribulose 5P	1	-9.45963e-13	1	5	0	0	125	2584
	dme_M00405	THC complex	1	-9.45963e-13	1	5	0	0	125	2584
	M00289	RF-C complex	1	-9.45963e-13	1	5	0	0	125	2584
	M00085	Fatty acid biosynthesis, elongation, mitochondria	1	-9.45963e-13	1	5	0	0	125	2584
	M00128	Ubiquinone biosynthesis, eukaryotes, 4-hydroxybenzoate => ubiquinone	1	-9.45963e-13	1	5	0	0	125	2584
	M00013	Malonate semialdehyde pathway, propanoyl-CoA => Acetyl-CoA	1	-9.45963e-13	1	5	0	0	125	2584
	dme_M00013	Malonate semialdehyde pathway, propanoyl-CoA => Acetyl-CoA	1	-9.45963e-13	1	5	0	0	125	2584
	dme_M00094	Ceramide biosynthesis	1	-9.45963e-13	1	5	0	0	125	2584
	dme_M00085	Fatty acid biosynthesis, elongation, mitochondria	1	-9.45963e-13	1	5	0	0	125	2584
	M00120	Coenzyme A biosynthesis, pantothenate => CoA	1	-9.45963e-13	1	5	0	0	125	2584
	dme_M00073	N-glycan precursor trimming	1	-9.45963e-13	1	5	0	0	125	2584
	dme_M00289	RF-C complex	1	-9.45963e-13	1	5	0	0	125	2584
	dme00780	Biotin metabolism	1	3.46575e-13	1	3	0	0	125	2584
	ko00785	Lipoic acid metabolism	1	3.46575e-13	1	3	0	0	125	2584
	dme_M00288	RPA complex	1	3.46575e-13	1	3	0	0	125	2584
	M00288	RPA complex	1	3.46575e-13	1	3	0	0	125	2584
	dme_M00151	Cytochrome bc1 complex respiratory unit	1	3.46575e-13	1	3	0	0	125	2584
	M00141	C1-unit interconversion, eukaryotes	1	3.46575e-13	1	3	0	0	125	2584
	dme_M00015	Proline biosynthesis, glutamate => proline	1	3.46575e-13	1	3	0	0	125	2584
	M00399	Cap binding complex	1	3.46575e-13	1	3	0	0	125	2584
	M00291	MRN complex	1	3.46575e-13	1	3	0	0	125	2584
	dme00785	Lipoic acid metabolism	1	3.46575e-13	1	3	0	0	125	2584
	M00046	Pyrimidine degradation, uracil => beta-alanine, thymine => 3-aminoisobutanoate	1	3.46575e-13	1	3	0	0	125	2584
	dme00730	Thiamine metabolism	1	3.46575e-13	1	3	0	0	125	2584
	dme_M00134	Polyamine biosynthesis, arginine => ornithine => putrescine	1	3.46575e-13	1	3	0	0	125	2584
	dme_M00399	Cap binding complex	1	3.46575e-13	1	3	0	0	125	2584
	M00151	Cytochrome bc1 complex respiratory unit	1	3.46575e-13	1	3	0	0	125	2584
	dme_M00086	beta-Oxidation, acyl-CoA synthesis	1	3.46575e-13	1	3	0	0	125	2584
	ko00730	Thiamine metabolism	1	3.46575e-13	1	3	0	0	125	2584
	dme_M00046	Pyrimidine degradation, uracil => beta-alanine, thymine => 3-aminoisobutanoate	1	3.46575e-13	1	3	0	0	125	2584
	M00392	Ski complex	1	3.46575e-13	1	3	0	0	125	2584
	M00410	ESCRT-II complex	1	3.46575e-13	1	3	0	0	125	2584
	ko00780	Biotin metabolism	1	3.46575e-13	1	3	0	0	125	2584
	M00134	Polyamine biosynthesis, arginine => ornithine => putrescine	1	3.46575e-13	1	3	0	0	125	2584
	dme_M00020	Serine biosynthesis, glycerate-3P => serine	1	3.46575e-13	1	3	0	0	125	2584
	dme_M00141	C1-unit interconversion, eukaryotes	1	3.46575e-13	1	3	0	0	125	2584
	dme_M00410	ESCRT-II complex	1	3.46575e-13	1	3	0	0	125	2584
	dme00471	D-Glutamine and D-glutamate metabolism	1	3.46575e-13	1	3	0	0	125	2584
	M00020	Serine biosynthesis, glycerate-3P => serine	1	3.46575e-13	1	3	0	0	125	2584
	ko00460	Cyanoamino acid metabolism	1	3.46575e-13	1	3	0	0	125	2584
	M00015	Proline biosynthesis, glutamate => proline	1	3.46575e-13	1	3	0	0	125	2584
	M00086	beta-Oxidation, acyl-CoA synthesis	1	3.46575e-13	1	3	0	0	125	2584
	dme_M00291	MRN complex	1	3.46575e-13	1	3	0	0	125	2584
	dme_M00392	Ski complex	1	3.46575e-13	1	3	0	0	125	2584
	ko00471	D-Glutamine and D-glutamate metabolism	1	3.46575e-13	1	3	0	0	125	2584
	dme00460	Cyanoamino acid metabolism	1	3.46575e-13	1	3	0	0	125	2584
	M00036	Leucine degradation, leucine => acetoacetate + acetyl-CoA	1	1.2128e-12	1	11	0	0	125	2584
	M00130	Inositol phosphate metabolism, PI=> PIP2 => Ins(1,4,5)P3 => Ins(1,3,4,5)P4	1	1.2128e-12	1	11	0	0	125	2584
	dme_M00036	Leucine degradation, leucine => acetoacetate + acetyl-CoA	1	1.2128e-12	1	11	0	0	125	2584
	dme_M00130	Inositol phosphate metabolism, PI=> PIP2 => Ins(1,4,5)P3 => Ins(1,3,4,5)P4	1	1.2128e-12	1	11	0	0	125	2584
	ko00232	Caffeine metabolism	1	1.38342e-12	1	2	0	0	125	2584
	ko00290	Valine, leucine and isoleucine biosynthesis	1	1.38342e-12	1	2	0	0	125	2584
	M00293	DNA polymerase zeta complex	1	1.38342e-12	1	2	0	0	125	2584
	dme00290	Valine, leucine and isoleucine biosynthesis	1	1.38342e-12	1	2	0	0	125	2584
	dme00232	Caffeine metabolism	1	1.38342e-12	1	2	0	0	125	2584
	M00408	ESCRT-0 complex	1	1.38342e-12	1	2	0	0	125	2584
	dme_M00294	DNA polymerase gamma complex	1	1.38342e-12	1	2	0	0	125	2584
	dme00100	Steroid biosynthesis	1	1.38342e-12	1	2	0	0	125	2584
	M00100	Sphingosine degradation	1	1.38342e-12	1	2	0	0	125	2584
	ko00100	Steroid biosynthesis	1	1.38342e-12	1	2	0	0	125	2584
	M00554	Nucleotide sugar biosynthesis, galactose => UDP-galactose	1	1.38342e-12	1	2	0	0	125	2584
	dme_M00100	Sphingosine degradation	1	1.38342e-12	1	2	0	0	125	2584
	dme_M00293	DNA polymerase zeta complex	1	1.38342e-12	1	2	0	0	125	2584
	dme_M00408	ESCRT-0 complex	1	1.38342e-12	1	2	0	0	125	2584
	dme_M00554	Nucleotide sugar biosynthesis, galactose => UDP-galactose	1	1.38342e-12	1	2	0	0	125	2584
	M00294	DNA polymerase gamma complex	1	1.38342e-12	1	2	0	0	125	2584
	ko00514	Other types of O-glycan biosynthesis	1	1.39788e-12	1	12	0	0	125	2584
	dme_M00180	RNA polymerase II, eukaryotes	1	1.39788e-12	1	12	0	0	125	2584
	dme00670	One carbon pool by folate	1	1.39788e-12	1	12	0	0	125	2584
	M00180	RNA polymerase II, eukaryotes	1	1.39788e-12	1	12	0	0	125	2584
	dme00514	Other types of O-glycan biosynthesis	1	1.39788e-12	1	12	0	0	125	2584
	dme00592	alpha-Linolenic acid metabolism	1	1.39788e-12	1	12	0	0	125	2584
	dme_M00182	RNA polymerase I, eukaryotes	1	1.39788e-12	1	12	0	0	125	2584
	ko00670	One carbon pool by folate	1	1.39788e-12	1	12	0	0	125	2584
	M00182	RNA polymerase I, eukaryotes	1	1.39788e-12	1	12	0	0	125	2584
	ko00592	alpha-Linolenic acid metabolism	1	1.39788e-12	1	12	0	0	125	2584
	dme00400	Phenylalanine, tyrosine and tryptophan biosynthesis	1	2.50021e-12	1	4	0	0	125	2584
	M00083	Fatty acid biosynthesis, elongation	1	2.50021e-12	1	4	0	0	125	2584
	dme_M00263	DNA polymerase epsilon complex	1	2.50021e-12	1	4	0	0	125	2584
	M00426	Survival motor neuron (SMN) complex	1	2.50021e-12	1	4	0	0	125	2584
	dme_M00390	Exosome, archaea	1	2.50021e-12	1	4	0	0	125	2584
	M00263	DNA polymerase epsilon complex	1	2.50021e-12	1	4	0	0	125	2584
	M00027	GABA (gamma-Aminobutyrate) shunt	1	2.50021e-12	1	4	0	0	125	2584
	dme00601	Glycosphingolipid biosynthesis - lacto and neolacto series	1	2.50021e-12	1	4	0	0	125	2584
	M00402	Translocon-associated protein (TRAP) complex	1	2.50021e-12	1	4	0	0	125	2584
	dme_M00286	GINS complex	1	2.50021e-12	1	4	0	0	125	2584
	dme_M00425	H/ACA ribonucleoprotein complex	1	2.50021e-12	1	4	0	0	125	2584
	dme_M00083	Fatty acid biosynthesis, elongation	1	2.50021e-12	1	4	0	0	125	2584
	ko00533	Glycosaminoglycan biosynthesis - keratan sulfate	1	2.50021e-12	1	4	0	0	125	2584
	M00401	Sec61 complex	1	2.50021e-12	1	4	0	0	125	2584
	dme_M00261	DNA polymerase alpha / primase complex	1	2.50021e-12	1	4	0	0	125	2584
	ko00400	Phenylalanine, tyrosine and tryptophan biosynthesis	1	2.50021e-12	1	4	0	0	125	2584
	dme_M00401	Sec61 complex	1	2.50021e-12	1	4	0	0	125	2584
	dme00533	Glycosaminoglycan biosynthesis - keratan sulfate	1	2.50021e-12	1	4	0	0	125	2584
	dme_M00118	Glutathione biosynthesis, glutamate => glutathione	1	2.50021e-12	1	4	0	0	125	2584
	M00286	GINS complex	1	2.50021e-12	1	4	0	0	125	2584
	M00425	H/ACA ribonucleoprotein complex	1	2.50021e-12	1	4	0	0	125	2584
	ko00601	Glycosphingolipid biosynthesis - lacto and neolacto series	1	2.50021e-12	1	4	0	0	125	2584
	M00118	Glutathione biosynthesis, glutamate => glutathione	1	2.50021e-12	1	4	0	0	125	2584
	M00261	DNA polymerase alpha / primase complex	1	2.50021e-12	1	4	0	0	125	2584
	dme_M00402	Translocon-associated protein (TRAP) complex	1	2.50021e-12	1	4	0	0	125	2584
	dme_M00426	Survival motor neuron (SMN) complex	1	2.50021e-12	1	4	0	0	125	2584
	dme_M00027	GABA (gamma-Aminobutyrate) shunt	1	2.50021e-12	1	4	0	0	125	2584
	M00390	Exosome, archaea	1	2.50021e-12	1	4	0	0	125	2584
	dme00750	Vitamin B6 metabolism	1	2.76925e-12	1	6	0	0	125	2584
	ko03450	Non-homologous end-joining	1	2.76925e-12	1	6	0	0	125	2584
	dme_M00285	MCM complex	1	2.76925e-12	1	6	0	0	125	2584
	M00284	Origin recognition complex	1	2.76925e-12	1	6	0	0	125	2584
	M00052	Pyrimidine ribonucleotide biosynthesis, UMP => UDP/UTP,CDP/CTP	1	2.76925e-12	1	6	0	0	125	2584
	dme03450	Non-homologous end-joining	1	2.76925e-12	1	6	0	0	125	2584
	M00404	COPII complex	1	2.76925e-12	1	6	0	0	125	2584
	ko00061	Fatty acid biosynthesis	1	2.76925e-12	1	6	0	0	125	2584
	dme_M00284	Origin recognition complex	1	2.76925e-12	1	6	0	0	125	2584
	dme00061	Fatty acid biosynthesis	1	2.76925e-12	1	6	0	0	125	2584
	dme00604	Glycosphingolipid biosynthesis - ganglio series	1	2.76925e-12	1	6	0	0	125	2584
	dme_M00404	COPII complex	1	2.76925e-12	1	6	0	0	125	2584
	M00285	MCM complex	1	2.76925e-12	1	6	0	0	125	2584
	ko00750	Vitamin B6 metabolism	1	2.76925e-12	1	6	0	0	125	2584
	dme_M00052	Pyrimidine ribonucleotide biosynthesis, UMP => UDP/UTP,CDP/CTP	1	2.76925e-12	1	6	0	0	125	2584
	ko00604	Glycosphingolipid biosynthesis - ganglio series	1	2.76925e-12	1	6	0	0	125	2584
	dme_M00295	BRCA1-associated genome surveillance complex (BASC)	1	3.01687e-12	1	16	0	0	125	2584
	M00295	BRCA1-associated genome surveillance complex (BASC)	1	3.01687e-12	1	16	0	0	125	2584
	M00181	RNA polymerase III, eukaryotes	1	3.01687e-12	1	16	0	0	125	2584
	dme_M00181	RNA polymerase III, eukaryotes	1	3.01687e-12	1	16	0	0	125	2584
	dme_M00072	N-glycosylation by oligosaccharyltransferase	1	3.69702e-12	1	7	0	0	125	2584
	dme00430	Taurine and hypotaurine metabolism	1	3.69702e-12	1	7	0	0	125	2584
	M00398	Sm core complex	1	3.69702e-12	1	7	0	0	125	2584
	ko00603	Glycosphingolipid biosynthesis - globo series	1	3.69702e-12	1	7	0	0	125	2584
	dme00072	Synthesis and degradation of ketone bodies	1	3.69702e-12	1	7	0	0	125	2584
	M00099	Sphingosine biosynthesis	1	3.69702e-12	1	7	0	0	125	2584
	M00072	N-glycosylation by oligosaccharyltransferase	1	3.69702e-12	1	7	0	0	125	2584
	dme_M00099	Sphingosine biosynthesis	1	3.69702e-12	1	7	0	0	125	2584
	dme_M00148	Succinate dehydrogenase (ubiquinone)	1	3.69702e-12	1	7	0	0	125	2584
	M00148	Succinate dehydrogenase (ubiquinone)	1	3.69702e-12	1	7	0	0	125	2584
	ko00591	Linoleic acid metabolism	1	3.69702e-12	1	7	0	0	125	2584
	dme00603	Glycosphingolipid biosynthesis - globo series	1	3.69702e-12	1	7	0	0	125	2584
	dme00591	Linoleic acid metabolism	1	3.69702e-12	1	7	0	0	125	2584
	dme_M00398	Sm core complex	1	3.69702e-12	1	7	0	0	125	2584
	ko00430	Taurine and hypotaurine metabolism	1	3.69702e-12	1	7	0	0	125	2584
	ko00072	Synthesis and degradation of ketone bodies	1	3.69702e-12	1	7	0	0	125	2584
	dme00360	Phenylalanine metabolism	1	3.75371e-12	1	10	0	0	125	2584
	ko00360	Phenylalanine metabolism	1	3.75371e-12	1	10	0	0	125	2584
	dme00770	Pantothenate and CoA biosynthesis	1	3.75371e-12	1	10	0	0	125	2584
	M00290	Holo-TFIIH complex	1	3.75371e-12	1	10	0	0	125	2584
	dme_M00290	Holo-TFIIH complex	1	3.75371e-12	1	10	0	0	125	2584
	ko00770	Pantothenate and CoA biosynthesis	1	3.75371e-12	1	10	0	0	125	2584
	dme_M00055	N-glycan precursor biosynthesis	1	3.84677e-12	1	13	0	0	125	2584
	M00055	N-glycan precursor biosynthesis	1	3.84677e-12	1	13	0	0	125	2584
	dme_M00050	Guanine ribonucleotide biosynthesis IMP => GDP,GTP	1	3.84677e-12	1	13	0	0	125	2584
	M00050	Guanine ribonucleotide biosynthesis IMP => GDP,GTP	1	3.84677e-12	1	13	0	0	125	2584
	ko00472	D-Arginine and D-ornithine metabolism	1	4.48738e-12	1	1	0	0	125	2584
	ko00300	Lysine biosynthesis	1	4.48738e-12	1	1	0	0	125	2584
	dme00300	Lysine biosynthesis	1	4.48738e-12	1	1	0	0	125	2584
	M00005	PRPP biosynthesis, ribose 5P => PRPP	1	4.48738e-12	1	1	0	0	125	2584
	dme_M00005	PRPP biosynthesis, ribose 5P => PRPP	1	4.48738e-12	1	1	0	0	125	2584
	dme00472	D-Arginine and D-ornithine metabolism	1	4.48738e-12	1	1	0	0	125	2584
	dme_M00143	NADH dehydrogenase (ubiquinone) Fe-S protein/flavoprotein complex, mitochondria	1	4.98482e-12	1	14	0	0	125	2584
	M00143	NADH dehydrogenase (ubiquinone) Fe-S protein/flavoprotein complex, mitochondria	1	4.98482e-12	1	14	0	0	125	2584
	ko00981	Insect hormone biosynthesis	1	4.98482e-12	1	14	0	0	125	2584
	dme00981	Insect hormone biosynthesis	1	4.98482e-12	1	14	0	0	125	2584
	dme_M00146	NADH dehydrogenase (ubiquinone) 1 alpha subcomplex	1	4.98482e-12	1	14	0	0	125	2584
	M00146	NADH dehydrogenase (ubiquinone) 1 alpha subcomplex	1	4.98482e-12	1	14	0	0	125	2584
	M00095	C5 isoprenoid biosynthesis, mevalonate pathway	1	5.53573e-12	1	8	0	0	125	2584
	dme00340	Histidine metabolism	1	5.53573e-12	1	8	0	0	125	2584
	M00632	Galactose degradation, Leloir pathway, galactose => alpha-D-glucose-1P	1	5.53573e-12	1	8	0	0	125	2584
	M00428	eIF4F complex	1	5.53573e-12	1	8	0	0	125	2584
	M00412	ESCRT-III complex	1	5.53573e-12	1	8	0	0	125	2584
	dme_M00412	ESCRT-III complex	1	5.53573e-12	1	8	0	0	125	2584
	dme_M00361	Nucleotide sugar biosynthesis, eukaryotes	1	5.53573e-12	1	8	0	0	125	2584
	dme_M00428	eIF4F complex	1	5.53573e-12	1	8	0	0	125	2584
	dme_M00632	Galactose degradation, Leloir pathway, galactose => alpha-D-glucose-1P	1	5.53573e-12	1	8	0	0	125	2584
	M00361	Nucleotide sugar biosynthesis, eukaryotes	1	5.53573e-12	1	8	0	0	125	2584
	ko00340	Histidine metabolism	1	5.53573e-12	1	8	0	0	125	2584
	dme_M00095	C5 isoprenoid biosynthesis, mevalonate pathway	1	5.53573e-12	1	8	0	0	125	2584
	ko00130	Ubiquinone and other terpenoid-quinone biosynthesis	1	5.58004e-12	1	9	0	0	125	2584
	dme04711	Circadian rhythm - fly	1	5.58004e-12	1	9	0	0	125	2584
	dme00130	Ubiquinone and other terpenoid-quinone biosynthesis	1	5.58004e-12	1	9	0	0	125	2584
	M00351	Spliceosome, U1-snRNP	1	5.58004e-12	1	9	0	0	125	2584
	M00406	TREX complex	1	5.58004e-12	1	9	0	0	125	2584
	M00391	Exosome, eukaryotes	1	5.58004e-12	1	9	0	0	125	2584
	dme02010	ABC transporters	1	5.58004e-12	1	9	0	0	125	2584
	dme_M00351	Spliceosome, U1-snRNP	1	5.58004e-12	1	9	0	0	125	2584
	ko02010	ABC transporters	1	5.58004e-12	1	9	0	0	125	2584
	dme_M00391	Exosome, eukaryotes	1	5.58004e-12	1	9	0	0	125	2584
	dme_M00406	TREX complex	1	5.58004e-12	1	9	0	0	125	2584
	M00049	Adenine ribonucleotide biosynthesis, IMP => ADP,ATP	1	5.66103e-12	1	15	0	0	125	2584
	M00389	APC/C complex	1	5.66103e-12	1	15	0	0	125	2584
	dme_M00389	APC/C complex	1	5.66103e-12	1	15	0	0	125	2584
	dme00512	Mucin type O-Glycan biosynthesis	1	5.66103e-12	1	15	0	0	125	2584
	ko00512	Mucin type O-Glycan biosynthesis	1	5.66103e-12	1	15	0	0	125	2584
	dme_M00049	Adenine ribonucleotide biosynthesis, IMP => ADP,ATP	1	5.66103e-12	1	15	0	0	125	2584
	dme_M00430	Exon junction complex (EJC)	1	8.1912e-12	1	17	0	0	125	2584
	dme01040	Biosynthesis of unsaturated fatty acids	1	8.1912e-12	1	17	0	0	125	2584
	M00430	Exon junction complex (EJC)	1	8.1912e-12	1	17	0	0	125	2584
	ko01040	Biosynthesis of unsaturated fatty acids	1	8.1912e-12	1	17	0	0	125	2584
	M00011	Citrate cycle, second carbon oxidation, 2-oxoglutarate => oxaloacetate	1	8.2432e-12	1	23	0	0	125	2584
	dme_M00011	Citrate cycle, second carbon oxidation, 2-oxoglutarate => oxaloacetate	1	8.2432e-12	1	23	0	0	125	2584
	M00352	Spliceosome, U2-snRNP	1	9.43494e-12	1	19	0	0	125	2584
	ko00380	Tryptophan metabolism	1	9.43494e-12	1	19	0	0	125	2584
	dme_M00352	Spliceosome, U2-snRNP	1	9.43494e-12	1	19	0	0	125	2584
	dme00380	Tryptophan metabolism	1	9.43494e-12	1	19	0	0	125	2584
	dme03440	Homologous recombination	1	9.78766e-12	1	20	0	0	125	2584
	dme03410	Base excision repair	1	9.78766e-12	1	20	0	0	125	2584
	ko03430	Mismatch repair	1	9.78766e-12	1	20	0	0	125	2584
	ko03410	Base excision repair	1	9.78766e-12	1	20	0	0	125	2584
	dme03430	Mismatch repair	1	9.78766e-12	1	20	0	0	125	2584
	dme00640	Propanoate metabolism	1	9.78766e-12	1	20	0	0	125	2584
	ko03440	Homologous recombination	1	9.78766e-12	1	20	0	0	125	2584
	ko00640	Propanoate metabolism	1	9.78766e-12	1	20	0	0	125	2584
	dme04013	MAPK signaling pathway - fly	1	1.08231e-11	1	18	0	0	125	2584
	ko04140	Regulation of autophagy	1	1.08231e-11	1	18	0	0	125	2584
	ko04013	MAPK signaling pathway - fly	1	1.08231e-11	1	18	0	0	125	2584
	dme04140	Regulation of autophagy	1	1.08231e-11	1	18	0	0	125	2584
	dme00410	beta-Alanine metabolism	1	1.08231e-11	1	18	0	0	125	2584
	ko00410	beta-Alanine metabolism	1	1.08231e-11	1	18	0	0	125	2584
	dme03460	Fanconi anemia pathway	1	1.16512e-11	1	26	0	0	125	2584
	ko03460	Fanconi anemia pathway	1	1.16512e-11	1	26	0	0	125	2584
	ko00790	Folate biosynthesis	1	1.19802e-11	1	24	0	0	125	2584
	dme00790	Folate biosynthesis	1	1.19802e-11	1	24	0	0	125	2584
	dme03020	RNA polymerase	1	1.24143e-11	1	28	0	0	125	2584
	ko03020	RNA polymerase	1	1.24143e-11	1	28	0	0	125	2584
	dme03060	Protein export	1	1.24922e-11	1	22	0	0	125	2584
	ko03060	Protein export	1	1.24922e-11	1	22	0	0	125	2584
	dme00310	Lysine degradation	1	1.50118e-11	1	31	0	0	125	2584
	ko00310	Lysine degradation	1	1.50118e-11	1	31	0	0	125	2584
	dme_M00427	Nuclear pore complex	1	1.52293e-11	1	33	0	0	125	2584
	M00427	Nuclear pore complex	1	1.52293e-11	1	33	0	0	125	2584
	ko04320	Dorso-ventral axis formation	1	1.57905e-11	1	27	0	0	125	2584
	dme04320	Dorso-ventral axis formation	1	1.57905e-11	1	27	0	0	125	2584
	ko03022	Basal transcription factors	1	1.73602e-11	1	39	0	0	125	2584
	dme03022	Basal transcription factors	1	1.73602e-11	1	39	0	0	125	2584
	ko00510	N-Glycan biosynthesis	1	1.85532e-11	1	37	0	0	125	2584
	dme00510	N-Glycan biosynthesis	1	1.85532e-11	1	37	0	0	125	2584
	ko04080	Neuroactive ligand-receptor interaction	1	2.01437e-11	1	44	0	0	125	2584
	dme04080	Neuroactive ligand-receptor interaction	1	2.01437e-11	1	44	0	0	125	2584
	ko03030	DNA replication	1	2.07271e-11	1	35	0	0	125	2584
	dme03030	DNA replication	1	2.07271e-11	1	35	0	0	125	2584
	ko03015	mRNA surveillance pathway	1	2.32138e-11	1	70	0	0	125	2584
	dme03015	mRNA surveillance pathway	1	2.32138e-11	1	70	0	0	125	2584
	dme04068	FoxO signaling pathway	1	2.38213e-11	1	51	0	0	125	2584

## Sheet: Cl6
Significant Kegg terms	TermID	Term	Enrichment	logP	FDR_BH	Genes in Term	Target Genes in Term	Fraction of Targets in Term	Total Target Genes	Total Genes	Entrez Gene IDs	Gene Symbols
FDR_BH p<0.01	dme00190	Oxidative phosphorylation	1.48984e-10	-22.6272	3.6352e-08	126	40	0.137931	290	2584	4.37983e+200	CG1970,CG12400,CG10320,Oscp,ND23,CG9306,CG3214,CG5548,CG10396,CG4769,CG3446,ox,l(1)G0230,CG3560,CG6463,RFeSP,CG32230,ATPsyn-gamma,CG3192,CG14482,CG6020,Vha13,Vha36-1,CG5037,CG8680,CG3321,Vha36-3,CG12203,CG11455,CG5703,Vha68-1,CG9350,CG7712,Vha14-1,Vha26,sun,l(2)35Di,SdhC,CG15434,CG1746
	ko00190	Oxidative phosphorylation	1.48984e-10	-22.6272	3.6352e-08	126	40	0.137931	290	2584	3.35284e+200	CG12400,CG1970,CG10320,Oscp,ND23,CG9306,CG3214,CG5548,CG10396,CG4769,CG3446,ox,l(1)G0230,CG3560,CG6463,RFeSP,CG32230,ATPsyn-gamma,CG3192,CG14482,CG6020,Vha13,Vha36-1,CG5037,CG8680,CG3321,Vha36-3,CG11455,CG12203,CG5703,Vha68-1,CG7712,CG9350,Vha14-1,Vha26,l(2)35Di,sun,SdhC,CG15434,CG1746
	ko03010	Ribosome	1.03787e-06	-13.7783	0.00012662	131	34	0.117241	290	2584	3.37033e+174	mRpL24,RpL5,mRpL34,mRpL27,RpL35A,mRpS6,mRpS7,bonsai,mRpS9,RpL36A,RpS23,RpS15,mRpL1,RpL30,RpL28,mRpL28,mRpL32,mRpL21,mRpL17,mRpL12,RpL35,mRpL23,mRpL13,RpL3,mRpL22,mRpL2,mRpL14,mRpL36,RpL13A,mRpL20,mRpS18C,mRpS10,mRpL35,mRpS17
	dme03010	Ribosome	1.03787e-06	-13.7783	0.00012662	131	34	0.117241	290	2584	3.37033e+174	mRpL24,RpL5,mRpL34,mRpL27,RpL35A,mRpS6,mRpS7,bonsai,mRpS9,RpL36A,RpS23,RpS15,mRpL1,RpL30,RpL28,mRpL28,mRpL32,mRpL21,mRpL17,mRpL12,RpL35,mRpL23,mRpL13,RpL3,mRpL22,mRpL2,mRpL14,mRpL36,RpL13A,mRpL20,mRpS18C,mRpS10,mRpL35,mRpS17
	dme_M00146	NADH dehydrogenase (ubiquinone) 1 alpha subcomplex	3.75643e-05	-10.1895	0.0030552	14	8	0.0275862	290	2584	4.02723e+40	CG6020,CG32230,CG7712,CG9350,CG3214,CG3446,CG15434,CG6463
FDR_BH p<0.01	M00146	NADH dehydrogenase (ubiquinone) 1 alpha subcomplex	3.75643e-05	-10.1895	0.0030552	14	8	0.0275862	290	2584	4.02723e+40	CG6020,CG32230,CG7712,CG9350,CG3214,CG3446,CG15434,CG6463
Significant Kegg terms	dme_M00134	Polyamine biosynthesis, arginine => ornithine => putrescine	0.0014006	-6.57085	0.080126	3	3	0.0103448	290	2584	467173576735766	arg,Odc2,Odc1
Enrichment p<0.01	M00134	Polyamine biosynthesis, arginine => ornithine => putrescine	0.0014006	-6.57085	0.080126	3	3	0.0103448	290	2584	467173576735766	arg,Odc2,Odc1
	dme_M00147	NADH dehydrogenase (ubiquinone) 1 beta subcomplex	0.00164194	-6.41188	0.080126	13	6	0.0206897	290	2584	3.24343e+29	CG5548,l(2)35Di,CG3192,CG12400,CG10320,CG9306
	M00147	NADH dehydrogenase (ubiquinone) 1 beta subcomplex	0.00164194	-6.41188	0.080126	13	6	0.0206897	290	2584	3.24343e+29	CG5548,l(2)35Di,CG3192,CG12400,CG10320,CG9306
	ko01200	Carbon metabolism	0.00228558	-6.08114	0.090832	105	22	0.0758621	290	2584	4.12534e+110	CG3999,Hex-C,AcCoAS,CG5261,Pgd,CG17333,CG5214,CG6439,l(1)G0255,l(1)G0334,kdn,CG5044,CG6543,Pglym78,CG31874,Hex-A,Spat,CG6415,Nc73EF,CG11876,SdhC,CG17896
	dme01200	Carbon metabolism	0.00228558	-6.08114	0.090832	105	22	0.0758621	290	2584	4.12534e+110	CG3999,Hex-C,AcCoAS,CG5261,Pgd,CG17333,CG5214,CG6439,l(1)G0255,l(1)G0334,kdn,CG5044,CG6543,Pglym78,CG31874,Hex-A,Spat,CG6415,Nc73EF,CG11876,SdhC,CG17896
	dme_M00143	NADH dehydrogenase (ubiquinone) Fe-S protein/flavoprotein complex, mitochondria	0.00260582	-5.95001	0.090832	14	6	0.0206897	290	2584	4.37984e+29	CG1970,ND23,CG12203,CG11455,CG8680,CG5703
	M00143	NADH dehydrogenase (ubiquinone) Fe-S protein/flavoprotein complex, mitochondria	0.00260582	-5.95001	0.090832	14	6	0.0206897	290	2584	4.37984e+29	CG1970,ND23,CG12203,CG11455,CG8680,CG5703
	dme00480	Glutathione metabolism	0.00317302	-5.75307	0.096777	63	15	0.0517241	290	2584	3.94034e+75	CG4300,CG31233,GstD2,Odc2,Ggt-1,GstD4,CG4752,GstE4,Pgd,GstD8,GstE9,Odc1,GstE3,GstD7,GstD6
	ko00480	Glutathione metabolism	0.00317302	-5.75307	0.096777	63	15	0.0517241	290	2584	3.94034e+75	CG4300,CG31233,GstD2,Odc2,Ggt-1,GstD4,CG4752,GstE4,Pgd,GstD8,GstE9,Odc1,GstE3,GstD7,GstD6
	M00158	F-type ATPase, eukaryotes	0.00571889	-5.16398	0.15505	16	6	0.0206897	290	2584	4.35074e+29	ATPsyn-gamma,sun,Oscp,l(1)G0230,CG3321,CG1746
Enrichment p<0.01	dme_M00158	F-type ATPase, eukaryotes	0.00571889	-5.16398	0.15505	16	6	0.0206897	290	2584	4.35074e+29	ATPsyn-gamma,sun,Oscp,l(1)G0230,CG3321,CG1746
	ko00565	Ether lipid metabolism	0.0104329	-4.56279	0.21857	23	7	0.0241379	290	2584	4.04684e+34	laza,iPLA2-VIA,GIIIspla2,CG11425,CG11437,CG14507,CG7149
	dme00565	Ether lipid metabolism	0.0104329	-4.56279	0.21857	23	7	0.0241379	290	2584	4.04684e+34	laza,iPLA2-VIA,GIIIspla2,CG11425,CG11437,CG14507,CG7149
	dme00410	beta-Alanine metabolism	0.0109212	-4.51705	0.21857	18	6	0.0206897	290	2584	3.84844e+29	Gad1,CG4300,CG5044,su(r),CG17896,CG6543
	ko00410	beta-Alanine metabolism	0.0109212	-4.51705	0.21857	18	6	0.0206897	290	2584	3.84844e+29	Gad1,CG4300,CG5044,su(r),CG17896,CG6543
	M00307	Pyruvate oxidation, pyruvate => acetyl-CoA	0.0117735	-4.44191	0.21857	5	3	0.0103448	290	2584	314064343734021	l(1)G0334,CG11876,CG5261
	dme_M00307	Pyruvate oxidation, pyruvate => acetyl-CoA	0.0117735	-4.44191	0.21857	5	3	0.0103448	290	2584	314064343734021	l(1)G0334,CG11876,CG5261
	M00013	Malonate semialdehyde pathway, propanoyl-CoA => Acetyl-CoA	0.0117735	-4.44191	0.21857	5	3	0.0103448	290	2584	418693099536536	CG5044,CG17896,CG6543
	dme_M00013	Malonate semialdehyde pathway, propanoyl-CoA => Acetyl-CoA	0.0117735	-4.44191	0.21857	5	3	0.0103448	290	2584	418693099536536	CG5044,CG17896,CG6543
	ko00052	Galactose metabolism	0.0125411	-4.37875	0.21857	35	9	0.0310345	290	2584	4.40085e+44	Hex-C,Hex-A,Galk,CG7997,CG32444,Mal-A3,CG6084,Ect3,CG6083
	dme00052	Galactose metabolism	0.0125411	-4.37875	0.21857	35	9	0.0310345	290	2584	4.40085e+44	Hex-C,Hex-A,CG7997,Galk,Mal-A3,CG32444,CG6084,CG6083,Ect3
	ko00982	Drug metabolism - cytochrome P450	0.017512	-4.04487	0.25539	62	13	0.0448276	290	2584	4.83355e+67	GstD2,GstD4,Ugt86Dd,Fmo-1,GstE4,GstD8,GstE9,GstE3,Ugt37c1,Adh,GstD7,Ugt36Bc,GstD6
	dme00982	Drug metabolism - cytochrome P450	0.017512	-4.04487	0.25539	62	13	0.0448276	290	2584	4.83355e+67	GstD2,GstD4,Ugt86Dd,Fmo-1,GstE4,GstD8,GstE9,GstE3,Ugt37c1,Adh,GstD7,Ugt36Bc,GstD6
	ko00020	Citrate cycle (TCA cycle)	0.017767	-4.03041	0.25539	43	10	0.0344828	290	2584	3.18995e+50	CG31874,CG5261,CG6439,Nc73EF,CG5214,l(1)G0255,kdn,l(1)G0334,CG11876,SdhC
	dme00020	Citrate cycle (TCA cycle)	0.017767	-4.03041	0.25539	43	10	0.0344828	290	2584	3.18995e+50	CG31874,CG5261,CG5214,CG6439,Nc73EF,l(1)G0255,kdn,l(1)G0334,CG11876,SdhC
	dme00280	Valine, leucine and isoleucine degradation	0.0178583	-4.02529	0.25539	31	8	0.0275862	290	2584	3.24414e+39	CG5599,Hmgs,CG8778,CG5044,CG3902,CG17896,CG6543,CG3267
	ko00280	Valine, leucine and isoleucine degradation	0.0178583	-4.02529	0.25539	31	8	0.0275862	290	2584	3.24414e+39	CG5599,Hmgs,CG8778,CG5044,CG3902,CG17896,CG6543,CG3267
	dme00360	Phenylalanine metabolism	0.0188405	-3.97175	0.25539	10	4	0.0137931	290	2584	3.51903e+19	Ddc,CG1461,Prx2540-2,Hn
	ko00360	Phenylalanine metabolism	0.0188405	-3.97175	0.25539	10	4	0.0137931	290	2584	3.51903e+19	Ddc,CG1461,Prx2540-2,Hn
	dme00564	Glycerophospholipid metabolism	0.024361	-3.71477	0.31285	58	12	0.0413793	290	2584	3.95304e+59	CG8745,laza,CG7149,CG18815,iPLA2-VIA,Pect,Gpdh,GIIIspla2,Cha,CG11425,CG11437,CG14507
	ko00564	Glycerophospholipid metabolism	0.024361	-3.71477	0.31285	58	12	0.0413793	290	2584	3.95304e+59	CG8745,laza,CG7149,CG18815,iPLA2-VIA,Pect,Gpdh,GIIIspla2,Cha,CG11425,CG11437,CG14507
	ko00260	Glycine, serine and threonine metabolism	0.0308924	-3.47724	0.34032	28	7	0.0241379	290	2584	4.12533e+34	CG3999,CG6415,CG5955,CG6385,ppl,Spat,Pglym78
	dme00260	Glycine, serine and threonine metabolism	0.0308924	-3.47724	0.34032	28	7	0.0241379	290	2584	4.12533e+34	CG3999,CG6415,CG5955,CG6385,ppl,Spat,Pglym78
	ko01212	Fatty acid metabolism	0.0341401	-3.37728	0.34032	41	9	0.0310345	290	2584	3.65405e+44	CG16935,Acsl,bgm,CG8630,CG9747,CG9743,CG3902,CG6543,CG1444
	dme01212	Fatty acid metabolism	0.0341401	-3.37728	0.34032	41	9	0.0310345	290	2584	3.65405e+44	CG16935,Acsl,bgm,CG8630,CG9747,CG9743,CG3902,CG6543,CG1444
	M00397	Lsm 1-7 complex	0.034713	-3.36064	0.34032	7	3	0.0103448	290	2584	4.28424e+16	LSm3,LSm1,CG17768
	ko00591	Linoleic acid metabolism	0.034713	-3.36064	0.34032	7	3	0.0103448	290	2584	391603174743461	iPLA2-VIA,GIIIspla2,CG14507
	dme00591	Linoleic acid metabolism	0.034713	-3.36064	0.34032	7	3	0.0103448	290	2584	391603174743461	iPLA2-VIA,GIIIspla2,CG14507
	dme_M00397	Lsm 1-7 complex	0.034713	-3.36064	0.34032	7	3	0.0103448	290	2584	4.28424e+16	LSm3,LSm1,CG17768
	dme_M00151	Cytochrome bc1 complex respiratory unit	0.0348692	-3.35615	0.34032	3	2	0.00689655	290	2584	3861244390	CG4769,RFeSP
	M00151	Cytochrome bc1 complex respiratory unit	0.0348692	-3.35615	0.34032	3	2	0.00689655	290	2584	3861244390	CG4769,RFeSP
	dme_M00086	beta-Oxidation, acyl-CoA synthesis	0.0348692	-3.35615	0.34032	3	2	0.00689655	290	2584	4606844117	Acsl,bgm
	M00086	beta-Oxidation, acyl-CoA synthesis	0.0348692	-3.35615	0.34032	3	2	0.00689655	290	2584	4606844117	Acsl,bgm
	dme00980	Metabolism of xenobiotics by cytochrome P450	0.0392588	-3.23758	0.36843	62	12	0.0413793	290	2584	4.83355e+62	GstD2,GstD4,Ugt86Dd,GstE4,GstD8,GstE9,GstE3,Ugt37c1,Adh,GstD7,Ugt36Bc,GstD6
	ko00980	Metabolism of xenobiotics by cytochrome P450	0.0392588	-3.23758	0.36843	62	12	0.0413793	290	2584	4.83355e+62	GstD2,GstD4,Ugt86Dd,GstE4,GstD8,GstE9,GstE3,Ugt37c1,Adh,GstD7,Ugt36Bc,GstD6
	ko00350	Tyrosine metabolism	0.0430758	-3.14479	0.37538	18	5	0.0172414	290	2584	3.51903e+26	Ddc,CG9531,CG1461,ple,Adh
	dme00900	Terpenoid backbone biosynthesis	0.0430758	-3.14479	0.37538	18	5	0.0172414	290	2584	4.40023e+24	Sras,CG8239,Hmgs,qless,CG5919
	dme00350	Tyrosine metabolism	0.0430758	-3.14479	0.37538	18	5	0.0172414	290	2584	3.51903e+26	Ddc,CG9531,CG1461,ple,Adh
	ko00900	Terpenoid backbone biosynthesis	0.0430758	-3.14479	0.37538	18	5	0.0172414	290	2584	4.40023e+24	Sras,CG8239,Hmgs,qless,CG5919
	dme00620	Pyruvate metabolism	0.0470793	-3.05592	0.39612	50	10	0.0344828	290	2584	4.03483e+50	AcCoAS,CG31874,CG5261,l(1)G0255,CG6084,Acyp2,l(1)G0334,CG11876,ImpL3,CG6083
	ko00620	Pyruvate metabolism	0.0470793	-3.05592	0.39612	50	10	0.0344828	290	2584	4.03483e+50	AcCoAS,CG31874,CG5261,l(1)G0255,CG6084,Acyp2,l(1)G0334,CG11876,ImpL3,CG6083
	ko00590	Arachidonic acid metabolism	0.0489491	-3.01697	0.39812	13	4	0.0137931	290	2584	3.91603e+19	iPLA2-VIA,Ggt-1,GIIIspla2,CG14507
	dme00590	Arachidonic acid metabolism	0.0489491	-3.01697	0.39812	13	4	0.0137931	290	2584	3.91603e+19	iPLA2-VIA,Ggt-1,GIIIspla2,CG14507
	M00095	C5 isoprenoid biosynthesis, mevalonate pathway	0.0510191	-2.97555	0.40157	8	3	0.0103448	290	2584	325204415442526	CG8239,Hmgs,CG5919
	dme_M00095	C5 isoprenoid biosynthesis, mevalonate pathway	0.0510191	-2.97555	0.40157	8	3	0.0103448	290	2584	325204415442526	CG8239,Hmgs,CG5919
	ko00010	Glycolysis / Gluconeogenesis	0.0529904	-2.93764	0.40405	51	10	0.0344828	290	2584	4.40084e+51	Hex-C,AcCoAS,Hex-A,CG5261,CG32444,l(1)G0334,ImpL3,CG11876,Adh,Pglym78
	dme00010	Glycolysis / Gluconeogenesis	0.0529904	-2.93764	0.40405	51	10	0.0344828	290	2584	4.40084e+51	Hex-C,AcCoAS,Hex-A,CG5261,CG32444,l(1)G0334,CG11876,ImpL3,Adh,Pglym78
	dme00400	Phenylalanine, tyrosine and tryptophan biosynthesis	0.0646032	-2.73949	0.46488	4	2	0.00689655	290	2584	3238138871	CG1461,Hn
	ko00400	Phenylalanine, tyrosine and tryptophan biosynthesis	0.0646032	-2.73949	0.46488	4	2	0.00689655	290	2584	3238138871	CG1461,Hn
	dme00640	Propanoate metabolism	0.064778	-2.73679	0.46488	20	5	0.0172414	290	2584	4.03485e+24	AcCoAS,ImpL3,CG5044,CG17896,CG6543
	ko00640	Propanoate metabolism	0.064778	-2.73679	0.46488	20	5	0.0172414	290	2584	4.03485e+24	AcCoAS,ImpL3,CG5044,CG17896,CG6543
	ko00600	Sphingolipid metabolism	0.0854149	-2.46024	0.59546	28	6	0.0206897	290	2584	4.04684e+29	laza,CG7997,CG11425,CG11437,Ect3,schlank
	dme00600	Sphingolipid metabolism	0.0854149	-2.46024	0.59546	28	6	0.0206897	290	2584	4.04684e+29	laza,CG7997,CG11425,CG11437,Ect3,schlank
	M00009	Citrate cycle (TCA cycle, Krebs cycle)	0.0893076	-2.41567	0.60531	35	7	0.0241379	290	2584	4.13604e+35	CG5214,Nc73EF,CG6439,l(1)G0255,CG31874,kdn,SdhC
	dme_M00009	Citrate cycle (TCA cycle, Krebs cycle)	0.0893076	-2.41567	0.60531	35	7	0.0241379	290	2584	4.13604e+35	CG5214,Nc73EF,CG6439,l(1)G0255,CG31874,kdn,SdhC
	dme00770	Pantothenate and CoA biosynthesis	0.0924089	-2.38153	0.6094	10	3	0.0103448	290	2584	2.46533e+16	Ppcdc,eap,su(r)
	ko00770	Pantothenate and CoA biosynthesis	0.0924089	-2.38153	0.6094	10	3	0.0103448	290	2584	2.46533e+16	Ppcdc,eap,su(r)
	M00006	Pentose phosphate pathway, oxidative phase, glucose 6P => ribulose 5P	0.099823	-2.30436	0.62453	5	2	0.00689655	290	2584	3118532013	Pgd,CG17333
	dme_M00006	Pentose phosphate pathway, oxidative phase, glucose 6P => ribulose 5P	0.099823	-2.30436	0.62453	5	2	0.00689655	290	2584	3118532013	Pgd,CG17333
	M00085	Fatty acid biosynthesis, elongation, mitochondria	0.099823	-2.30436	0.62453	5	2	0.00689655	290	2584	3654036536	CG16935,CG6543
	dme_M00085	Fatty acid biosynthesis, elongation, mitochondria	0.099823	-2.30436	0.62453	5	2	0.00689655	290	2584	3654036536	CG16935,CG6543
	M00011	Citrate cycle, second carbon oxidation, 2-oxoglutarate => oxaloacetate	0.1068	-2.2368	0.65148	23	5	0.0172414	290	2584	4.13604e+25	CG5214,Nc73EF,l(1)G0255,CG31874,SdhC
	dme_M00011	Citrate cycle, second carbon oxidation, 2-oxoglutarate => oxaloacetate	0.1068	-2.2368	0.65148	23	5	0.0172414	290	2584	4.13604e+25	CG5214,Nc73EF,l(1)G0255,CG31874,SdhC
	dme01040	Biosynthesis of unsaturated fatty acids	0.114312	-2.16882	0.67926	17	4	0.0137931	290	2584	4.16294e+19	CG8630,CG9747,CG9743,CG1444
	ko01040	Biosynthesis of unsaturated fatty acids	0.114312	-2.16882	0.67926	17	4	0.0137931	290	2584	4.16294e+19	CG8630,CG9747,CG9743,CG1444
	M00036	Leucine degradation, leucine => acetoacetate + acetyl-CoA	0.116921	-2.14626	0.67926	11	3	0.0103448	290	2584	324413639259261	CG5599,CG8778,CG3267
	dme_M00036	Leucine degradation, leucine => acetoacetate + acetyl-CoA	0.116921	-2.14626	0.67926	11	3	0.0103448	290	2584	324413639259261	CG5599,CG8778,CG3267
	ko00790	Folate biosynthesis	0.123185	-2.09407	0.699	24	5	0.0172414	290	2584	3.17824e+24	CG12116,CG16771,Dhpr,CG8105,CG8147
	dme00790	Folate biosynthesis	0.123185	-2.09407	0.699	24	5	0.0172414	290	2584	3.17824e+24	CG12116,CG16771,Dhpr,CG8105,CG8147
	dme_M00160	V-type ATPase, eukaryotes	0.126119	-2.07053	0.69939	31	6	0.0206897	290	2584	4.47023e+29	Vha36-1,Vha36-3,Vha68-1,Vha14-1,Vha26,Vha13
	M00160	V-type ATPase, eukaryotes	0.126119	-2.07053	0.69939	31	6	0.0206897	290	2584	4.47023e+29	Vha36-1,Vha36-3,Vha68-1,Vha14-1,Vha26,Vha13
	dme_M00092	Phosphatidylethanolamine (PE) biosynthesis, ethanolamine => PE	0.138931	-1.97377	0.74518	6	2	0.00689655	290	2584	3471634063	Pect,CG7149
	M00092	Phosphatidylethanolamine (PE) biosynthesis, ethanolamine => PE	0.138931	-1.97377	0.74518	6	2	0.00689655	290	2584	3471634063	Pect,CG7149
	dme00592	alpha-Linolenic acid metabolism	0.143538	-1.94115	0.74518	12	3	0.0103448	290	2584	391603174743461	iPLA2-VIA,GIIIspla2,CG14507
	dme00062	Fatty acid elongation	0.143538	-1.94115	0.74518	12	3	0.0103448	290	2584	365403653631703	CG16935,CG6543,CG1444
	ko00592	alpha-Linolenic acid metabolism	0.143538	-1.94115	0.74518	12	3	0.0103448	290	2584	391603174743461	iPLA2-VIA,GIIIspla2,CG14507
	ko00062	Fatty acid elongation	0.143538	-1.94115	0.74518	12	3	0.0103448	290	2584	365403653631703	CG16935,CG6543,CG1444
	ko00380	Tryptophan metabolism	0.156367	-1.85555	0.79246	19	4	0.0137931	290	2584	3.51904e+19	Ddc,Nc73EF,CG6543,v
	dme00380	Tryptophan metabolism	0.156367	-1.85555	0.79246	19	4	0.0137931	290	2584	3.51904e+19	Ddc,Nc73EF,CG6543,v
	dme00270	Cysteine and methionine metabolism	0.159142	-1.83796	0.79246	26	5	0.0172414	290	2584	3.51524e+25	CG10621,CG4300,CG32068,CG1461,ImpL3
	ko00270	Cysteine and methionine metabolism	0.159142	-1.83796	0.79246	26	5	0.0172414	290	2584	3.51524e+25	CG10621,CG4300,CG32068,CG1461,ImpL3
	dme00430	Taurine and hypotaurine metabolism	0.180619	-1.71137	0.86414	7	2	0.00689655	290	2584	3848432839	Gad1,Ggt-1
	M00396	Lsm 2-8 complex	0.180619	-1.71137	0.86414	7	2	0.00689655	290	2584	428423772012	LSm3,CG17768
	dme_M00396	Lsm 2-8 complex	0.180619	-1.71137	0.86414	7	2	0.00689655	290	2584	428423772012	LSm3,CG17768
	ko00430	Taurine and hypotaurine metabolism	0.180619	-1.71137	0.86414	7	2	0.00689655	290	2584	3848432839	Gad1,Ggt-1
	dme03020	RNA polymerase	0.198802	-1.61545	0.86685	28	5	0.0172414	290	2584	4.25634e+25	RpI12,l(2)37Cg,RpII15,CG33051,Rpb7
	ko03020	RNA polymerase	0.198802	-1.61545	0.86685	28	5	0.0172414	290	2584	4.25634e+25	RpI12,l(2)37Cg,RpII15,CG33051,Rpb7
	dme00051	Fructose and mannose metabolism	0.198802	-1.61545	0.86685	28	5	0.0172414	290	2584	4.40084e+24	Hex-C,CG6084,Hex-A,CG6083,Sodh-1
	ko00051	Fructose and mannose metabolism	0.198802	-1.61545	0.86685	28	5	0.0172414	290	2584	4.40084e+24	Hex-C,CG6084,Hex-A,CG6083,Sodh-1
	dme00860	Porphyrin and chlorophyll metabolism	0.200983	-1.60454	0.86685	43	7	0.0241379	290	2584	3.43945e+34	CG5037,l(3)02640,Ugt37c1,Ugt36Bc,Ugt86Dd,Pbgs,Cchl
	ko00860	Porphyrin and chlorophyll metabolism	0.200983	-1.60454	0.86685	43	7	0.0241379	290	2584	3.43945e+34	CG5037,l(3)02640,Ugt37c1,Ugt36Bc,Ugt86Dd,Pbgs,Cchl
	M00089	Triacylglycerol biosynthesis	0.201708	-1.60094	0.86685	14	3	0.0103448	290	2584	404684047240470	laza,CG11425,CG11437
	dme_M00089	Triacylglycerol biosynthesis	0.201708	-1.60094	0.86685	14	3	0.0103448	290	2584	404684047240470	laza,CG11425,CG11437
	dme00230	Purine metabolism	0.209693	-1.56211	0.86685	131	18	0.062069	290	2584	3.28165e+90	CG6106,Aprt,Gyc88E,CG11811,RpII15,CG33051,Adgf-D,Gycalpha99B,Adk1,CG8891,l(2)37Cg,Ac76E,Rpb7,CG31183,RpI12,CG16758,Pde6,awd
	ko00230	Purine metabolism	0.209693	-1.56211	0.86685	131	18	0.062069	290	2584	3.28165e+90	CG6106,Aprt,Gyc88E,CG11811,RpII15,CG33051,Adgf-D,Gycalpha99B,Adk1,CG8891,l(2)37Cg,Ac76E,Rpb7,CG31183,RpI12,CG16758,Pde6,awd
	M00554	Nucleotide sugar biosynthesis, galactose => UDP-galactose	0.211901	-1.55163	0.86685	2	1	0.00344828	290	2584	39031	Galk
	dme_M00554	Nucleotide sugar biosynthesis, galactose => UDP-galactose	0.211901	-1.55163	0.86685	2	1	0.00344828	290	2584	39031	Galk
	dme00561	Glycerolipid metabolism	0.217748	-1.52442	0.86685	44	7	0.0241379	290	2584	4.04684e+34	laza,CG7997,CG6753,CG11425,CG6084,CG11437,CG6083
	ko00561	Glycerolipid metabolism	0.217748	-1.52442	0.86685	44	7	0.0241379	290	2584	4.04684e+34	laza,CG7997,CG6753,CG11425,CG6084,CG11437,CG6083
	dme00340	Histidine metabolism	0.223819	-1.49692	0.86685	8	2	0.00689655	290	2584	3519033902	Ddc,CG9531
	M00632	Galactose degradation, Leloir pathway, galactose => alpha-D-glucose-1P	0.223819	-1.49692	0.86685	8	2	0.00689655	290	2584	3903140406	Galk,CG32444
	M00549	Nucleotide sugar biosynthesis, glucose => UDP-glucose	0.223819	-1.49692	0.86685	8	2	0.00689655	290	2584	4400845875	Hex-C,Hex-A
	M00428	eIF4F complex	0.223819	-1.49692	0.86685	8	2	0.00689655	290	2584	43839326255	eIF4G,4EHP
	M00412	ESCRT-III complex	0.223819	-1.49692	0.86685	8	2	0.00689655	290	2584	3996437581	CG6259,Vps20
	dme_M00412	ESCRT-III complex	0.223819	-1.49692	0.86685	8	2	0.00689655	290	2584	3996437581	CG6259,Vps20
	dme_M00428	eIF4F complex	0.223819	-1.49692	0.86685	8	2	0.00689655	290	2584	43839326255	eIF4G,4EHP
	dme_M00632	Galactose degradation, Leloir pathway, galactose => alpha-D-glucose-1P	0.223819	-1.49692	0.86685	8	2	0.00689655	290	2584	3903140406	Galk,CG32444
	dme_M00549	Nucleotide sugar biosynthesis, glucose => UDP-glucose	0.223819	-1.49692	0.86685	8	2	0.00689655	290	2584	4400845875	Hex-C,Hex-A
	ko00340	Histidine metabolism	0.223819	-1.49692	0.86685	8	2	0.00689655	290	2584	3519033902	Ddc,CG9531
	ko00040	Pentose and glucuronate interconversions	0.234997	-1.44818	0.89592	45	7	0.0241379	290	2584	3.93045e+34	CG6084,Ugt37c1,CG7322,CG6083,Ugt36Bc,Sodh-1,Ugt86Dd
	dme00040	Pentose and glucuronate interconversions	0.234997	-1.44818	0.89592	45	7	0.0241379	290	2584	3.93043e+34	CG6084,CG7322,Ugt37c1,CG6083,Ugt36Bc,Sodh-1,Ugt86Dd
	dme00071	Fatty acid degradation	0.241421	-1.42121	0.90626	30	5	0.0172414	290	2584	4.60684e+26	Acsl,bgm,Adh,CG3902,CG6543
	ko00071	Fatty acid degradation	0.241421	-1.42121	0.90626	30	5	0.0172414	290	2584	4.60684e+26	Acsl,bgm,Adh,CG6543,CG3902
	ko00830	Retinol metabolism	0.263594	-1.33335	0.93977	31	5	0.0172414	290	2584	3.36795e+26	CG15629,Ugt37c1,Adh,Ugt36Bc,Ugt86Dd
	dme00830	Retinol metabolism	0.263594	-1.33335	0.93977	31	5	0.0172414	290	2584	3.36795e+26	CG15629,Ugt37c1,Adh,Ugt36Bc,Ugt86Dd
	ko00130	Ubiquinone and other terpenoid-quinone biosynthesis	0.26767	-1.318	0.93977	9	2	0.00689655	290	2584	4400732381	COQ7,CG1461
	dme_M00034	Methionine salvage pathway	0.26767	-1.318	0.93977	9	2	0.00689655	290	2584	32618932381	CG32068,CG1461
	dme00130	Ubiquinone and other terpenoid-quinone biosynthesis	0.26767	-1.318	0.93977	9	2	0.00689655	290	2584	4400732381	COQ7,CG1461
	M00034	Methionine salvage pathway	0.26767	-1.318	0.93977	9	2	0.00689655	290	2584	32618932381	CG32068,CG1461
	ko00983	Drug metabolism - other enzymes	0.27075	-1.30656	0.93977	47	7	0.0241379	290	2584	4.32403e+34	CG6330,CG8891,Ugt37c1,su(r),Ugt36Bc,Ugt86Dd,Est-6
	dme00983	Drug metabolism - other enzymes	0.27075	-1.30656	0.93977	47	7	0.0241379	290	2584	4.32403e+34	CG6330,CG8891,Ugt37c1,su(r),Ugt36Bc,Ugt86Dd,Est-6
	dme00630	Glyoxylate and dicarboxylate metabolism	0.279587	-1.27444	0.93977	24	4	0.0137931	290	2584	3.77178e+21	CG18003,kdn,ppl,Spat
	ko00630	Glyoxylate and dicarboxylate metabolism	0.279587	-1.27444	0.93977	24	4	0.0137931	290	2584	3.77178e+21	CG18003,kdn,ppl,Spat
	dme00910	Nitrogen metabolism	0.296356	-1.21619	0.93977	17	3	0.0103448	290	2584	437014326441238	CG3669,CG6074,CG3940
	ko00910	Nitrogen metabolism	0.296356	-1.21619	0.93977	17	3	0.0103448	290	2584	437014326441238	CG3669,CG6074,CG3940
	ko00650	Butanoate metabolism	0.296356	-1.21619	0.93977	17	3	0.0103448	290	2584	384844415436536	Gad1,Hmgs,CG6543
	dme00650	Butanoate metabolism	0.296356	-1.21619	0.93977	17	3	0.0103448	290	2584	384844415436536	Gad1,Hmgs,CG6543
	ko00785	Lipoic acid metabolism	0.300418	-1.20258	0.93977	3	1	0.00344828	290	2584	40565	CG9804
	dme_M00015	Proline biosynthesis, glutamate => proline	0.300418	-1.20258	0.93977	3	1	0.00344828	290	2584	40443	CG7470
	dme00785	Lipoic acid metabolism	0.300418	-1.20258	0.93977	3	1	0.00344828	290	2584	40565	CG9804
	M00046	Pyrimidine degradation, uracil => beta-alanine, thymine => 3-aminoisobutanoate	0.300418	-1.20258	0.93977	3	1	0.00344828	290	2584	31858	su(r)
	dme_M00046	Pyrimidine degradation, uracil => beta-alanine, thymine => 3-aminoisobutanoate	0.300418	-1.20258	0.93977	3	1	0.00344828	290	2584	31858	su(r)
	ko01220	Degradation of aromatic compounds	0.300418	-1.20258	0.93977	3	1	0.00344828	290	2584	3771877	Adh
	dme01220	Degradation of aromatic compounds	0.300418	-1.20258	0.93977	3	1	0.00344828	290	2584	3771877	Adh
	dme00471	D-Glutamine and D-glutamate metabolism	0.300418	-1.20258	0.93977	3	1	0.00344828	290	2584	36396	CG42708
	ko00460	Cyanoamino acid metabolism	0.300418	-1.20258	0.93977	3	1	0.00344828	290	2584	32839	Ggt-1
	M00015	Proline biosynthesis, glutamate => proline	0.300418	-1.20258	0.93977	3	1	0.00344828	290	2584	40443	CG7470
	ko00471	D-Glutamine and D-glutamate metabolism	0.300418	-1.20258	0.93977	3	1	0.00344828	290	2584	36396	CG42708
	dme00460	Cyanoamino acid metabolism	0.300418	-1.20258	0.93977	3	1	0.00344828	290	2584	32839	Ggt-1
	M00004	Pentose phosphate pathway (Pentose phosphate cycle)	0.354722	-1.03642	1	11	2	0.00689655	290	2584	3118532013	Pgd,CG17333
	dme_M00004	Pentose phosphate pathway (Pentose phosphate cycle)	0.354722	-1.03642	1	11	2	0.00689655	290	2584	3118532013	Pgd,CG17333
	dme_M00014	Glucuronate pathway (uronate pathway)	0.355743	-1.03355	1	35	5	0.0172414	290	2584	3.28805e+24	CG7322,Ugt37c1,Ugt36Bc,Sodh-1,Ugt86Dd
	M00014	Glucuronate pathway (uronate pathway)	0.355743	-1.03355	1	35	5	0.0172414	290	2584	3.28805e+24	CG7322,Ugt37c1,Ugt36Bc,Sodh-1,Ugt86Dd
	dme04745	Phototransduction - fly	0.359579	-1.02282	1	27	4	0.0137931	290	2584	3.63294e+19	Cam,Gbeta76C,Pkc53E,Arr2
	ko04745	Phototransduction - fly	0.359579	-1.02282	1	27	4	0.0137931	290	2584	3.63294e+19	Cam,Gbeta76C,Pkc53E,Arr2
	dme_M00390	Exosome, archaea	0.379022	-0.97016	1	4	1	0.00344828	290	2584	34721	Ski6
	M00027	GABA (gamma-Aminobutyrate) shunt	0.379022	-0.97016	1	4	1	0.00344828	290	2584	38484	Gad1
	dme_M00425	H/ACA ribonucleoprotein complex	0.379022	-0.97016	1	4	1	0.00344828	290	2584	37397	CG4038
	dme_M00057	Glycosaminoglycan biosynthesis, linkage tetrasaccharide	0.379022	-0.97016	1	4	1	0.00344828	290	2584	35848	beta3GalTII
	M00057	Glycosaminoglycan biosynthesis, linkage tetrasaccharide	0.379022	-0.97016	1	4	1	0.00344828	290	2584	35848	beta3GalTII
	M00425	H/ACA ribonucleoprotein complex	0.379022	-0.97016	1	4	1	0.00344828	290	2584	37397	CG4038
	dme_M00027	GABA (gamma-Aminobutyrate) shunt	0.379022	-0.97016	1	4	1	0.00344828	290	2584	38484	Gad1
	M00390	Exosome, archaea	0.379022	-0.97016	1	4	1	0.00344828	290	2584	34721	Ski6
	dme00330	Arginine and proline metabolism	0.38437	-0.956149	1	53	7	0.0241379	290	2584	3.63965e+36	CG42708,arg,CG4300,Odc2,CG7470,Odc1,CG9510
	ko00330	Arginine and proline metabolism	0.38437	-0.956149	1	53	7	0.0241379	290	2584	3.63965e+36	CG42708,arg,CG4300,Odc2,CG7470,Odc1,CG9510
	dme_M00180	RNA polymerase II, eukaryotes	0.396959	-0.923922	1	12	2	0.00689655	290	2584	41741261631	RpII15,Rpb7
	dme00670	One carbon pool by folate	0.396959	-0.923922	1	12	2	0.00689655	290	2584	4369934474	CG1750,CG6415
	M00180	RNA polymerase II, eukaryotes	0.396959	-0.923922	1	12	2	0.00689655	290	2584	41741261631	RpII15,Rpb7
	M00010	Citrate cycle, first carbon oxidation, oxaloacetate => 2-oxoglutarate	0.396959	-0.923922	1	12	2	0.00689655	290	2584	4258631579	CG6439,kdn
	dme_M00182	RNA polymerase I, eukaryotes	0.396959	-0.923922	1	12	2	0.00689655	290	2584	4256335196	RpI12,l(2)37Cg
	ko00670	One carbon pool by folate	0.396959	-0.923922	1	12	2	0.00689655	290	2584	4369934474	CG1750,CG6415
	M00182	RNA polymerase I, eukaryotes	0.396959	-0.923922	1	12	2	0.00689655	290	2584	4256335196	RpI12,l(2)37Cg
	dme_M00010	Citrate cycle, first carbon oxidation, oxaloacetate => 2-oxoglutarate	0.396959	-0.923922	1	12	2	0.00689655	290	2584	4258631579	CG6439,kdn
	dme00250	Alanine, aspartate and glutamate metabolism	0.413029	-0.884237	1	29	4	0.0137931	290	2584	3.63964e+21	CG42708,Gad1,CG9510,Spat
	ko00250	Alanine, aspartate and glutamate metabolism	0.413029	-0.884237	1	29	4	0.0137931	290	2584	3.63964e+21	CG42708,Gad1,CG9510,Spat
	dme01230	Biosynthesis of amino acids	0.43011	-0.843714	1	64	8	0.0275862	290	2584	3.23814e+41	CG1461,CG7470,arg,CG6439,kdn,CG9510,Hn,Pglym78
	ko01230	Biosynthesis of amino acids	0.43011	-0.843714	1	64	8	0.0275862	290	2584	3.23814e+41	CG1461,CG7470,arg,CG6439,kdn,CG9510,Hn,Pglym78
	dme_M00050	Guanine ribonucleotide biosynthesis IMP => GDP,GTP	0.437876	-0.825819	1	13	2	0.00689655	290	2584	3921343739	CG11811,awd
	ko00740	Riboflavin metabolism	0.437876	-0.825819	1	13	2	0.00689655	290	2584	4011740118	CG9449,CG9451
	M00050	Guanine ribonucleotide biosynthesis IMP => GDP,GTP	0.437876	-0.825819	1	13	2	0.00689655	290	2584	3921343739	CG11811,awd
	dme00740	Riboflavin metabolism	0.437876	-0.825819	1	13	2	0.00689655	290	2584	4011740118	CG9449,CG9451
	dme00053	Ascorbate and aldarate metabolism	0.43943	-0.822276	1	30	4	0.0137931	290	2584	5.35834e+19	Ugt37c1,CG6910,Ugt36Bc,Ugt86Dd
	ko00053	Ascorbate and aldarate metabolism	0.43943	-0.822276	1	30	4	0.0137931	290	2584	5.35834e+19	Ugt37c1,CG6910,Ugt36Bc,Ugt86Dd
	M00354	Spliceosome, U4/U6.U5 tri-snRNP	0.43943	-0.822276	1	30	4	0.0137931	290	2584	4.28423e+21	LSm3,CG3436,CG17768,SmB
	dme_M00354	Spliceosome, U4/U6.U5 tri-snRNP	0.43943	-0.822276	1	30	4	0.0137931	290	2584	4.28423e+21	LSm3,CG3436,CG17768,SmB
	dme00240	Pyrimidine metabolism	0.440969	-0.818781	1	82	10	0.0344828	290	2584	4.32404e+50	CG6330,l(2)37Cg,CG8891,su(r),Rpb7,RpI12,CG16758,awd,CG33051,RpII15
	ko00240	Pyrimidine metabolism	0.440969	-0.818781	1	82	10	0.0344828	290	2584	4.32404e+50	CG6330,l(2)37Cg,CG8891,su(r),Rpb7,RpI12,CG16758,awd,CG33051,RpII15
	dme_M00415	Fatty acid biosynthesis, elongation, endoplasmic reticulum	0.448822	-0.801129	1	5	1	0.00344828	290	2584	31703	CG1444
	M00094	Ceramide biosynthesis	0.448822	-0.801129	1	5	1	0.00344828	290	2584	50392	schlank
	dme_M00128	Ubiquinone biosynthesis, eukaryotes, 4-hydroxybenzoate => ubiquinone	0.448822	-0.801129	1	5	1	0.00344828	290	2584	44007	COQ7
	M00415	Fatty acid biosynthesis, elongation, endoplasmic reticulum	0.448822	-0.801129	1	5	1	0.00344828	290	2584	31703	CG1444
	dme_M00120	Coenzyme A biosynthesis, pantothenate => CoA	0.448822	-0.801129	1	5	1	0.00344828	290	2584	246533	Ppcdc
	M00128	Ubiquinone biosynthesis, eukaryotes, 4-hydroxybenzoate => ubiquinone	0.448822	-0.801129	1	5	1	0.00344828	290	2584	44007	COQ7
	dme_M00094	Ceramide biosynthesis	0.448822	-0.801129	1	5	1	0.00344828	290	2584	50392	schlank
	M00120	Coenzyme A biosynthesis, pantothenate => CoA	0.448822	-0.801129	1	5	1	0.00344828	290	2584	246533	Ppcdc
	ko04145	Phagosome	0.452784	-0.79234	1	74	9	0.0310345	290	2584	3.12355e+44	Vha36-3,Vha68-1,Vha14-1,Vha26,Rac1,Vha13,Vha36-1,alphaTub85E,Mtl
	dme04145	Phagosome	0.452784	-0.79234	1	74	9	0.0310345	290	2584	3.12355e+44	Vha36-3,Vha68-1,Vha14-1,Vha26,Rac1,Vha13,Vha36-1,alphaTub85E,Mtl
	dme04146	Peroxisome	0.501061	-0.691028	1	68	8	0.0275862	290	2584	4.60684e+43	Acsl,CG18003,CG10194,CG1662,Prx5,CG32262,Spat,CG5948
	ko04146	Peroxisome	0.501061	-0.691028	1	68	8	0.0275862	290	2584	4.60684e+43	Acsl,CG18003,CG10194,CG1662,Prx5,CG32262,Spat,CG5948
	M00052	Pyrimidine ribonucleotide biosynthesis, UMP => UDP/UTP,CDP/CTP	0.5108	-0.671777	1	6	1	0.00344828	290	2584	43739	awd
	dme00604	Glycosphingolipid biosynthesis - ganglio series	0.5108	-0.671777	1	6	1	0.00344828	290	2584	41457	Ect3
	dme_M00052	Pyrimidine ribonucleotide biosynthesis, UMP => UDP/UTP,CDP/CTP	0.5108	-0.671777	1	6	1	0.00344828	290	2584	43739	awd
	ko00604	Glycosphingolipid biosynthesis - ganglio series	0.5108	-0.671777	1	6	1	0.00344828	290	2584	41457	Ect3
	M00049	Adenine ribonucleotide biosynthesis, IMP => ADP,ATP	0.514876	-0.663828	1	15	2	0.00689655	290	2584	3939643739	Adk1,awd
	dme_M00049	Adenine ribonucleotide biosynthesis, IMP => ADP,ATP	0.514876	-0.663828	1	15	2	0.00689655	290	2584	3939643739	Adk1,awd
	M00001	Glycolysis (Embden-Meyerhof pathway), glucose => pyruvate	0.515632	-0.662363	1	24	3	0.0103448	290	2584	440084587543447	Hex-C,Hex-A,Pglym78
	dme_M00001	Glycolysis (Embden-Meyerhof pathway), glucose => pyruvate	0.515632	-0.662363	1	24	3	0.0103448	290	2584	440084587543447	Hex-C,Hex-A,Pglym78
	dme00970	Aminoacyl-tRNA biosynthesis	0.51673	-0.660234	1	42	5	0.0172414	290	2584	4.36993e+24	CG1750,Aats-his,Aats-arg,Aats-phe,Aats-leu
	ko00970	Aminoacyl-tRNA biosynthesis	0.51673	-0.660234	1	42	5	0.0172414	290	2584	4.36993e+24	CG1750,Aats-his,Aats-arg,Aats-phe,Aats-leu
	ko00500	Starch and sucrose metabolism	0.517858	-0.658055	1	60	7	0.0241379	290	2584	4.40084e+34	Hex-C,Mal-A3,Tps1,Hex-A,Ugt37c1,Ugt36Bc,Ugt86Dd
	dme00500	Starch and sucrose metabolism	0.517858	-0.658055	1	60	7	0.0241379	290	2584	4.40084e+34	Hex-C,Mal-A3,Tps1,Hex-A,Ugt37c1,Ugt36Bc,Ugt86Dd
	dme_M00340	Proteasome, 20S core particle	0.544211	-0.608419	1	25	3	0.0103448	290	2584	396284526936018	Prosbeta2,Prosbeta5,Prosalpha7
	M00340	Proteasome, 20S core particle	0.544211	-0.608419	1	25	3	0.0103448	290	2584	396284526936018	Prosbeta2,Prosbeta5,Prosalpha7
	M00177	Ribosome, eukaryotes	0.550094	-0.597667	1	89	10	0.0344828	290	2584	3.14834e+51	RpL35,RpL35A,RpL5,RpL36A,RpL13A,RpS23,RpS15,RpL30,RpL28,RpL3
	dme_M00177	Ribosome, eukaryotes	0.550094	-0.597667	1	89	10	0.0344828	290	2584	3.14834e+51	RpL35,RpL35A,RpL5,RpL36A,RpL13A,RpS23,RpS15,RpL30,RpL28,RpL3
	M00181	RNA polymerase III, eukaryotes	0.550683	-0.596596	1	16	2	0.00689655	290	2584	3519639941	l(2)37Cg,CG33051
	dme00531	Glycosaminoglycan degradation	0.550683	-0.596596	1	16	2	0.00689655	290	2584	3639441457	CG8646,Ect3
	dme_M00181	RNA polymerase III, eukaryotes	0.550683	-0.596596	1	16	2	0.00689655	290	2584	3519639941	l(2)37Cg,CG33051
	ko00531	Glycosaminoglycan degradation	0.550683	-0.596596	1	16	2	0.00689655	290	2584	3639441457	CG8646,Ect3
	M00398	Sm core complex	0.56583	-0.569461	1	7	1	0.00344828	290	2584	34426	SmB
	ko00532	Glycosaminoglycan biosynthesis - chondroitin sulfate / dermatan sulfate	0.56583	-0.569461	1	7	1	0.00344828	290	2584	35848	beta3GalTII
	ko00603	Glycosphingolipid biosynthesis - globo series	0.56583	-0.569461	1	7	1	0.00344828	290	2584	36829	CG7997
	dme00072	Synthesis and degradation of ketone bodies	0.56583	-0.569461	1	7	1	0.00344828	290	2584	44154	Hmgs
	M00099	Sphingosine biosynthesis	0.56583	-0.569461	1	7	1	0.00344828	290	2584	50392	schlank
	dme_M00099	Sphingosine biosynthesis	0.56583	-0.569461	1	7	1	0.00344828	290	2584	50392	schlank
	dme_M00148	Succinate dehydrogenase (ubiquinone)	0.56583	-0.569461	1	7	1	0.00344828	290	2584	41340	SdhC
	M00148	Succinate dehydrogenase (ubiquinone)	0.56583	-0.569461	1	7	1	0.00344828	290	2584	41340	SdhC
	dme00603	Glycosphingolipid biosynthesis - globo series	0.56583	-0.569461	1	7	1	0.00344828	290	2584	36829	CG7997
	dme_M00398	Sm core complex	0.56583	-0.569461	1	7	1	0.00344828	290	2584	34426	SmB
	dme00532	Glycosaminoglycan biosynthesis - chondroitin sulfate / dermatan sulfate	0.56583	-0.569461	1	7	1	0.00344828	290	2584	35848	beta3GalTII
	ko00072	Synthesis and degradation of ketone bodies	0.56583	-0.569461	1	7	1	0.00344828	290	2584	44154	Hmgs
	ko00520	Amino sugar and nucleotide sugar metabolism	0.580737	-0.543457	1	45	5	0.0172414	290	2584	4.40083e+24	Hex-C,CG15771,Galk,Hex-A,CG5946
	dme00520	Amino sugar and nucleotide sugar metabolism	0.580737	-0.543457	1	45	5	0.0172414	290	2584	4.40083e+24	Hex-C,CG15771,Galk,Hex-A,CG5946
	M00359	Aminoacyl-tRNA biosynthesis, eukaryotes	0.587726	-0.531494	1	36	4	0.0137931	290	2584	3.28413e+19	Aats-his,Aats-arg,Aats-phe,Aats-leu
	ko00562	Inositol phosphate metabolism	0.587726	-0.531494	1	36	4	0.0137931	290	2584	4.03464e+19	CG9391,CG6910,Mipp1,CG17896
	dme_M00359	Aminoacyl-tRNA biosynthesis, eukaryotes	0.587726	-0.531494	1	36	4	0.0137931	290	2584	3.28413e+19	Aats-his,Aats-arg,Aats-phe,Aats-leu
	dme00562	Inositol phosphate metabolism	0.587726	-0.531494	1	36	4	0.0137931	290	2584	4.03464e+19	CG9391,CG6910,Mipp1,CG17896
	dme01210	2-Oxocarboxylic acid metabolism	0.61658	-0.483567	1	18	2	0.00689655	290	2584	4258631579	CG6439,kdn
	ko01210	2-Oxocarboxylic acid metabolism	0.61658	-0.483567	1	18	2	0.00689655	290	2584	4258631579	CG6439,kdn
	dme_M00154	Cytochrome c oxidase	0.646648	-0.435953	1	19	2	0.00689655	290	2584	3549134394	CG10396,CG5037
	M00154	Cytochrome c oxidase	0.646648	-0.435953	1	19	2	0.00689655	290	2584	3549134394	CG10396,CG5037
	M00351	Spliceosome, U1-snRNP	0.658067	-0.418449	1	9	1	0.00344828	290	2584	34426	SmB
	M00391	Exosome, eukaryotes	0.658067	-0.418449	1	9	1	0.00344828	290	2584	34721	Ski6
	dme_M00351	Spliceosome, U1-snRNP	0.658067	-0.418449	1	9	1	0.00344828	290	2584	34426	SmB
	dme_M00391	Exosome, eukaryotes	0.658067	-0.418449	1	9	1	0.00344828	290	2584	34721	Ski6
	M00355	Spliceosome, 35S U5-snRNP	0.672833	-0.396258	1	40	4	0.0137931	290	2584	4.09603e+19	CG9667,CG3436,SmB,l(1)10Bb
	dme_M00355	Spliceosome, 35S U5-snRNP	0.672833	-0.396258	1	40	4	0.0137931	290	2584	4.09603e+19	CG9667,CG3436,SmB,l(1)10Bb
	dme00310	Lysine degradation	0.693293	-0.366303	1	31	3	0.0103448	290	2584	413603989936536	CG5214,Nc73EF,CG6543
	ko00310	Lysine degradation	0.693293	-0.366303	1	31	3	0.0103448	290	2584	413603989936536	CG5214,Nc73EF,CG6543
	M00131	Inositol phosphate metabolism, Ins(1,3,4,5)P4 => Ins(1,3,4)P3 => myo-inositol	0.696576	-0.361579	1	10	1	0.00344828	290	2584	40346	CG9391
	ko00920	Sulfur metabolism	0.696576	-0.361579	1	10	1	0.00344828	290	2584	34996	Cyt-c-p
	dme_M00131	Inositol phosphate metabolism, Ins(1,3,4,5)P4 => Ins(1,3,4)P3 => myo-inositol	0.696576	-0.361579	1	10	1	0.00344828	290	2584	40346	CG9391
	dme00920	Sulfur metabolism	0.696576	-0.361579	1	10	1	0.00344828	290	2584	34996	Cyt-c-p
	ko03018	RNA degradation	0.726433	-0.31961	1	53	5	0.0172414	290	2584	4.28424e+26	LSm3,LSm1,CG17768,Ski6,Hsc70-5
	dme03018	RNA degradation	0.726433	-0.31961	1	53	5	0.0172414	290	2584	4.28424e+26	LSm3,LSm1,CG17768,Ski6,Hsc70-5
	dme04512	ECM-receptor interaction	0.730761	-0.313669	1	11	1	0.00344828	290	2584	31612	CG3168
	dme_M00380	SCF-BTRC complex	0.730761	-0.313669	1	11	1	0.00344828	290	2584	42504	slmb
	M00380	SCF-BTRC complex	0.730761	-0.313669	1	11	1	0.00344828	290	2584	42504	slmb
	ko04512	ECM-receptor interaction	0.730761	-0.313669	1	11	1	0.00344828	290	2584	31612	CG3168
	ko00030	Pentose phosphate pathway	0.7485	-0.289684	1	23	2	0.00689655	290	2584	3118532013	Pgd,CG17333
	dme00030	Pentose phosphate pathway	0.7485	-0.289684	1	23	2	0.00689655	290	2584	3118532013	Pgd,CG17333
	ko00514	Other types of O-glycan biosynthesis	0.761107	-0.272982	1	12	1	0.00344828	290	2584	35486	sxc
	dme00514	Other types of O-glycan biosynthesis	0.761107	-0.272982	1	12	1	0.00344828	290	2584	35486	sxc
	M00087	beta-Oxidation	0.761107	-0.272982	1	12	1	0.00344828	290	2584	36536	CG6543
	dme_M00087	beta-Oxidation	0.761107	-0.272982	1	12	1	0.00344828	290	2584	36536	CG6543
	dme00534	Glycosaminoglycan biosynthesis - heparan sulfate / heparin	0.761107	-0.272982	1	12	1	0.00344828	290	2584	35848	beta3GalTII
	ko00534	Glycosaminoglycan biosynthesis - heparan sulfate / heparin	0.761107	-0.272982	1	12	1	0.00344828	290	2584	35848	beta3GalTII
	ko04150	mTOR signaling pathway	0.786966	-0.23957	1	36	3	0.0103448	290	2584	4831138654326250	Pkc53E,S6k,4EHP
	dme04150	mTOR signaling pathway	0.786966	-0.23957	1	36	3	0.0103448	290	2584	4831138654326250	Pkc53E,S6k,4EHP
	dme_M00055	N-glycan precursor biosynthesis	0.788042	-0.238203	1	13	1	0.00344828	290	2584	41191	CG8412
	M00055	N-glycan precursor biosynthesis	0.788042	-0.238203	1	13	1	0.00344828	290	2584	41191	CG8412
	dme00760	Nicotinate and nicotinamide metabolism	0.788042	-0.238203	1	13	1	0.00344828	290	2584	38315	CG16758
	ko00760	Nicotinate and nicotinamide metabolism	0.788042	-0.238203	1	13	1	0.00344828	290	2584	38315	CG16758
	dme_M00003	Gluconeogenesis, oxaloacetate => fructose-6P	0.811951	-0.208316	1	14	1	0.00344828	290	2584	43447	Pglym78
	M00003	Gluconeogenesis, oxaloacetate => fructose-6P	0.811951	-0.208316	1	14	1	0.00344828	290	2584	43447	Pglym78
	dme_M00002	Glycolysis, core module involving three-carbon compounds	0.83317	-0.182517	1	15	1	0.00344828	290	2584	43447	Pglym78
	M00002	Glycolysis, core module involving three-carbon compounds	0.83317	-0.182517	1	15	1	0.00344828	290	2584	43447	Pglym78
	ko04070	Phosphatidylinositol signaling system	0.85569	-0.155848	1	41	3	0.0103448	290	2584	363294831140346	Cam,Pkc53E,CG9391
	dme04070	Phosphatidylinositol signaling system	0.85569	-0.155848	1	41	3	0.0103448	290	2584	363294831140346	Cam,Pkc53E,CG9391
	dme04310	Wnt signaling pathway	0.881016	-0.126679	1	88	7	0.0241379	290	2584	4.83115e+34	Pkc53E,CkIIalpha,Mtl,CanA1,Rac1,slmb,CtBP
	ko04310	Wnt signaling pathway	0.881016	-0.126679	1	88	7	0.0241379	290	2584	4.83115e+34	Pkc53E,CkIIalpha,Mtl,CanA1,Rac1,slmb,CtBP
	dme04013	MAPK signaling pathway - fly	0.883547	-0.123811	1	18	1	0.00344828	290	2584	34171	grk
	ko04013	MAPK signaling pathway - fly	0.883547	-0.123811	1	18	1	0.00344828	290	2584	34171	grk
	ko04080	Neuroactive ligand-receptor interaction	0.886923	-0.119997	1	44	3	0.0103448	290	2584	490804790137196	epsilonTry,betaTry,5-HT1A
	dme04080	Neuroactive ligand-receptor interaction	0.886923	-0.119997	1	44	3	0.0103448	290	2584	490804790137196	epsilonTry,betaTry,5-HT1A
	M00352	Spliceosome, U2-snRNP	0.896708	-0.109025	1	19	1	0.00344828	290	2584	34426	SmB
	dme_M00352	Spliceosome, U2-snRNP	0.896708	-0.109025	1	19	1	0.00344828	290	2584	34426	SmB
	ko04630	Jak-STAT signaling pathway	0.908387	-0.0960853	1	20	1	0.00344828	290	2584	35085	Socs36E
	dme03410	Base excision repair	0.908387	-0.0960853	1	20	1	0.00344828	290	2584	31806	Ogg1
	ko03410	Base excision repair	0.908387	-0.0960853	1	20	1	0.00344828	290	2584	31806	Ogg1
	dme04630	Jak-STAT signaling pathway	0.908387	-0.0960853	1	20	1	0.00344828	290	2584	35085	Socs36E
	dme03060	Protein export	0.927942	-0.0747861	1	22	1	0.00344828	290	2584	39222	CG6404
	dme04330	Notch signaling pathway	0.927942	-0.0747861	1	22	1	0.00344828	290	2584	41602	CtBP
	ko04330	Notch signaling pathway	0.927942	-0.0747861	1	22	1	0.00344828	290	2584	41602	CtBP
	ko03060	Protein export	0.927942	-0.0747861	1	22	1	0.00344828	290	2584	39222	CG6404
	ko00511	Other glycan degradation	0.927942	-0.0747861	1	22	1	0.00344828	290	2584	41457	Ect3
	dme00511	Other glycan degradation	0.927942	-0.0747861	1	22	1	0.00344828	290	2584	41457	Ect3
	dme03050	Proteasome	0.93192	-0.070508	1	50	3	0.0103448	290	2584	396284526936018	Prosbeta2,Prosbeta5,Prosalpha7
	ko03050	Proteasome	0.93192	-0.070508	1	50	3	0.0103448	290	2584	396284526936018	Prosbeta2,Prosbeta5,Prosalpha7
	ko04340	Hedgehog signaling pathway	0.943334	-0.0583344	1	24	1	0.00344828	290	2584	42504	slmb
	dme04340	Hedgehog signaling pathway	0.943334	-0.0583344	1	24	1	0.00344828	290	2584	42504	slmb
	dme04142	Lysosome	0.949874	-0.0514265	1	90	6	0.0206897	290	2584	3.63944e+29	CG8646,CG7997,Npc2h,Npc2g,DNaseII,Ect3
	ko04142	Lysosome	0.949874	-0.0514265	1	90	6	0.0206897	290	2584	3.63944e+29	CG8646,CG7997,Npc2h,Npc2g,DNaseII,Ect3
	ko04320	Dorso-ventral axis formation	0.960499	-0.0403027	1	27	1	0.00344828	290	2584	34171	grk
	dme04320	Dorso-ventral axis formation	0.960499	-0.0403027	1	27	1	0.00344828	290	2584	34171	grk
	ko04120	Ubiquitin mediated proteolysis	0.972096	-0.0283005	1	98	6	0.0206897	290	2584	4.17853e+31	eff,CG40045,CG7747,UbcD4,vih,slmb
	dme04120	Ubiquitin mediated proteolysis	0.972096	-0.0283005	1	98	6	0.0206897	290	2584	4.17853e+31	eff,CG40045,CG7747,UbcD4,vih,slmb
	dme_M00427	Nuclear pore complex	0.980831	-0.0193556	1	33	1	0.00344828	290	2584	33981	smt3
	M00427	Nuclear pore complex	0.980831	-0.0193556	1	33	1	0.00344828	290	2584	33981	smt3
	ko04350	TGF-beta signaling pathway	0.98301	-0.0171363	1	34	1	0.00344828	290	2584	38654	S6k
	dme04350	TGF-beta signaling pathway	0.98301	-0.0171363	1	34	1	0.00344828	290	2584	38654	S6k
	ko00510	N-Glycan biosynthesis	0.988174	-0.0118965	1	37	1	0.00344828	290	2584	41191	CG8412
	dme00510	N-Glycan biosynthesis	0.988174	-0.0118965	1	37	1	0.00344828	290	2584	41191	CG8412
	dme03040	Spliceosome	0.990982	-0.00905935	1	125	7	0.0241379	290	2584	4.28424e+38	LSm3,CG9667,CG3436,CG17768,SmB,l(1)10Bb,snRNA:U2:38ABb
	ko03040	Spliceosome	0.990982	-0.00905935	1	125	7	0.0241379	290	2584	4.28424e+38	LSm3,CG9667,CG3436,CG17768,SmB,l(1)10Bb,snRNA:U2:38ABb
	ko04391	Hippo signaling pathway - fly	0.991245	-0.00879372	1	57	2	0.00689655	290	2584	360543346149	egr,upd3
	dme04391	Hippo signaling pathway - fly	0.991245	-0.00879372	1	57	2	0.00689655	290	2584	360543346149	egr,upd3
	ko03013	RNA transport	0.99207	-0.00796121	1	139	8	0.0275862	290	2584	3.12564e+42	eIF2B-beta,eIF2B-gamma,eIF-3p66,smt3,snRNA:U2:38ABb,eIF4G,Adam,4EHP
	dme03013	RNA transport	0.99207	-0.00796121	1	139	8	0.0275862	290	2584	3.12564e+42	eIF2B-beta,eIF2B-gamma,eIF-3p66,smt3,snRNA:U2:38ABb,eIF4G,Adam,4EHP
	dme03008	Ribosome biogenesis in eukaryotes	0.997763	-0.00223931	1	86	3	0.0103448	290	2584	373973874948448	CG4038,CG8549,CkIIalpha
	ko03008	Ribosome biogenesis in eukaryotes	0.997763	-0.00223931	1	86	3	0.0103448	290	2584	373973874948448	CG4038,CG8549,CkIIalpha
	ko03015	mRNA surveillance pathway	0.997842	-0.00216051	1	70	2	0.00689655	290	2584	4024042368	eRF1,CG4733
	dme03015	mRNA surveillance pathway	0.997842	-0.00216051	1	70	2	0.00689655	290	2584	4024042368	eRF1,CG4733
	ko04144	Endocytosis	0.999673	-0.000327477	1	87	2	0.00689655	290	2584	3996437581	CG6259,Vps20
	dme04144	Endocytosis	0.999673	-0.000327477	1	87	2	0.00689655	290	2584	3996437581	CG6259,Vps20
	ko04141	Protein processing in endoplasmic reticulum	0.999968	-3.24686e-05	1	126	3	0.0103448	290	2584	3.94474e+16	CG10973,eff,CG40045
	dme04141	Protein processing in endoplasmic reticulum	0.999968	-3.24686e-05	1	126	3	0.0103448	290	2584	3.94474e+16	CG10973,eff,CG40045
	M00400	p97-Ufd1-Npl4 complex	1	-4.38108e-12	1	3	0	0	290	2584
	dme00780	Biotin metabolism	1	-4.38108e-12	1	3	0	0	290	2584
	dme_M00288	RPA complex	1	-4.38108e-12	1	3	0	0	290	2584
	dme_M00058	Glycosaminoglycan biosynthesis, chondroitin sulfate backbone	1	-4.38108e-12	1	3	0	0	290	2584
	M00288	RPA complex	1	-4.38108e-12	1	3	0	0	290	2584
	M00141	C1-unit interconversion, eukaryotes	1	-4.38108e-12	1	3	0	0	290	2584
	M00399	Cap binding complex	1	-4.38108e-12	1	3	0	0	290	2584
	M00291	MRN complex	1	-4.38108e-12	1	3	0	0	290	2584
	dme_M00400	p97-Ufd1-Npl4 complex	1	-4.38108e-12	1	3	0	0	290	2584
	dme00730	Thiamine metabolism	1	-4.38108e-12	1	3	0	0	290	2584
	dme_M00399	Cap binding complex	1	-4.38108e-12	1	3	0	0	290	2584
	M00058	Glycosaminoglycan biosynthesis, chondroitin sulfate backbone	1	-4.38108e-12	1	3	0	0	290	2584
	ko00730	Thiamine metabolism	1	-4.38108e-12	1	3	0	0	290	2584
	M00392	Ski complex	1	-4.38108e-12	1	3	0	0	290	2584
	M00410	ESCRT-II complex	1	-4.38108e-12	1	3	0	0	290	2584
	ko00780	Biotin metabolism	1	-4.38108e-12	1	3	0	0	290	2584
	M00051	Uridine monophosphate biosynthesis, glutamine (+ PRPP) => UMP	1	-4.38108e-12	1	3	0	0	290	2584
	dme_M00020	Serine biosynthesis, glycerate-3P => serine	1	-4.38108e-12	1	3	0	0	290	2584
	dme_M00141	C1-unit interconversion, eukaryotes	1	-4.38108e-12	1	3	0	0	290	2584
	dme_M00410	ESCRT-II complex	1	-4.38108e-12	1	3	0	0	290	2584
	M00020	Serine biosynthesis, glycerate-3P => serine	1	-4.38108e-12	1	3	0	0	290	2584
	dme_M00291	MRN complex	1	-4.38108e-12	1	3	0	0	290	2584
	dme_M00392	Ski complex	1	-4.38108e-12	1	3	0	0	290	2584
	dme_M00051	Uridine monophosphate biosynthesis, glutamine (+ PRPP) => UMP	1	-4.38108e-12	1	3	0	0	290	2584
	ko00232	Caffeine metabolism	1	-2.98799e-12	1	2	0	0	290	2584
	ko00290	Valine, leucine and isoleucine biosynthesis	1	-2.98799e-12	1	2	0	0	290	2584
	M00293	DNA polymerase zeta complex	1	-2.98799e-12	1	2	0	0	290	2584
	dme00290	Valine, leucine and isoleucine biosynthesis	1	-2.98799e-12	1	2	0	0	290	2584
	dme00232	Caffeine metabolism	1	-2.98799e-12	1	2	0	0	290	2584
	M00408	ESCRT-0 complex	1	-2.98799e-12	1	2	0	0	290	2584
	dme_M00294	DNA polymerase gamma complex	1	-2.98799e-12	1	2	0	0	290	2584
	dme00100	Steroid biosynthesis	1	-2.98799e-12	1	2	0	0	290	2584
	M00338	Cysteine biosynthesis, homocysteine + serine => cysteine	1	-2.98799e-12	1	2	0	0	290	2584
	dme_M00338	Cysteine biosynthesis, homocysteine + serine => cysteine	1	-2.98799e-12	1	2	0	0	290	2584
	M00100	Sphingosine degradation	1	-2.98799e-12	1	2	0	0	290	2584
	ko00100	Steroid biosynthesis	1	-2.98799e-12	1	2	0	0	290	2584
	dme_M00100	Sphingosine degradation	1	-2.98799e-12	1	2	0	0	290	2584
	dme_M00293	DNA polymerase zeta complex	1	-2.98799e-12	1	2	0	0	290	2584
	dme_M00408	ESCRT-0 complex	1	-2.98799e-12	1	2	0	0	290	2584
	M00294	DNA polymerase gamma complex	1	-2.98799e-12	1	2	0	0	290	2584
	M00384	Cul3-SPOP complex	1	-1.95847e-12	1	4	0	0	290	2584
	M00083	Fatty acid biosynthesis, elongation	1	-1.95847e-12	1	4	0	0	290	2584
	dme_M00263	DNA polymerase epsilon complex	1	-1.95847e-12	1	4	0	0	290	2584
	M00426	Survival motor neuron (SMN) complex	1	-1.95847e-12	1	4	0	0	290	2584
	M00263	DNA polymerase epsilon complex	1	-1.95847e-12	1	4	0	0	290	2584
	dme00601	Glycosphingolipid biosynthesis - lacto and neolacto series	1	-1.95847e-12	1	4	0	0	290	2584
	M00402	Translocon-associated protein (TRAP) complex	1	-1.95847e-12	1	4	0	0	290	2584
	dme_M00286	GINS complex	1	-1.95847e-12	1	4	0	0	290	2584
	dme_M00083	Fatty acid biosynthesis, elongation	1	-1.95847e-12	1	4	0	0	290	2584
	ko00533	Glycosaminoglycan biosynthesis - keratan sulfate	1	-1.95847e-12	1	4	0	0	290	2584
	M00401	Sec61 complex	1	-1.95847e-12	1	4	0	0	290	2584
	dme_M00261	DNA polymerase alpha / primase complex	1	-1.95847e-12	1	4	0	0	290	2584
	dme_M00401	Sec61 complex	1	-1.95847e-12	1	4	0	0	290	2584
	dme00533	Glycosaminoglycan biosynthesis - keratan sulfate	1	-1.95847e-12	1	4	0	0	290	2584
	dme_M00118	Glutathione biosynthesis, glutamate => glutathione	1	-1.95847e-12	1	4	0	0	290	2584
	M00286	GINS complex	1	-1.95847e-12	1	4	0	0	290	2584
	dme_M00384	Cul3-SPOP complex	1	-1.95847e-12	1	4	0	0	290	2584
	ko00601	Glycosphingolipid biosynthesis - lacto and neolacto series	1	-1.95847e-12	1	4	0	0	290	2584
	M00118	Glutathione biosynthesis, glutamate => glutathione	1	-1.95847e-12	1	4	0	0	290	2584
	M00261	DNA polymerase alpha / primase complex	1	-1.95847e-12	1	4	0	0	290	2584
	dme_M00402	Translocon-associated protein (TRAP) complex	1	-1.95847e-12	1	4	0	0	290	2584
	dme_M00426	Survival motor neuron (SMN) complex	1	-1.95847e-12	1	4	0	0	290	2584
	dme_M00007	Pentose phosphate pathway, non-oxidative phase, fructose 6P => ribose 5P	1	-6.91158e-13	1	5	0	0	290	2584
	M00073	N-glycan precursor trimming	1	-6.91158e-13	1	5	0	0	290	2584
	M00082	Fatty acid biosynthesis, initiation	1	-6.91158e-13	1	5	0	0	290	2584
	M00409	ESCRT-I complex	1	-6.91158e-13	1	5	0	0	290	2584
	dme_M00082	Fatty acid biosynthesis, initiation	1	-6.91158e-13	1	5	0	0	290	2584
	dme_M00059	Glycosaminoglycan biosynthesis, heparan sulfate backbone	1	-6.91158e-13	1	5	0	0	290	2584
	dme_M00409	ESCRT-I complex	1	-6.91158e-13	1	5	0	0	290	2584
	M00405	THC complex	1	-6.91158e-13	1	5	0	0	290	2584
	M00059	Glycosaminoglycan biosynthesis, heparan sulfate backbone	1	-6.91158e-13	1	5	0	0	290	2584
	M00007	Pentose phosphate pathway, non-oxidative phase, fructose 6P => ribose 5P	1	-6.91158e-13	1	5	0	0	290	2584
	dme_M00405	THC complex	1	-6.91158e-13	1	5	0	0	290	2584
	M00289	RF-C complex	1	-6.91158e-13	1	5	0	0	290	2584
	M00395	Decapping complex	1	-6.91158e-13	1	5	0	0	290	2584
	dme_M00073	N-glycan precursor trimming	1	-6.91158e-13	1	5	0	0	290	2584
	dme_M00395	Decapping complex	1	-6.91158e-13	1	5	0	0	290	2584
	dme_M00289	RF-C complex	1	-6.91158e-13	1	5	0	0	290	2584
	ko00472	D-Arginine and D-ornithine metabolism	1	1.2756e-12	1	1	0	0	290	2584
	ko00300	Lysine biosynthesis	1	1.2756e-12	1	1	0	0	290	2584
	dme00300	Lysine biosynthesis	1	1.2756e-12	1	1	0	0	290	2584
	M00005	PRPP biosynthesis, ribose 5P => PRPP	1	1.2756e-12	1	1	0	0	290	2584
	dme_M00005	PRPP biosynthesis, ribose 5P => PRPP	1	1.2756e-12	1	1	0	0	290	2584
	dme00472	D-Arginine and D-ornithine metabolism	1	1.2756e-12	1	1	0	0	290	2584
	dme00750	Vitamin B6 metabolism	1	3.34953e-12	1	6	0	0	290	2584
	ko03450	Non-homologous end-joining	1	3.34953e-12	1	6	0	0	290	2584
	dme_M00285	MCM complex	1	3.34953e-12	1	6	0	0	290	2584
	M00383	ECV complex	1	3.34953e-12	1	6	0	0	290	2584
	M00284	Origin recognition complex	1	3.34953e-12	1	6	0	0	290	2584
	dme03450	Non-homologous end-joining	1	3.34953e-12	1	6	0	0	290	2584
	M00404	COPII complex	1	3.34953e-12	1	6	0	0	290	2584
	ko00061	Fatty acid biosynthesis	1	3.34953e-12	1	6	0	0	290	2584
	dme_M00284	Origin recognition complex	1	3.34953e-12	1	6	0	0	290	2584
	dme00061	Fatty acid biosynthesis	1	3.34953e-12	1	6	0	0	290	2584
	dme_M00404	COPII complex	1	3.34953e-12	1	6	0	0	290	2584
	M00285	MCM complex	1	3.34953e-12	1	6	0	0	290	2584
	ko00750	Vitamin B6 metabolism	1	3.34953e-12	1	6	0	0	290	2584
	dme_M00383	ECV complex	1	3.34953e-12	1	6	0	0	290	2584
	dme_M00072	N-glycosylation by oligosaccharyltransferase	1	4.43422e-12	1	7	0	0	290	2584
	M00072	N-glycosylation by oligosaccharyltransferase	1	4.43422e-12	1	7	0	0	290	2584
	M00048	Inosine monophosphate biosynthesis, PRPP + glutamine => IMP	1	4.43422e-12	1	7	0	0	290	2584
	dme_M00048	Inosine monophosphate biosynthesis, PRPP + glutamine => IMP	1	4.43422e-12	1	7	0	0	290	2584
	dme_M00361	Nucleotide sugar biosynthesis, eukaryotes	1	6.16661e-12	1	8	0	0	290	2584
	M00361	Nucleotide sugar biosynthesis, eukaryotes	1	6.16661e-12	1	8	0	0	290	2584
	dme04711	Circadian rhythm - fly	1	6.35209e-12	1	9	0	0	290	2584
	M00406	TREX complex	1	6.35209e-12	1	9	0	0	290	2584
	ko04122	Sulfur relay system	1	6.35209e-12	1	9	0	0	290	2584
	dme02010	ABC transporters	1	6.35209e-12	1	9	0	0	290	2584
	ko02010	ABC transporters	1	6.35209e-12	1	9	0	0	290	2584
	dme04122	Sulfur relay system	1	6.35209e-12	1	9	0	0	290	2584
	dme_M00406	TREX complex	1	6.35209e-12	1	9	0	0	290	2584
	M00387	SCF-FBW7 complex	1	7.38979e-12	1	11	0	0	290	2584
	dme00450	Selenocompound metabolism	1	7.38979e-12	1	11	0	0	290	2584
	dme_M00381	SCF-SKP2 complex	1	7.38979e-12	1	11	0	0	290	2584
	M00130	Inositol phosphate metabolism, PI=> PIP2 => Ins(1,4,5)P3 => Ins(1,3,4,5)P4	1	7.38979e-12	1	11	0	0	290	2584
	M00381	SCF-SKP2 complex	1	7.38979e-12	1	11	0	0	290	2584
	ko00450	Selenocompound metabolism	1	7.38979e-12	1	11	0	0	290	2584
	dme_M00387	SCF-FBW7 complex	1	7.38979e-12	1	11	0	0	290	2584
	dme_M00130	Inositol phosphate metabolism, PI=> PIP2 => Ins(1,4,5)P3 => Ins(1,3,4,5)P4	1	7.38979e-12	1	11	0	0	290	2584
	M00290	Holo-TFIIH complex	1	7.40573e-12	1	10	0	0	290	2584
	dme_M00290	Holo-TFIIH complex	1	7.40573e-12	1	10	0	0	290	2584
	ko00981	Insect hormone biosynthesis	1	1.26307e-11	1	14	0	0	290	2584
	dme00981	Insect hormone biosynthesis	1	1.26307e-11	1	14	0	0	290	2584
	dme_M00295	BRCA1-associated genome surveillance complex (BASC)	1	1.35329e-11	1	16	0	0	290	2584
	M00295	BRCA1-associated genome surveillance complex (BASC)	1	1.35329e-11	1	16	0	0	290	2584
	M00389	APC/C complex	1	1.42676e-11	1	15	0	0	290	2584
	dme_M00389	APC/C complex	1	1.42676e-11	1	15	0	0	290	2584
	dme00512	Mucin type O-Glycan biosynthesis	1	1.42676e-11	1	15	0	0	290	2584
	ko00512	Mucin type O-Glycan biosynthesis	1	1.42676e-11	1	15	0	0	290	2584
	dme00563	Glycosylphosphatidylinositol(GPI)-anchor biosynthesis	1	1.58119e-11	1	19	0	0	290	2584
	ko00563	Glycosylphosphatidylinositol(GPI)-anchor biosynthesis	1	1.58119e-11	1	19	0	0	290	2584
	M00353	Spliceosome, Prp19/CDC5L complex	1	1.64169e-11	1	17	0	0	290	2584
	dme_M00353	Spliceosome, Prp19/CDC5L complex	1	1.64169e-11	1	17	0	0	290	2584
	dme_M00430	Exon junction complex (EJC)	1	1.64169e-11	1	17	0	0	290	2584
	M00430	Exon junction complex (EJC)	1	1.64169e-11	1	17	0	0	290	2584
	ko04140	Regulation of autophagy	1	1.73482e-11	1	18	0	0	290	2584
	dme04140	Regulation of autophagy	1	1.73482e-11	1	18	0	0	290	2584
	dme03440	Homologous recombination	1	1.73641e-11	1	20	0	0	290	2584
	ko03430	Mismatch repair	1	1.73641e-11	1	20	0	0	290	2584
	ko04130	SNARE interactions in vesicular transport	1	1.73641e-11	1	20	0	0	290	2584
	dme03430	Mismatch repair	1	1.73641e-11	1	20	0	0	290	2584
	ko03440	Homologous recombination	1	1.73641e-11	1	20	0	0	290	2584
	dme04130	SNARE interactions in vesicular transport	1	1.73641e-11	1	20	0	0	290	2584
	dme03460	Fanconi anemia pathway	1	2.19573e-11	1	26	0	0	290	2584
	ko03460	Fanconi anemia pathway	1	2.19573e-11	1	26	0	0	290	2584
	dme_M00341	Proteasome, 19S regulatory particle (PA700)	1	2.33227e-11	1	22	0	0	290	2584
	M00341	Proteasome, 19S regulatory particle (PA700)	1	2.33227e-11	1	22	0	0	290	2584
	ko03022	Basal transcription factors	1	2.81124e-11	1	39	0	0	290	2584
	dme03022	Basal transcription factors	1	2.81124e-11	1	39	0	0	290	2584
	ko03420	Nucleotide excision repair	1	2.81124e-11	1	39	0	0	290	2584
	dme03420	Nucleotide excision repair	1	2.81124e-11	1	39	0	0	290	2584
	ko03030	DNA replication	1	3.03125e-11	1	35	0	0	290	2584
	dme03030	DNA replication	1	3.03125e-11	1	35	0	0	290	2584
	dme04068	FoxO signaling pathway	1	3.42046e-11	1	51	0	0	290	2584

## Sheet: Cl7
Significant Kegg terms	TermID	Term	Enrichment	logP	FDR_BH	Genes in Term	Target Genes in Term	Fraction of Targets in Term	Total Target Genes	Total Genes	Entrez Gene IDs	Gene Symbols
FDR_BH p<0.01	ko03030	DNA replication	1.8e-15	-33.9537	4.38e-13	35	28	0.0595745	470	2584	3.45504e+141	RfC38,Fen1,RfC3,CG13690,dpa,Mcm6,Mcm3,RPA2,Mcm5,Chrac-14,DNApol-alpha73,DNA-ligI,DNApol-alpha180,CG12018,DNApol-alpha60,mtSSB,Pole2,DNApol-alpha50,Mcm7,Mcm2,CG2990,CG11164,Gnf1,DNApol-epsilon,DNApol-delta,RpA-70,RfC4,CG8142
	dme03030	DNA replication	1.8e-15	-33.9537	4.38e-13	35	28	0.0595745	470	2584	3.45504e+141	RfC38,Fen1,RfC3,CG13690,dpa,Mcm6,Mcm3,RPA2,Mcm5,Chrac-14,DNApol-alpha73,DNA-ligI,DNApol-alpha180,CG12018,DNApol-alpha60,mtSSB,Pole2,DNApol-alpha50,Mcm7,Mcm2,CG2990,CG11164,Gnf1,DNApol-epsilon,DNApol-delta,RpA-70,RfC4,CG8142
	dme03008	Ribosome biogenesis in eukaryotes	1.79e-10	-22.441	2.19e-08	86	41	0.087234	470	2584	###############################################################################################################################################################################################################################################################	Nmd3,smid,CG11920,CG30349,CG9799,CG7728,CG3071,l(3)72Dn,l(1)G0020,CG13097,CG33158,Rat1,CG5776,l(1)G0045,Fib,CG2972,Mat89Ba,CG12325,CG12050,Ak6,nop5,CG13185,CG9422,CG8368,CG8038,CG4806,CG7246,CG12301,wcd,emb,Bka,hoip,NHP2,l(2)k09022,CG8064,Nop56,CG4866,Nop60B,CG9107,eIF6,Rtc1
	ko03008	Ribosome biogenesis in eukaryotes	1.79e-10	-22.441	2.19e-08	86	41	0.087234	470	2584	###############################################################################################################################################################################################################################################################	Nmd3,smid,CG11920,CG30349,CG9799,CG7728,CG3071,l(3)72Dn,l(1)G0020,CG13097,CG33158,Rat1,CG5776,l(1)G0045,Fib,CG2972,Mat89Ba,CG12325,CG12050,Ak6,nop5,CG13185,CG9422,CG8368,CG8038,CG4806,CG7246,CG12301,wcd,emb,Bka,hoip,NHP2,l(2)k09022,CG8064,Nop56,CG4866,Nop60B,CG9107,eIF6,Rtc1
	ko03430	Mismatch repair	4.84e-07	-14.5408	3.94e-05	20	14	0.0297872	470	2584	3.45503e+69	RfC38,RfC3,spel1,RPA2,Mlh1,Gnf1,DNApol-delta,RpA-70,RfC4,DNA-ligI,CG8142,CG12018,mtSSB,Msh6
	dme03430	Mismatch repair	4.84e-07	-14.5408	3.94e-05	20	14	0.0297872	470	2584	3.45503e+69	RfC38,RfC3,spel1,RPA2,Mlh1,Gnf1,DNApol-delta,RpA-70,RfC4,DNA-ligI,CG8142,CG12018,mtSSB,Msh6
	dme00240	Pyrimidine metabolism	5.41e-06	-12.1265	0.00033027	82	32	0.0680851	470	2584	3.77233e+161	Chrac-14,CG5537,DNApol-alpha73,CG12267,DNApol-alpha180,CG12018,DNApol-alpha60,RnrL,Trxr-1,RpI135,DNApol-alpha50,CG18600,Rpb5,Ts,CTPsyn,dUTPase,DNApol-epsilon,RpI1,RpIII128,pyd3,CG5757,r-l,Pole2,CG17209,CG13773,CG2794,RpII33,CG6951,DNApol-delta,CG8353,r,CG5380
	ko00240	Pyrimidine metabolism	5.41e-06	-12.1265	0.00033027	82	32	0.0680851	470	2584	3.77233e+161	Chrac-14,CG5537,DNApol-alpha73,CG12267,DNApol-alpha180,CG12018,DNApol-alpha60,RnrL,Trxr-1,RpI135,DNApol-alpha50,CG18600,Rpb5,Ts,CTPsyn,dUTPase,DNApol-epsilon,RpI1,RpIII128,pyd3,CG5757,r-l,Pole2,CG17209,CG13773,CG2794,RpII33,CG6951,DNApol-delta,CG8353,r,CG5380
	ko03420	Nucleotide excision repair	1.15e-05	-11.3767	0.00047708	39	19	0.0404255	470	2584	3.45503e+96	RfC38,RfC3,CycH,RPA2,Chrac-14,pic,Xpac,Ercc1,DNA-ligI,CG12018,Cdk7,Pole2,Gnf1,DNApol-epsilon,Xpd,RpA-70,DNApol-delta,RfC4,CG8142
	dme03420	Nucleotide excision repair	1.15e-05	-11.3767	0.00047708	39	19	0.0404255	470	2584	3.45503e+96	RfC38,RfC3,CycH,RPA2,Chrac-14,pic,Xpac,Ercc1,DNA-ligI,CG12018,Cdk7,Pole2,Gnf1,DNApol-epsilon,Xpd,RpA-70,DNApol-delta,RfC4,CG8142
	dme_M00295	BRCA1-associated genome surveillance complex (BASC)	1.17e-05	-11.3532	0.00047708	16	11	0.0234043	470	2584	3.45503e+54	RfC38,RfC3,spel1,Mlh1,Gnf1,RfC4,CG8142,rad50,nbs,tefu,Msh6
	M00295	BRCA1-associated genome surveillance complex (BASC)	1.17e-05	-11.3532	0.00047708	16	11	0.0234043	470	2584	3.45503e+54	RfC38,RfC3,spel1,Mlh1,Gnf1,RfC4,CG8142,rad50,nbs,tefu,Msh6
	dme_M00285	MCM complex	3.53e-05	-10.2524	0.0012295	6	6	0.012766	470	2584	3.90144e+29	Mcm7,Mcm2,dpa,Mcm6,Mcm3,Mcm5
	M00285	MCM complex	3.53e-05	-10.2524	0.0012295	6	6	0.012766	470	2584	3.90144e+29	Mcm7,Mcm2,dpa,Mcm6,Mcm3,Mcm5
	dme_M00427	Nuclear pore complex	6.21e-05	-9.68658	0.0018944	33	16	0.0340426	470	2584	3.18813e+79	CG16892,CG6540,CG8771,Nup75,Nup160,Nup214,Nup62,Nup154,Nup133,Nup153,Nup54,Nup107,lwr,Nup58,Nup50,Nup358
	M00427	Nuclear pore complex	6.21e-05	-9.68658	0.0018944	33	16	0.0340426	470	2584	3.18813e+79	CG16892,CG6540,CG8771,Nup75,Nup160,Nup214,Nup62,Nup154,Nup133,Nup153,Nup54,Nup107,lwr,Nup58,Nup50,Nup358
	M00289	RF-C complex	0.000195631	-8.53928	0.0049268	5	5	0.0106383	470	2584	3.45504e+24	RfC38,RfC4,RfC3,CG8142,Gnf1
	dme_M00289	RF-C complex	0.000195631	-8.53928	0.0049268	5	5	0.0106383	470	2584	3.45504e+24	RfC38,RfC4,RfC3,CG8142,Gnf1
	dme03440	Homologous recombination	0.000222109	-8.41234	0.0049268	20	11	0.0234043	470	2584	4.35774e+54	spn-A,mms4,Top3alpha,RPA2,DNApol-delta,RpA-70,CG12018,rad50,nbs,spn-B,mtSSB
	dme03410	Base excision repair	0.000222109	-8.41234	0.0049268	20	11	0.0234043	470	2584	3.68874e+57	Fen1,Chrac-14,XRCC1,DNApol-epsilon,Rrp1,DNApol-delta,DNA-ligI,Dsp1,CG12018,Pole2,lig3
	ko03410	Base excision repair	0.000222109	-8.41234	0.0049268	20	11	0.0234043	470	2584	3.68874e+57	Fen1,Chrac-14,XRCC1,DNApol-epsilon,Rrp1,DNApol-delta,DNA-ligI,Dsp1,CG12018,Pole2,lig3
FDR_BH p<0.01	ko03440	Homologous recombination	0.000222109	-8.41234	0.0049268	20	11	0.0234043	470	2584	4.35774e+54	spn-A,mms4,Top3alpha,RPA2,DNApol-delta,RpA-70,CG12018,rad50,nbs,spn-B,mtSSB
FDR_BH p<0.05	ko03013	RNA transport	0.000557287	-7.49243	0.011331	139	41	0.087234	470	2584	###############################################################################################################################################################################################################################################################	eIF-2alpha,CG16892,eIF-1A,Nmd3,Gem3,Nup160,Nup154,Fs(2)Ket,csul,Cbp80,Nup153,Nup107,Nup54,JhI-1,Ef1alpha48D,lwr,Nup58,l(1)G0045,eIF4E-3,Nup50,Nup358,CG6540,eIF4AIII,eIF3-S10,CG8771,CG9422,icln,tsu,CG8038,CG2100,eIF3-S9,Nup75,Nup214,Hel25E,Nup62,Nup133,emb,thoc6,mago,RnpS1,Cbp20
	dme03013	RNA transport	0.000557287	-7.49243	0.011331	139	41	0.087234	470	2584	###############################################################################################################################################################################################################################################################	eIF-2alpha,CG16892,eIF-1A,Nmd3,Gem3,Nup160,Nup154,Fs(2)Ket,csul,Cbp80,Nup153,Nup107,Nup54,JhI-1,Ef1alpha48D,lwr,Nup58,l(1)G0045,eIF4E-3,Nup50,Nup358,CG6540,eIF4AIII,eIF3-S10,CG8771,CG9422,icln,tsu,CG8038,CG2100,eIF3-S9,Nup75,Nup214,Hel25E,Nup62,Nup133,emb,thoc6,mago,RnpS1,Cbp20
	M00284	Origin recognition complex	0.000997424	-6.91033	0.017619	6	5	0.0106383	470	2584	3.47944e+24	Orc5,Orc6,Orc4,Orc1,Orc2
	dme_M00284	Origin recognition complex	0.000997424	-6.91033	0.017619	6	5	0.0106383	470	2584	3.47944e+24	Orc5,Orc6,Orc4,Orc1,Orc2
	dme_M00286	GINS complex	0.00108311	-6.82792	0.017619	4	4	0.00851064	470	2584	4.31664e+19	Sld5,Psf1,Psf2,Psf3
	dme_M00261	DNA polymerase alpha / primase complex	0.00108311	-6.82792	0.017619	4	4	0.00851064	470	2584	3.89424e+19	DNApol-alpha50,DNApol-alpha73,DNApol-alpha180,DNApol-alpha60
	M00286	GINS complex	0.00108311	-6.82792	0.017619	4	4	0.00851064	470	2584	4.31664e+19	Sld5,Psf1,Psf2,Psf3
	M00261	DNA polymerase alpha / primase complex	0.00108311	-6.82792	0.017619	4	4	0.00851064	470	2584	3.89424e+19	DNApol-alpha50,DNApol-alpha73,DNApol-alpha180,DNApol-alpha60
	M00391	Exosome, eukaryotes	0.00179575	-6.32233	0.027385	9	6	0.012766	470	2584	3.67664e+29	Rrp42,Mtr3,Rrp4,Dis3,Rrp46,Csl4
	dme_M00391	Exosome, eukaryotes	0.00179575	-6.32233	0.027385	9	6	0.012766	470	2584	3.67664e+29	Rrp42,Mtr3,Rrp4,Dis3,Rrp46,Csl4
	dme00670	One carbon pool by folate	0.00214885	-6.14282	0.030842	12	7	0.0148936	470	2584	3.39864e+34	ade3,CG7560,Ts,CG3011,CG11089,Nmdmc,Dhfr
	ko00670	One carbon pool by folate	0.00214885	-6.14282	0.030842	12	7	0.0148936	470	2584	3.39864e+34	ade3,CG7560,Ts,CG3011,CG11089,Nmdmc,Dhfr
	dme03460	Fanconi anemia pathway	0.00355847	-5.63842	0.048237	26	11	0.0234043	470	2584	3.58953e+56	FANCI,Fancd2,spn-A,mms4,Fancl,Top3alpha,RPA2,Mlh1,RpA-70,Rev1,Ercc1
FDR_BH p<0.05	ko03460	Fanconi anemia pathway	0.00355847	-5.63842	0.048237	26	11	0.0234043	470	2584	3.58953e+56	FANCI,Fancd2,spn-A,mms4,Fancl,Top3alpha,RPA2,Mlh1,RpA-70,Rev1,Ercc1
Significant Kegg terms	M00082	Fatty acid biosynthesis, initiation	0.00463302	-5.37455	0.059498	5	4	0.00851064	470	2584	3.99104e+21	beg,ACC,CG17374,CG3523
Enrichment p<0.01	dme_M00082	Fatty acid biosynthesis, initiation	0.00463302	-5.37455	0.059498	5	4	0.00851064	470	2584	3.99104e+21	beg,ACC,CG17374,CG3523
	ko00981	Insect hormone biosynthesis	0.00665289	-5.0127	0.081165	14	7	0.0148936	470	2584	5.74036e+39	spok,sad,jhamt,nvd,phm,Jheh3,Jheh1
	dme00981	Insect hormone biosynthesis	0.00665289	-5.0127	0.081165	14	7	0.0148936	470	2584	5.74036e+39	spok,sad,jhamt,nvd,phm,Jheh3,Jheh1
	dme00450	Selenocompound metabolism	0.00709719	-4.94806	0.082463	11	6	0.012766	470	2584	4.14334e+29	CG6950,CG15100,SelD,Sps2,Aats-met,Trxr-1
	ko00450	Selenocompound metabolism	0.00709719	-4.94806	0.082463	11	6	0.012766	470	2584	4.14334e+29	CG6950,CG15100,SelD,Sps2,Aats-met,Trxr-1
	dme01210	2-Oxocarboxylic acid metabolism	0.00895931	-4.71506	0.099367	18	8	0.0170213	470	2584	3.22974e+39	CG1673,Acon,Got1,CG6726,l(1)G0156,Got2,CG1640,CG5028
	ko01210	2-Oxocarboxylic acid metabolism	0.00895931	-4.71506	0.099367	18	8	0.0170213	470	2584	3.22974e+39	CG1673,Acon,Got1,CG6726,l(1)G0156,Got2,CG1640,CG5028
	dme00250	Alanine, aspartate and glutamate metabolism	0.00944351	-4.66243	0.10018	29	11	0.0234043	470	2584	4.30924e+56	Ssadh,Got1,CG9674,Gdh,Got2,CG11241,asparagine-synthetase,CG1640,r,Prat,P5CDh1
	ko00250	Alanine, aspartate and glutamate metabolism	0.00944351	-4.66243	0.10018	29	11	0.0234043	470	2584	4.30924e+56	Ssadh,Got1,CG9674,Gdh,Got2,CG11241,asparagine-synthetase,CG1640,r,Prat,P5CDh1
	ko03018	RNA degradation	0.00988711	-4.61652	0.10052	53	17	0.0361702	470	2584	3.43644e+84	me31B,Mtr3,Dis3,Rat1,tst,LSm7,Rrp6,l(2)35Df,Mpp6,Rrp42,Tob,Rrp4,Rcd-1,Rrp46,CG3909,Hsp60,Csl4
Enrichment p<0.01	dme03018	RNA degradation	0.00988711	-4.61652	0.10052	53	17	0.0361702	470	2584	3.43644e+84	me31B,Mtr3,Dis3,Rat1,tst,LSm7,Rrp6,l(2)35Df,Mpp6,Rrp42,Tob,Rrp4,Rcd-1,Rrp46,CG3909,Hsp60,Csl4
	ko00061	Fatty acid biosynthesis	0.0119042	-4.43086	0.11619	6	4	0.00851064	470	2584	3.57614e+21	ACC,beg,CG17374,CG3523
	dme00061	Fatty acid biosynthesis	0.0119042	-4.43086	0.11619	6	4	0.00851064	470	2584	3.99104e+21	beg,ACC,CG17374,CG3523
	M00354	Spliceosome, U4/U6.U5 tri-snRNP	0.0125333	-4.37937	0.11734	30	11	0.0234043	470	2584	4.41734e+54	hoip,Prp8,CG4849,CG6686,CG17266,SmE,LSm7,ytr,SmG,SmD1,SmD2
	dme_M00354	Spliceosome, U4/U6.U5 tri-snRNP	0.0125333	-4.37937	0.11734	30	11	0.0234043	470	2584	4.41734e+54	hoip,Prp8,CG4849,CG6686,CG17266,SmE,LSm7,ytr,SmG,SmD1,SmD2
	dme00970	Aminoacyl-tRNA biosynthesis	0.0129845	-4.344	0.11734	42	14	0.0297872	470	2584	3.67844e+73	Aats-cys,CG15100,Aats-ala-m,Aats-thr,CG5414,Aats-met,CG31739,CG6796,CG7441,Slimp,CG8257,CG33649,Aats-lys,gatA
	ko00970	Aminoacyl-tRNA biosynthesis	0.0129845	-4.344	0.11734	42	14	0.0297872	470	2584	3.67844e+73	Aats-cys,CG15100,Aats-ala-m,Aats-thr,CG5414,Aats-met,CG31739,CG6796,CG7441,Slimp,CG8257,CG33649,Aats-lys,gatA
	dme03020	RNA polymerase	0.0206875	-3.87823	0.16383	28	10	0.0212766	470	2584	4.22014e+49	CG18600,Rpb5,CG13773,RpII33,CG12267,RpI1,CG5380,RpIII128,CG17209,RpI135
	ko03020	RNA polymerase	0.0206875	-3.87823	0.16383	28	10	0.0212766	470	2584	4.22014e+49	CG18600,Rpb5,CG13773,RpII33,CG12267,RpI1,CG5380,RpIII128,CG17209,RpI135
	dme_M00263	DNA polymerase epsilon complex	0.020695	-3.87786	0.16383	4	3	0.00638298	470	2584	3.77233e+16	Chrac-14,Pole2,DNApol-epsilon
	dme_M00390	Exosome, archaea	0.020695	-3.87786	0.16383	4	3	0.00638298	470	2584	367663773134548	Rrp42,Rrp4,Csl4
	M00263	DNA polymerase epsilon complex	0.020695	-3.87786	0.16383	4	3	0.00638298	470	2584	3.77233e+16	Chrac-14,Pole2,DNApol-epsilon
	M00390	Exosome, archaea	0.020695	-3.87786	0.16383	4	3	0.00638298	470	2584	367663773134548	Rrp42,Rrp4,Csl4
	M00359	Aminoacyl-tRNA biosynthesis, eukaryotes	0.0208149	-3.87208	0.16383	36	12	0.0255319	470	2584	3.67844e+61	Aats-cys,CG15100,Aats-ala-m,Aats-thr,CG5414,Aats-met,CG31739,CG6796,CG7441,Slimp,CG8257,Aats-lys
	dme_M00359	Aminoacyl-tRNA biosynthesis, eukaryotes	0.0208149	-3.87208	0.16383	36	12	0.0255319	470	2584	3.67844e+61	Aats-cys,CG15100,Aats-ala-m,Aats-thr,CG5414,Aats-met,CG31739,CG6796,CG7441,Slimp,CG8257,Aats-lys
	M00398	Sm core complex	0.0238179	-3.73732	0.18161	7	4	0.00851064	470	2584	3.26363e+19	SmG,SmE,SmD2,SmD1
	dme_M00398	Sm core complex	0.0238179	-3.73732	0.18161	7	4	0.00851064	470	2584	3.26363e+19	SmG,SmE,SmD2,SmD1
	dme00230	Purine metabolism	0.0250461	-3.68704	0.18519	131	33	0.0702128	470	2584	4.10924e+167	Ada,Mesh1,CG31793,Chrac-14,CG10581,DNApol-alpha73,CG12267,ade3,bur,DNApol-alpha180,CG12018,DNApol-alpha60,RnrL,RpI135,DNApol-alpha50,CG18600,Rpb5,DNApol-epsilon,RpI1,RpIII128,Adk2,CG11089,Ac78C,Prat,Pole2,Adk3,CG17209,CG13773,RpII33,DNApol-delta,PyK,CG5380,CG6767
	ko00230	Purine metabolism	0.0250461	-3.68704	0.18519	131	33	0.0702128	470	2584	4.10924e+167	Ada,Mesh1,CG31793,Chrac-14,CG10581,DNApol-alpha73,CG12267,ade3,bur,DNApol-alpha180,CG12018,DNApol-alpha60,RnrL,RpI135,DNApol-alpha50,CG18600,Rpb5,DNApol-epsilon,RpI1,RpIII128,Adk2,CG11089,Ac78C,Prat,Pole2,Adk3,CG17209,CG13773,RpII33,DNApol-delta,PyK,CG5380,CG6767
	dme01230	Biosynthesis of amino acids	0.0319779	-3.44271	0.22949	64	18	0.0382979	470	2584	4.10274e+89	CG8036,CG30499,Acon,CG6726,l(1)G0156,Ald,CG1640,CG3011,CG1673,CG9674,Got1,Got2,PyK,CG10184,Gapdh1,Sam-S,CG5028,CG6767
	ko01230	Biosynthesis of amino acids	0.0319779	-3.44271	0.22949	64	18	0.0382979	470	2584	4.10274e+89	CG8036,CG30499,Acon,CG6726,l(1)G0156,Ald,CG1640,CG3011,CG1673,CG9674,Got1,Got2,PyK,CG10184,Gapdh1,Sam-S,CG5028,CG6767
	dme_M00182	RNA polymerase I, eukaryotes	0.0505011	-2.98576	0.35207	12	5	0.0106383	470	2584	4.22014e+24	CG18600,RpI1,Rpb5,CG13773,RpI135
	M00182	RNA polymerase I, eukaryotes	0.0505011	-2.98576	0.35207	12	5	0.0106383	470	2584	4.22014e+24	CG18600,RpI1,Rpb5,CG13773,RpI135
	M00158	F-type ATPase, eukaryotes	0.0545652	-2.90836	0.36983	16	6	0.012766	470	2584	3.76174e+29	blw,ATPsyn-d,ATPsyn-b,ATPsyn-Cf6,l(2)06225,ATPsyn-beta
	dme_M00158	F-type ATPase, eukaryotes	0.0545652	-2.90836	0.36983	16	6	0.012766	470	2584	3.76174e+29	blw,ATPsyn-d,ATPsyn-b,ATPsyn-Cf6,l(2)06225,ATPsyn-beta
	dme_M00034	Methionine salvage pathway	0.0632796	-2.76019	0.40632	9	4	0.00851064	470	2584	4.06304e+19	CG12173,CG11334,Sam-S,SpdS
	M00351	Spliceosome, U1-snRNP	0.0632796	-2.76019	0.40632	9	4	0.00851064	470	2584	3.26363e+19	SmG,SmE,SmD2,SmD1
	M00034	Methionine salvage pathway	0.0632796	-2.76019	0.40632	9	4	0.00851064	470	2584	4.06304e+19	CG12173,CG11334,Sam-S,SpdS
	dme_M00351	Spliceosome, U1-snRNP	0.0632796	-2.76019	0.40632	9	4	0.00851064	470	2584	3.26363e+19	SmG,SmE,SmD2,SmD1
	ko03015	mRNA surveillance pathway	0.0712973	-2.6409	0.44279	70	18	0.0382979	470	2584	4.09874e+89	eIF4AIII,flw,Cpsf160,tsu,Cpsf73,Pp1alpha-96A,Hel25E,Pp1-87B,Cbp80,CstF-50,mago,tws,CG7185,PP2A-B',RnpS1,Sym,Elf,Cbp20
	dme03015	mRNA surveillance pathway	0.0712973	-2.6409	0.44279	70	18	0.0382979	470	2584	4.09874e+89	eIF4AIII,flw,Cpsf160,tsu,Cpsf73,Pp1alpha-96A,Hel25E,Pp1-87B,Cbp80,CstF-50,mago,tws,CG7185,PP2A-B',RnpS1,Sym,Elf,Cbp20
	ko03450	Non-homologous end-joining	0.0776719	-2.55526	0.44279	6	3	0.00638298	470	2584	368873493037564	Fen1,Ku80,rad50
	dme03450	Non-homologous end-joining	0.0776719	-2.55526	0.44279	6	3	0.00638298	470	2584	368873493037564	Fen1,Ku80,rad50
	ko01200	Carbon metabolism	0.0845133	-2.47085	0.44279	105	25	0.0531915	470	2584	4.10274e+124	CG8036,CG30499,Men-b,Acon,CG15093,l(1)G0156,Ald,Pgi,CG1640,CG3011,Scsalpha,CG10219,CG4390,SdhB,SdhA,Got1,Got2,Men,PyK,CG10932,Gapdh1,CG7560,CG7430,CG5028,CG6767
	dme01200	Carbon metabolism	0.0845133	-2.47085	0.44279	105	25	0.0531915	470	2584	4.10274e+124	CG8036,CG30499,Men-b,Acon,CG15093,l(1)G0156,Ald,Pgi,CG1640,CG3011,Scsalpha,CG10219,CG4390,SdhB,SdhA,Got1,Got2,Men,PyK,CG10932,Gapdh1,CG7560,CG7430,CG5028,CG6767
	dme_M00288	RPA complex	0.0871053	-2.44064	0.44279	3	2	0.00425532	470	2584	4097235364	RpA-70,RPA2
	M00288	RPA complex	0.0871053	-2.44064	0.44279	3	2	0.00425532	470	2584	4097235364	RpA-70,RPA2
	M00141	C1-unit interconversion, eukaryotes	0.0871053	-2.44064	0.44279	3	2	0.00425532	470	2584	3152447895	CG3011,Nmdmc
	M00399	Cap binding complex	0.0871053	-2.44064	0.44279	3	2	0.00425532	470	2584	4216644409	Cbp20,Cbp80
	M00291	MRN complex	0.0871053	-2.44064	0.44279	3	2	0.00425532	470	2584	4425937564	nbs,rad50
	dme00730	Thiamine metabolism	0.0871053	-2.44064	0.44279	3	2	0.00425532	470	2584	3461340326	CG12264,CG10581
	dme_M00399	Cap binding complex	0.0871053	-2.44064	0.44279	3	2	0.00425532	470	2584	4216644409	Cbp20,Cbp80
	ko00730	Thiamine metabolism	0.0871053	-2.44064	0.44279	3	2	0.00425532	470	2584	3461340326	CG12264,CG10581
	M00392	Ski complex	0.0871053	-2.44064	0.44279	3	2	0.00425532	470	2584	4122642813	CG3909,tst
	M00051	Uridine monophosphate biosynthesis, glutamine (+ PRPP) => UMP	0.0871053	-2.44064	0.44279	3	2	0.00425532	470	2584	3264042493	r,r-l
	dme_M00141	C1-unit interconversion, eukaryotes	0.0871053	-2.44064	0.44279	3	2	0.00425532	470	2584	3152447895	CG3011,Nmdmc
	dme_M00291	MRN complex	0.0871053	-2.44064	0.44279	3	2	0.00425532	470	2584	4425937564	nbs,rad50
	dme_M00392	Ski complex	0.0871053	-2.44064	0.44279	3	2	0.00425532	470	2584	4122642813	CG3909,tst
	dme_M00051	Uridine monophosphate biosynthesis, glutamine (+ PRPP) => UMP	0.0871053	-2.44064	0.44279	3	2	0.00425532	470	2584	3264042493	r,r-l
	dme00190	Oxidative phosphorylation	0.0955199	-2.34842	0.47565	126	29	0.0617021	470	2584	3.11903e+144	CG3621,CG9172,Vha44,ATPsyn-d,CG12859,CG31648,CG4169,CG3803,Vha68-2,CG8102,CG10219,ATPsyn-beta,blw,CG18624,CG7580,SdhB,VhaAC45,CG9065,SdhA,ATPsyn-Cf6,CG9140,l(3)neo18,l(2)06225,CoVa,mtacp1,ND75,ATPsyn-b,ND42,VhaAC39-1
	ko00190	Oxidative phosphorylation	0.0955199	-2.34842	0.47565	126	29	0.0617021	470	2584	3.25653e+144	CG9172,CG3621,Vha44,ATPsyn-d,CG12859,CG31648,CG4169,CG3803,Vha68-2,CG8102,CG10219,ATPsyn-beta,blw,CG18624,CG7580,SdhB,SdhA,VhaAC45,CG9065,ATPsyn-Cf6,CG9140,l(3)neo18,CoVa,l(2)06225,mtacp1,ND75,ATPsyn-b,ND42,VhaAC39-1
	ko00030	Pentose phosphate pathway	0.108129	-2.22443	0.52767	23	7	0.0148936	470	2584	4.10274e+34	CG8036,Pgi,CG30499,CG13369,CG15093,Ald,CG6767
	dme00030	Pentose phosphate pathway	0.108129	-2.22443	0.52767	23	7	0.0148936	470	2584	3.58864e+34	Pgi,CG8036,CG30499,CG13369,CG15093,Ald,CG6767
	M00352	Spliceosome, U2-snRNP	0.114673	-2.16567	0.54353	19	6	0.012766	470	2584	3.80934e+29	CG13900,U2A,SmG,SmE,SmD2,SmD1
	dme_M00352	Spliceosome, U2-snRNP	0.114673	-2.16567	0.54353	19	6	0.012766	470	2584	3.80934e+29	CG13900,U2A,SmG,SmE,SmD2,SmD1
	dme_M00148	Succinate dehydrogenase (ubiquinone)	0.118062	-2.13654	0.54353	7	3	0.00638298	470	2584	355903722842808	SdhB,SdhA,CG10219
	M00048	Inosine monophosphate biosynthesis, PRPP + glutamine => IMP	0.118062	-2.13654	0.54353	7	3	0.00638298	470	2584	339864297340935	ade3,CG11089,Prat
	dme_M00048	Inosine monophosphate biosynthesis, PRPP + glutamine => IMP	0.118062	-2.13654	0.54353	7	3	0.00638298	470	2584	339864297340935	ade3,CG11089,Prat
	M00148	Succinate dehydrogenase (ubiquinone)	0.118062	-2.13654	0.54353	7	3	0.00638298	470	2584	355903722842808	SdhB,SdhA,CG10219
	M00004	Pentose phosphate pathway (Pentose phosphate cycle)	0.122949	-2.09598	0.54545	11	4	0.00851064	470	2584	3.58864e+19	Pgi,CG8036,CG30499,CG15093
	M00036	Leucine degradation, leucine => acetoacetate + acetyl-CoA	0.122949	-2.09598	0.54545	11	4	0.00851064	470	2584	3.22974e+19	CG1673,CG6638,CG7430,CG8199
	dme_M00036	Leucine degradation, leucine => acetoacetate + acetyl-CoA	0.122949	-2.09598	0.54545	11	4	0.00851064	470	2584	3.22974e+19	CG1673,CG6638,CG7430,CG8199
	dme_M00004	Pentose phosphate pathway (Pentose phosphate cycle)	0.122949	-2.09598	0.54545	11	4	0.00851064	470	2584	3.58864e+19	Pgi,CG8036,CG30499,CG15093
	M00181	RNA polymerase III, eukaryotes	0.150035	-1.89688	0.63488	16	5	0.0106383	470	2584	4.15424e+24	CG12267,Rpb5,CG5380,RpIII128,CG17209
	dme_M00181	RNA polymerase III, eukaryotes	0.150035	-1.89688	0.63488	16	5	0.0106383	470	2584	4.15424e+24	CG12267,Rpb5,CG5380,RpIII128,CG17209
	dme00400	Phenylalanine, tyrosine and tryptophan biosynthesis	0.153516	-1.87395	0.63488	4	2	0.00425532	470	2584	3678233373	Got1,Got2
	M00083	Fatty acid biosynthesis, elongation	0.153516	-1.87395	0.63488	4	2	0.00425532	470	2584	335511133524	CG17374,CG3523
	dme_M00425	H/ACA ribonucleoprotein complex	0.153516	-1.87395	0.63488	4	2	0.00425532	470	2584	4400537873	NHP2,Nop60B
	dme_M00083	Fatty acid biosynthesis, elongation	0.153516	-1.87395	0.63488	4	2	0.00425532	470	2584	335511133524	CG17374,CG3523
	ko00400	Phenylalanine, tyrosine and tryptophan biosynthesis	0.153516	-1.87395	0.63488	4	2	0.00425532	470	2584	3678233373	Got1,Got2
	M00425	H/ACA ribonucleoprotein complex	0.153516	-1.87395	0.63488	4	2	0.00425532	470	2584	4400537873	NHP2,Nop60B
	dme00270	Cysteine and methionine metabolism	0.179581	-1.71713	0.71338	26	7	0.0148936	470	2584	4.06304e+34	CG12173,CG11334,Got1,Sam-S,SpdS,Ahcy13,Got2
	ko00270	Cysteine and methionine metabolism	0.179581	-1.71713	0.71338	26	7	0.0148936	470	2584	4.06304e+34	CG12173,CG11334,Got1,Sam-S,SpdS,Ahcy13,Got2
	M00005	PRPP biosynthesis, ribose 5P => PRPP	0.181889	-1.70436	0.71338	1	1	0.00212766	470	2584	39132	CG6767
	dme_M00005	PRPP biosynthesis, ribose 5P => PRPP	0.181889	-1.70436	0.71338	1	1	0.00212766	470	2584	39132	CG6767
	dme_M00430	Exon junction complex (EJC)	0.182612	-1.70039	0.71338	17	5	0.0106383	470	2584	4.11474e+24	RnpS1,mago,eIF4AIII,Hel25E,tsu
	M00430	Exon junction complex (EJC)	0.182612	-1.70039	0.71338	17	5	0.0106383	470	2584	4.11474e+24	RnpS1,mago,eIF4AIII,Hel25E,tsu
	dme00620	Pyruvate metabolism	0.184193	-1.69177	0.71338	50	12	0.0255319	470	2584	3.42564e+59	Aldh,Men-b,CG9436,CG10970,CG10863,Men,PyK,CG14022,ACC,CG10932,CG7430,Pepck
	ko00620	Pyruvate metabolism	0.184193	-1.69177	0.71338	50	12	0.0255319	470	2584	3.42564e+59	Aldh,Men-b,CG9436,CG10970,CG10863,Men,PyK,CG14022,ACC,CG10932,CG7430,Pepck
	dme00280	Valine, leucine and isoleucine degradation	0.188021	-1.6712	0.71683	31	8	0.0170213	470	2584	3.42563e+40	Aldh,CG1673,CG6638,CG10932,CG4747,CG7430,CG15093,CG8199
	ko00280	Valine, leucine and isoleucine degradation	0.188021	-1.6712	0.71683	31	8	0.0170213	470	2584	3.42563e+40	Aldh,CG1673,CG6638,CG10932,CG4747,CG7430,CG15093,CG8199
	ko04122	Sulfur relay system	0.214903	-1.53757	0.80407	9	3	0.00638298	470	2584	392383418734613	Mocs1,CG13090,CG12264
	dme04122	Sulfur relay system	0.214903	-1.53757	0.80407	9	3	0.00638298	470	2584	392383418734613	Mocs1,CG13090,CG12264
	dme00900	Terpenoid backbone biosynthesis	0.217495	-1.52558	0.80407	18	5	0.0106383	470	2584	3.16954e+24	CG10932,CG10585,CG10268,ste24a,ste14
	ko00900	Terpenoid backbone biosynthesis	0.217495	-1.52558	0.80407	18	5	0.0106383	470	2584	3.16954e+24	CG10932,CG10585,CG10268,ste24a,ste14
	dme_M00007	Pentose phosphate pathway, non-oxidative phase, fructose 6P => ribose 5P	0.226001	-1.48722	0.82305	5	2	0.00425532	470	2584	4102735692	CG8036,CG30499
	M00007	Pentose phosphate pathway, non-oxidative phase, fructose 6P => ribose 5P	0.226001	-1.48722	0.82305	5	2	0.00425532	470	2584	4102735692	CG8036,CG30499
	dme_M00143	NADH dehydrogenase (ubiquinone) Fe-S protein/flavoprotein complex, mitochondria	0.240815	-1.42373	0.8641	14	4	0.00851064	470	2584	3.17623e+19	ND75,CG9172,CG9140,CG8102
	M00143	NADH dehydrogenase (ubiquinone) Fe-S protein/flavoprotein complex, mitochondria	0.240815	-1.42373	0.8641	14	4	0.00851064	470	2584	3.17623e+19	ND75,CG9172,CG9140,CG8102
	dme00360	Phenylalanine metabolism	0.268099	-1.3164	0.93452	10	3	0.00638298	470	2584	334933678233373	Prx6005,Got1,Got2
	ko00360	Phenylalanine metabolism	0.268099	-1.3164	0.93452	10	3	0.00638298	470	2584	334933678233373	Prx6005,Got1,Got2
	M00290	Holo-TFIIH complex	0.268099	-1.3164	0.93452	10	3	0.00638298	470	2584	374144042931441	Xpd,CycH,Cdk7
	dme_M00290	Holo-TFIIH complex	0.268099	-1.3164	0.93452	10	3	0.00638298	470	2584	374144042931441	Xpd,CycH,Cdk7
	M00009	Citrate cycle (TCA cycle, Krebs cycle)	0.2967	-1.21503	1	35	8	0.0170213	470	2584	3.55904e+39	SdhB,Acon,SdhA,l(1)G0156,CG7430,Scsalpha,CG5028,CG10219
	dme_M00009	Citrate cycle (TCA cycle, Krebs cycle)	0.2967	-1.21503	1	35	8	0.0170213	470	2584	3.55904e+39	SdhB,Acon,SdhA,l(1)G0156,CG7430,Scsalpha,CG5028,CG10219
	dme04512	ECM-receptor interaction	0.322531	-1.13156	1	11	3	0.00638298	470	2584	337263372739529	vkg,Cg25C,Hml
	ko04512	ECM-receptor interaction	0.322531	-1.13156	1	11	3	0.00638298	470	2584	337263372739529	vkg,Cg25C,Hml
	dme00310	Lysine degradation	0.328651	-1.11276	1	31	7	0.0148936	470	2584	3.42563e+34	Aldh,CG10932,Mes-4,Su(var)3-9,egg,pr-set7,CG9547
	ko00310	Lysine degradation	0.328651	-1.11276	1	31	7	0.0148936	470	2584	3.42563e+34	Aldh,CG10932,Mes-4,Su(var)3-9,egg,pr-set7,CG9547
	ko00290	Valine, leucine and isoleucine biosynthesis	0.330751	-1.10639	1	2	1	0.00212766	470	2584	32297	CG1673
	M00293	DNA polymerase zeta complex	0.330751	-1.10639	1	2	1	0.00212766	470	2584	40677	rev7
	dme00290	Valine, leucine and isoleucine biosynthesis	0.330751	-1.10639	1	2	1	0.00212766	470	2584	32297	CG1673
	dme_M00294	DNA polymerase gamma complex	0.330751	-1.10639	1	2	1	0.00212766	470	2584	34792	tam
	M00554	Nucleotide sugar biosynthesis, galactose => UDP-galactose	0.330751	-1.10639	1	2	1	0.00212766	470	2584	33935	Galt
	dme_M00293	DNA polymerase zeta complex	0.330751	-1.10639	1	2	1	0.00212766	470	2584	40677	rev7
	dme_M00554	Nucleotide sugar biosynthesis, galactose => UDP-galactose	0.330751	-1.10639	1	2	1	0.00212766	470	2584	33935	Galt
	M00294	DNA polymerase gamma complex	0.330751	-1.10639	1	2	1	0.00212766	470	2584	34792	tam
	dme03040	Spliceosome	0.330765	-1.10635	1	125	25	0.0531915	470	2584	3.22824e+124	CG1622,eIF4AIII,LSm7,tsu,x16,U2A,Hel25E,Cbp80,CG11107,SmD1,CG13900,hoip,U2af38,Prp19,Prp8,mago,CG4849,CG6686,CG17266,SmE,ytr,Cbp20,CG3542,SmG,SmD2
	ko03040	Spliceosome	0.330765	-1.10635	1	125	25	0.0531915	470	2584	3.22824e+124	CG1622,eIF4AIII,LSm7,tsu,x16,U2A,Hel25E,Cbp80,CG11107,SmD1,CG13900,hoip,U2af38,Prp19,Prp8,mago,CG4849,CG6686,CG17266,SmE,ytr,Cbp20,CG3542,SmG,SmD2
	dme00330	Arginine and proline metabolism	0.3661	-1.00485	1	53	11	0.0234043	470	2584	3.42564e+54	Aldh,Got1,CG17337,CG4546,CG6726,Gdh,Got2,slgA,Oat,SpdS,P5CDh1
	ko00330	Arginine and proline metabolism	0.3661	-1.00485	1	53	11	0.0234043	470	2584	3.42564e+54	Aldh,Got1,CG17337,CG4546,CG6726,Gdh,Got2,slgA,Oat,SpdS,P5CDh1
	dme00072	Synthesis and degradation of ketone bodies	0.373006	-0.986161	1	7	2	0.00425532	470	2584	3169543512	CG10932,sro
	ko00072	Synthesis and degradation of ketone bodies	0.373006	-0.986161	1	7	2	0.00425532	470	2584	3169543512	CG10932,sro
	ko00650	Butanoate metabolism	0.374767	-0.98145	1	17	4	0.00851064	470	2584	3.16954e+19	CG10932,Ssadh,sro,CG10639
	dme00650	Butanoate metabolism	0.374767	-0.98145	1	17	4	0.00851064	470	2584	3.16954e+19	CG10932,Ssadh,sro,CG10639
	M00010	Citrate cycle, first carbon oxidation, oxaloacetate => 2-oxoglutarate	0.376983	-0.975555	1	12	3	0.00638298	470	2584	441494310232940	Acon,CG5028,l(1)G0156
	dme_M00010	Citrate cycle, first carbon oxidation, oxaloacetate => 2-oxoglutarate	0.376983	-0.975555	1	12	3	0.00638298	470	2584	441494310232940	Acon,CG5028,l(1)G0156
	ko00020	Citrate cycle (TCA cycle)	0.378933	-0.970395	1	43	9	0.0191489	470	2584	3.55904e+44	SdhB,SdhA,Acon,l(1)G0156,Pepck,CG7430,CG5028,Scsalpha,CG10219
	dme00020	Citrate cycle (TCA cycle)	0.378933	-0.970395	1	43	9	0.0191489	470	2584	3.55904e+44	SdhB,Acon,SdhA,l(1)G0156,CG7430,Pepck,CG5028,Scsalpha,CG10219
	ko00260	Glycine, serine and threonine metabolism	0.401378	-0.912852	1	28	6	0.012766	470	2584	3.93334e+29	CG10361,CG11241,CG10184,CG6188,CG3011,CG7430
	dme00260	Glycine, serine and threonine metabolism	0.401378	-0.912852	1	28	6	0.012766	470	2584	3.93334e+29	CG10361,CG11241,CG10184,CG6188,CG3011,CG7430
	M00011	Citrate cycle, second carbon oxidation, 2-oxoglutarate => oxaloacetate	0.410094	-0.891369	1	23	5	0.0106383	470	2584	3.55904e+24	SdhB,SdhA,CG7430,Scsalpha,CG10219
	dme_M00011	Citrate cycle, second carbon oxidation, 2-oxoglutarate => oxaloacetate	0.410094	-0.891369	1	23	5	0.0106383	470	2584	3.55904e+24	SdhB,SdhA,CG7430,Scsalpha,CG10219
	dme00410	beta-Alanine metabolism	0.419702	-0.86821	1	18	4	0.00851064	470	2584	4.09163e+19	pyd3,Aldh,CG17337,SpdS
	ko00410	beta-Alanine metabolism	0.419702	-0.86821	1	18	4	0.00851064	470	2584	4.09163e+19	pyd3,Aldh,CG17337,SpdS
	dme_M00147	NADH dehydrogenase (ubiquinone) 1 beta subcomplex	0.430462	-0.842897	1	13	3	0.00638298	470	2584	316973664046260	CG18624,CG12859,l(3)neo18
	M00147	NADH dehydrogenase (ubiquinone) 1 beta subcomplex	0.430462	-0.842897	1	13	3	0.00638298	470	2584	316973664046260	CG18624,CG12859,l(3)neo18
	ko00040	Pentose and glucuronate interconversions	0.43552	-0.831214	1	45	9	0.0191489	470	2584	3.42564e+44	Aldh,CG30499,CG3609,Ugt36Ba,CG9436,CG10863,Ugt35a,Sodh-2,CG4302
	dme00040	Pentose and glucuronate interconversions	0.43552	-0.831214	1	45	9	0.0191489	470	2584	3.42564e+44	Aldh,CG30499,Ugt36Ba,CG3609,CG9436,Ugt35a,CG10863,Sodh-2,CG4302
	M00095	C5 isoprenoid biosynthesis, mevalonate pathway	0.442554	-0.815193	1	8	2	0.00425532	470	2584	3169535255	CG10932,CG10268
	dme00340	Histidine metabolism	0.442554	-0.815193	1	8	2	0.00425532	470	2584	3425635507	Aldh,CG17337
	M00632	Galactose degradation, Leloir pathway, galactose => alpha-D-glucose-1P	0.442554	-0.815193	1	8	2	0.00425532	470	2584	3869733935	CG10467,Galt
	dme_M00632	Galactose degradation, Leloir pathway, galactose => alpha-D-glucose-1P	0.442554	-0.815193	1	8	2	0.00425532	470	2584	3869733935	CG10467,Galt
	ko00340	Histidine metabolism	0.442554	-0.815193	1	8	2	0.00425532	470	2584	3425635507	Aldh,CG17337
	dme_M00095	C5 isoprenoid biosynthesis, mevalonate pathway	0.442554	-0.815193	1	8	2	0.00425532	470	2584	3169535255	CG10932,CG10268
	dme04068	FoxO signaling pathway	0.45248	-0.793012	1	51	10	0.0212766	470	2584	3.76184e+49	CycB,Sod2,Pi3K92E,ird5,cdc2c,Art1,polo,tefu,p38b,Pepck
	ko00785	Lipoic acid metabolism	0.452574	-0.792803	1	3	1	0.00212766	470	2584	40259	Las
	dme00785	Lipoic acid metabolism	0.452574	-0.792803	1	3	1	0.00212766	470	2584	40259	Las
	M00046	Pyrimidine degradation, uracil => beta-alanine, thymine => 3-aminoisobutanoate	0.452574	-0.792803	1	3	1	0.00212766	470	2584	40916	pyd3
	dme_M00046	Pyrimidine degradation, uracil => beta-alanine, thymine => 3-aminoisobutanoate	0.452574	-0.792803	1	3	1	0.00212766	470	2584	40916	pyd3
	dme00471	D-Glutamine and D-glutamate metabolism	0.452574	-0.792803	1	3	1	0.00212766	470	2584	42832	Gdh
	ko00460	Cyanoamino acid metabolism	0.452574	-0.792803	1	3	1	0.00212766	470	2584	31524	CG3011
	ko00471	D-Glutamine and D-glutamate metabolism	0.452574	-0.792803	1	3	1	0.00212766	470	2584	42832	Gdh
	dme00460	Cyanoamino acid metabolism	0.452574	-0.792803	1	3	1	0.00212766	470	2584	31524	CG3011
	dme00980	Metabolism of xenobiotics by cytochrome P450	0.457012	-0.783046	1	62	12	0.0255319	470	2584	3.71065e+59	GstE1,Ugt36Ba,CG3609,GstE2,gfzf,GstE6,Ugt35a,GstE7,GstD10,GstE8,GstE5,CG4302
	ko00980	Metabolism of xenobiotics by cytochrome P450	0.457012	-0.783046	1	62	12	0.0255319	470	2584	3.71065e+59	GstE1,Ugt36Ba,CG3609,GstE2,gfzf,GstE6,Ugt35a,GstE7,GstD10,GstE8,GstE5,CG4302
	dme_M00154	Cytochrome c oxidase	0.463832	-0.768233	1	19	4	0.00851064	470	2584	3.24393e+19	CG9065,CG31648,CoVa,CG3803
	M00154	Cytochrome c oxidase	0.463832	-0.768233	1	19	4	0.00851064	470	2584	3.24393e+19	CG9065,CG31648,CoVa,CG3803
	ko00380	Tryptophan metabolism	0.463832	-0.768233	1	19	4	0.00851064	470	2584	4.14333e+19	CG6950,Aldh,CG10932,CG9547
	dme00380	Tryptophan metabolism	0.463832	-0.768233	1	19	4	0.00851064	470	2584	4.14333e+19	CG6950,Aldh,CG10932,CG9547
	dme00480	Glutathione metabolism	0.481143	-0.73159	1	63	12	0.0255319	470	2584	3.71064e+60	GstE1,GstE2,Gclm,gfzf,GstE6,CG15093,GstE7,GstD10,GstE8,RnrL,GstE5,SpdS
	ko00480	Glutathione metabolism	0.481143	-0.73159	1	63	12	0.0255319	470	2584	3.71064e+60	GstE1,GstE2,Gclm,gfzf,GstE6,CG15093,GstE7,GstD10,GstE8,RnrL,GstE5,SpdS
	dme_M00003	Gluconeogenesis, oxaloacetate => fructose-6P	0.482184	-0.72943	1	14	3	0.00638298	470	2584	357283713143183	Gapdh1,Pepck,Ald
	dme_M00146	NADH dehydrogenase (ubiquinone) 1 alpha subcomplex	0.482184	-0.72943	1	14	3	0.00638298	470	2584	381543119042591	mtacp1,CG3621,ND42
	M00003	Gluconeogenesis, oxaloacetate => fructose-6P	0.482184	-0.72943	1	14	3	0.00638298	470	2584	357283713143183	Gapdh1,Pepck,Ald
	M00146	NADH dehydrogenase (ubiquinone) 1 alpha subcomplex	0.482184	-0.72943	1	14	3	0.00638298	470	2584	381543119042591	mtacp1,CG3621,ND42
	ko00830	Retinol metabolism	0.506015	-0.681189	1	31	6	0.012766	470	2584	4.48875e+29	mdy,Ugt36Ba,Ugt35a,CG9265,CG4302,CG10672
	dme00830	Retinol metabolism	0.506015	-0.681189	1	31	6	0.012766	470	2584	4.48875e+29	mdy,Ugt36Ba,Ugt35a,CG9265,CG4302,CG10672
	dme00640	Propanoate metabolism	0.506715	-0.679806	1	20	4	0.00851064	470	2584	3.42563e+19	Aldh,CG10932,ACC,Scsalpha
	ko00640	Propanoate metabolism	0.506715	-0.679806	1	20	4	0.00851064	470	2584	3.42563e+19	Aldh,CG10932,ACC,Scsalpha
	dme04711	Circadian rhythm - fly	0.507597	-0.678067	1	9	2	0.00425532	470	2584	3357145588	tim,Pdp1
	M00406	TREX complex	0.507597	-0.678067	1	9	2	0.00425532	470	2584	3939433781	thoc6,Hel25E
	dme02010	ABC transporters	0.507597	-0.678067	1	9	2	0.00425532	470	2584	4192533103	Hmt-1,CG1718
	ko02010	ABC transporters	0.507597	-0.678067	1	9	2	0.00425532	470	2584	4192533103	Hmt-1,CG1718
	dme_M00406	TREX complex	0.507597	-0.678067	1	9	2	0.00425532	470	2584	3939433781	thoc6,Hel25E
	M00049	Adenine ribonucleotide biosynthesis, IMP => ADP,ATP	0.531561	-0.631938	1	15	3	0.00638298	470	2584	426204131837834	PyK,Adk3,Adk2
	dme_M00049	Adenine ribonucleotide biosynthesis, IMP => ADP,ATP	0.531561	-0.631938	1	15	3	0.00638298	470	2584	426204131837834	PyK,Adk3,Adk2
	M00426	Survival motor neuron (SMN) complex	0.55226	-0.593736	1	4	1	0.00212766	470	2584	39195	Gem3
	M00027	GABA (gamma-Aminobutyrate) shunt	0.55226	-0.593736	1	4	1	0.00212766	470	2584	43092	Ssadh
	dme00601	Glycosphingolipid biosynthesis - lacto and neolacto series	0.55226	-0.593736	1	4	1	0.00212766	470	2584	36279	CG33145
	dme_M00057	Glycosaminoglycan biosynthesis, linkage tetrasaccharide	0.55226	-0.593736	1	4	1	0.00212766	470	2584	38288	oxt
	M00057	Glycosaminoglycan biosynthesis, linkage tetrasaccharide	0.55226	-0.593736	1	4	1	0.00212766	470	2584	38288	oxt
	dme_M00118	Glutathione biosynthesis, glutamate => glutathione	0.55226	-0.593736	1	4	1	0.00212766	470	2584	248194	Gclm
	ko00601	Glycosphingolipid biosynthesis - lacto and neolacto series	0.55226	-0.593736	1	4	1	0.00212766	470	2584	36279	CG33145
	M00118	Glutathione biosynthesis, glutamate => glutathione	0.55226	-0.593736	1	4	1	0.00212766	470	2584	248194	Gclm
	dme_M00426	Survival motor neuron (SMN) complex	0.55226	-0.593736	1	4	1	0.00212766	470	2584	39195	Gem3
	dme_M00027	GABA (gamma-Aminobutyrate) shunt	0.55226	-0.593736	1	4	1	0.00212766	470	2584	43092	Ssadh
	dme00770	Pantothenate and CoA biosynthesis	0.567472	-0.566565	1	10	2	0.00425532	470	2584	4091632297	pyd3,CG1673
	ko00770	Pantothenate and CoA biosynthesis	0.567472	-0.566565	1	10	2	0.00425532	470	2584	4091632297	pyd3,CG1673
	ko00982	Drug metabolism - cytochrome P450	0.589604	-0.528305	1	62	11	0.0234043	470	2584	3.71065e+54	GstE1,Ugt36Ba,GstE2,gfzf,GstE6,Ugt35a,GstE7,GstD10,GstE8,GstE5,CG4302
	dme00982	Drug metabolism - cytochrome P450	0.589604	-0.528305	1	62	11	0.0234043	470	2584	3.71065e+54	GstE1,Ugt36Ba,GstE2,gfzf,GstE6,Ugt35a,GstE7,GstD10,GstE8,GstE5,CG4302
	dme00051	Fructose and mannose metabolism	0.595692	-0.518031	1	28	5	0.0106383	470	2584	3.55864e+24	CG9436,CG10863,Ald,Sodh-2,Pfrx
	ko00051	Fructose and mannose metabolism	0.595692	-0.518031	1	28	5	0.0106383	470	2584	3.55864e+24	CG9436,CG10863,Ald,Pfrx,Sodh-2
	ko00010	Glycolysis / Gluconeogenesis	0.59828	-0.513697	1	51	9	0.0191489	470	2584	3.42563e+44	Aldh,CG9008,CG10467,Ald,Pgi,PyK,Gapdh1,CG7430,Pepck
	dme00010	Glycolysis / Gluconeogenesis	0.59828	-0.513697	1	51	9	0.0191489	470	2584	3.42563e+44	Aldh,CG9008,CG10467,Ald,Pgi,PyK,Gapdh1,CG7430,Pepck
	M00355	Spliceosome, 35S U5-snRNP	0.61036	-0.493706	1	40	7	0.0148936	470	2584	3.71234e+34	Prp19,Prp8,CG4849,SmG,SmE,SmD2,SmD1
	dme_M00355	Spliceosome, 35S U5-snRNP	0.61036	-0.493706	1	40	7	0.0148936	470	2584	3.71234e+34	Prp19,Prp8,CG4849,SmG,SmE,SmD2,SmD1
	dme00910	Nitrogen metabolism	0.621766	-0.475192	1	17	3	0.00638298	470	2584	318043987842832	CG11284,CG9674,Gdh
	ko00910	Nitrogen metabolism	0.621766	-0.475192	1	17	3	0.00638298	470	2584	318043987842832	CG11284,CG9674,Gdh
	M00307	Pyruvate oxidation, pyruvate => acetyl-CoA	0.633825	-0.455982	1	5	1	0.00212766	470	2584	39988	CG7430
	M00094	Ceramide biosynthesis	0.633825	-0.455982	1	5	1	0.00212766	470	2584	33836	ifc
	M00405	THC complex	0.633825	-0.455982	1	5	1	0.00212766	470	2584	39394	thoc6
	M00006	Pentose phosphate pathway, oxidative phase, glucose 6P => ribulose 5P	0.633825	-0.455982	1	5	1	0.00212766	470	2584	37166	CG15093
	dme_M00307	Pyruvate oxidation, pyruvate => acetyl-CoA	0.633825	-0.455982	1	5	1	0.00212766	470	2584	39988	CG7430
	dme_M00006	Pentose phosphate pathway, oxidative phase, glucose 6P => ribulose 5P	0.633825	-0.455982	1	5	1	0.00212766	470	2584	37166	CG15093
	dme_M00405	THC complex	0.633825	-0.455982	1	5	1	0.00212766	470	2584	39394	thoc6
	M00395	Decapping complex	0.633825	-0.455982	1	5	1	0.00212766	470	2584	34364	me31B
	dme_M00094	Ceramide biosynthesis	0.633825	-0.455982	1	5	1	0.00212766	470	2584	33836	ifc
	dme_M00395	Decapping complex	0.633825	-0.455982	1	5	1	0.00212766	470	2584	34364	me31B
	ko00983	Drug metabolism - other enzymes	0.642707	-0.442067	1	47	8	0.0170213	470	2584	4.09163e+39	pyd3,CG8353,alpha-Est2,bur,Ugt36Ba,r-l,Ugt35a,CG4302
	dme00983	Drug metabolism - other enzymes	0.642707	-0.442067	1	47	8	0.0170213	470	2584	4.09163e+39	pyd3,CG8353,alpha-Est2,bur,Ugt36Ba,r-l,Ugt35a,CG4302
	ko00790	Folate biosynthesis	0.659846	-0.415749	1	24	4	0.00851064	470	2584	3.22124e+19	CG2543,Pu,Mocs1,Dhfr
	dme00790	Folate biosynthesis	0.659846	-0.415749	1	24	4	0.00851064	470	2584	3.22124e+19	CG2543,Pu,Mocs1,Dhfr
	M00001	Glycolysis (Embden-Meyerhof pathway), glucose => pyruvate	0.659846	-0.415749	1	24	4	0.00851064	470	2584	3.58864e+19	Pgi,PyK,Gapdh1,Ald
	dme00630	Glyoxylate and dicarboxylate metabolism	0.659846	-0.415749	1	24	4	0.00851064	470	2584	3.16954e+19	CG10932,Acon,CG3011,Gip
	ko00630	Glyoxylate and dicarboxylate metabolism	0.659846	-0.415749	1	24	4	0.00851064	470	2584	3.16954e+19	CG10932,Acon,CG3011,Gip
	dme_M00001	Glycolysis (Embden-Meyerhof pathway), glucose => pyruvate	0.659846	-0.415749	1	24	4	0.00851064	470	2584	3.58864e+19	Pgi,PyK,Gapdh1,Ald
	ko00350	Tyrosine metabolism	0.662178	-0.41222	1	18	3	0.00638298	470	2584	455773678233373	Faa,Got1,Got2
	dme00350	Tyrosine metabolism	0.662178	-0.41222	1	18	3	0.00638298	470	2584	455773678233373	Faa,Got1,Got2
	ko00514	Other types of O-glycan biosynthesis	0.670887	-0.399155	1	12	2	0.00425532	470	2584	3109840314	O-fut2,fng
	dme_M00180	RNA polymerase II, eukaryotes	0.670887	-0.399155	1	12	2	0.00425532	470	2584	3616034796	Rpb5,RpII33
	M00180	RNA polymerase II, eukaryotes	0.670887	-0.399155	1	12	2	0.00425532	470	2584	3616034796	Rpb5,RpII33
	dme00514	Other types of O-glycan biosynthesis	0.670887	-0.399155	1	12	2	0.00425532	470	2584	3109840314	O-fut2,fng
	M00052	Pyrimidine ribonucleotide biosynthesis, UMP => UDP/UTP,CDP/CTP	0.700557	-0.355879	1	6	1	0.00212766	470	2584	39645	CTPsyn
	dme_M00052	Pyrimidine ribonucleotide biosynthesis, UMP => UDP/UTP,CDP/CTP	0.700557	-0.355879	1	6	1	0.00212766	470	2584	39645	CTPsyn
	dme_M00050	Guanine ribonucleotide biosynthesis IMP => GDP,GTP	0.7146	-0.336032	1	13	2	0.00425532	470	2584	4262045830	PyK,bur
	dme00760	Nicotinate and nicotinamide metabolism	0.7146	-0.336032	1	13	2	0.00425532	470	2584	3362636507	CG3714,CG33156
	ko00760	Nicotinate and nicotinamide metabolism	0.7146	-0.336032	1	13	2	0.00425532	470	2584	3362636507	CG3714,CG33156
	ko00590	Arachidonic acid metabolism	0.7146	-0.336032	1	13	2	0.00425532	470	2584	4117339856	CG16817,Su(P)
	M00050	Guanine ribonucleotide biosynthesis IMP => GDP,GTP	0.7146	-0.336032	1	13	2	0.00425532	470	2584	4262045830	PyK,bur
	dme00590	Arachidonic acid metabolism	0.7146	-0.336032	1	13	2	0.00425532	470	2584	4117339856	CG16817,Su(P)
	ko04630	Jak-STAT signaling pathway	0.733366	-0.31011	1	20	3	0.00638298	470	2584	424464242832813	Pi3K92E,Stat92E,os
	dme04630	Jak-STAT signaling pathway	0.733366	-0.31011	1	20	3	0.00638298	470	2584	424464242832813	Pi3K92E,Stat92E,os
	ko03022	Basal transcription factors	0.739189	-0.302201	1	39	6	0.012766	470	2584	3.74144e+29	Xpd,Ak6,Tbp,CycH,TfIIEalpha,Cdk7
	dme03022	Basal transcription factors	0.739189	-0.302201	1	39	6	0.012766	470	2584	3.74144e+29	Xpd,Ak6,Tbp,CycH,TfIIEalpha,Cdk7
	dme04745	Phototransduction - fly	0.751391	-0.285829	1	27	4	0.00851064	470	2584	2.4642e+20	CG30054,Act57B,Plc21C,Act87E
	ko04745	Phototransduction - fly	0.751391	-0.285829	1	27	4	0.00851064	470	2584	2.4642e+20	CG30054,Act57B,Plc21C,Act87E
	ko00532	Glycosaminoglycan biosynthesis - chondroitin sulfate / dermatan sulfate	0.755149	-0.28084	1	7	1	0.00212766	470	2584	38288	oxt
	M00397	Lsm 1-7 complex	0.755149	-0.28084	1	7	1	0.00212766	470	2584	35003	LSm7
	M00099	Sphingosine biosynthesis	0.755149	-0.28084	1	7	1	0.00212766	470	2584	33836	ifc
	dme_M00099	Sphingosine biosynthesis	0.755149	-0.28084	1	7	1	0.00212766	470	2584	33836	ifc
	M00396	Lsm 2-8 complex	0.755149	-0.28084	1	7	1	0.00212766	470	2584	35003	LSm7
	dme_M00396	Lsm 2-8 complex	0.755149	-0.28084	1	7	1	0.00212766	470	2584	35003	LSm7
	dme00532	Glycosaminoglycan biosynthesis - chondroitin sulfate / dermatan sulfate	0.755149	-0.28084	1	7	1	0.00212766	470	2584	38288	oxt
	dme_M00397	Lsm 1-7 complex	0.755149	-0.28084	1	7	1	0.00212766	470	2584	35003	LSm7
	M00389	APC/C complex	0.787456	-0.238948	1	15	2	0.00425532	470	2584	3247334968	shtd,fzy
	dme_M00389	APC/C complex	0.787456	-0.238948	1	15	2	0.00425532	470	2584	3247334968	shtd,fzy
	dme_M00002	Glycolysis, core module involving three-carbon compounds	0.787456	-0.238948	1	15	2	0.00425532	470	2584	4262035728	PyK,Gapdh1
	M00002	Glycolysis, core module involving three-carbon compounds	0.787456	-0.238948	1	15	2	0.00425532	470	2584	4262035728	PyK,Gapdh1
	ko00052	Galactose metabolism	0.790433	-0.235175	1	35	5	0.0106383	470	2584	3.58244e+24	Mal-A1,CG10467,CG9436,CG10863,Galt
	dme00052	Galactose metabolism	0.790433	-0.235175	1	35	5	0.0106383	470	2584	3.58244e+24	Mal-A1,CG10467,CG9436,CG10863,Galt
	dme04330	Notch signaling pathway	0.792186	-0.232959	1	22	3	0.00638298	470	2584	385654316240314	Rpd3,gro,fng
	ko04330	Notch signaling pathway	0.792186	-0.232959	1	22	3	0.00638298	470	2584	385654316240314	Rpd3,gro,fng
	M00549	Nucleotide sugar biosynthesis, glucose => UDP-glucose	0.799806	-0.223386	1	8	1	0.00212766	470	2584	33935	Galt
	M00428	eIF4F complex	0.799806	-0.223386	1	8	1	0.00212766	470	2584	38923	eIF4E-3
	dme_M00361	Nucleotide sugar biosynthesis, eukaryotes	0.799806	-0.223386	1	8	1	0.00212766	470	2584	33935	Galt
	dme_M00428	eIF4F complex	0.799806	-0.223386	1	8	1	0.00212766	470	2584	38923	eIF4E-3
	M00361	Nucleotide sugar biosynthesis, eukaryotes	0.799806	-0.223386	1	8	1	0.00212766	470	2584	33935	Galt
	dme_M00549	Nucleotide sugar biosynthesis, glucose => UDP-glucose	0.799806	-0.223386	1	8	1	0.00212766	470	2584	33935	Galt
	dme00860	Porphyrin and chlorophyll metabolism	0.8213	-0.196866	1	43	6	0.012766	470	2584	5.35134e+29	Ugt36Ba,CG3803,Ugt35a,CG4302,Ppox,Coprox
	ko00860	Porphyrin and chlorophyll metabolism	0.8213	-0.196866	1	43	6	0.012766	470	2584	5.35134e+29	Ugt36Ba,CG3803,Ugt35a,CG4302,Ppox,Coprox
	dme00053	Ascorbate and aldarate metabolism	0.822778	-0.195069	1	30	4	0.00851064	470	2584	3.42565e+19	Aldh,Ugt36Ba,Ugt35a,CG4302
	ko00053	Ascorbate and aldarate metabolism	0.822778	-0.195069	1	30	4	0.00851064	470	2584	3.42565e+19	Aldh,Ugt36Ba,Ugt35a,CG4302
	ko04391	Hippo signaling pathway - fly	0.840602	-0.173637	1	57	8	0.0170213	470	2584	3.49245e+39	CycE,tws,14-3-3zeta,dia,fj,Act57B,l(2)gl,Act87E
	dme04391	Hippo signaling pathway - fly	0.840602	-0.173637	1	57	8	0.0170213	470	2584	3.49245e+39	CycE,tws,14-3-3zeta,dia,fj,Act57B,l(2)gl,Act87E
	dme_M00160	V-type ATPase, eukaryotes	0.842465	-0.171423	1	31	4	0.00851064	470	2584	3.59444e+19	VhaAC45,Vha44,Vha68-2,VhaAC39-1
	M00160	V-type ATPase, eukaryotes	0.842465	-0.171423	1	31	4	0.00851064	470	2584	3.59444e+19	VhaAC45,Vha44,Vha68-2,VhaAC39-1
	M00131	Inositol phosphate metabolism, Ins(1,3,4,5)P4 => Ins(1,3,4)P3 => myo-inositol	0.866205	-0.143633	1	10	1	0.00212766	470	2584	39740	CG17029
	ko00920	Sulfur metabolism	0.866205	-0.143633	1	10	1	0.00212766	470	2584	36233	CG30022
	dme_M00131	Inositol phosphate metabolism, Ins(1,3,4,5)P4 => Ins(1,3,4)P3 => myo-inositol	0.866205	-0.143633	1	10	1	0.00212766	470	2584	39740	CG17029
	dme00920	Sulfur metabolism	0.866205	-0.143633	1	10	1	0.00212766	470	2584	36233	CG30022
	ko00500	Starch and sucrose metabolism	0.879262	-0.128672	1	60	8	0.0170213	470	2584	3.40175e+39	CG5177,Ugt36Ba,CG9485,Ugt35a,GlyP,Pgi,Mal-A1,CG4302
	dme00500	Starch and sucrose metabolism	0.879262	-0.128672	1	60	8	0.0170213	470	2584	3.40175e+39	CG5177,Ugt36Ba,CG9485,Ugt35a,GlyP,Pgi,Mal-A1,CG4302
	M00130	Inositol phosphate metabolism, PI=> PIP2 => Ins(1,4,5)P3 => Ins(1,3,4,5)P4	0.890636	-0.11582	1	11	1	0.00212766	470	2584	33204	Plc21C
	dme_M00130	Inositol phosphate metabolism, PI=> PIP2 => Ins(1,4,5)P3 => Ins(1,3,4,5)P4	0.890636	-0.11582	1	11	1	0.00212766	470	2584	33204	Plc21C
	ko04350	TGF-beta signaling pathway	0.890802	-0.115633	1	34	4	0.00851064	470	2584	3.10273e+19	Rbf,dpp,Rbf2,Dad
	dme04350	TGF-beta signaling pathway	0.890802	-0.115633	1	34	4	0.00851064	470	2584	3.10273e+19	Rbf,dpp,Rbf2,Dad
	ko01212	Fatty acid metabolism	0.891337	-0.115033	1	41	5	0.0106383	470	2584	3.99103e+26	beg,CG10932,ACC,CG17374,CG3523
	dme01212	Fatty acid metabolism	0.891337	-0.115033	1	41	5	0.0106383	470	2584	3.99103e+26	beg,CG10932,ACC,CG17374,CG3523
	dme_M00014	Glucuronate pathway (uronate pathway)	0.903753	-0.101199	1	35	4	0.00851064	470	2584	5.35134e+19	Ugt36Ba,Ugt35a,CG4302,Sodh-2
	M00014	Glucuronate pathway (uronate pathway)	0.903753	-0.101199	1	35	4	0.00851064	470	2584	5.35134e+19	Ugt36Ba,Ugt35a,CG4302,Sodh-2
	dme00534	Glycosaminoglycan biosynthesis - heparan sulfate / heparin	0.910613	-0.0936375	1	12	1	0.00212766	470	2584	38288	oxt
	ko00534	Glycosaminoglycan biosynthesis - heparan sulfate / heparin	0.910613	-0.0936375	1	12	1	0.00212766	470	2584	38288	oxt
	ko00562	Inositol phosphate metabolism	0.915329	-0.0884721	1	36	4	0.00851064	470	2584	3.94044e+19	CG10426,CG17029,Pi3K92E,Plc21C
	dme00562	Inositol phosphate metabolism	0.915329	-0.0884721	1	36	4	0.00851064	470	2584	3.94044e+19	CG10426,CG17029,Pi3K92E,Plc21C
	dme00561	Glycerolipid metabolism	0.923785	-0.0792757	1	44	5	0.0106383	470	2584	4.39133e+24	Gyk,Aldh,mdy,CG9436,CG10863
	ko00561	Glycerolipid metabolism	0.923785	-0.0792757	1	44	5	0.0106383	470	2584	4.39133e+24	Gyk,Aldh,mdy,CG9436,CG10863
	dme00564	Glycerophospholipid metabolism	0.924688	-0.0782994	1	58	7	0.0148936	470	2584	4.28494e+34	CG5991,CG7718,nes,Taz,Pld,CG4825,Gpo-1
	ko00564	Glycerophospholipid metabolism	0.924688	-0.0782994	1	58	7	0.0148936	470	2584	4.28494e+34	CG5991,CG7718,nes,Taz,Pld,CG4825,Gpo-1
	dme_M00055	N-glycan precursor biosynthesis	0.926947	-0.0758587	1	13	1	0.00212766	470	2584	43031	CG11851
	M00055	N-glycan precursor biosynthesis	0.926947	-0.0758587	1	13	1	0.00212766	470	2584	43031	CG11851
	dme00071	Fatty acid degradation	0.930445	-0.0720925	1	30	3	0.00638298	470	2584	342563169533911	Aldh,CG10932,CG9547
	ko00071	Fatty acid degradation	0.930445	-0.0720925	1	30	3	0.00638298	470	2584	316953425633911	CG10932,Aldh,CG9547
	M00089	Triacylglycerol biosynthesis	0.940302	-0.0615544	1	14	1	0.00212766	470	2584	44887	mdy
	dme_M00089	Triacylglycerol biosynthesis	0.940302	-0.0615544	1	14	1	0.00212766	470	2584	44887	mdy
	ko04070	Phosphatidylinositol signaling system	0.95652	-0.044454	1	41	4	0.00851064	470	2584	3.94044e+19	CG10426,CG17029,Pi3K92E,Plc21C
	dme04070	Phosphatidylinositol signaling system	0.95652	-0.044454	1	41	4	0.00851064	470	2584	3.94044e+19	CG10426,CG17029,Pi3K92E,Plc21C
	dme00531	Glycosaminoglycan degradation	0.960144	-0.0406722	1	16	1	0.00212766	470	2584	34544	CG6201
	ko00531	Glycosaminoglycan degradation	0.960144	-0.0406722	1	16	1	0.00212766	470	2584	34544	CG6201
	M00353	Spliceosome, Prp19/CDC5L complex	0.967438	-0.0331035	1	17	1	0.00212766	470	2584	37123	Prp19
	dme_M00353	Spliceosome, Prp19/CDC5L complex	0.967438	-0.0331035	1	17	1	0.00212766	470	2584	37123	Prp19
	ko04150	mTOR signaling pathway	0.971626	-0.028784	1	36	3	0.00638298	470	2584	389234244644432	eIF4E-3,Pi3K92E,ird5
	dme04150	mTOR signaling pathway	0.971626	-0.028784	1	36	3	0.00638298	470	2584	389234244644432	eIF4E-3,Pi3K92E,ird5
	dme04013	MAPK signaling pathway - fly	0.9734	-0.02696	1	18	1	0.00212766	470	2584	35717	tor
	ko04013	MAPK signaling pathway - fly	0.9734	-0.02696	1	18	1	0.00212766	470	2584	35717	tor
	ko00600	Sphingolipid metabolism	0.974404	-0.0259294	1	28	2	0.00425532	470	2584	4143633836	CG6962,ifc
	dme00600	Sphingolipid metabolism	0.974404	-0.0259294	1	28	2	0.00425532	470	2584	4143633836	CG6962,ifc
	dme_M00341	Proteasome, 19S regulatory particle (PA700)	0.988164	-0.0119062	1	22	1	0.00212766	470	2584	31567	Rpt4
	M00341	Proteasome, 19S regulatory particle (PA700)	0.988164	-0.0119062	1	22	1	0.00212766	470	2584	31567	Rpt4
	ko04145	Phagosome	0.988618	-0.011447	1	74	7	0.0148936	470	2584	3.59444e+34	VhaAC45,Vha44,Act57B,Dlic,Vha68-2,Act87E,VhaAC39-1
	dme04145	Phagosome	0.988618	-0.011447	1	74	7	0.0148936	470	2584	3.59444e+34	VhaAC45,Vha44,Act57B,Dlic,Vha68-2,Act87E,VhaAC39-1
	ko00565	Ether lipid metabolism	0.990336	-0.00971133	1	23	1	0.00212766	470	2584	35554	Pld
	dme00565	Ether lipid metabolism	0.990336	-0.00971133	1	23	1	0.00212766	470	2584	35554	Pld
	ko04340	Hedgehog signaling pathway	0.992109	-0.00792201	1	24	1	0.00212766	470	2584	33432	dpp
	dme04340	Hedgehog signaling pathway	0.992109	-0.00792201	1	24	1	0.00212766	470	2584	33432	dpp
	ko00520	Amino sugar and nucleotide sugar metabolism	0.993203	-0.00682046	1	45	3	0.00638298	470	2584	358863837033935	Pgi,Cht7,Galt
	dme00520	Amino sugar and nucleotide sugar metabolism	0.993203	-0.00682046	1	45	3	0.00638298	470	2584	358863837033935	Pgi,Cht7,Galt
	ko04320	Dorso-ventral axis formation	0.995707	-0.00430184	1	27	1	0.00212766	470	2584	41666	sqd
	dme04320	Dorso-ventral axis formation	0.995707	-0.00430184	1	27	1	0.00212766	470	2584	41666	sqd
	ko04120	Ubiquitin mediated proteolysis	0.99629	-0.00371665	1	98	9	0.0191489	470	2584	3.71233e+44	Prp19,shtd,lwr,hyd,Fancl,pic,Ubc12,Uba1,fzy
	dme04120	Ubiquitin mediated proteolysis	0.99629	-0.00371665	1	98	9	0.0191489	470	2584	3.71233e+44	Prp19,shtd,lwr,hyd,Fancl,pic,Ubc12,Uba1,fzy
	ko04080	Neuroactive ligand-receptor interaction	0.998525	-0.00147602	1	44	2	0.00425532	470	2584	3323136218	CG2789,thetaTry
	dme04080	Neuroactive ligand-receptor interaction	0.998525	-0.00147602	1	44	2	0.00425532	470	2584	3323136218	CG2789,thetaTry
	ko03010	Ribosome	0.99898	-0.00102035	1	131	12	0.0255319	470	2584	3.25234e+61	mRpL3,RpL19,RpL34a,mRpL18,mRpL4,mRpS14,mRpL16,mRpL10,mRpS18A,mRpL15,mRpL19,tko
	dme03010	Ribosome	0.99898	-0.00102035	1	131	12	0.0255319	470	2584	3.25234e+61	mRpL3,RpL19,RpL34a,mRpL18,mRpL4,mRpS14,mRpL16,mRpL10,mRpS18A,mRpL15,mRpL19,tko
	dme04146	Peroxisome	0.999288	-0.000712538	1	68	4	0.00851064	470	2584	3.68784e+19	Sod2,CG10268,CG14777,CG10672
	ko04146	Peroxisome	0.999288	-0.000712538	1	68	4	0.00851064	470	2584	3.68784e+19	Sod2,CG10268,CG14777,CG10672
	ko00510	N-Glycan biosynthesis	0.999439	-0.000561091	1	37	1	0.00212766	470	2584	43031	CG11851
	dme00510	N-Glycan biosynthesis	0.999439	-0.000561091	1	37	1	0.00212766	470	2584	43031	CG11851
	dme03050	Proteasome	0.999514	-0.00048643	1	50	2	0.00425532	470	2584	3227431567	REG,Rpt4
	ko03050	Proteasome	0.999514	-0.00048643	1	50	2	0.00425532	470	2584	3227431567	REG,Rpt4
	dme04310	Wnt signaling pathway	0.999875	-0.000124626	1	88	5	0.0106383	470	2584	5.34394e+24	pont,gro,ebi,Plc21C,CG3226
	ko04310	Wnt signaling pathway	0.999875	-0.000124626	1	88	5	0.0106383	470	2584	5.34394e+24	pont,gro,ebi,Plc21C,CG3226
	dme04142	Lysosome	0.99991	-8.98e-05	1	90	5	0.0106383	470	2584	3.59444e+24	VhaAC45,CG4847,CG17119,CG6201,VhaAC39-1
	ko04142	Lysosome	0.99991	-8.98e-05	1	90	5	0.0106383	470	2584	3.59444e+24	VhaAC45,CG4847,CG17119,CG6201,VhaAC39-1
	ko04144	Endocytosis	1	-3.95e-07	1	87	2	0.00425532	470	2584	3555442059	Pld,Dad
	dme04144	Endocytosis	1	-3.95e-07	1	87	2	0.00425532	470	2584	3555442059	Pld,Dad
	M00177	Ribosome, eukaryotes	1	-2.66e-07	1	89	2	0.00425532	470	2584	3799543169	RpL19,RpL34a
	dme_M00177	Ribosome, eukaryotes	1	-2.66e-07	1	89	2	0.00425532	470	2584	3799543169	RpL19,RpL34a
	ko04141	Protein processing in endoplasmic reticulum	1	-2.42e-08	1	126	4	0.00851064	470	2584	3.26174e+19	eIF-2alpha,Hsc70Cb,Ubqn,l(2)efl
	dme04141	Protein processing in endoplasmic reticulum	1	-2.42e-08	1	126	4	0.00851064	470	2584	3.26174e+19	eIF-2alpha,Hsc70Cb,Ubqn,l(2)efl
	M00400	p97-Ufd1-Npl4 complex	1	-5.59e-12	1	3	0	0	470	2584
	dme00780	Biotin metabolism	1	-5.59e-12	1	3	0	0	470	2584
	dme_M00058	Glycosaminoglycan biosynthesis, chondroitin sulfate backbone	1	-5.59e-12	1	3	0	0	470	2584
	dme_M00151	Cytochrome bc1 complex respiratory unit	1	-5.59e-12	1	3	0	0	470	2584
	dme_M00015	Proline biosynthesis, glutamate => proline	1	-5.59e-12	1	3	0	0	470	2584
	dme_M00400	p97-Ufd1-Npl4 complex	1	-5.59e-12	1	3	0	0	470	2584
	dme_M00134	Polyamine biosynthesis, arginine => ornithine => putrescine	1	-5.59e-12	1	3	0	0	470	2584
	M00151	Cytochrome bc1 complex respiratory unit	1	-5.59e-12	1	3	0	0	470	2584
	M00058	Glycosaminoglycan biosynthesis, chondroitin sulfate backbone	1	-5.59e-12	1	3	0	0	470	2584
	dme_M00086	beta-Oxidation, acyl-CoA synthesis	1	-5.59e-12	1	3	0	0	470	2584
	M00410	ESCRT-II complex	1	-5.59e-12	1	3	0	0	470	2584
	ko01220	Degradation of aromatic compounds	1	-5.59e-12	1	3	0	0	470	2584
	ko00780	Biotin metabolism	1	-5.59e-12	1	3	0	0	470	2584
	dme01220	Degradation of aromatic compounds	1	-5.59e-12	1	3	0	0	470	2584
	M00134	Polyamine biosynthesis, arginine => ornithine => putrescine	1	-5.59e-12	1	3	0	0	470	2584
	dme_M00020	Serine biosynthesis, glycerate-3P => serine	1	-5.59e-12	1	3	0	0	470	2584
	dme_M00410	ESCRT-II complex	1	-5.59e-12	1	3	0	0	470	2584
	M00020	Serine biosynthesis, glycerate-3P => serine	1	-5.59e-12	1	3	0	0	470	2584
	M00015	Proline biosynthesis, glutamate => proline	1	-5.59e-12	1	3	0	0	470	2584
	M00086	beta-Oxidation, acyl-CoA synthesis	1	-5.59e-12	1	3	0	0	470	2584
	ko00232	Caffeine metabolism	1	-5.51e-12	1	2	0	0	470	2584
	dme00232	Caffeine metabolism	1	-5.51e-12	1	2	0	0	470	2584
	M00408	ESCRT-0 complex	1	-5.51e-12	1	2	0	0	470	2584
	dme00100	Steroid biosynthesis	1	-5.51e-12	1	2	0	0	470	2584
	M00338	Cysteine biosynthesis, homocysteine + serine => cysteine	1	-5.51e-12	1	2	0	0	470	2584
	dme_M00338	Cysteine biosynthesis, homocysteine + serine => cysteine	1	-5.51e-12	1	2	0	0	470	2584
	M00100	Sphingosine degradation	1	-5.51e-12	1	2	0	0	470	2584
	ko00100	Steroid biosynthesis	1	-5.51e-12	1	2	0	0	470	2584
	dme_M00100	Sphingosine degradation	1	-5.51e-12	1	2	0	0	470	2584
	dme_M00408	ESCRT-0 complex	1	-5.51e-12	1	2	0	0	470	2584
	M00384	Cul3-SPOP complex	1	-2.31e-12	1	4	0	0	470	2584
	M00402	Translocon-associated protein (TRAP) complex	1	-2.31e-12	1	4	0	0	470	2584
	ko00533	Glycosaminoglycan biosynthesis - keratan sulfate	1	-2.31e-12	1	4	0	0	470	2584
	M00401	Sec61 complex	1	-2.31e-12	1	4	0	0	470	2584
	dme_M00401	Sec61 complex	1	-2.31e-12	1	4	0	0	470	2584
	dme00533	Glycosaminoglycan biosynthesis - keratan sulfate	1	-2.31e-12	1	4	0	0	470	2584
	dme_M00384	Cul3-SPOP complex	1	-2.31e-12	1	4	0	0	470	2584
	dme_M00402	Translocon-associated protein (TRAP) complex	1	-2.31e-12	1	4	0	0	470	2584
	M00073	N-glycan precursor trimming	1	-1.99e-12	1	5	0	0	470	2584
	M00409	ESCRT-I complex	1	-1.99e-12	1	5	0	0	470	2584
	dme_M00059	Glycosaminoglycan biosynthesis, heparan sulfate backbone	1	-1.99e-12	1	5	0	0	470	2584
	dme_M00415	Fatty acid biosynthesis, elongation, endoplasmic reticulum	1	-1.99e-12	1	5	0	0	470	2584
	dme_M00409	ESCRT-I complex	1	-1.99e-12	1	5	0	0	470	2584
	M00059	Glycosaminoglycan biosynthesis, heparan sulfate backbone	1	-1.99e-12	1	5	0	0	470	2584
	dme_M00128	Ubiquinone biosynthesis, eukaryotes, 4-hydroxybenzoate => ubiquinone	1	-1.99e-12	1	5	0	0	470	2584
	M00415	Fatty acid biosynthesis, elongation, endoplasmic reticulum	1	-1.99e-12	1	5	0	0	470	2584
	dme_M00120	Coenzyme A biosynthesis, pantothenate => CoA	1	-1.99e-12	1	5	0	0	470	2584
	M00085	Fatty acid biosynthesis, elongation, mitochondria	1	-1.99e-12	1	5	0	0	470	2584
	M00128	Ubiquinone biosynthesis, eukaryotes, 4-hydroxybenzoate => ubiquinone	1	-1.99e-12	1	5	0	0	470	2584
	M00013	Malonate semialdehyde pathway, propanoyl-CoA => Acetyl-CoA	1	-1.99e-12	1	5	0	0	470	2584
	dme_M00013	Malonate semialdehyde pathway, propanoyl-CoA => Acetyl-CoA	1	-1.99e-12	1	5	0	0	470	2584
	dme_M00085	Fatty acid biosynthesis, elongation, mitochondria	1	-1.99e-12	1	5	0	0	470	2584
	M00120	Coenzyme A biosynthesis, pantothenate => CoA	1	-1.99e-12	1	5	0	0	470	2584
	dme_M00073	N-glycan precursor trimming	1	-1.99e-12	1	5	0	0	470	2584
	ko00472	D-Arginine and D-ornithine metabolism	1	9.07e-14	1	1	0	0	470	2584
	ko00300	Lysine biosynthesis	1	9.07e-14	1	1	0	0	470	2584
	dme00300	Lysine biosynthesis	1	9.07e-14	1	1	0	0	470	2584
	dme00472	D-Arginine and D-ornithine metabolism	1	9.07e-14	1	1	0	0	470	2584
	dme00750	Vitamin B6 metabolism	1	2.97e-12	1	6	0	0	470	2584
	M00383	ECV complex	1	2.97e-12	1	6	0	0	470	2584
	dme_M00092	Phosphatidylethanolamine (PE) biosynthesis, ethanolamine => PE	1	2.97e-12	1	6	0	0	470	2584
	M00092	Phosphatidylethanolamine (PE) biosynthesis, ethanolamine => PE	1	2.97e-12	1	6	0	0	470	2584
	M00404	COPII complex	1	2.97e-12	1	6	0	0	470	2584
	dme00604	Glycosphingolipid biosynthesis - ganglio series	1	2.97e-12	1	6	0	0	470	2584
	dme_M00404	COPII complex	1	2.97e-12	1	6	0	0	470	2584
	ko00750	Vitamin B6 metabolism	1	2.97e-12	1	6	0	0	470	2584
	ko00604	Glycosphingolipid biosynthesis - ganglio series	1	2.97e-12	1	6	0	0	470	2584
	dme_M00383	ECV complex	1	2.97e-12	1	6	0	0	470	2584
	dme_M00072	N-glycosylation by oligosaccharyltransferase	1	5.61e-12	1	7	0	0	470	2584
	dme00430	Taurine and hypotaurine metabolism	1	5.61e-12	1	7	0	0	470	2584
	ko00603	Glycosphingolipid biosynthesis - globo series	1	5.61e-12	1	7	0	0	470	2584
	M00072	N-glycosylation by oligosaccharyltransferase	1	5.61e-12	1	7	0	0	470	2584
	ko00591	Linoleic acid metabolism	1	5.61e-12	1	7	0	0	470	2584
	dme00603	Glycosphingolipid biosynthesis - globo series	1	5.61e-12	1	7	0	0	470	2584
	dme00591	Linoleic acid metabolism	1	5.61e-12	1	7	0	0	470	2584
	ko00430	Taurine and hypotaurine metabolism	1	5.61e-12	1	7	0	0	470	2584
	M00412	ESCRT-III complex	1	7.58e-12	1	8	0	0	470	2584
	dme_M00412	ESCRT-III complex	1	7.58e-12	1	8	0	0	470	2584
	ko00130	Ubiquinone and other terpenoid-quinone biosynthesis	1	8.02e-12	1	9	0	0	470	2584
	dme00130	Ubiquinone and other terpenoid-quinone biosynthesis	1	8.02e-12	1	9	0	0	470	2584
	M00087	beta-Oxidation	1	9.06e-12	1	12	0	0	470	2584
	dme_M00087	beta-Oxidation	1	9.06e-12	1	12	0	0	470	2584
	dme00592	alpha-Linolenic acid metabolism	1	9.06e-12	1	12	0	0	470	2584
	dme00062	Fatty acid elongation	1	9.06e-12	1	12	0	0	470	2584
	ko00592	alpha-Linolenic acid metabolism	1	9.06e-12	1	12	0	0	470	2584
	ko00062	Fatty acid elongation	1	9.06e-12	1	12	0	0	470	2584
	dme_M00380	SCF-BTRC complex	1	9.62e-12	1	11	0	0	470	2584
	M00387	SCF-FBW7 complex	1	9.62e-12	1	11	0	0	470	2584
	M00380	SCF-BTRC complex	1	9.62e-12	1	11	0	0	470	2584
	dme_M00381	SCF-SKP2 complex	1	9.62e-12	1	11	0	0	470	2584
	M00381	SCF-SKP2 complex	1	9.62e-12	1	11	0	0	470	2584
	dme_M00387	SCF-FBW7 complex	1	9.62e-12	1	11	0	0	470	2584
	ko00740	Riboflavin metabolism	1	1.31e-11	1	13	0	0	470	2584
	dme00740	Riboflavin metabolism	1	1.31e-11	1	13	0	0	470	2584
	dme00512	Mucin type O-Glycan biosynthesis	1	1.79e-11	1	15	0	0	470	2584
	ko00512	Mucin type O-Glycan biosynthesis	1	1.79e-11	1	15	0	0	470	2584
	dme01040	Biosynthesis of unsaturated fatty acids	1	2.07e-11	1	17	0	0	470	2584
	ko01040	Biosynthesis of unsaturated fatty acids	1	2.07e-11	1	17	0	0	470	2584
	dme00563	Glycosylphosphatidylinositol(GPI)-anchor biosynthesis	1	2.14e-11	1	19	0	0	470	2584
	ko00563	Glycosylphosphatidylinositol(GPI)-anchor biosynthesis	1	2.14e-11	1	19	0	0	470	2584
	ko04140	Regulation of autophagy	1	2.21e-11	1	18	0	0	470	2584
	dme04140	Regulation of autophagy	1	2.21e-11	1	18	0	0	470	2584
	ko04130	SNARE interactions in vesicular transport	1	2.36e-11	1	20	0	0	470	2584
	dme04130	SNARE interactions in vesicular transport	1	2.36e-11	1	20	0	0	470	2584
	dme03060	Protein export	1	2.94e-11	1	22	0	0	470	2584
	ko03060	Protein export	1	2.94e-11	1	22	0	0	470	2584
	ko00511	Other glycan degradation	1	2.94e-11	1	22	0	0	470	2584
	dme00511	Other glycan degradation	1	2.94e-11	1	22	0	0	470	2584
	dme_M00340	Proteasome, 20S core particle	1	2.99e-11	1	25	0	0	470	2584
	M00340	Proteasome, 20S core particle	1	2.99e-11	1	25	0	0	470	2584

## Sheet: Cl8
Significant Kegg terms	TermID	Term	Enrichment	logP	FDR_BH	Genes in Term	Target Genes in Term	Fraction of Targets in Term	Total Target Genes	Total Genes	Entrez Gene IDs	Gene Symbols
Enrichment p<0.01	ko03022	Basal transcription factors	0.00350983	-5.65219	0.7211	39	8	0.0462428	173	2584	3.34694e+39	Taf10,mia,e(y)1,Tfb1,hay,Taf10b,TfIIFbeta,Taf2
	dme03022	Basal transcription factors	0.00350983	-5.65219	0.7211	39	8	0.0462428	173	2584	3.34694e+39	Taf10,mia,e(y)1,Tfb1,hay,Taf10b,TfIIFbeta,Taf2
	ko04130	SNARE interactions in vesicular transport	0.00862295	-4.75333	0.7211	20	5	0.0289017	173	2584	3.98474e+24	Syx8,Syx18,Vti1,Syx7,Use1
Enrichment p<0.01	dme04130	SNARE interactions in vesicular transport	0.00862295	-4.75333	0.7211	20	5	0.0289017	173	2584	3.98474e+24	Syx8,Syx18,Vti1,Syx7,Use1
	ko04391	Hippo signaling pathway - fly	0.0120432	-4.41925	0.7211	57	9	0.0520231	173	2584	2.76894e+47	Pp2A-29B,Zyx,mts,par-6,vn,ex,dm,Act5C,dco
	dme04391	Hippo signaling pathway - fly	0.0120432	-4.41925	0.7211	57	9	0.0520231	173	2584	2.76894e+47	Pp2A-29B,Zyx,mts,par-6,vn,ex,dm,Act5C,dco
	M00181	RNA polymerase III, eukaryotes	0.0186949	-3.9795	0.7211	16	4	0.0231214	173	2584	4.04154e+21	Rpb8,CG33785,RpII18,CG3756
	dme_M00181	RNA polymerase III, eukaryotes	0.0186949	-3.9795	0.7211	16	4	0.0231214	173	2584	4.04154e+21	Rpb8,CG33785,RpII18,CG3756
	ko04350	TGF-beta signaling pathway	0.0230648	-3.76945	0.7211	34	6	0.0346821	173	2584	2.76894e+31	Pp2A-29B,Rho1,skpB,sog,dm,mts
	dme04350	TGF-beta signaling pathway	0.0230648	-3.76945	0.7211	34	6	0.0346821	173	2584	2.76894e+31	Pp2A-29B,Rho1,skpB,sog,dm,mts
	M00426	Survival motor neuron (SMN) complex	0.0244454	-3.71131	0.7211	4	2	0.0115607	173	2584	4008737727	Gem2,wmd
	dme_M00426	Survival motor neuron (SMN) complex	0.0244454	-3.71131	0.7211	4	2	0.0115607	173	2584	4008737727	Gem2,wmd
	dme03460	Fanconi anemia pathway	0.0264112	-3.63397	0.7211	26	5	0.0289017	173	2584	3.10444e+24	mus81,slx1,DNApol-eta,CG9062,Pms2
	ko03460	Fanconi anemia pathway	0.0264112	-3.63397	0.7211	26	5	0.0289017	173	2584	3.10444e+24	mus81,slx1,DNApol-eta,CG9062,Pms2
	M00036	Leucine degradation, leucine => acetoacetate + acetyl-CoA	0.0326376	-3.42229	0.7211	11	3	0.017341	173	2584	4.37503e+16	CG2118,CG17691,CG10399
	dme_M00036	Leucine degradation, leucine => acetoacetate + acetyl-CoA	0.0326376	-3.42229	0.7211	11	3	0.017341	173	2584	4.37503e+16	CG2118,CG17691,CG10399
	dme03020	RNA polymerase	0.035427	-3.34028	0.7211	28	5	0.0289017	173	2584	4.04154e+26	Rpb8,RpII140,CG33785,RpII18,CG3756
	ko03020	RNA polymerase	0.035427	-3.34028	0.7211	28	5	0.0289017	173	2584	4.04154e+26	Rpb8,RpII140,CG33785,RpII18,CG3756
	dme_M00059	Glycosaminoglycan biosynthesis, heparan sulfate backbone	0.0389633	-3.24513	0.7211	5	2	0.0115607	173	2584	3873636614	sfl,ttv
	M00059	Glycosaminoglycan biosynthesis, heparan sulfate backbone	0.0389633	-3.24513	0.7211	5	2	0.0115607	173	2584	3873636614	sfl,ttv
	dme_M00120	Coenzyme A biosynthesis, pantothenate => CoA	0.0389633	-3.24513	0.7211	5	2	0.0115607	173	2584	3864733742	Ppat-Dpck,CG5828
	M00120	Coenzyme A biosynthesis, pantothenate => CoA	0.0389633	-3.24513	0.7211	5	2	0.0115607	173	2584	3864733742	Ppat-Dpck,CG5828
	dme_M00180	RNA polymerase II, eukaryotes	0.041424	-3.18389	0.7211	12	3	0.017341	173	2584	404154172148312	Rpb8,RpII140,RpII18
	M00180	RNA polymerase II, eukaryotes	0.041424	-3.18389	0.7211	12	3	0.017341	173	2584	404154172148312	Rpb8,RpII140,RpII18
	dme00534	Glycosaminoglycan biosynthesis - heparan sulfate / heparin	0.041424	-3.18389	0.7211	12	3	0.017341	173	2584	387363661442380	sfl,ttv,Hs6st
	dme_M00182	RNA polymerase I, eukaryotes	0.041424	-3.18389	0.7211	12	3	0.017341	173	2584	404154831233712	Rpb8,RpII18,CG3756
	M00182	RNA polymerase I, eukaryotes	0.041424	-3.18389	0.7211	12	3	0.017341	173	2584	404154831233712	Rpb8,RpII18,CG3756
	ko00534	Glycosaminoglycan biosynthesis - heparan sulfate / heparin	0.041424	-3.18389	0.7211	12	3	0.017341	173	2584	387363661442380	sfl,ttv,Hs6st
	dme00240	Pyrimidine metabolism	0.0443299	-3.1161	0.7211	82	10	0.0578035	173	2584	3.77234e+51	CG33785,nmdyn-D7,RpII18,CG3756,CG11337,CG3788,Rpb8,CG11883,RpII140,RnrS
	ko00240	Pyrimidine metabolism	0.0443299	-3.1161	0.7211	82	10	0.0578035	173	2584	3.77234e+51	CG33785,nmdyn-D7,RpII18,CG3756,CG11337,CG3788,Rpb8,CG11883,RpII140,RnrS
	ko03450	Non-homologous end-joining	0.0559075	-2.88406	0.85259	6	2	0.0115607	173	2584	11741934565	Irbp,mre11
	dme03450	Non-homologous end-joining	0.0559075	-2.88406	0.85259	6	2	0.0115607	173	2584	11741934565	Irbp,mre11
	dme_M00295	BRCA1-associated genome surveillance complex (BASC)	0.0867368	-2.44488	1	16	3	0.017341	173	2584	352573456536705	CG10262,mre11,Pms2
	M00295	BRCA1-associated genome surveillance complex (BASC)	0.0867368	-2.44488	1	16	3	0.017341	173	2584	352573456536705	CG10262,mre11,Pms2
	ko03015	mRNA surveillance pathway	0.0925095	-2.38044	1	70	8	0.0462428	173	2584	2.76894e+43	Pp2A-29B,CG1109,CG34334,mts,wibg,Pabp2,Upf3,Cpsf100
	dme03015	mRNA surveillance pathway	0.0925095	-2.38044	1	70	8	0.0462428	173	2584	2.76894e+43	Pp2A-29B,CG1109,CG34334,mts,wibg,Pabp2,Upf3,Cpsf100
	dme_M00361	Nucleotide sugar biosynthesis, eukaryotes	0.0955704	-2.34789	1	8	2	0.0115607	173	2584	3906538911	UGP,CG7979
	M00361	Nucleotide sugar biosynthesis, eukaryotes	0.0955704	-2.34789	1	8	2	0.0115607	173	2584	3906538911	UGP,CG7979
	dme04068	FoxO signaling pathway	0.122097	-2.10294	1	51	6	0.0346821	173	2584	3.64973e+31	drk,p38c,Atg8a,Akt1,dco,alc
	ko04144	Endocytosis	0.124082	-2.08681	1	87	9	0.0520231	173	2584	3.10063e+46	mod(r),Traf6,Rbsn-5,Rho1,krz,par-6,Gprk1,CG5498,Rab7
	dme04144	Endocytosis	0.124082	-2.08681	1	87	9	0.0520231	173	2584	3.10063e+46	mod(r),Traf6,Rbsn-5,Rho1,krz,par-6,Gprk1,CG5498,Rab7
	dme00563	Glycosylphosphatidylinositol(GPI)-anchor biosynthesis	0.129897	-2.04102	1	19	3	0.017341	173	2584	3116342388246580	CG4406,CG4433,CG30381
	ko00563	Glycosylphosphatidylinositol(GPI)-anchor biosynthesis	0.129897	-2.04102	1	19	3	0.017341	173	2584	3116342388246580	CG4406,CG4433,CG30381
	dme00770	Pantothenate and CoA biosynthesis	0.140808	-1.96036	1	10	2	0.0115607	173	2584	3864733742	Ppat-Dpck,CG5828
	ko00920	Sulfur metabolism	0.140808	-1.96036	1	10	2	0.0115607	173	2584	3851432878	CG14997,CG7280
	M00290	Holo-TFIIH complex	0.140808	-1.96036	1	10	2	0.0115607	173	2584	3920236598	hay,Tfb1
	dme_M00290	Holo-TFIIH complex	0.140808	-1.96036	1	10	2	0.0115607	173	2584	3920236598	hay,Tfb1
	ko00770	Pantothenate and CoA biosynthesis	0.140808	-1.96036	1	10	2	0.0115607	173	2584	3864733742	Ppat-Dpck,CG5828
	dme00920	Sulfur metabolism	0.140808	-1.96036	1	10	2	0.0115607	173	2584	3851432878	CG14997,CG7280
	ko04630	Jak-STAT signaling pathway	0.145692	-1.92626	1	20	3	0.017341	173	2584	364973131041957	drk,dm,Akt1
	ko03430	Mismatch repair	0.145692	-1.92626	1	20	3	0.017341	173	2584	352573511936705	CG10262,tos,Pms2
	dme03430	Mismatch repair	0.145692	-1.92626	1	20	3	0.017341	173	2584	352573511936705	CG10262,tos,Pms2
	dme04630	Jak-STAT signaling pathway	0.145692	-1.92626	1	20	3	0.017341	173	2584	364973131041957	drk,dm,Akt1
	dme04146	Peroxisome	0.166407	-1.79332	1	68	7	0.0404624	173	2584	3.51404e+34	CG17597,CG12428,CG11077,CG17544,CG5009,CG10399,CG12268
	ko04146	Peroxisome	0.166407	-1.79332	1	68	7	0.0404624	173	2584	3.51404e+34	CG17597,CG12428,CG11077,CG17544,CG5009,CG10399,CG12268
	ko00511	Other glycan degradation	0.178989	-1.72043	1	22	3	0.017341	173	2584	359894217834835	CG1827,CG7985,CG33090
	dme00511	Other glycan degradation	0.178989	-1.72043	1	22	3	0.017341	173	2584	359894217834835	CG1827,CG7985,CG33090
	dme00780	Biotin metabolism	0.187772	-1.67253	1	3	1	0.00578035	173	2584	40692	CG12170
	dme_M00015	Proline biosynthesis, glutamate => proline	0.187772	-1.67253	1	3	1	0.00578035	173	2584	42284	P5cr
	M00291	MRN complex	0.187772	-1.67253	1	3	1	0.00578035	173	2584	34565	mre11
	dme00730	Thiamine metabolism	0.187772	-1.67253	1	3	1	0.00578035	173	2584	41417	CG14721
	ko00730	Thiamine metabolism	0.187772	-1.67253	1	3	1	0.00578035	173	2584	41417	CG14721
	ko00780	Biotin metabolism	0.187772	-1.67253	1	3	1	0.00578035	173	2584	40692	CG12170
	M00015	Proline biosynthesis, glutamate => proline	0.187772	-1.67253	1	3	1	0.00578035	173	2584	42284	P5cr
	dme_M00291	MRN complex	0.187772	-1.67253	1	3	1	0.00578035	173	2584	34565	mre11
	M00087	beta-Oxidation	0.18953	-1.66321	1	12	2	0.0115607	173	2584	3521337028	CG17544,CG5009
	dme_M00087	beta-Oxidation	0.18953	-1.66321	1	12	2	0.0115607	173	2584	3521337028	CG17544,CG5009
	dme00592	alpha-Linolenic acid metabolism	0.18953	-1.66321	1	12	2	0.0115607	173	2584	3521337028	CG17544,CG5009
	ko00592	alpha-Linolenic acid metabolism	0.18953	-1.66321	1	12	2	0.0115607	173	2584	3521337028	CG17544,CG5009
	dme03040	Spliceosome	0.211438	-1.55382	1	125	11	0.0635838	173	2584	3.65614e+54	pea,CG11964,U4-U6-60K,noi,Cypl,SF2,CG16941,Slu7,Hpr1,Prp38,cyp33
	ko03040	Spliceosome	0.211438	-1.55382	1	125	11	0.0635838	173	2584	3.65614e+54	pea,CG11964,U4-U6-60K,noi,Cypl,SF2,CG16941,Slu7,Hpr1,Prp38,cyp33
	ko04340	Hedgehog signaling pathway	0.214115	-1.54124	1	24	3	0.017341	173	2584	331963222143673	smo,CkIalpha,dco
	dme04340	Hedgehog signaling pathway	0.214115	-1.54124	1	24	3	0.017341	173	2584	331963222143673	smo,CkIalpha,dco
	dme00760	Nicotinate and nicotinamide metabolism	0.214668	-1.53866	1	13	2	0.0115607	173	2584	3612142987	CG11883,Nmnat
	ko00740	Riboflavin metabolism	0.214668	-1.53866	1	13	2	0.0115607	173	2584	3772179261628	primo-1,CG31469
	ko00760	Nicotinate and nicotinamide metabolism	0.214668	-1.53866	1	13	2	0.0115607	173	2584	3612142987	CG11883,Nmnat
	dme00740	Riboflavin metabolism	0.214668	-1.53866	1	13	2	0.0115607	173	2584	3772179261628	primo-1,CG31469
	dme04310	Wnt signaling pathway	0.233073	-1.4564	1	88	8	0.0462428	173	2584	4.28714e+39	Apc2,Rho1,skpB,sina,CkIalpha,dm,dco,por
	ko04310	Wnt signaling pathway	0.233073	-1.4564	1	88	8	0.0462428	173	2584	4.28714e+39	Apc2,Rho1,skpB,sina,CkIalpha,dm,dco,por
	ko00981	Insect hormone biosynthesis	0.24009	-1.42674	1	14	2	0.0115607	173	2584	3718145282	Jheh2,dib
	dme00981	Insect hormone biosynthesis	0.24009	-1.42674	1	14	2	0.0115607	173	2584	3718145282	Jheh2,dib
	M00089	Triacylglycerol biosynthesis	0.24009	-1.42674	1	14	2	0.0115607	173	2584	3785240672	CG3209,CG12746
	dme_M00089	Triacylglycerol biosynthesis	0.24009	-1.42674	1	14	2	0.0115607	173	2584	3785240672	CG3209,CG12746
	M00083	Fatty acid biosynthesis, elongation	0.242214	-1.41793	1	4	1	0.00578035	173	2584	40692	CG12170
	dme_M00083	Fatty acid biosynthesis, elongation	0.242214	-1.41793	1	4	1	0.00578035	173	2584	40692	CG12170
	dme_M00118	Glutathione biosynthesis, glutamate => glutathione	0.242214	-1.41793	1	4	1	0.00578035	173	2584	53581	Gclc
	M00118	Glutathione biosynthesis, glutamate => glutathione	0.242214	-1.41793	1	4	1	0.00578035	173	2584	53581	Gclc
	M00177	Ribosome, eukaryotes	0.242519	-1.41668	1	89	8	0.0462428	173	2584	3.72354e+39	RpL11,RpL31,RpL7-like,RpS3A,RpS13,RpL6,RpL23A,RpL21
	dme_M00177	Ribosome, eukaryotes	0.242519	-1.41668	1	89	8	0.0462428	173	2584	3.72354e+39	RpL11,RpL31,RpL7-like,RpS3A,RpS13,RpL6,RpL23A,RpL21
	ko00600	Sphingolipid metabolism	0.287829	-1.24539	1	28	3	0.017341	173	2584	406724064034835	CG12746,Cerk,CG33090
	dme00600	Sphingolipid metabolism	0.287829	-1.24539	1	28	3	0.017341	173	2584	406724064034835	CG12746,Cerk,CG33090
	M00409	ESCRT-I complex	0.293027	-1.22749	1	5	1	0.00578035	173	2584	31006	mod(r)
	dme_M00409	ESCRT-I complex	0.293027	-1.22749	1	5	1	0.00578035	173	2584	31006	mod(r)
	M00405	THC complex	0.293027	-1.22749	1	5	1	0.00578035	173	2584	40723	Hpr1
	dme_M00128	Ubiquinone biosynthesis, eukaryotes, 4-hydroxybenzoate => ubiquinone	0.293027	-1.22749	1	5	1	0.00578035	173	2584	32272	CG2453
	dme_M00405	THC complex	0.293027	-1.22749	1	5	1	0.00578035	173	2584	40723	Hpr1
	M00128	Ubiquinone biosynthesis, eukaryotes, 4-hydroxybenzoate => ubiquinone	0.293027	-1.22749	1	5	1	0.00578035	173	2584	32272	CG2453
	dme_M00430	Exon junction complex (EJC)	0.316651	-1.14996	1	17	2	0.0115607	173	2584	574012237792	CG34334,Upf3
	dme01040	Biosynthesis of unsaturated fatty acids	0.316651	-1.14996	1	17	2	0.0115607	173	2584	3521337028	CG17544,CG5009
	M00430	Exon junction complex (EJC)	0.316651	-1.14996	1	17	2	0.0115607	173	2584	574012237792	CG34334,Upf3
	ko01040	Biosynthesis of unsaturated fatty acids	0.316651	-1.14996	1	17	2	0.0115607	173	2584	3521337028	CG17544,CG5009
	ko04120	Ubiquitin mediated proteolysis	0.332356	-1.10155	1	98	8	0.0462428	173	2584	3.17464e+39	Traf6,skpB,sina,abo,morgue,Uba2,CG7220,APC4
	dme04120	Ubiquitin mediated proteolysis	0.332356	-1.10155	1	98	8	0.0462428	173	2584	3.17464e+39	Traf6,skpB,sina,abo,morgue,Uba2,CG7220,APC4
	dme00561	Glycerolipid metabolism	0.339866	-1.07921	1	44	4	0.0231214	173	2584	4.02434e+19	CG5665,CG3209,CG12746,CG9886
	ko00561	Glycerolipid metabolism	0.339866	-1.07921	1	44	4	0.0231214	173	2584	4.02434e+19	CG5665,CG3209,CG12746,CG9886
	dme_M00092	Phosphatidylethanolamine (PE) biosynthesis, ethanolamine => PE	0.340451	-1.07748	1	6	1	0.00578035	173	2584	32585	eas
	M00092	Phosphatidylethanolamine (PE) biosynthesis, ethanolamine => PE	0.340451	-1.07748	1	6	1	0.00578035	173	2584	32585	eas
	M00052	Pyrimidine ribonucleotide biosynthesis, UMP => UDP/UTP,CDP/CTP	0.340451	-1.07748	1	6	1	0.00578035	173	2584	41174	nmdyn-D7
	ko00061	Fatty acid biosynthesis	0.340451	-1.07748	1	6	1	0.00578035	173	2584	40692	CG12170
	dme00061	Fatty acid biosynthesis	0.340451	-1.07748	1	6	1	0.00578035	173	2584	40692	CG12170
	dme_M00052	Pyrimidine ribonucleotide biosynthesis, UMP => UDP/UTP,CDP/CTP	0.340451	-1.07748	1	6	1	0.00578035	173	2584	41174	nmdyn-D7
	dme04013	MAPK signaling pathway - fly	0.341887	-1.07328	1	18	2	0.0115607	173	2584	4256436497	tsl,drk
	ko04013	MAPK signaling pathway - fly	0.341887	-1.07328	1	18	2	0.0115607	173	2584	4256436497	tsl,drk
	dme00280	Valine, leucine and isoleucine degradation	0.344367	-1.06605	1	31	3	0.017341	173	2584	4.37503e+16	CG2118,CG17691,CG10399
	ko00280	Valine, leucine and isoleucine degradation	0.344367	-1.06605	1	31	3	0.017341	173	2584	4.37503e+16	CG2118,CG17691,CG10399
	M00352	Spliceosome, U2-snRNP	0.366827	-1.00287	1	19	2	0.0115607	173	2584	4067842048	noi,CG16941
	dme_M00352	Spliceosome, U2-snRNP	0.366827	-1.00287	1	19	2	0.0115607	173	2584	4067842048	noi,CG16941
	ko04145	Phagosome	0.375363	-0.979861	1	74	6	0.0346821	173	2584	4.22163e+29	Vha100-2,Act5C,Syx18,Rab7,Syx7,sw
	dme04145	Phagosome	0.375363	-0.979861	1	74	6	0.0346821	173	2584	4.22163e+29	Vha100-2,Act5C,Syx18,Rab7,Syx7,sw
	dme00230	Purine metabolism	0.38018	-0.967111	1	131	10	0.0578035	173	2584	3.77234e+51	CG33785,nmdyn-D7,RpII18,CG3756,CG11337,Rpb8,CG11883,ade2,RpII140,RnrS
	ko00230	Purine metabolism	0.38018	-0.967111	1	131	10	0.0578035	173	2584	3.77234e+51	CG33785,nmdyn-D7,RpII18,CG3756,CG11337,Rpb8,CG11883,ade2,RpII140,RnrS
	dme_M00427	Nuclear pore complex	0.381928	-0.962524	1	33	3	0.017341	173	2584	415623746742209	mbo,Rae1,Nup43
	M00427	Nuclear pore complex	0.381928	-0.962524	1	33	3	0.017341	173	2584	415623746742209	mbo,Rae1,Nup43
	dme00072	Synthesis and degradation of ketone bodies	0.384711	-0.955263	1	7	1	0.00578035	173	2584	33978	CG10399
	M00048	Inosine monophosphate biosynthesis, PRPP + glutamine => IMP	0.384711	-0.955263	1	7	1	0.00578035	173	2584	33847	ade2
	dme_M00048	Inosine monophosphate biosynthesis, PRPP + glutamine => IMP	0.384711	-0.955263	1	7	1	0.00578035	173	2584	33847	ade2
	ko00072	Synthesis and degradation of ketone bodies	0.384711	-0.955263	1	7	1	0.00578035	173	2584	33978	CG10399
	dme03440	Homologous recombination	0.391397	-0.938032	1	20	2	0.0115607	173	2584	3104434565	mus81,mre11
	ko03440	Homologous recombination	0.391397	-0.938032	1	20	2	0.0115607	173	2584	3104434565	mus81,mre11
	dme00340	Histidine metabolism	0.426017	-0.853277	1	8	1	0.00578035	173	2584	45398	Aldh-III
	M00549	Nucleotide sugar biosynthesis, glucose => UDP-glucose	0.426017	-0.853277	1	8	1	0.00578035	173	2584	39065	UGP
	M00412	ESCRT-III complex	0.426017	-0.853277	1	8	1	0.00578035	173	2584	40250	CG5498
	dme_M00412	ESCRT-III complex	0.426017	-0.853277	1	8	1	0.00578035	173	2584	40250	CG5498
	dme_M00549	Nucleotide sugar biosynthesis, glucose => UDP-glucose	0.426017	-0.853277	1	8	1	0.00578035	173	2584	39065	UGP
	ko00340	Histidine metabolism	0.426017	-0.853277	1	8	1	0.00578035	173	2584	45398	Aldh-III
	dme04330	Notch signaling pathway	0.439191	-0.822821	1	22	2	0.0115607	173	2584	31589251430	dx,pen-2
	ko04330	Notch signaling pathway	0.439191	-0.822821	1	22	2	0.0115607	173	2584	31589251430	dx,pen-2
	ko03013	RNA transport	0.4551	-0.787238	1	139	10	0.0578035	173	2584	5.74012e+52	CG34334,Rae1,Nup43,Gem2,wibg,mbo,Hpr1,Upf3,wmd,CG33082
	dme03013	RNA transport	0.4551	-0.787238	1	139	10	0.0578035	173	2584	5.74012e+52	CG34334,Rae1,Nup43,Gem2,wibg,mbo,Hpr1,Upf3,wmd,CG33082
	ko00565	Ether lipid metabolism	0.462318	-0.771502	1	23	2	0.0115607	173	2584	4067236791	CG12746,Lis-1
	dme00565	Ether lipid metabolism	0.462318	-0.771502	1	23	2	0.0115607	173	2584	4067236791	CG12746,Lis-1
	ko00130	Ubiquinone and other terpenoid-quinone biosynthesis	0.464564	-0.766655	1	9	1	0.00578035	173	2584	32272	CG2453
	dme04711	Circadian rhythm - fly	0.464564	-0.766655	1	9	1	0.00578035	173	2584	43673	dco
	dme00130	Ubiquinone and other terpenoid-quinone biosynthesis	0.464564	-0.766655	1	9	1	0.00578035	173	2584	32272	CG2453
	M00406	TREX complex	0.464564	-0.766655	1	9	1	0.00578035	173	2584	40723	Hpr1
	ko04122	Sulfur relay system	0.464564	-0.766655	1	9	1	0.00578035	173	2584	35920	CG8078
	M00391	Exosome, eukaryotes	0.464564	-0.766655	1	9	1	0.00578035	173	2584	32665	Rrp45
	dme_M00391	Exosome, eukaryotes	0.464564	-0.766655	1	9	1	0.00578035	173	2584	32665	Rrp45
	dme04122	Sulfur relay system	0.464564	-0.766655	1	9	1	0.00578035	173	2584	35920	CG8078
	dme_M00406	TREX complex	0.464564	-0.766655	1	9	1	0.00578035	173	2584	40723	Hpr1
	ko03018	RNA degradation	0.478937	-0.736186	1	53	4	0.0231214	173	2584	3.26654e+19	Rrp45,CG11337,CG2091,Ge-1
	dme03018	RNA degradation	0.478937	-0.736186	1	53	4	0.0231214	173	2584	3.26654e+19	Rrp45,CG11337,CG2091,Ge-1
	ko03420	Nucleotide excision repair	0.490719	-0.711884	1	39	3	0.017341	173	2584	392023525736598	hay,CG10262,Tfb1
	dme03420	Nucleotide excision repair	0.490719	-0.711884	1	39	3	0.017341	173	2584	392023525736598	hay,CG10262,Tfb1
	dme00360	Phenylalanine metabolism	0.500537	-0.692073	1	10	1	0.00578035	173	2584	45398	Aldh-III
	ko00360	Phenylalanine metabolism	0.500537	-0.692073	1	10	1	0.00578035	173	2584	45398	Aldh-III
	ko01212	Fatty acid metabolism	0.524944	-0.644464	1	41	3	0.017341	173	2584	406923521337028	CG12170,CG17544,CG5009
	dme01212	Fatty acid metabolism	0.524944	-0.644464	1	41	3	0.017341	173	2584	406923521337028	CG12170,CG17544,CG5009
	dme_M00380	SCF-BTRC complex	0.534107	-0.62716	1	11	1	0.00578035	173	2584	36298	skpB
	M00387	SCF-FBW7 complex	0.534107	-0.62716	1	11	1	0.00578035	173	2584	36298	skpB
	M00380	SCF-BTRC complex	0.534107	-0.62716	1	11	1	0.00578035	173	2584	36298	skpB
	dme_M00381	SCF-SKP2 complex	0.534107	-0.62716	1	11	1	0.00578035	173	2584	36298	skpB
	M00381	SCF-SKP2 complex	0.534107	-0.62716	1	11	1	0.00578035	173	2584	36298	skpB
	dme_M00387	SCF-FBW7 complex	0.534107	-0.62716	1	11	1	0.00578035	173	2584	36298	skpB
	dme04745	Phototransduction - fly	0.54894	-0.599765	1	27	2	0.0115607	173	2584	315213355013	Act5C,Gprk1
	ko04745	Phototransduction - fly	0.54894	-0.599765	1	27	2	0.0115607	173	2584	315213355013	Act5C,Gprk1
	dme00670	One carbon pool by folate	0.565432	-0.570166	1	12	1	0.00578035	173	2584	37699	CG34424
	ko00670	One carbon pool by folate	0.565432	-0.570166	1	12	1	0.00578035	173	2584	37699	CG34424
	ko00520	Amino sugar and nucleotide sugar metabolism	0.589428	-0.528602	1	45	3	0.017341	173	2584	390653891133026	UGP,CG7979,CG17065
	dme00520	Amino sugar and nucleotide sugar metabolism	0.589428	-0.528602	1	45	3	0.017341	173	2584	390653891133026	UGP,CG7979,CG17065
	dme_M00055	N-glycan precursor biosynthesis	0.594662	-0.519762	1	13	1	0.00578035	173	2584	37754	l(2)not
	M00055	N-glycan precursor biosynthesis	0.594662	-0.519762	1	13	1	0.00578035	173	2584	37754	l(2)not
	dme_M00050	Guanine ribonucleotide biosynthesis IMP => GDP,GTP	0.594662	-0.519762	1	13	1	0.00578035	173	2584	41174	nmdyn-D7
	M00050	Guanine ribonucleotide biosynthesis IMP => GDP,GTP	0.594662	-0.519762	1	13	1	0.00578035	173	2584	41174	nmdyn-D7
	dme00071	Fatty acid degradation	0.607245	-0.498824	1	30	2	0.0115607	173	2584	3521337028	CG17544,CG5009
	ko00071	Fatty acid degradation	0.607245	-0.498824	1	30	2	0.0115607	173	2584	3521337028	CG17544,CG5009
	dme_M00003	Gluconeogenesis, oxaloacetate => fructose-6P	0.621937	-0.474917	1	14	1	0.00578035	173	2584	33459	CG9961
	M00003	Gluconeogenesis, oxaloacetate => fructose-6P	0.621937	-0.474917	1	14	1	0.00578035	173	2584	33459	CG9961
	M00049	Adenine ribonucleotide biosynthesis, IMP => ADP,ATP	0.647386	-0.434812	1	15	1	0.00578035	173	2584	41174	nmdyn-D7
	M00389	APC/C complex	0.647386	-0.434812	1	15	1	0.00578035	173	2584	31835	APC4
	dme_M00389	APC/C complex	0.647386	-0.434812	1	15	1	0.00578035	173	2584	31835	APC4
	dme_M00002	Glycolysis, core module involving three-carbon compounds	0.647386	-0.434812	1	15	1	0.00578035	173	2584	33459	CG9961
	dme_M00049	Adenine ribonucleotide biosynthesis, IMP => ADP,ATP	0.647386	-0.434812	1	15	1	0.00578035	173	2584	41174	nmdyn-D7
	M00002	Glycolysis, core module involving three-carbon compounds	0.647386	-0.434812	1	15	1	0.00578035	173	2584	33459	CG9961
	ko03010	Ribosome	0.661761	-0.412851	1	131	8	0.0462428	173	2584	3.72354e+39	RpL11,RpL31,RpL7-like,RpS3A,RpS13,RpL6,RpL23A,RpL21
	dme03010	Ribosome	0.661761	-0.412851	1	131	8	0.0462428	173	2584	3.72354e+39	RpL11,RpL31,RpL7-like,RpS3A,RpS13,RpL6,RpL23A,RpL21
	M00353	Spliceosome, Prp19/CDC5L complex	0.693287	-0.366312	1	17	1	0.00578035	173	2584	41068	CG11964
	dme_M00353	Spliceosome, Prp19/CDC5L complex	0.693287	-0.366312	1	17	1	0.00578035	173	2584	41068	CG11964
	dme00910	Nitrogen metabolism	0.693287	-0.366312	1	17	1	0.00578035	173	2584	42625	CG5379
	ko00910	Nitrogen metabolism	0.693287	-0.366312	1	17	1	0.00578035	173	2584	42625	CG5379
	ko00650	Butanoate metabolism	0.693287	-0.366312	1	17	1	0.00578035	173	2584	33978	CG10399
	dme00650	Butanoate metabolism	0.693287	-0.366312	1	17	1	0.00578035	173	2584	33978	CG10399
	M00359	Aminoacyl-tRNA biosynthesis, eukaryotes	0.706402	-0.34757	1	36	2	0.0115607	173	2584	3982841862	CG4573,Aats-ser
	ko00562	Inositol phosphate metabolism	0.706402	-0.34757	1	36	2	0.0115607	173	2584	3736031544	Ipk1,Mipp2
	dme_M00359	Aminoacyl-tRNA biosynthesis, eukaryotes	0.706402	-0.34757	1	36	2	0.0115607	173	2584	3982841862	CG4573,Aats-ser
	dme00562	Inositol phosphate metabolism	0.706402	-0.34757	1	36	2	0.0115607	173	2584	3736031544	Ipk1,Mipp2
	ko00350	Tyrosine metabolism	0.713957	-0.336932	1	18	1	0.00578035	173	2584	45398	Aldh-III
	ko04140	Regulation of autophagy	0.713957	-0.336932	1	18	1	0.00578035	173	2584	32001	Atg8a
	dme00350	Tyrosine metabolism	0.713957	-0.336932	1	18	1	0.00578035	173	2584	45398	Aldh-III
	dme04140	Regulation of autophagy	0.713957	-0.336932	1	18	1	0.00578035	173	2584	32001	Atg8a
	dme00410	beta-Alanine metabolism	0.713957	-0.336932	1	18	1	0.00578035	173	2584	45398	Aldh-III
	ko00410	beta-Alanine metabolism	0.713957	-0.336932	1	18	1	0.00578035	173	2584	45398	Aldh-III
	ko00510	N-Glycan biosynthesis	0.720748	-0.327465	1	37	2	0.0115607	173	2584	3148937754	CG3149,l(2)not
	dme00510	N-Glycan biosynthesis	0.720748	-0.327465	1	37	2	0.0115607	173	2584	3148937754	CG3149,l(2)not
	ko00380	Tryptophan metabolism	0.733242	-0.310279	1	19	1	0.00578035	173	2584	37867	Dat
	dme00380	Tryptophan metabolism	0.733242	-0.310279	1	19	1	0.00578035	173	2584	37867	Dat
	dme03410	Base excision repair	0.751234	-0.286038	1	20	1	0.00578035	173	2584	35257	CG10262
	ko03410	Base excision repair	0.751234	-0.286038	1	20	1	0.00578035	173	2584	35257	CG10262
	dme00640	Propanoate metabolism	0.751234	-0.286038	1	20	1	0.00578035	173	2584	44001	Sucb
	ko00640	Propanoate metabolism	0.751234	-0.286038	1	20	1	0.00578035	173	2584	44001	Sucb
	dme00564	Glycerophospholipid metabolism	0.757604	-0.277594	1	58	3	0.017341	173	2584	325853785240672	eas,CG3209,CG12746
	ko00564	Glycerophospholipid metabolism	0.757604	-0.277594	1	58	3	0.017341	173	2584	325853785240672	eas,CG3209,CG12746
	M00355	Spliceosome, 35S U5-snRNP	0.760296	-0.274048	1	40	2	0.0115607	173	2584	3806936984	Cypl,cyp33
	dme_M00355	Spliceosome, 35S U5-snRNP	0.760296	-0.274048	1	40	2	0.0115607	173	2584	3806936984	Cypl,cyp33
	dme00970	Aminoacyl-tRNA biosynthesis	0.783904	-0.243468	1	42	2	0.0115607	173	2584	3982841862	CG4573,Aats-ser
	ko00970	Aminoacyl-tRNA biosynthesis	0.783904	-0.243468	1	42	2	0.0115607	173	2584	3982841862	CG4573,Aats-ser
	M00011	Citrate cycle, second carbon oxidation, 2-oxoglutarate => oxaloacetate	0.798285	-0.22529	1	23	1	0.00578035	173	2584	44001	Sucb
	dme_M00011	Citrate cycle, second carbon oxidation, 2-oxoglutarate => oxaloacetate	0.798285	-0.22529	1	23	1	0.00578035	173	2584	44001	Sucb
	ko00030	Pentose phosphate pathway	0.798285	-0.22529	1	23	1	0.00578035	173	2584	36358	CG8525
	dme00030	Pentose phosphate pathway	0.798285	-0.22529	1	23	1	0.00578035	173	2584	36358	CG8525
	ko04080	Neuroactive ligand-receptor interaction	0.805458	-0.216344	1	44	2	0.0115607	173	2584	3255443098	Lcch3,Lgr3
	dme04080	Neuroactive ligand-receptor interaction	0.805458	-0.216344	1	44	2	0.0115607	173	2584	3255443098	Lcch3,Lgr3
	M00001	Glycolysis (Embden-Meyerhof pathway), glucose => pyruvate	0.811911	-0.208364	1	24	1	0.00578035	173	2584	33459	CG9961
	dme00630	Glyoxylate and dicarboxylate metabolism	0.811911	-0.208364	1	24	1	0.00578035	173	2584	33431	CG9886
	ko00630	Glyoxylate and dicarboxylate metabolism	0.811911	-0.208364	1	24	1	0.00578035	173	2584	33431	CG9886
	dme_M00001	Glycolysis (Embden-Meyerhof pathway), glucose => pyruvate	0.811911	-0.208364	1	24	1	0.00578035	173	2584	33459	CG9961
	dme_M00340	Proteasome, 20S core particle	0.824622	-0.19283	1	25	1	0.00578035	173	2584	41079	Prosbeta3
	M00340	Proteasome, 20S core particle	0.824622	-0.19283	1	25	1	0.00578035	173	2584	41079	Prosbeta3
	ko00983	Drug metabolism - other enzymes	0.834227	-0.181249	1	47	2	0.0115607	173	2584	3939337644	Est-P,CG3788
	dme00983	Drug metabolism - other enzymes	0.834227	-0.181249	1	47	2	0.0115607	173	2584	3939337644	Est-P,CG3788
	ko04320	Dorso-ventral axis formation	0.847537	-0.16542	1	27	1	0.00578035	173	2584	36497	drk
	dme04320	Dorso-ventral axis formation	0.847537	-0.16542	1	27	1	0.00578035	173	2584	36497	drk
	ko00260	Glycine, serine and threonine metabolism	0.857852	-0.153323	1	28	1	0.00578035	173	2584	33431	CG9886
	dme00260	Glycine, serine and threonine metabolism	0.857852	-0.153323	1	28	1	0.00578035	173	2584	33431	CG9886
	ko00010	Glycolysis / Gluconeogenesis	0.866631	-0.143142	1	51	2	0.0115607	173	2584	4539833459	Aldh-III,CG9961
	dme00010	Glycolysis / Gluconeogenesis	0.866631	-0.143142	1	51	2	0.0115607	173	2584	4539833459	Aldh-III,CG9961
	M00354	Spliceosome, U4/U6.U5 tri-snRNP	0.876447	-0.131879	1	30	1	0.00578035	173	2584	39955	U4-U6-60K
	dme_M00354	Spliceosome, U4/U6.U5 tri-snRNP	0.876447	-0.131879	1	30	1	0.00578035	173	2584	39955	U4-U6-60K
	dme_M00160	V-type ATPase, eukaryotes	0.884816	-0.122375	1	31	1	0.00578035	173	2584	42216	Vha100-2
	M00160	V-type ATPase, eukaryotes	0.884816	-0.122375	1	31	1	0.00578035	173	2584	42216	Vha100-2
	ko00052	Galactose metabolism	0.913019	-0.0909981	1	35	1	0.00578035	173	2584	39065	UGP
	M00009	Citrate cycle (TCA cycle, Krebs cycle)	0.913019	-0.0909981	1	35	1	0.00578035	173	2584	44001	Sucb
	dme00052	Galactose metabolism	0.913019	-0.0909981	1	35	1	0.00578035	173	2584	39065	UGP
	dme_M00009	Citrate cycle (TCA cycle, Krebs cycle)	0.913019	-0.0909981	1	35	1	0.00578035	173	2584	44001	Sucb
	ko03030	DNA replication	0.913019	-0.0909981	1	35	1	0.00578035	173	2584	35257	CG10262
	dme03030	DNA replication	0.913019	-0.0909981	1	35	1	0.00578035	173	2584	35257	CG10262
	ko04150	mTOR signaling pathway	0.918923	-0.0845532	1	36	1	0.00578035	173	2584	41957	Akt1
	dme04150	mTOR signaling pathway	0.918923	-0.0845532	1	36	1	0.00578035	173	2584	41957	Akt1
	ko00500	Starch and sucrose metabolism	0.919453	-0.0839765	1	60	2	0.0115607	173	2584	3906538911	UGP,CG7979
	dme00500	Starch and sucrose metabolism	0.919453	-0.0839765	1	60	2	0.0115607	173	2584	3906538911	UGP,CG7979
	dme00480	Glutathione metabolism	0.932188	-0.0702213	1	63	2	0.0115607	173	2584	5358136280	Gclc,RnrS
	ko00480	Glutathione metabolism	0.932188	-0.0702213	1	63	2	0.0115607	173	2584	5358136280	Gclc,RnrS
	ko04141	Protein processing in endoplasmic reticulum	0.93434	-0.0679148	1	126	5	0.0289017	173	2584	4.37094e+24	Gcn2,skpB,CG7945,Atf6,morgue
	dme04141	Protein processing in endoplasmic reticulum	0.93434	-0.0679148	1	126	5	0.0289017	173	2584	4.37094e+24	Gcn2,skpB,CG7945,Atf6,morgue
	dme01230	Biosynthesis of amino acids	0.935994	-0.0661464	1	64	2	0.0115607	173	2584	4228433459	P5cr,CG9961
	ko01230	Biosynthesis of amino acids	0.935994	-0.0661464	1	64	2	0.0115607	173	2584	4228433459	P5cr,CG9961
	ko04070	Phosphatidylinositol signaling system	0.942971	-0.0587197	1	41	1	0.00578035	173	2584	37360	Ipk1
	dme04070	Phosphatidylinositol signaling system	0.942971	-0.0587197	1	41	1	0.00578035	173	2584	37360	Ipk1
	dme04142	Lysosome	0.947984	-0.0534177	1	90	3	0.017341	173	2584	359894221643943	CG1827,Vha100-2,or
	ko04142	Lysosome	0.947984	-0.0534177	1	90	3	0.017341	173	2584	359894221643943	CG1827,Vha100-2,or
	dme00860	Porphyrin and chlorophyll metabolism	0.950468	-0.0508009	1	43	1	0.00578035	173	2584	39828	CG4573
	ko00860	Porphyrin and chlorophyll metabolism	0.950468	-0.0508009	1	43	1	0.00578035	173	2584	39828	CG4573
	ko00020	Citrate cycle (TCA cycle)	0.950468	-0.0508009	1	43	1	0.00578035	173	2584	44001	Sucb
	dme00020	Citrate cycle (TCA cycle)	0.950468	-0.0508009	1	43	1	0.00578035	173	2584	44001	Sucb
	ko00040	Pentose and glucuronate interconversions	0.956984	-0.0439684	1	45	1	0.00578035	173	2584	39065	UGP
	dme00040	Pentose and glucuronate interconversions	0.956984	-0.0439684	1	45	1	0.00578035	173	2584	39065	UGP
	dme03050	Proteasome	0.969782	-0.0306838	1	50	1	0.00578035	173	2584	41079	Prosbeta3
	ko03050	Proteasome	0.969782	-0.0306838	1	50	1	0.00578035	173	2584	41079	Prosbeta3
	dme00620	Pyruvate metabolism	0.969782	-0.0306838	1	50	1	0.00578035	173	2584	36556	CG18371
	ko00620	Pyruvate metabolism	0.969782	-0.0306838	1	50	1	0.00578035	173	2584	36556	CG18371
	dme00330	Arginine and proline metabolism	0.97556	-0.0247432	1	53	1	0.00578035	173	2584	42284	P5cr
	ko00330	Arginine and proline metabolism	0.97556	-0.0247432	1	53	1	0.00578035	173	2584	42284	P5cr
	dme03008	Ribosome biogenesis in eukaryotes	0.982793	-0.017357	1	86	2	0.0115607	173	2584	3601942811	CG1671,CG10214
	ko03008	Ribosome biogenesis in eukaryotes	0.982793	-0.017357	1	86	2	0.0115607	173	2584	3601942811	CG1671,CG10214
	ko00982	Drug metabolism - cytochrome P450	0.987091	-0.0129934	1	62	1	0.00578035	173	2584	45398	Aldh-III
	dme00980	Metabolism of xenobiotics by cytochrome P450	0.987091	-0.0129934	1	62	1	0.00578035	173	2584	45398	Aldh-III
	ko00980	Metabolism of xenobiotics by cytochrome P450	0.987091	-0.0129934	1	62	1	0.00578035	173	2584	45398	Aldh-III
	dme00982	Drug metabolism - cytochrome P450	0.987091	-0.0129934	1	62	1	0.00578035	173	2584	45398	Aldh-III
	ko01200	Carbon metabolism	0.994748	-0.00526628	1	105	2	0.0115607	173	2584	4400133459	Sucb,CG9961
	dme01200	Carbon metabolism	0.994748	-0.00526628	1	105	2	0.0115607	173	2584	4400133459	Sucb,CG9961
	dme00190	Oxidative phosphorylation	0.999871	-0.000128747	1	126	1	0.00578035	173	2584	42216	Vha100-2
	ko00190	Oxidative phosphorylation	0.999871	-0.000128747	1	126	1	0.00578035	173	2584	42216	Vha100-2
	dme_M00007	Pentose phosphate pathway, non-oxidative phase, fructose 6P => ribose 5P	1	-5.1378e-12	1	5	0	0	173	2584
	M00073	N-glycan precursor trimming	1	-5.1378e-12	1	5	0	0	173	2584
	M00082	Fatty acid biosynthesis, initiation	1	-5.1378e-12	1	5	0	0	173	2584
	M00307	Pyruvate oxidation, pyruvate => acetyl-CoA	1	-5.1378e-12	1	5	0	0	173	2584
	dme_M00082	Fatty acid biosynthesis, initiation	1	-5.1378e-12	1	5	0	0	173	2584
	dme_M00415	Fatty acid biosynthesis, elongation, endoplasmic reticulum	1	-5.1378e-12	1	5	0	0	173	2584
	M00094	Ceramide biosynthesis	1	-5.1378e-12	1	5	0	0	173	2584
	M00415	Fatty acid biosynthesis, elongation, endoplasmic reticulum	1	-5.1378e-12	1	5	0	0	173	2584
	M00006	Pentose phosphate pathway, oxidative phase, glucose 6P => ribulose 5P	1	-5.1378e-12	1	5	0	0	173	2584
	dme_M00307	Pyruvate oxidation, pyruvate => acetyl-CoA	1	-5.1378e-12	1	5	0	0	173	2584
	dme_M00006	Pentose phosphate pathway, oxidative phase, glucose 6P => ribulose 5P	1	-5.1378e-12	1	5	0	0	173	2584
	M00007	Pentose phosphate pathway, non-oxidative phase, fructose 6P => ribose 5P	1	-5.1378e-12	1	5	0	0	173	2584
	M00289	RF-C complex	1	-5.1378e-12	1	5	0	0	173	2584
	M00085	Fatty acid biosynthesis, elongation, mitochondria	1	-5.1378e-12	1	5	0	0	173	2584
	M00013	Malonate semialdehyde pathway, propanoyl-CoA => Acetyl-CoA	1	-5.1378e-12	1	5	0	0	173	2584
	dme_M00013	Malonate semialdehyde pathway, propanoyl-CoA => Acetyl-CoA	1	-5.1378e-12	1	5	0	0	173	2584
	M00395	Decapping complex	1	-5.1378e-12	1	5	0	0	173	2584
	dme_M00094	Ceramide biosynthesis	1	-5.1378e-12	1	5	0	0	173	2584
	dme_M00085	Fatty acid biosynthesis, elongation, mitochondria	1	-5.1378e-12	1	5	0	0	173	2584
	dme_M00073	N-glycan precursor trimming	1	-5.1378e-12	1	5	0	0	173	2584
	dme_M00395	Decapping complex	1	-5.1378e-12	1	5	0	0	173	2584
	dme_M00289	RF-C complex	1	-5.1378e-12	1	5	0	0	173	2584
	M00400	p97-Ufd1-Npl4 complex	1	-4.10642e-12	1	3	0	0	173	2584
	ko00785	Lipoic acid metabolism	1	-4.10642e-12	1	3	0	0	173	2584
	dme_M00288	RPA complex	1	-4.10642e-12	1	3	0	0	173	2584
	dme_M00058	Glycosaminoglycan biosynthesis, chondroitin sulfate backbone	1	-4.10642e-12	1	3	0	0	173	2584
	M00288	RPA complex	1	-4.10642e-12	1	3	0	0	173	2584
	dme_M00151	Cytochrome bc1 complex respiratory unit	1	-4.10642e-12	1	3	0	0	173	2584
	M00141	C1-unit interconversion, eukaryotes	1	-4.10642e-12	1	3	0	0	173	2584
	M00399	Cap binding complex	1	-4.10642e-12	1	3	0	0	173	2584
	dme_M00400	p97-Ufd1-Npl4 complex	1	-4.10642e-12	1	3	0	0	173	2584
	dme00785	Lipoic acid metabolism	1	-4.10642e-12	1	3	0	0	173	2584
	M00046	Pyrimidine degradation, uracil => beta-alanine, thymine => 3-aminoisobutanoate	1	-4.10642e-12	1	3	0	0	173	2584
	dme_M00134	Polyamine biosynthesis, arginine => ornithine => putrescine	1	-4.10642e-12	1	3	0	0	173	2584
	dme_M00399	Cap binding complex	1	-4.10642e-12	1	3	0	0	173	2584
	M00151	Cytochrome bc1 complex respiratory unit	1	-4.10642e-12	1	3	0	0	173	2584
	M00058	Glycosaminoglycan biosynthesis, chondroitin sulfate backbone	1	-4.10642e-12	1	3	0	0	173	2584
	dme_M00086	beta-Oxidation, acyl-CoA synthesis	1	-4.10642e-12	1	3	0	0	173	2584
	dme_M00046	Pyrimidine degradation, uracil => beta-alanine, thymine => 3-aminoisobutanoate	1	-4.10642e-12	1	3	0	0	173	2584
	M00392	Ski complex	1	-4.10642e-12	1	3	0	0	173	2584
	M00410	ESCRT-II complex	1	-4.10642e-12	1	3	0	0	173	2584
	ko01220	Degradation of aromatic compounds	1	-4.10642e-12	1	3	0	0	173	2584
	dme01220	Degradation of aromatic compounds	1	-4.10642e-12	1	3	0	0	173	2584
	M00051	Uridine monophosphate biosynthesis, glutamine (+ PRPP) => UMP	1	-4.10642e-12	1	3	0	0	173	2584
	M00134	Polyamine biosynthesis, arginine => ornithine => putrescine	1	-4.10642e-12	1	3	0	0	173	2584
	dme_M00020	Serine biosynthesis, glycerate-3P => serine	1	-4.10642e-12	1	3	0	0	173	2584
	dme_M00141	C1-unit interconversion, eukaryotes	1	-4.10642e-12	1	3	0	0	173	2584
	dme_M00410	ESCRT-II complex	1	-4.10642e-12	1	3	0	0	173	2584
	dme00471	D-Glutamine and D-glutamate metabolism	1	-4.10642e-12	1	3	0	0	173	2584
	M00020	Serine biosynthesis, glycerate-3P => serine	1	-4.10642e-12	1	3	0	0	173	2584
	ko00460	Cyanoamino acid metabolism	1	-4.10642e-12	1	3	0	0	173	2584
	M00086	beta-Oxidation, acyl-CoA synthesis	1	-4.10642e-12	1	3	0	0	173	2584
	dme_M00392	Ski complex	1	-4.10642e-12	1	3	0	0	173	2584
	dme_M00051	Uridine monophosphate biosynthesis, glutamine (+ PRPP) => UMP	1	-4.10642e-12	1	3	0	0	173	2584
	ko00471	D-Glutamine and D-glutamate metabolism	1	-4.10642e-12	1	3	0	0	173	2584
	dme00460	Cyanoamino acid metabolism	1	-4.10642e-12	1	3	0	0	173	2584
	ko00232	Caffeine metabolism	1	-4.05559e-12	1	2	0	0	173	2584
	ko00290	Valine, leucine and isoleucine biosynthesis	1	-4.05559e-12	1	2	0	0	173	2584
	M00293	DNA polymerase zeta complex	1	-4.05559e-12	1	2	0	0	173	2584
	dme00290	Valine, leucine and isoleucine biosynthesis	1	-4.05559e-12	1	2	0	0	173	2584
	dme00232	Caffeine metabolism	1	-4.05559e-12	1	2	0	0	173	2584
	M00408	ESCRT-0 complex	1	-4.05559e-12	1	2	0	0	173	2584
	dme_M00294	DNA polymerase gamma complex	1	-4.05559e-12	1	2	0	0	173	2584
	dme00100	Steroid biosynthesis	1	-4.05559e-12	1	2	0	0	173	2584
	M00338	Cysteine biosynthesis, homocysteine + serine => cysteine	1	-4.05559e-12	1	2	0	0	173	2584
	dme_M00338	Cysteine biosynthesis, homocysteine + serine => cysteine	1	-4.05559e-12	1	2	0	0	173	2584
	M00100	Sphingosine degradation	1	-4.05559e-12	1	2	0	0	173	2584
	ko00100	Steroid biosynthesis	1	-4.05559e-12	1	2	0	0	173	2584
	M00554	Nucleotide sugar biosynthesis, galactose => UDP-galactose	1	-4.05559e-12	1	2	0	0	173	2584
	dme_M00100	Sphingosine degradation	1	-4.05559e-12	1	2	0	0	173	2584
	dme_M00293	DNA polymerase zeta complex	1	-4.05559e-12	1	2	0	0	173	2584
	dme_M00408	ESCRT-0 complex	1	-4.05559e-12	1	2	0	0	173	2584
	dme_M00554	Nucleotide sugar biosynthesis, galactose => UDP-galactose	1	-4.05559e-12	1	2	0	0	173	2584
	M00294	DNA polymerase gamma complex	1	-4.05559e-12	1	2	0	0	173	2584
	M00384	Cul3-SPOP complex	1	-3.23674e-12	1	4	0	0	173	2584
	dme00400	Phenylalanine, tyrosine and tryptophan biosynthesis	1	-3.23674e-12	1	4	0	0	173	2584
	dme_M00263	DNA polymerase epsilon complex	1	-3.23674e-12	1	4	0	0	173	2584
	dme_M00390	Exosome, archaea	1	-3.23674e-12	1	4	0	0	173	2584
	M00263	DNA polymerase epsilon complex	1	-3.23674e-12	1	4	0	0	173	2584
	M00027	GABA (gamma-Aminobutyrate) shunt	1	-3.23674e-12	1	4	0	0	173	2584
	dme00601	Glycosphingolipid biosynthesis - lacto and neolacto series	1	-3.23674e-12	1	4	0	0	173	2584
	M00402	Translocon-associated protein (TRAP) complex	1	-3.23674e-12	1	4	0	0	173	2584
	dme_M00286	GINS complex	1	-3.23674e-12	1	4	0	0	173	2584
	dme_M00425	H/ACA ribonucleoprotein complex	1	-3.23674e-12	1	4	0	0	173	2584
	ko00533	Glycosaminoglycan biosynthesis - keratan sulfate	1	-3.23674e-12	1	4	0	0	173	2584
	M00401	Sec61 complex	1	-3.23674e-12	1	4	0	0	173	2584
	dme_M00261	DNA polymerase alpha / primase complex	1	-3.23674e-12	1	4	0	0	173	2584
	dme_M00057	Glycosaminoglycan biosynthesis, linkage tetrasaccharide	1	-3.23674e-12	1	4	0	0	173	2584
	ko00400	Phenylalanine, tyrosine and tryptophan biosynthesis	1	-3.23674e-12	1	4	0	0	173	2584
	M00057	Glycosaminoglycan biosynthesis, linkage tetrasaccharide	1	-3.23674e-12	1	4	0	0	173	2584
	dme_M00401	Sec61 complex	1	-3.23674e-12	1	4	0	0	173	2584
	dme00533	Glycosaminoglycan biosynthesis - keratan sulfate	1	-3.23674e-12	1	4	0	0	173	2584
	M00286	GINS complex	1	-3.23674e-12	1	4	0	0	173	2584
	M00425	H/ACA ribonucleoprotein complex	1	-3.23674e-12	1	4	0	0	173	2584
	dme_M00384	Cul3-SPOP complex	1	-3.23674e-12	1	4	0	0	173	2584
	ko00601	Glycosphingolipid biosynthesis - lacto and neolacto series	1	-3.23674e-12	1	4	0	0	173	2584
	M00261	DNA polymerase alpha / primase complex	1	-3.23674e-12	1	4	0	0	173	2584
	dme_M00402	Translocon-associated protein (TRAP) complex	1	-3.23674e-12	1	4	0	0	173	2584
	dme_M00027	GABA (gamma-Aminobutyrate) shunt	1	-3.23674e-12	1	4	0	0	173	2584
	M00390	Exosome, archaea	1	-3.23674e-12	1	4	0	0	173	2584
	ko00472	D-Arginine and D-ornithine metabolism	1	-1.74692e-12	1	1	0	0	173	2584
	ko00300	Lysine biosynthesis	1	-1.74692e-12	1	1	0	0	173	2584
	dme00300	Lysine biosynthesis	1	-1.74692e-12	1	1	0	0	173	2584
	M00005	PRPP biosynthesis, ribose 5P => PRPP	1	-1.74692e-12	1	1	0	0	173	2584
	dme_M00005	PRPP biosynthesis, ribose 5P => PRPP	1	-1.74692e-12	1	1	0	0	173	2584
	dme00472	D-Arginine and D-ornithine metabolism	1	-1.74692e-12	1	1	0	0	173	2584
	ko00514	Other types of O-glycan biosynthesis	1	-3.7745e-14	1	12	0	0	173	2584
	dme00514	Other types of O-glycan biosynthesis	1	-3.7745e-14	1	12	0	0	173	2584
	M00010	Citrate cycle, first carbon oxidation, oxaloacetate => 2-oxoglutarate	1	-3.7745e-14	1	12	0	0	173	2584
	dme00062	Fatty acid elongation	1	-3.7745e-14	1	12	0	0	173	2584
	ko00062	Fatty acid elongation	1	-3.7745e-14	1	12	0	0	173	2584
	dme_M00010	Citrate cycle, first carbon oxidation, oxaloacetate => 2-oxoglutarate	1	-3.7745e-14	1	12	0	0	173	2584
	dme04512	ECM-receptor interaction	1	9.29476e-13	1	11	0	0	173	2584
	M00004	Pentose phosphate pathway (Pentose phosphate cycle)	1	9.29476e-13	1	11	0	0	173	2584
	dme00450	Selenocompound metabolism	1	9.29476e-13	1	11	0	0	173	2584
	M00130	Inositol phosphate metabolism, PI=> PIP2 => Ins(1,4,5)P3 => Ins(1,3,4,5)P4	1	9.29476e-13	1	11	0	0	173	2584
	ko00450	Selenocompound metabolism	1	9.29476e-13	1	11	0	0	173	2584
	dme_M00130	Inositol phosphate metabolism, PI=> PIP2 => Ins(1,4,5)P3 => Ins(1,3,4,5)P4	1	9.29476e-13	1	11	0	0	173	2584
	dme_M00004	Pentose phosphate pathway (Pentose phosphate cycle)	1	9.29476e-13	1	11	0	0	173	2584
	ko04512	ECM-receptor interaction	1	9.29476e-13	1	11	0	0	173	2584
	dme00750	Vitamin B6 metabolism	1	9.71485e-13	1	6	0	0	173	2584
	dme_M00285	MCM complex	1	9.71485e-13	1	6	0	0	173	2584
	M00383	ECV complex	1	9.71485e-13	1	6	0	0	173	2584
	M00284	Origin recognition complex	1	9.71485e-13	1	6	0	0	173	2584
	M00404	COPII complex	1	9.71485e-13	1	6	0	0	173	2584
	dme_M00284	Origin recognition complex	1	9.71485e-13	1	6	0	0	173	2584
	dme00604	Glycosphingolipid biosynthesis - ganglio series	1	9.71485e-13	1	6	0	0	173	2584
	dme_M00404	COPII complex	1	9.71485e-13	1	6	0	0	173	2584
	M00285	MCM complex	1	9.71485e-13	1	6	0	0	173	2584
	ko00750	Vitamin B6 metabolism	1	9.71485e-13	1	6	0	0	173	2584
	ko00604	Glycosphingolipid biosynthesis - ganglio series	1	9.71485e-13	1	6	0	0	173	2584
	dme_M00383	ECV complex	1	9.71485e-13	1	6	0	0	173	2584
	dme_M00072	N-glycosylation by oligosaccharyltransferase	1	1.95852e-12	1	7	0	0	173	2584
	dme00430	Taurine and hypotaurine metabolism	1	1.95852e-12	1	7	0	0	173	2584
	M00398	Sm core complex	1	1.95852e-12	1	7	0	0	173	2584
	ko00532	Glycosaminoglycan biosynthesis - chondroitin sulfate / dermatan sulfate	1	1.95852e-12	1	7	0	0	173	2584
	ko00603	Glycosphingolipid biosynthesis - globo series	1	1.95852e-12	1	7	0	0	173	2584
	M00397	Lsm 1-7 complex	1	1.95852e-12	1	7	0	0	173	2584
	M00099	Sphingosine biosynthesis	1	1.95852e-12	1	7	0	0	173	2584
	M00072	N-glycosylation by oligosaccharyltransferase	1	1.95852e-12	1	7	0	0	173	2584
	dme_M00099	Sphingosine biosynthesis	1	1.95852e-12	1	7	0	0	173	2584
	dme_M00148	Succinate dehydrogenase (ubiquinone)	1	1.95852e-12	1	7	0	0	173	2584
	M00148	Succinate dehydrogenase (ubiquinone)	1	1.95852e-12	1	7	0	0	173	2584
	M00396	Lsm 2-8 complex	1	1.95852e-12	1	7	0	0	173	2584
	ko00591	Linoleic acid metabolism	1	1.95852e-12	1	7	0	0	173	2584
	dme00603	Glycosphingolipid biosynthesis - globo series	1	1.95852e-12	1	7	0	0	173	2584
	dme00591	Linoleic acid metabolism	1	1.95852e-12	1	7	0	0	173	2584
	dme_M00398	Sm core complex	1	1.95852e-12	1	7	0	0	173	2584
	dme_M00396	Lsm 2-8 complex	1	1.95852e-12	1	7	0	0	173	2584
	dme00532	Glycosaminoglycan biosynthesis - chondroitin sulfate / dermatan sulfate	1	1.95852e-12	1	7	0	0	173	2584
	ko00430	Taurine and hypotaurine metabolism	1	1.95852e-12	1	7	0	0	173	2584
	dme_M00397	Lsm 1-7 complex	1	1.95852e-12	1	7	0	0	173	2584
	M00095	C5 isoprenoid biosynthesis, mevalonate pathway	1	2.23991e-12	1	8	0	0	173	2584
	M00632	Galactose degradation, Leloir pathway, galactose => alpha-D-glucose-1P	1	2.23991e-12	1	8	0	0	173	2584
	M00428	eIF4F complex	1	2.23991e-12	1	8	0	0	173	2584
	dme_M00428	eIF4F complex	1	2.23991e-12	1	8	0	0	173	2584
	dme_M00632	Galactose degradation, Leloir pathway, galactose => alpha-D-glucose-1P	1	2.23991e-12	1	8	0	0	173	2584
	dme_M00095	C5 isoprenoid biosynthesis, mevalonate pathway	1	2.23991e-12	1	8	0	0	173	2584
	M00131	Inositol phosphate metabolism, Ins(1,3,4,5)P4 => Ins(1,3,4)P3 => myo-inositol	1	2.95361e-12	1	10	0	0	173	2584
	dme_M00131	Inositol phosphate metabolism, Ins(1,3,4,5)P4 => Ins(1,3,4)P3 => myo-inositol	1	2.95361e-12	1	10	0	0	173	2584
	dme_M00034	Methionine salvage pathway	1	3.09777e-12	1	9	0	0	173	2584
	M00351	Spliceosome, U1-snRNP	1	3.09777e-12	1	9	0	0	173	2584
	M00034	Methionine salvage pathway	1	3.09777e-12	1	9	0	0	173	2584
	dme02010	ABC transporters	1	3.09777e-12	1	9	0	0	173	2584
	dme_M00351	Spliceosome, U1-snRNP	1	3.09777e-12	1	9	0	0	173	2584
	ko02010	ABC transporters	1	3.09777e-12	1	9	0	0	173	2584
	dme_M00147	NADH dehydrogenase (ubiquinone) 1 beta subcomplex	1	3.45229e-12	1	13	0	0	173	2584
	M00147	NADH dehydrogenase (ubiquinone) 1 beta subcomplex	1	3.45229e-12	1	13	0	0	173	2584
	ko00590	Arachidonic acid metabolism	1	3.45229e-12	1	13	0	0	173	2584
	dme00590	Arachidonic acid metabolism	1	3.45229e-12	1	13	0	0	173	2584
	M00158	F-type ATPase, eukaryotes	1	5.6745e-12	1	16	0	0	173	2584
	dme00531	Glycosaminoglycan degradation	1	5.6745e-12	1	16	0	0	173	2584
	dme_M00158	F-type ATPase, eukaryotes	1	5.6745e-12	1	16	0	0	173	2584
	ko00531	Glycosaminoglycan degradation	1	5.6745e-12	1	16	0	0	173	2584
	dme_M00143	NADH dehydrogenase (ubiquinone) Fe-S protein/flavoprotein complex, mitochondria	1	6.11495e-12	1	14	0	0	173	2584
	M00143	NADH dehydrogenase (ubiquinone) Fe-S protein/flavoprotein complex, mitochondria	1	6.11495e-12	1	14	0	0	173	2584
	dme_M00146	NADH dehydrogenase (ubiquinone) 1 alpha subcomplex	1	6.11495e-12	1	14	0	0	173	2584
	M00146	NADH dehydrogenase (ubiquinone) 1 alpha subcomplex	1	6.11495e-12	1	14	0	0	173	2584
	dme00512	Mucin type O-Glycan biosynthesis	1	7.30526e-12	1	15	0	0	173	2584
	ko00512	Mucin type O-Glycan biosynthesis	1	7.30526e-12	1	15	0	0	173	2584
	dme_M00154	Cytochrome c oxidase	1	7.42121e-12	1	19	0	0	173	2584
	M00154	Cytochrome c oxidase	1	7.42121e-12	1	19	0	0	173	2584
	dme01210	2-Oxocarboxylic acid metabolism	1	9.4789e-12	1	18	0	0	173	2584
	dme00900	Terpenoid backbone biosynthesis	1	9.4789e-12	1	18	0	0	173	2584
	ko00900	Terpenoid backbone biosynthesis	1	9.4789e-12	1	18	0	0	173	2584
	ko01210	2-Oxocarboxylic acid metabolism	1	9.4789e-12	1	18	0	0	173	2584
	ko00790	Folate biosynthesis	1	1.1137e-11	1	24	0	0	173	2584
	dme00790	Folate biosynthesis	1	1.1137e-11	1	24	0	0	173	2584
	dme03060	Protein export	1	1.14014e-11	1	22	0	0	173	2584
	dme_M00341	Proteasome, 19S regulatory particle (PA700)	1	1.14014e-11	1	22	0	0	173	2584
	ko03060	Protein export	1	1.14014e-11	1	22	0	0	173	2584
	M00341	Proteasome, 19S regulatory particle (PA700)	1	1.14014e-11	1	22	0	0	173	2584
	dme00270	Cysteine and methionine metabolism	1	1.25081e-11	1	26	0	0	173	2584
	ko00270	Cysteine and methionine metabolism	1	1.25081e-11	1	26	0	0	173	2584
	dme00051	Fructose and mannose metabolism	1	1.34857e-11	1	28	0	0	173	2584
	ko00051	Fructose and mannose metabolism	1	1.34857e-11	1	28	0	0	173	2584
	dme00250	Alanine, aspartate and glutamate metabolism	1	1.42452e-11	1	29	0	0	173	2584
	ko00250	Alanine, aspartate and glutamate metabolism	1	1.42452e-11	1	29	0	0	173	2584
	dme00310	Lysine degradation	1	1.49405e-11	1	31	0	0	173	2584
	ko00310	Lysine degradation	1	1.49405e-11	1	31	0	0	173	2584
	ko00830	Retinol metabolism	1	1.49405e-11	1	31	0	0	173	2584
	dme00830	Retinol metabolism	1	1.49405e-11	1	31	0	0	173	2584
	dme00053	Ascorbate and aldarate metabolism	1	1.62935e-11	1	30	0	0	173	2584
	ko00053	Ascorbate and aldarate metabolism	1	1.62935e-11	1	30	0	0	173	2584
	dme_M00014	Glucuronate pathway (uronate pathway)	1	2.0672e-11	1	35	0	0	173	2584
	M00014	Glucuronate pathway (uronate pathway)	1	2.0672e-11	1	35	0	0	173	2584

## Sheet: Cl9
Significant Kegg terms	TermID	Term	Enrichment	logP	FDR_BH	Genes in Term	Target Genes in Term	Fraction of Targets in Term	Total Target Genes	Total Genes	Entrez Gene IDs	Gene Symbols
Enrichment p<0.01	dme03040	Spliceosome	0.00434882	-5.43785	1	125	12	0.113208	106	2584	4.00643e+61	CG6841,CG10777,CG6418,l(2)37Cb,CG9346,CG6015,CG4119,crn,Tango4,snRNA:U2:34ABa,bl,CG15525
Enrichment p<0.01	ko03040	Spliceosome	0.00434882	-5.43785	1	125	12	0.113208	106	2584	4.00643e+61	CG6841,CG10777,CG6418,l(2)37Cb,CG9346,CG6015,CG4119,crn,Tango4,snRNA:U2:34ABa,bl,CG15525
	dme04068	FoxO signaling pathway	0.0165814	-4.09947	1	51	6	0.0566038	106	2584	4.03844e+29	SAK,CG11658,Usp7,CycB3,Ras85D,chico
	M00355	Spliceosome, 35S U5-snRNP	0.0221514	-3.80986	1	40	5	0.0471698	106	2584	3.12083e+24	crn,Tango4,CG8833,CG6015,CG15525
	dme_M00355	Spliceosome, 35S U5-snRNP	0.0221514	-3.80986	1	40	5	0.0471698	106	2584	3.12083e+24	crn,Tango4,CG8833,CG6015,CG15525
	ko04320	Dorso-ventral axis formation	0.0226717	-3.78664	1	27	4	0.0377358	106	2584	4.27575e+19	pnt,fs(1)K10,piwi,Ras85D
	dme04320	Dorso-ventral axis formation	0.0226717	-3.78664	1	27	4	0.0377358	106	2584	4.27575e+19	pnt,fs(1)K10,piwi,Ras85D
	ko00130	Ubiquinone and other terpenoid-quinone biosynthesis	0.0497092	-3.00157	1	9	2	0.0188679	106	2584	381943346188	GC,Vkor
	dme00130	Ubiquinone and other terpenoid-quinone biosynthesis	0.0497092	-3.00157	1	9	2	0.0188679	106	2584	381943346188	GC,Vkor
	ko04144	Endocytosis	0.0632922	-2.75999	1	87	7	0.0660377	106	2584	4.03274e+34	siz,lack,shi,nuf,elgi,Nedd4,baz
	dme04144	Endocytosis	0.0632922	-2.75999	1	87	7	0.0660377	106	2584	4.03274e+34	siz,lack,shi,nuf,elgi,Nedd4,baz
	ko03022	Basal transcription factors	0.0732344	-2.61409	1	39	4	0.0377358	106	2584	4.79004e+19	Taf5,Taf6,Taf12,TfIIB
	dme03022	Basal transcription factors	0.0732344	-2.61409	1	39	4	0.0377358	106	2584	4.79004e+19	Taf5,Taf6,Taf12,TfIIB
	ko04391	Hippo signaling pathway - fly	0.0818256	-2.50317	1	57	5	0.0471698	106	2584	3.78514e+24	yki,tsh,scrib,baz,dlg1
	dme04391	Hippo signaling pathway - fly	0.0818256	-2.50317	1	57	5	0.0471698	106	2584	3.78514e+24	yki,tsh,scrib,baz,dlg1
	ko04120	Ubiquitin mediated proteolysis	0.104299	-2.2605	1	98	7	0.0660377	106	2584	4.59064e+34	mr,Uba3,lack,CG8188,park,Vhl,Nedd4
	dme04120	Ubiquitin mediated proteolysis	0.104299	-2.2605	1	98	7	0.0660377	106	2584	4.59064e+34	mr,Uba3,lack,CG8188,park,Vhl,Nedd4
	dme00780	Biotin metabolism	0.11813	-2.13597	1	3	1	0.00943396	106	2584	40659	Hcs
	ko00780	Biotin metabolism	0.11813	-2.13597	1	3	1	0.00943396	106	2584	40659	Hcs
	dme_M00263	DNA polymerase epsilon complex	0.154347	-1.86855	1	4	1	0.00943396	106	2584	37560	Mes4
	M00263	DNA polymerase epsilon complex	0.154347	-1.86855	1	4	1	0.00943396	106	2584	37560	Mes4
	M00027	GABA (gamma-Aminobutyrate) shunt	0.154347	-1.86855	1	4	1	0.00943396	106	2584	40188	CG7433
	dme_M00027	GABA (gamma-Aminobutyrate) shunt	0.154347	-1.86855	1	4	1	0.00943396	106	2584	40188	CG7433
	dme04013	MAPK signaling pathway - fly	0.166849	-1.79066	1	18	2	0.0188679	106	2584	4275741140	pnt,Ras85D
	ko04013	MAPK signaling pathway - fly	0.166849	-1.79066	1	18	2	0.0188679	106	2584	4275741140	pnt,Ras85D
	dme03410	Base excision repair	0.196816	-1.62548	1	20	2	0.0188679	106	2584	3756042078	Mes4,CG5285
	ko03410	Base excision repair	0.196816	-1.62548	1	20	2	0.0188679	106	2584	3756042078	Mes4,CG5285
	dme00564	Glycerophospholipid metabolism	0.212587	-1.54841	1	58	4	0.0377358	106	2584	3.57904e+20	Lpin,sPLA2,CG33116,Dgk
	ko00564	Glycerophospholipid metabolism	0.212587	-1.54841	1	58	4	0.0377358	106	2584	3.57904e+20	Lpin,sPLA2,CG33116,Dgk
	ko03450	Non-homologous end-joining	0.222421	-1.50319	1	6	1	0.00943396	106	2584	32322	Lig4
	M00383	ECV complex	0.222421	-1.50319	1	6	1	0.00943396	106	2584	53433	Vhl
	dme_M00092	Phosphatidylethanolamine (PE) biosynthesis, ethanolamine => PE	0.222421	-1.50319	1	6	1	0.00943396	106	2584	326259	CG33116
	M00092	Phosphatidylethanolamine (PE) biosynthesis, ethanolamine => PE	0.222421	-1.50319	1	6	1	0.00943396	106	2584	326259	CG33116
	dme03450	Non-homologous end-joining	0.222421	-1.50319	1	6	1	0.00943396	106	2584	32322	Lig4
	dme_M00383	ECV complex	0.222421	-1.50319	1	6	1	0.00943396	106	2584	53433	Vhl
	ko04070	Phosphatidylinositol signaling system	0.23541	-1.44643	1	41	3	0.0283019	106	2584	377333932935738	Pi3K59F,Pi3K68D,Dgk
	dme04070	Phosphatidylinositol signaling system	0.23541	-1.44643	1	41	3	0.0283019	106	2584	377333932935738	Pi3K59F,Pi3K68D,Dgk
	ko00565	Ether lipid metabolism	0.242804	-1.4155	1	23	2	0.0188679	106	2584	35665326259	sPLA2,CG33116
	dme00565	Ether lipid metabolism	0.242804	-1.4155	1	23	2	0.0188679	106	2584	35665326259	sPLA2,CG33116
	ko00591	Linoleic acid metabolism	0.254392	-1.36888	1	7	1	0.00943396	106	2584	35665	sPLA2
	dme00591	Linoleic acid metabolism	0.254392	-1.36888	1	7	1	0.00943396	106	2584	35665	sPLA2
	dme00561	Glycerolipid metabolism	0.268994	-1.31307	1	44	3	0.0283019	106	2584	362823579035738	CG8298,Lpin,Dgk
	ko00561	Glycerolipid metabolism	0.268994	-1.31307	1	44	3	0.0283019	106	2584	362823579035738	CG8298,Lpin,Dgk
	dme00230	Purine metabolism	0.289378	-1.24002	1	131	7	0.0660377	106	2584	3.11944e+34	pn,Mes4,veil,Pde8,Ac3,Ac13E,RpII215
	ko00230	Purine metabolism	0.289378	-1.24002	1	131	7	0.0660377	106	2584	3.11944e+34	pn,Mes4,veil,Pde8,Ac3,Ac13E,RpII215
	dme04745	Phototransduction - fly	0.30466	-1.18856	1	27	2	0.0188679	106	2584	3234337629	inaE,inaD
	ko04745	Phototransduction - fly	0.30466	-1.18856	1	27	2	0.0188679	106	2584	3234337629	inaE,inaD
	ko04122	Sulfur relay system	0.314481	-1.15683	1	9	1	0.00943396	106	2584	35234	CG10189
	dme04122	Sulfur relay system	0.314481	-1.15683	1	9	1	0.00943396	106	2584	35234	CG10189
	dme00250	Alanine, aspartate and glutamate metabolism	0.335337	-1.09262	1	29	2	0.0188679	106	2584	3612840188	CG12338,CG7433
	ko00250	Alanine, aspartate and glutamate metabolism	0.335337	-1.09262	1	29	2	0.0188679	106	2584	3612840188	CG12338,CG7433
	dme00053	Ascorbate and aldarate metabolism	0.350537	-1.04829	1	30	2	0.0188679	106	2584	4157341574	CG5724,CG5999
	ko00053	Ascorbate and aldarate metabolism	0.350537	-1.04829	1	30	2	0.0188679	106	2584	4157341574	CG5724,CG5999
	ko00830	Retinol metabolism	0.365621	-1.00616	1	31	2	0.0188679	106	2584	4157341574	CG5724,CG5999
	dme00830	Retinol metabolism	0.365621	-1.00616	1	31	2	0.0188679	106	2584	4157341574	CG5724,CG5999
	dme04512	ECM-receptor interaction	0.369768	-0.994879	1	11	1	0.00943396	106	2584	43946	wb
	ko04512	ECM-receptor interaction	0.369768	-0.994879	1	11	1	0.00943396	106	2584	43946	wb
	dme_M00180	RNA polymerase II, eukaryotes	0.395732	-0.927018	1	12	1	0.00943396	106	2584	32100	RpII215
	dme00670	One carbon pool by folate	0.395732	-0.927018	1	12	1	0.00943396	106	2584	35407	CG8665
	M00180	RNA polymerase II, eukaryotes	0.395732	-0.927018	1	12	1	0.00943396	106	2584	32100	RpII215
	dme00592	alpha-Linolenic acid metabolism	0.395732	-0.927018	1	12	1	0.00943396	106	2584	35665	sPLA2
	ko00670	One carbon pool by folate	0.395732	-0.927018	1	12	1	0.00943396	106	2584	35407	CG8665
	ko00592	alpha-Linolenic acid metabolism	0.395732	-0.927018	1	12	1	0.00943396	106	2584	35665	sPLA2
	dme_M00055	N-glycan precursor biosynthesis	0.420636	-0.865988	1	13	1	0.00943396	106	2584	42146	CG18012
	M00055	N-glycan precursor biosynthesis	0.420636	-0.865988	1	13	1	0.00943396	106	2584	42146	CG18012
	dme00760	Nicotinate and nicotinamide metabolism	0.420636	-0.865988	1	13	1	0.00943396	106	2584	36968	veil
	ko00740	Riboflavin metabolism	0.420636	-0.865988	1	13	1	0.00943396	106	2584	32240	CG4407
	ko00760	Nicotinate and nicotinamide metabolism	0.420636	-0.865988	1	13	1	0.00943396	106	2584	36968	veil
	ko00590	Arachidonic acid metabolism	0.420636	-0.865988	1	13	1	0.00943396	106	2584	35665	sPLA2
	dme00740	Riboflavin metabolism	0.420636	-0.865988	1	13	1	0.00943396	106	2584	32240	CG4407
	dme00590	Arachidonic acid metabolism	0.420636	-0.865988	1	13	1	0.00943396	106	2584	35665	sPLA2
	dme_M00014	Glucuronate pathway (uronate pathway)	0.424498	-0.856849	1	35	2	0.0188679	106	2584	4157341574	CG5724,CG5999
	ko03030	DNA replication	0.424498	-0.856849	1	35	2	0.0188679	106	2584	3756035746	Mes4,rnh1
	dme03030	DNA replication	0.424498	-0.856849	1	35	2	0.0188679	106	2584	3756035746	Mes4,rnh1
	M00014	Glucuronate pathway (uronate pathway)	0.424498	-0.856849	1	35	2	0.0188679	106	2584	4157341574	CG5724,CG5999
	ko00562	Inositol phosphate metabolism	0.438789	-0.823736	1	36	2	0.0188679	106	2584	3773339329	Pi3K59F,Pi3K68D
	ko04150	mTOR signaling pathway	0.438789	-0.823736	1	36	2	0.0188679	106	2584	4020164880	gig,chico
	dme04150	mTOR signaling pathway	0.438789	-0.823736	1	36	2	0.0188679	106	2584	4020164880	gig,chico
	dme00562	Inositol phosphate metabolism	0.438789	-0.823736	1	36	2	0.0188679	106	2584	3773339329	Pi3K59F,Pi3K68D
	ko00500	Starch and sucrose metabolism	0.450014	-0.798477	1	60	3	0.0283019	106	2584	415734157435830	CG5724,CG5999,Mal-A8
	dme00500	Starch and sucrose metabolism	0.450014	-0.798477	1	60	3	0.0283019	106	2584	415734157435830	CG5724,CG5999,Mal-A8
	ko00510	N-Glycan biosynthesis	0.452889	-0.792107	1	37	2	0.0188679	106	2584	4214643563	CG18012,Mgat2
	dme00510	N-Glycan biosynthesis	0.452889	-0.792107	1	37	2	0.0188679	106	2584	4214643563	CG18012,Mgat2
	M00389	APC/C complex	0.467433	-0.760499	1	15	1	0.00943396	106	2584	45906	mr
	dme_M00389	APC/C complex	0.467433	-0.760499	1	15	1	0.00943396	106	2584	45906	mr
	dme00512	Mucin type O-Glycan biosynthesis	0.467433	-0.760499	1	15	1	0.00943396	106	2584	33556	pgant2
	ko00512	Mucin type O-Glycan biosynthesis	0.467433	-0.760499	1	15	1	0.00943396	106	2584	33556	pgant2
	ko03420	Nucleotide excision repair	0.480482	-0.732966	1	39	2	0.0188679	106	2584	375603772069	Mes4,mus201
	dme03420	Nucleotide excision repair	0.480482	-0.732966	1	39	2	0.0188679	106	2584	375603772069	Mes4,mus201
	dme00531	Glycosaminoglycan degradation	0.489408	-0.71456	1	16	1	0.00943396	106	2584	31423	CG6903
	ko00531	Glycosaminoglycan degradation	0.489408	-0.71456	1	16	1	0.00943396	106	2584	31423	CG6903
	M00353	Spliceosome, Prp19/CDC5L complex	0.510483	-0.672397	1	17	1	0.00943396	106	2584	32168	Tango4
	dme_M00353	Spliceosome, Prp19/CDC5L complex	0.510483	-0.672397	1	17	1	0.00943396	106	2584	32168	Tango4
	dme_M00430	Exon junction complex (EJC)	0.510483	-0.672397	1	17	1	0.00943396	106	2584	39483	SRm160
	M00430	Exon junction complex (EJC)	0.510483	-0.672397	1	17	1	0.00943396	106	2584	39483	SRm160
	ko00650	Butanoate metabolism	0.510483	-0.672397	1	17	1	0.00943396	106	2584	40188	CG7433
	dme00650	Butanoate metabolism	0.510483	-0.672397	1	17	1	0.00943396	106	2584	40188	CG7433
	ko04140	Regulation of autophagy	0.530697	-0.633564	1	18	1	0.00943396	106	2584	37733	Pi3K59F
	dme04140	Regulation of autophagy	0.530697	-0.633564	1	18	1	0.00943396	106	2584	37733	Pi3K59F
	dme00410	beta-Alanine metabolism	0.530697	-0.633564	1	18	1	0.00943396	106	2584	40188	CG7433
	ko00410	beta-Alanine metabolism	0.530697	-0.633564	1	18	1	0.00943396	106	2584	40188	CG7433
	dme00860	Porphyrin and chlorophyll metabolism	0.53306	-0.629121	1	43	2	0.0188679	106	2584	4157341574	CG5724,CG5999
	ko00860	Porphyrin and chlorophyll metabolism	0.53306	-0.629121	1	43	2	0.0188679	106	2584	4157341574	CG5724,CG5999
	dme04146	Peroxisome	0.534431	-0.626553	1	68	3	0.0283019	106	2584	406153853236128	CG2022,CG32250,CG12338
	ko04146	Peroxisome	0.534431	-0.626553	1	68	3	0.0283019	106	2584	406153853236128	CG2022,CG32250,CG12338
	ko04080	Neuroactive ligand-receptor interaction	0.545635	-0.605805	1	44	2	0.0188679	106	2584	4831632703	alphaTry,baz
	dme04080	Neuroactive ligand-receptor interaction	0.545635	-0.605805	1	44	2	0.0188679	106	2584	4831632703	alphaTry,baz
	dme_M00154	Cytochrome c oxidase	0.550084	-0.597685	1	19	1	0.00943396	106	2584	40995	CG18193
	M00352	Spliceosome, U2-snRNP	0.550084	-0.597685	1	19	1	0.00943396	106	2584	39218	CG6418
	dme00563	Glycosylphosphatidylinositol(GPI)-anchor biosynthesis	0.550084	-0.597685	1	19	1	0.00943396	106	2584	37020	CG6401
[truncated: 378 more rows]

## Sheet: Cl10
Significant Kegg terms	TermID	Term	Enrichment	logP	FDR_BH	Genes in Term	Target Genes in Term	Fraction of Targets in Term	Total Target Genes	Total Genes	Entrez Gene IDs	Gene Symbols
[truncated: 488 more rows]

[truncated: 1 more sheets: Cl11]
